# Supplementary material for: Evolutionarily new genes in humans with disease phenotypes reveal functional enrichment patterns shaped by adaptive innovation and sexual selection
Source: bioRxiv preprint, doi:10.1101/2023.11.14.567139, version 7 (2024-09-04)
Supplement: Supplemental Table S1 [file 567139_file10.xlsx]

## Sheet: Sheet1
S1. The gene age information for 19,665 protein-coding genes from autosomes, X, and Y chromosomes.
Ensembl ID	Symbol	Chr	Branch	Age_7_groups	Age_4_groups
ENSG00000106077	ABHD11	7	0	Euteleostomi	Euteleostomi
ENSG00000153093	ACOXL	2	0	Euteleostomi	Euteleostomi
ENSG00000188493	ACTMAP	19	0	Euteleostomi	Euteleostomi
ENSG00000145536	ADAMTS16	5	0	Euteleostomi	Euteleostomi
ENSG00000173137	ADCK5	8	0	Euteleostomi	Euteleostomi
ENSG00000153292	ADGRF1	6	0	Euteleostomi	Euteleostomi
ENSG00000184160	ADRA2C	4	0	Euteleostomi	Euteleostomi
ENSG00000211454	AKR7L	1	0	Euteleostomi	Euteleostomi
ENSG00000204673	AKT1S1	19	0	Euteleostomi	Euteleostomi
ENSG00000175548	ALG10B	12	0	Euteleostomi	Euteleostomi
ENSG00000135409	AMHR2	12	0	Euteleostomi	Euteleostomi
ENSG00000196704	AMZ2	17	0	Euteleostomi	Euteleostomi
ENSG00000106367	AP1S1	7	0	Euteleostomi	Euteleostomi
ENSG00000125843	AP5S1	20	0	Euteleostomi	Euteleostomi
ENSG00000130203	APOE	19	0	Euteleostomi	Euteleostomi
ENSG00000004059	ARF5	7	0	Euteleostomi	Euteleostomi
ENSG00000241484	ARHGAP8	22	0	Euteleostomi	Euteleostomi
ENSG00000123329	ARHGAP9	12	0	Euteleostomi	Euteleostomi
ENSG00000076928	ARHGEF1	19	0	Euteleostomi	Euteleostomi
ENSG00000141480	ARRB2	17	0	Euteleostomi	Euteleostomi
ENSG00000070669	ASNS	7	0	Euteleostomi	Euteleostomi
ENSG00000174939	ASPHD1	16	0	Euteleostomi	Euteleostomi
ENSG00000106819	ASPN	9	0	Euteleostomi	Euteleostomi
ENSG00000114573	ATP6V1A	3	0	Euteleostomi	Euteleostomi
ENSG00000137875	BCL2L10	15	0	Euteleostomi	Euteleostomi
ENSG00000130385	BMP15	X	0	Euteleostomi	Euteleostomi
ENSG00000163141	BNIPL	1	0	Euteleostomi	Euteleostomi
ENSG00000175573	C11orf68	11	0	Euteleostomi	Euteleostomi
ENSG00000179476	C14orf28	14	0	Euteleostomi	Euteleostomi
ENSG00000258315	C17orf49	17	0	Euteleostomi	Euteleostomi
ENSG00000104979	C19orf53	19	0	Euteleostomi	Euteleostomi
ENSG00000116922	C1orf109	1	0	Euteleostomi	Euteleostomi
ENSG00000175262	C1orf127	1	0	Euteleostomi	Euteleostomi
ENSG00000204128	C2orf72	2	0	Euteleostomi	Euteleostomi
ENSG00000244731	C4A	6	0	Euteleostomi	Euteleostomi
ENSG00000137225	CAPN11	6	0	Euteleostomi	Euteleostomi
ENSG00000118729	CASQ2	1	0	Euteleostomi	Euteleostomi
ENSG00000159214	CCDC24	1	0	Euteleostomi	Euteleostomi
ENSG00000277200	CCDC92B	17	0	Euteleostomi	Euteleostomi
ENSG00000105219	CCNP	19	0	Euteleostomi	Euteleostomi
ENSG00000008128	CDK11A	1	0	Euteleostomi	Euteleostomi
ENSG00000188312	CENPP	9	0	Euteleostomi	Euteleostomi
ENSG00000112877	CEP72	5	0	Euteleostomi	Euteleostomi
ENSG00000160401	CFAP157	9	0	Euteleostomi	Euteleostomi
ENSG00000215217	CFAP90	5	0	Euteleostomi	Euteleostomi
ENSG00000170175	CHRNB1	17	0	Euteleostomi	Euteleostomi
ENSG00000180767	CHST13	3	0	Euteleostomi	Euteleostomi
ENSG00000159208	CIART	1	0	Euteleostomi	Euteleostomi
ENSG00000125931	CITED1	X	0	Euteleostomi	Euteleostomi
ENSG00000104879	CKM	19	0	Euteleostomi	Euteleostomi
ENSG00000237289	CKMT1B	15	0	Euteleostomi	Euteleostomi
ENSG00000069493	CLEC2D	12	0	Euteleostomi	Euteleostomi
ENSG00000120885	CLU	8	0	Euteleostomi	Euteleostomi
ENSG00000206561	COLQ	3	0	Euteleostomi	Euteleostomi
ENSG00000168993	CPLX1	4	0	Euteleostomi	Euteleostomi
ENSG00000177685	CRACR2B	11	0	Euteleostomi	Euteleostomi
ENSG00000146215	CRIP3	6	0	Euteleostomi	Euteleostomi
ENSG00000124490	CRISP2	6	0	Euteleostomi	Euteleostomi
ENSG00000140577	CRTC3	15	0	Euteleostomi	Euteleostomi
ENSG00000196431	CRYBA4	22	0	Euteleostomi	Euteleostomi
ENSG00000100122	CRYBB1	22	0	Euteleostomi	Euteleostomi
ENSG00000244752	CRYBB2	22	0	Euteleostomi	Euteleostomi
ENSG00000100053	CRYBB3	22	0	Euteleostomi	Euteleostomi
ENSG00000178531	CTXN1	19	0	Euteleostomi	Euteleostomi
ENSG00000180871	CXCR2	2	0	Euteleostomi	Euteleostomi
ENSG00000204209	DAXX	6	0	Euteleostomi	Euteleostomi
ENSG00000092345	DAZL	3	0	Euteleostomi	Euteleostomi
ENSG00000163357	DCST1	1	0	Euteleostomi	Euteleostomi
ENSG00000163354	DCST2	1	0	Euteleostomi	Euteleostomi
ENSG00000213722	DDAH2	6	0	Euteleostomi	Euteleostomi
ENSG00000110011	DNAJC4	11	0	Euteleostomi	Euteleostomi
ENSG00000163793	DNAJC5G	2	0	Euteleostomi	Euteleostomi
ENSG00000179085	DPM3	1	0	Euteleostomi	Euteleostomi
ENSG00000175550	DRAP1	11	0	Euteleostomi	Euteleostomi
ENSG00000134755	DSC2	18	0	Euteleostomi	Euteleostomi
ENSG00000134762	DSC3	18	0	Euteleostomi	Euteleostomi
ENSG00000134757	DSG3	18	0	Euteleostomi	Euteleostomi
ENSG00000105204	DYRK1B	19	0	Euteleostomi	Euteleostomi
ENSG00000127129	EDN2	1	0	Euteleostomi	Euteleostomi
ENSG00000108947	EFNB3	17	0	Euteleostomi	Euteleostomi
ENSG00000173442	EHBP1L1	11	0	Euteleostomi	Euteleostomi
ENSG00000128886	ELL3	15	0	Euteleostomi	Euteleostomi
ENSG00000170291	ELP5	17	0	Euteleostomi	Euteleostomi
ENSG00000100908	EMC9	14	0	Euteleostomi	Euteleostomi
ENSG00000106991	ENG	9	0	Euteleostomi	Euteleostomi
ENSG00000198758	EPS8L3	1	0	Euteleostomi	Euteleostomi
ENSG00000164308	ERAP2	5	0	Euteleostomi	Euteleostomi
ENSG00000205436	EXOC3L4	14	0	Euteleostomi	Euteleostomi
ENSG00000178896	EXOSC4	8	0	Euteleostomi	Euteleostomi
ENSG00000221968	FADS3	11	0	Euteleostomi	Euteleostomi
ENSG00000185519	FAM131C	1	0	Euteleostomi	Euteleostomi
ENSG00000162391	FAM151A	1	0	Euteleostomi	Euteleostomi
ENSG00000222011	FAM185A	7	0	Euteleostomi	Euteleostomi
ENSG00000105058	FAM32A	19	0	Euteleostomi	Euteleostomi
ENSG00000267673	FDX2	19	0	Euteleostomi	Euteleostomi
ENSG00000137440	FGFBP1	4	0	Euteleostomi	Euteleostomi
ENSG00000172500	FIBP	11	0	Euteleostomi	Euteleostomi
ENSG00000198815	FOXJ3	1	0	Euteleostomi	Euteleostomi
ENSG00000099860	GADD45B	19	0	Euteleostomi	Euteleostomi
ENSG00000197093	GAL3ST4	7	0	Euteleostomi	Euteleostomi
ENSG00000130035	GALNT8	12	0	Euteleostomi	Euteleostomi
ENSG00000105679	GAPDHS	19	0	Euteleostomi	Euteleostomi
ENSG00000249948	GBA3	4	0	Euteleostomi	Euteleostomi
ENSG00000164900	GBX1	7	0	Euteleostomi	Euteleostomi
ENSG00000102886	GDPD3	16	0	Euteleostomi	Euteleostomi
ENSG00000100938	GMPR2	14	0	Euteleostomi	Euteleostomi
ENSG00000176533	GNG7	19	0	Euteleostomi	Euteleostomi
ENSG00000125787	GNRH2	20	0	Euteleostomi	Euteleostomi
ENSG00000169154	GOT1L1	8	0	Euteleostomi	Euteleostomi
ENSG00000165370	GPR101	X	0	Euteleostomi	Euteleostomi
ENSG00000143147	GPR161	1	0	Euteleostomi	Euteleostomi
ENSG00000132522	GPS2	17	0	Euteleostomi	Euteleostomi
ENSG00000100077	GRK3	22	0	Euteleostomi	Euteleostomi
ENSG00000065621	GSTO2	10	0	Euteleostomi	Euteleostomi
ENSG00000275713	H2BC9	6	0	Euteleostomi	Euteleostomi
ENSG00000273213	H3-7	1	0	Euteleostomi	Euteleostomi
ENSG00000270276	H4C15	1	0	Euteleostomi	Euteleostomi
ENSG00000274618	H4C6	6	0	Euteleostomi	Euteleostomi
ENSG00000112855	HARS2	5	0	Euteleostomi	Euteleostomi
ENSG00000131351	HAUS8	19	0	Euteleostomi	Euteleostomi
ENSG00000196917	HCAR1	12	0	Euteleostomi	Euteleostomi
ENSG00000163517	HDAC11	3	0	Euteleostomi	Euteleostomi
ENSG00000069812	HES2	1	0	Euteleostomi	Euteleostomi
ENSG00000149929	HIRIP3	16	0	Euteleostomi	Euteleostomi
ENSG00000290292	HOMEZ	14	0	Euteleostomi	Euteleostomi
ENSG00000159184	HOXB13	17	0	Euteleostomi	Euteleostomi
ENSG00000203857	HSD3B1	1	0	Euteleostomi	Euteleostomi
ENSG00000109854	HTATIP2	11	0	Euteleostomi	Euteleostomi
ENSG00000149305	HTR3B	11	0	Euteleostomi	Euteleostomi
ENSG00000163596	ICA1L	2	0	Euteleostomi	Euteleostomi
ENSG00000148377	IDI2	10	0	Euteleostomi	Euteleostomi
ENSG00000068079	IFI35	17	0	Euteleostomi	Euteleostomi
ENSG00000185745	IFIT1	10	0	Euteleostomi	Euteleostomi
ENSG00000204010	IFIT1B	10	0	Euteleostomi	Euteleostomi
ENSG00000119917	IFIT3	10	0	Euteleostomi	Euteleostomi
ENSG00000166333	ILK	11	0	Euteleostomi	Euteleostomi
ENSG00000106348	IMPDH1	7	0	Euteleostomi	Euteleostomi
ENSG00000175189	INHBC	12	0	Euteleostomi	Euteleostomi
ENSG00000172410	INSL5	1	0	Euteleostomi	Euteleostomi
ENSG00000196497	IPO4	14	0	Euteleostomi	Euteleostomi
ENSG00000127080	IPPK	9	0	Euteleostomi	Euteleostomi
ENSG00000166578	IQCD	12	0	Euteleostomi	Euteleostomi
ENSG00000090376	IRAK3	12	0	Euteleostomi	Euteleostomi
ENSG00000123104	ITPR2	12	0	Euteleostomi	Euteleostomi
ENSG00000170049	KCNAB3	17	0	Euteleostomi	Euteleostomi
ENSG00000171121	KCNMB3	3	0	Euteleostomi	Euteleostomi
ENSG00000197077	KIAA1671	22	0	Euteleostomi	Euteleostomi
ENSG00000137171	KLC4	6	0	Euteleostomi	Euteleostomi
ENSG00000124702	KLHDC3	6	0	Euteleostomi	Euteleostomi
ENSG00000117009	KMO	1	0	Euteleostomi	Euteleostomi
ENSG00000167548	KMT2D	12	0	Euteleostomi	Euteleostomi
ENSG00000197324	LRP10	14	0	Euteleostomi	Euteleostomi
ENSG00000162620	LRRIQ3	1	0	Euteleostomi	Euteleostomi
ENSG00000213903	LTB4R	14	0	Euteleostomi	Euteleostomi
ENSG00000213316	LTC4S	5	0	Euteleostomi	Euteleostomi
ENSG00000099949	LZTR1	22	0	Euteleostomi	Euteleostomi
ENSG00000274847	MAFIP	GL000194.1	0	Euteleostomi	Euteleostomi
ENSG00000102316	MAGED2	X	0	Euteleostomi	Euteleostomi
ENSG00000102882	MAPK3	16	0	Euteleostomi	Euteleostomi
ENSG00000124733	MEA1	6	0	Euteleostomi	Euteleostomi
ENSG00000213999	MEF2B	19	0	Euteleostomi	Euteleostomi
ENSG00000185155	MIXL1	1	0	Euteleostomi	Euteleostomi
ENSG00000168404	MLKL	16	0	Euteleostomi	Euteleostomi
ENSG00000099953	MMP11	22	0	Euteleostomi	Euteleostomi
ENSG00000154485	MMP21	10	0	Euteleostomi	Euteleostomi
ENSG00000169184	MN1	22	0	Euteleostomi	Euteleostomi
ENSG00000129255	MPDU1	17	0	Euteleostomi	Euteleostomi
ENSG00000115204	MPV17	2	0	Euteleostomi	Euteleostomi
ENSG00000174547	MRPL11	11	0	Euteleostomi	Euteleostomi
ENSG00000112651	MRPL2	6	0	Euteleostomi	Euteleostomi
ENSG00000198899	MT-ATP6	MT	0	Euteleostomi	Euteleostomi
ENSG00000198804	MT-CO1	MT	0	Euteleostomi	Euteleostomi
ENSG00000198712	MT-CO2	MT	0	Euteleostomi	Euteleostomi
ENSG00000198938	MT-CO3	MT	0	Euteleostomi	Euteleostomi
ENSG00000198727	MT-CYB	MT	0	Euteleostomi	Euteleostomi
ENSG00000198888	MT-ND1	MT	0	Euteleostomi	Euteleostomi
ENSG00000198763	MT-ND2	MT	0	Euteleostomi	Euteleostomi
ENSG00000198840	MT-ND3	MT	0	Euteleostomi	Euteleostomi
ENSG00000198886	MT-ND4	MT	0	Euteleostomi	Euteleostomi
ENSG00000198786	MT-ND5	MT	0	Euteleostomi	Euteleostomi
ENSG00000198695	MT-ND6	MT	0	Euteleostomi	Euteleostomi
ENSG00000198417	MT1F	16	0	Euteleostomi	Euteleostomi
ENSG00000205364	MT1M	16	0	Euteleostomi	Euteleostomi
ENSG00000125148	MT2A	16	0	Euteleostomi	Euteleostomi
ENSG00000133454	MYO18B	22	0	Euteleostomi	Euteleostomi
ENSG00000173418	NAA20	20	0	Euteleostomi	Euteleostomi
ENSG00000121579	NAA50	3	0	Euteleostomi	Euteleostomi
ENSG00000196531	NACA	12	0	Euteleostomi	Euteleostomi
ENSG00000167011	NAT16	7	0	Euteleostomi	Euteleostomi
ENSG00000158092	NCK1	3	0	Euteleostomi	Euteleostomi
ENSG00000185633	NDUFA4L2	12	0	Euteleostomi	Euteleostomi
ENSG00000099795	NDUFB7	19	0	Euteleostomi	Euteleostomi
ENSG00000165028	NIPSNAP3B	9	0	Euteleostomi	Euteleostomi
ENSG00000145506	NKD2	5	0	Euteleostomi	Euteleostomi
ENSG00000167207	NOD2	16	0	Euteleostomi	Euteleostomi
ENSG00000130751	NPAS1	19	0	Euteleostomi	Euteleostomi
ENSG00000174576	NPAS4	11	0	Euteleostomi	Euteleostomi
ENSG00000144852	NR1I2	3	0	Euteleostomi	Euteleostomi
ENSG00000183828	NUDT14	14	0	Euteleostomi	Euteleostomi
ENSG00000135175	OCM2	7	0	Euteleostomi	Euteleostomi
ENSG00000106809	OGN	9	0	Euteleostomi	Euteleostomi
ENSG00000184221	OLIG1	21	0	Euteleostomi	Euteleostomi
ENSG00000127083	OMD	9	0	Euteleostomi	Euteleostomi
ENSG00000155463	OXA1L	14	0	Euteleostomi	Euteleostomi
ENSG00000148985	PGAP2	11	0	Euteleostomi	Euteleostomi
ENSG00000130313	PGLS	19	0	Euteleostomi	Euteleostomi
ENSG00000161031	PGLYRP2	19	0	Euteleostomi	Euteleostomi
ENSG00000040633	PHF23	17	0	Euteleostomi	Euteleostomi
ENSG00000172943	PHF8	X	0	Euteleostomi	Euteleostomi
ENSG00000167103	PIP5KL1	9	0	Euteleostomi	Euteleostomi
ENSG00000180957	PITPNB	22	0	Euteleostomi	Euteleostomi
ENSG00000166473	PKD1L2	16	0	Euteleostomi	Euteleostomi
ENSG00000205038	PKHD1L1	8	0	Euteleostomi	Euteleostomi
ENSG00000129219	PLD2	17	0	Euteleostomi	Euteleostomi
ENSG00000163746	PLSCR2	3	0	Euteleostomi	Euteleostomi
ENSG00000213889	PPM1N	19	0	Euteleostomi	Euteleostomi
ENSG00000137713	PPP2R1B	11	0	Euteleostomi	Euteleostomi
ENSG00000112640	PPP2R5D	6	0	Euteleostomi	Euteleostomi
ENSG00000102103	PQBP1	X	0	Euteleostomi	Euteleostomi
ENSG00000012211	PRICKLE3	X	0	Euteleostomi	Euteleostomi
ENSG00000072062	PRKACA	19	0	Euteleostomi	Euteleostomi
ENSG00000105287	PRKD2	19	0	Euteleostomi	Euteleostomi
ENSG00000198890	PRMT6	1	0	Euteleostomi	Euteleostomi
ENSG00000288701	PRRC2B	9	0	Euteleostomi	Euteleostomi
ENSG00000167371	PRRT2	16	0	Euteleostomi	Euteleostomi
ENSG00000100911	PSME2	14	0	Euteleostomi	Euteleostomi
ENSG00000182077	PTCHD3	10	0	Euteleostomi	Euteleostomi
ENSG00000100994	PYGB	20	0	Euteleostomi	Euteleostomi
ENSG00000131242	RAB11FIP4	17	0	Euteleostomi	Euteleostomi
ENSG00000107551	RASSF4	10	0	Euteleostomi	Euteleostomi
ENSG00000176731	RBIS	8	0	Euteleostomi	Euteleostomi
ENSG00000135437	RDH5	12	0	Euteleostomi	Euteleostomi
ENSG00000100918	REC8	14	0	Euteleostomi	Euteleostomi
ENSG00000177181	RIMKLA	1	0	Euteleostomi	Euteleostomi
ENSG00000149489	ROM1	11	0	Euteleostomi	Euteleostomi
ENSG00000163993	S100P	4	0	Euteleostomi	Euteleostomi
ENSG00000286075	SAGSIN1	7	0	Euteleostomi	Euteleostomi
ENSG00000141858	SAMD1	19	0	Euteleostomi	Euteleostomi
ENSG00000126524	SBDS	7	0	Euteleostomi	Euteleostomi
ENSG00000261678	SCRT1	8	0	Euteleostomi	Euteleostomi
ENSG00000135622	SEMA4F	2	0	Euteleostomi	Euteleostomi
ENSG00000100095	SEZ6L	22	0	Euteleostomi	Euteleostomi
ENSG00000213064	SFT2D2	1	0	Euteleostomi	Euteleostomi
ENSG00000125731	SH2D3A	19	0	Euteleostomi	Euteleostomi
ENSG00000161681	SHANK1	19	0	Euteleostomi	Euteleostomi
ENSG00000164403	SHROOM1	5	0	Euteleostomi	Euteleostomi
ENSG00000161643	SIGLEC16	19	0	Euteleostomi	Euteleostomi
ENSG00000108932	SLC16A6	17	0	Euteleostomi	Euteleostomi
ENSG00000130304	SLC27A1	19	0	Euteleostomi	Euteleostomi
ENSG00000181856	SLC2A4	17	0	Euteleostomi	Euteleostomi
ENSG00000142319	SLC6A3	5	0	Euteleostomi	Euteleostomi
ENSG00000155465	SLC7A7	14	0	Euteleostomi	Euteleostomi
ENSG00000214046	SMIM7	19	0	Euteleostomi	Euteleostomi
ENSG00000104852	SNRNP70	19	0	Euteleostomi	Euteleostomi
ENSG00000291237	SOD2	6	0	Euteleostomi	Euteleostomi
ENSG00000150628	SPATA4	4	0	Euteleostomi	Euteleostomi
ENSG00000134548	SPX	12	0	Euteleostomi	Euteleostomi
ENSG00000100104	SRRD	22	0	Euteleostomi	Euteleostomi
ENSG00000214530	STARD10	11	0	Euteleostomi	Euteleostomi
ENSG00000076944	STXBP2	19	0	Euteleostomi	Euteleostomi
ENSG00000102003	SYP	X	0	Euteleostomi	Euteleostomi
ENSG00000213023	SYT3	19	0	Euteleostomi	Euteleostomi
ENSG00000139192	TAPBPL	12	0	Euteleostomi	Euteleostomi
ENSG00000104946	TBC1D17	19	0	Euteleostomi	Euteleostomi
ENSG00000154144	TBRG1	11	0	Euteleostomi	Euteleostomi
ENSG00000163792	TCF23	2	0	Euteleostomi	Euteleostomi
ENSG00000100109	TFIP11	22	0	Euteleostomi	Euteleostomi
ENSG00000132286	TIMM10B	11	0	Euteleostomi	Euteleostomi
ENSG00000126768	TIMM17B	X	0	Euteleostomi	Euteleostomi
ENSG00000234224	TMEM229A	7	0	Euteleostomi	Euteleostomi
ENSG00000148483	TMEM236	10	0	Euteleostomi	Euteleostomi
ENSG00000145014	TMEM44	3	0	Euteleostomi	Euteleostomi
ENSG00000153214	TMEM87B	2	0	Euteleostomi	Euteleostomi
ENSG00000142046	TMEM91	19	0	Euteleostomi	Euteleostomi
ENSG00000164897	TMUB1	7	0	Euteleostomi	Euteleostomi
ENSG00000146826	TRAPPC14	7	0	Euteleostomi	Euteleostomi
ENSG00000110171	TRIM3	11	0	Euteleostomi	Euteleostomi
ENSG00000163462	TRIM46	1	0	Euteleostomi	Euteleostomi
ENSG00000125733	TRIP10	19	0	Euteleostomi	Euteleostomi
ENSG00000136932	TRMO	9	0	Euteleostomi	Euteleostomi
ENSG00000104907	TRMT1	19	0	Euteleostomi	Euteleostomi
ENSG00000072756	TRNT1	3	0	Euteleostomi	Euteleostomi
ENSG00000100154	TTC28	22	0	Euteleostomi	Euteleostomi
ENSG00000125482	TTF1	9	0	Euteleostomi	Euteleostomi
ENSG00000131462	TUBG1	17	0	Euteleostomi	Euteleostomi
ENSG00000184470	TXNRD2	22	0	Euteleostomi	Euteleostomi
ENSG00000277149	TYW1B	7	0	Euteleostomi	Euteleostomi
ENSG00000078967	UBE2D4	7	0	Euteleostomi	Euteleostomi
ENSG00000109424	UCP1	4	0	Euteleostomi	Euteleostomi
ENSG00000175567	UCP2	11	0	Euteleostomi	Euteleostomi
ENSG00000184076	UQCR10	22	0	Euteleostomi	Euteleostomi
ENSG00000167118	URM1	9	0	Euteleostomi	Euteleostomi
ENSG00000176542	USF3	3	0	Euteleostomi	Euteleostomi
ENSG00000118640	VAMP8	2	0	Euteleostomi	Euteleostomi
ENSG00000173218	VANGL1	1	0	Euteleostomi	Euteleostomi
ENSG00000101940	WDR13	X	0	Euteleostomi	Euteleostomi
ENSG00000227057	WDR46	6	0	Euteleostomi	Euteleostomi
ENSG00000196632	WNK3	X	0	Euteleostomi	Euteleostomi
ENSG00000100219	XBP1	22	0	Euteleostomi	Euteleostomi
ENSG00000006047	YBX2	17	0	Euteleostomi	Euteleostomi
ENSG00000174282	ZBTB4	17	0	Euteleostomi	Euteleostomi
ENSG00000188818	ZDHHC11	5	0	Euteleostomi	Euteleostomi
ENSG00000162300	ZFPL1	11	0	Euteleostomi	Euteleostomi
ENSG00000167625	ZNF526	19	0	Euteleostomi	Euteleostomi
ENSG00000106400	ZNHIT1	7	0	Euteleostomi	Euteleostomi
ENSG00000174276	ZNHIT2	11	0	Euteleostomi	Euteleostomi
ENSG00000173465	ZNRD2	11	0	Euteleostomi	Euteleostomi
ENSG00000183579	ZNRF3	22	0	Euteleostomi	Euteleostomi
ENSG00000000003	TSPAN6	X	0	Euteleostomi	Euteleostomi
ENSG00000000005	TNMD	X	0	Euteleostomi	Euteleostomi
ENSG00000000419	DPM1	20	0	Euteleostomi	Euteleostomi
ENSG00000000457	SCYL3	1	0	Euteleostomi	Euteleostomi
ENSG00000000460	C1orf112	1	0	Euteleostomi	Euteleostomi
ENSG00000000938	FGR	1	0	Euteleostomi	Euteleostomi
ENSG00000001036	FUCA2	6	0	Euteleostomi	Euteleostomi
ENSG00000001084	GCLC	6	0	Euteleostomi	Euteleostomi
ENSG00000001167	NFYA	6	0	Euteleostomi	Euteleostomi
ENSG00000001461	NIPAL3	1	0	Euteleostomi	Euteleostomi
ENSG00000001561	ENPP4	6	0	Euteleostomi	Euteleostomi
ENSG00000001617	SEMA3F	3	0	Euteleostomi	Euteleostomi
ENSG00000001626	CFTR	7	0	Euteleostomi	Euteleostomi
ENSG00000001629	ANKIB1	7	0	Euteleostomi	Euteleostomi
ENSG00000001630	CYP51A1	7	0	Euteleostomi	Euteleostomi
ENSG00000001631	KRIT1	7	0	Euteleostomi	Euteleostomi
ENSG00000002016	RAD52	12	0	Euteleostomi	Euteleostomi
ENSG00000002549	LAP3	4	0	Euteleostomi	Euteleostomi
ENSG00000002587	HS3ST1	4	0	Euteleostomi	Euteleostomi
ENSG00000002726	AOC1	7	0	Euteleostomi	Euteleostomi
ENSG00000002745	WNT16	7	0	Euteleostomi	Euteleostomi
ENSG00000002746	HECW1	7	0	Euteleostomi	Euteleostomi
ENSG00000002822	MAD1L1	7	0	Euteleostomi	Euteleostomi
ENSG00000002834	LASP1	17	0	Euteleostomi	Euteleostomi
ENSG00000002919	SNX11	17	0	Euteleostomi	Euteleostomi
ENSG00000003056	M6PR	12	0	Euteleostomi	Euteleostomi
ENSG00000003137	CYP26B1	2	0	Euteleostomi	Euteleostomi
ENSG00000003249	DBNDD1	16	0	Euteleostomi	Euteleostomi
ENSG00000003393	ALS2	2	0	Euteleostomi	Euteleostomi
ENSG00000003436	TFPI	2	0	Euteleostomi	Euteleostomi
ENSG00000003509	NDUFAF7	2	0	Euteleostomi	Euteleostomi
ENSG00000003756	RBM5	3	0	Euteleostomi	Euteleostomi
ENSG00000003987	MTMR7	8	0	Euteleostomi	Euteleostomi
ENSG00000003989	SLC7A2	8	0	Euteleostomi	Euteleostomi
ENSG00000004139	SARM1	17	0	Euteleostomi	Euteleostomi
ENSG00000004142	POLDIP2	17	0	Euteleostomi	Euteleostomi
ENSG00000004399	PLXND1	3	0	Euteleostomi	Euteleostomi
ENSG00000004455	AK2	1	0	Euteleostomi	Euteleostomi
ENSG00000004478	FKBP4	12	0	Euteleostomi	Euteleostomi
ENSG00000004487	KDM1A	1	0	Euteleostomi	Euteleostomi
ENSG00000004534	RBM6	3	0	Euteleostomi	Euteleostomi
ENSG00000004660	CAMKK1	17	0	Euteleostomi	Euteleostomi
ENSG00000004700	RECQL	12	0	Euteleostomi	Euteleostomi
ENSG00000004766	VPS50	7	0	Euteleostomi	Euteleostomi
ENSG00000004777	ARHGAP33	19	0	Euteleostomi	Euteleostomi
ENSG00000004779	NDUFAB1	16	0	Euteleostomi	Euteleostomi
ENSG00000004809	SLC22A16	6	0	Euteleostomi	Euteleostomi
ENSG00000004838	ZMYND10	3	0	Euteleostomi	Euteleostomi
ENSG00000004848	ARX	X	0	Euteleostomi	Euteleostomi
ENSG00000004864	SLC25A13	7	0	Euteleostomi	Euteleostomi
ENSG00000004866	ST7	7	0	Euteleostomi	Euteleostomi
ENSG00000004897	CDC27	17	0	Euteleostomi	Euteleostomi
ENSG00000004939	SLC4A1	17	0	Euteleostomi	Euteleostomi
ENSG00000004948	CALCR	7	0	Euteleostomi	Euteleostomi
ENSG00000005007	UPF1	19	0	Euteleostomi	Euteleostomi
ENSG00000005020	SKAP2	7	0	Euteleostomi	Euteleostomi
ENSG00000005022	SLC25A5	X	0	Euteleostomi	Euteleostomi
ENSG00000005059	MCUB	4	0	Euteleostomi	Euteleostomi
ENSG00000005073	HOXA11	7	0	Euteleostomi	Euteleostomi
ENSG00000005075	POLR2J	7	0	Euteleostomi	Euteleostomi
ENSG00000005100	DHX33	17	0	Euteleostomi	Euteleostomi
ENSG00000005102	MEOX1	17	0	Euteleostomi	Euteleostomi
ENSG00000005108	THSD7A	7	0	Euteleostomi	Euteleostomi
ENSG00000005156	LIG3	17	0	Euteleostomi	Euteleostomi
ENSG00000005175	RPAP3	12	0	Euteleostomi	Euteleostomi
ENSG00000005194	CIAPIN1	16	0	Euteleostomi	Euteleostomi
ENSG00000005206	SPPL2B	19	0	Euteleostomi	Euteleostomi
ENSG00000005249	PRKAR2B	7	0	Euteleostomi	Euteleostomi
ENSG00000005302	MSL3	X	0	Euteleostomi	Euteleostomi
ENSG00000005339	CREBBP	16	0	Euteleostomi	Euteleostomi
ENSG00000005436	GCFC2	2	0	Euteleostomi	Euteleostomi
ENSG00000005448	WDR54	2	0	Euteleostomi	Euteleostomi
ENSG00000005469	CROT	7	0	Euteleostomi	Euteleostomi
ENSG00000005471	ABCB4	7	0	Euteleostomi	Euteleostomi
ENSG00000005483	KMT2E	7	0	Euteleostomi	Euteleostomi
ENSG00000005513	SOX8	16	0	Euteleostomi	Euteleostomi
ENSG00000005700	IBTK	6	0	Euteleostomi	Euteleostomi
ENSG00000005810	MYCBP2	13	0	Euteleostomi	Euteleostomi
ENSG00000005812	FBXL3	13	0	Euteleostomi	Euteleostomi
ENSG00000005884	ITGA3	17	0	Euteleostomi	Euteleostomi
ENSG00000005889	ZFX	X	0	Euteleostomi	Euteleostomi
ENSG00000005893	LAMP2	X	0	Euteleostomi	Euteleostomi
ENSG00000005981	ASB4	7	0	Euteleostomi	Euteleostomi
ENSG00000006007	GDE1	16	0	Euteleostomi	Euteleostomi
ENSG00000006016	CRLF1	19	0	Euteleostomi	Euteleostomi
ENSG00000006025	OSBPL7	17	0	Euteleostomi	Euteleostomi
ENSG00000006042	TMEM98	17	0	Euteleostomi	Euteleostomi
ENSG00000006062	MAP3K14	17	0	Euteleostomi	Euteleostomi
ENSG00000006071	ABCC8	11	0	Euteleostomi	Euteleostomi
ENSG00000006116	CACNG3	16	0	Euteleostomi	Euteleostomi
ENSG00000006282	SPATA20	17	0	Euteleostomi	Euteleostomi
ENSG00000006283	CACNA1G	17	0	Euteleostomi	Euteleostomi
ENSG00000006377	DLX6	7	0	Euteleostomi	Euteleostomi
ENSG00000006432	MAP3K9	14	0	Euteleostomi	Euteleostomi
ENSG00000006451	RALA	7	0	Euteleostomi	Euteleostomi
ENSG00000006453	BAIAP2L1	7	0	Euteleostomi	Euteleostomi
ENSG00000006459	KDM7A	7	0	Euteleostomi	Euteleostomi
ENSG00000006468	ETV1	7	0	Euteleostomi	Euteleostomi
ENSG00000006530	AGK	7	0	Euteleostomi	Euteleostomi
ENSG00000006555	TTC22	1	0	Euteleostomi	Euteleostomi
ENSG00000006576	PHTF2	7	0	Euteleostomi	Euteleostomi
ENSG00000006607	FARP2	2	0	Euteleostomi	Euteleostomi
ENSG00000006611	USH1C	11	0	Euteleostomi	Euteleostomi
ENSG00000006625	GGCT	7	0	Euteleostomi	Euteleostomi
ENSG00000006638	TBXA2R	19	0	Euteleostomi	Euteleostomi
ENSG00000006652	IFRD1	7	0	Euteleostomi	Euteleostomi
ENSG00000006695	COX10	17	0	Euteleostomi	Euteleostomi
ENSG00000006704	GTF2IRD1	7	0	Euteleostomi	Euteleostomi
ENSG00000006712	PAF1	19	0	Euteleostomi	Euteleostomi
ENSG00000006715	VPS41	7	0	Euteleostomi	Euteleostomi
ENSG00000006740	ARHGAP44	17	0	Euteleostomi	Euteleostomi
ENSG00000006744	ELAC2	17	0	Euteleostomi	Euteleostomi
ENSG00000006756	ARSD	X	0	Euteleostomi	Euteleostomi
ENSG00000006788	MYH13	17	0	Euteleostomi	Euteleostomi
ENSG00000006831	ADIPOR2	12	0	Euteleostomi	Euteleostomi
ENSG00000007001	UPP2	2	0	Euteleostomi	Euteleostomi
ENSG00000007062	PROM1	4	0	Euteleostomi	Euteleostomi
ENSG00000007080	CCDC124	19	0	Euteleostomi	Euteleostomi
ENSG00000007168	PAFAH1B1	17	0	Euteleostomi	Euteleostomi
ENSG00000007174	DNAH9	17	0	Euteleostomi	Euteleostomi
ENSG00000007202	BLTP2	17	0	Euteleostomi	Euteleostomi
ENSG00000007216	SLC13A2	17	0	Euteleostomi	Euteleostomi
ENSG00000007237	GAS7	17	0	Euteleostomi	Euteleostomi
ENSG00000007264	MATK	19	0	Euteleostomi	Euteleostomi
ENSG00000007341	ST7L	1	0	Euteleostomi	Euteleostomi
ENSG00000007372	PAX6	11	0	Euteleostomi	Euteleostomi
ENSG00000007376	RPUSD1	16	0	Euteleostomi	Euteleostomi
ENSG00000007384	RHBDF1	16	0	Euteleostomi	Euteleostomi
ENSG00000007392	LUC7L	16	0	Euteleostomi	Euteleostomi
ENSG00000007402	CACNA2D2	3	0	Euteleostomi	Euteleostomi
ENSG00000007520	TSR3	16	0	Euteleostomi	Euteleostomi
ENSG00000007541	PIGQ	16	0	Euteleostomi	Euteleostomi
ENSG00000007545	CRAMP1	16	0	Euteleostomi	Euteleostomi
ENSG00000007866	TEAD3	6	0	Euteleostomi	Euteleostomi
ENSG00000007908	SELE	1	0	Euteleostomi	Euteleostomi
ENSG00000007923	DNAJC11	1	0	Euteleostomi	Euteleostomi
ENSG00000007944	MYLIP	6	0	Euteleostomi	Euteleostomi
ENSG00000007952	NOX1	X	0	Euteleostomi	Euteleostomi
ENSG00000007968	E2F2	1	0	Euteleostomi	Euteleostomi
ENSG00000008018	PSMB1	6	0	Euteleostomi	Euteleostomi
ENSG00000008083	JARID2	6	0	Euteleostomi	Euteleostomi
ENSG00000008086	CDKL5	X	0	Euteleostomi	Euteleostomi
ENSG00000008118	CAMK1G	1	0	Euteleostomi	Euteleostomi
ENSG00000008130	NADK	1	0	Euteleostomi	Euteleostomi
ENSG00000008196	TFAP2B	6	0	Euteleostomi	Euteleostomi
ENSG00000008197	TFAP2D	6	0	Euteleostomi	Euteleostomi
ENSG00000008226	DLEC1	3	0	Euteleostomi	Euteleostomi
ENSG00000008256	CYTH3	7	0	Euteleostomi	Euteleostomi
ENSG00000008277	ADAM22	7	0	Euteleostomi	Euteleostomi
ENSG00000008283	CYB561	17	0	Euteleostomi	Euteleostomi
ENSG00000008294	SPAG9	17	0	Euteleostomi	Euteleostomi
ENSG00000008300	CELSR3	3	0	Euteleostomi	Euteleostomi
ENSG00000008311	AASS	7	0	Euteleostomi	Euteleostomi
ENSG00000008382	MPND	19	0	Euteleostomi	Euteleostomi
ENSG00000008394	MGST1	12	0	Euteleostomi	Euteleostomi
ENSG00000008405	CRY1	12	0	Euteleostomi	Euteleostomi
ENSG00000008441	NFIX	19	0	Euteleostomi	Euteleostomi
ENSG00000008513	ST3GAL1	8	0	Euteleostomi	Euteleostomi
ENSG00000008710	PKD1	16	0	Euteleostomi	Euteleostomi
ENSG00000008735	MAPK8IP2	22	0	Euteleostomi	Euteleostomi
ENSG00000008838	MED24	17	0	Euteleostomi	Euteleostomi
ENSG00000008853	RHOBTB2	8	0	Euteleostomi	Euteleostomi
ENSG00000008869	HEATR5B	2	0	Euteleostomi	Euteleostomi
ENSG00000008952	SEC62	3	0	Euteleostomi	Euteleostomi
ENSG00000008988	RPS20	8	0	Euteleostomi	Euteleostomi
ENSG00000009307	CSDE1	1	0	Euteleostomi	Euteleostomi
ENSG00000009335	UBE3C	7	0	Euteleostomi	Euteleostomi
ENSG00000009413	REV3L	6	0	Euteleostomi	Euteleostomi
ENSG00000009709	PAX7	1	0	Euteleostomi	Euteleostomi
ENSG00000009724	MASP2	1	0	Euteleostomi	Euteleostomi
ENSG00000009765	IYD	6	0	Euteleostomi	Euteleostomi
ENSG00000009830	POMT2	14	0	Euteleostomi	Euteleostomi
ENSG00000009844	VTA1	6	0	Euteleostomi	Euteleostomi
ENSG00000009950	MLXIPL	7	0	Euteleostomi	Euteleostomi
ENSG00000009954	BAZ1B	7	0	Euteleostomi	Euteleostomi
ENSG00000010072	SPRTN	1	0	Euteleostomi	Euteleostomi
ENSG00000010165	METTL13	1	0	Euteleostomi	Euteleostomi
ENSG00000010219	DYRK4	12	0	Euteleostomi	Euteleostomi
ENSG00000010244	ZNF207	17	0	Euteleostomi	Euteleostomi
ENSG00000010256	UQCRC1	3	0	Euteleostomi	Euteleostomi
ENSG00000010278	CD9	12	0	Euteleostomi	Euteleostomi
ENSG00000010282	HHATL	3	0	Euteleostomi	Euteleostomi
ENSG00000010292	NCAPD2	12	0	Euteleostomi	Euteleostomi
ENSG00000010295	IFFO1	12	0	Euteleostomi	Euteleostomi
ENSG00000010319	SEMA3G	3	0	Euteleostomi	Euteleostomi
ENSG00000010322	NISCH	3	0	Euteleostomi	Euteleostomi
ENSG00000010327	STAB1	3	0	Euteleostomi	Euteleostomi
ENSG00000010379	SLC6A13	12	0	Euteleostomi	Euteleostomi
ENSG00000010404	IDS	X	0	Euteleostomi	Euteleostomi
ENSG00000010671	BTK	X	0	Euteleostomi	Euteleostomi
ENSG00000010803	SCMH1	1	0	Euteleostomi	Euteleostomi
ENSG00000010810	FYN	6	0	Euteleostomi	Euteleostomi
ENSG00000010818	HIVEP2	6	0	Euteleostomi	Euteleostomi
ENSG00000011007	ELOA	1	0	Euteleostomi	Euteleostomi
ENSG00000011009	LYPLA2	1	0	Euteleostomi	Euteleostomi
ENSG00000011021	CLCN6	1	0	Euteleostomi	Euteleostomi
ENSG00000011028	MRC2	17	0	Euteleostomi	Euteleostomi
ENSG00000011105	TSPAN9	12	0	Euteleostomi	Euteleostomi
ENSG00000011114	BTBD7	14	0	Euteleostomi	Euteleostomi
ENSG00000011132	APBA3	19	0	Euteleostomi	Euteleostomi
ENSG00000011143	MKS1	17	0	Euteleostomi	Euteleostomi
ENSG00000011198	ABHD5	3	0	Euteleostomi	Euteleostomi
ENSG00000011201	ANOS1	X	0	Euteleostomi	Euteleostomi
ENSG00000011258	MBTD1	17	0	Euteleostomi	Euteleostomi
ENSG00000011275	RNF216	7	0	Euteleostomi	Euteleostomi
ENSG00000011304	PTBP1	19	0	Euteleostomi	Euteleostomi
ENSG00000011332	DPF1	19	0	Euteleostomi	Euteleostomi
ENSG00000011347	SYT7	11	0	Euteleostomi	Euteleostomi
ENSG00000011376	LARS2	3	0	Euteleostomi	Euteleostomi
ENSG00000011405	PIK3C2A	11	0	Euteleostomi	Euteleostomi
ENSG00000011426	ANLN	7	0	Euteleostomi	Euteleostomi
ENSG00000011454	RABGAP1	9	0	Euteleostomi	Euteleostomi
ENSG00000011465	DCN	12	0	Euteleostomi	Euteleostomi
ENSG00000011478	QPCTL	19	0	Euteleostomi	Euteleostomi
ENSG00000011485	PPP5C	19	0	Euteleostomi	Euteleostomi
ENSG00000011523	CEP68	2	0	Euteleostomi	Euteleostomi
ENSG00000011566	MAP4K3	2	0	Euteleostomi	Euteleostomi
ENSG00000012171	SEMA3B	3	0	Euteleostomi	Euteleostomi
ENSG00000012174	MBTPS2	X	0	Euteleostomi	Euteleostomi
ENSG00000012232	EXTL3	8	0	Euteleostomi	Euteleostomi
ENSG00000012504	NR1H4	12	0	Euteleostomi	Euteleostomi
ENSG00000012660	ELOVL5	6	0	Euteleostomi	Euteleostomi
ENSG00000012779	ALOX5	10	0	Euteleostomi	Euteleostomi
ENSG00000012963	UBR7	14	0	Euteleostomi	Euteleostomi
ENSG00000012983	MAP4K5	14	0	Euteleostomi	Euteleostomi
ENSG00000013275	PSMC4	19	0	Euteleostomi	Euteleostomi
ENSG00000013288	MAN2B2	4	0	Euteleostomi	Euteleostomi
ENSG00000013293	SLC7A14	3	0	Euteleostomi	Euteleostomi
ENSG00000013297	CLDN11	3	0	Euteleostomi	Euteleostomi
ENSG00000013306	SLC25A39	17	0	Euteleostomi	Euteleostomi
ENSG00000013364	MVP	16	0	Euteleostomi	Euteleostomi
ENSG00000013375	PGM3	6	0	Euteleostomi	Euteleostomi
ENSG00000013441	CLK1	2	0	Euteleostomi	Euteleostomi
ENSG00000013503	POLR3B	12	0	Euteleostomi	Euteleostomi
ENSG00000013523	ANGEL1	14	0	Euteleostomi	Euteleostomi
ENSG00000013561	RNF14	5	0	Euteleostomi	Euteleostomi
ENSG00000013563	DNASE1L1	X	0	Euteleostomi	Euteleostomi
ENSG00000013810	TACC3	4	0	Euteleostomi	Euteleostomi
ENSG00000014123	UFL1	6	0	Euteleostomi	Euteleostomi
ENSG00000014138	POLA2	11	0	Euteleostomi	Euteleostomi
ENSG00000014164	ZC3H3	8	0	Euteleostomi	Euteleostomi
ENSG00000014216	CAPN1	11	0	Euteleostomi	Euteleostomi
ENSG00000014641	MDH1	2	0	Euteleostomi	Euteleostomi
ENSG00000014824	SLC30A9	4	0	Euteleostomi	Euteleostomi
ENSG00000014914	MTMR11	1	0	Euteleostomi	Euteleostomi
ENSG00000014919	COX15	10	0	Euteleostomi	Euteleostomi
ENSG00000015133	CCDC88C	14	0	Euteleostomi	Euteleostomi
ENSG00000015153	YAF2	12	0	Euteleostomi	Euteleostomi
ENSG00000015171	ZMYND11	10	0	Euteleostomi	Euteleostomi
ENSG00000015285	WAS	X	0	Euteleostomi	Euteleostomi
ENSG00000015413	DPEP1	16	0	Euteleostomi	Euteleostomi
ENSG00000015520	NPC1L1	7	0	Euteleostomi	Euteleostomi
ENSG00000015532	XYLT2	17	0	Euteleostomi	Euteleostomi
ENSG00000015592	STMN4	8	0	Euteleostomi	Euteleostomi
ENSG00000015676	NUDCD3	7	0	Euteleostomi	Euteleostomi
ENSG00000016082	ISL1	5	0	Euteleostomi	Euteleostomi
ENSG00000016391	CHDH	3	0	Euteleostomi	Euteleostomi
ENSG00000016864	GLT8D1	3	0	Euteleostomi	Euteleostomi
ENSG00000017260	ATP2C1	3	0	Euteleostomi	Euteleostomi
ENSG00000017427	IGF1	12	0	Euteleostomi	Euteleostomi
ENSG00000017797	RALBP1	18	0	Euteleostomi	Euteleostomi
ENSG00000018189	RUFY3	4	0	Euteleostomi	Euteleostomi
ENSG00000018510	AGPS	2	0	Euteleostomi	Euteleostomi
ENSG00000018625	ATP1A2	1	0	Euteleostomi	Euteleostomi
ENSG00000018699	TTC27	2	0	Euteleostomi	Euteleostomi
ENSG00000019144	PHLDB1	11	0	Euteleostomi	Euteleostomi
ENSG00000019186	CYP24A1	20	0	Euteleostomi	Euteleostomi
ENSG00000019485	PRDM11	11	0	Euteleostomi	Euteleostomi
ENSG00000019549	SNAI2	8	0	Euteleostomi	Euteleostomi
ENSG00000019582	CD74	5	0	Euteleostomi	Euteleostomi
ENSG00000019995	ZRANB1	10	0	Euteleostomi	Euteleostomi
ENSG00000020129	NCDN	1	0	Euteleostomi	Euteleostomi
ENSG00000020181	ADGRA2	8	0	Euteleostomi	Euteleostomi
ENSG00000020256	ZFP64	20	0	Euteleostomi	Euteleostomi
ENSG00000020426	MNAT1	14	0	Euteleostomi	Euteleostomi
ENSG00000020577	SAMD4A	14	0	Euteleostomi	Euteleostomi
ENSG00000020633	RUNX3	1	0	Euteleostomi	Euteleostomi
ENSG00000020922	MRE11	11	0	Euteleostomi	Euteleostomi
ENSG00000021355	SERPINB1	6	0	Euteleostomi	Euteleostomi
ENSG00000021488	SLC7A9	19	0	Euteleostomi	Euteleostomi
ENSG00000021574	SPAST	2	0	Euteleostomi	Euteleostomi
ENSG00000021762	OSBPL5	11	0	Euteleostomi	Euteleostomi
ENSG00000021776	AQR	15	0	Euteleostomi	Euteleostomi
ENSG00000021826	CPS1	2	0	Euteleostomi	Euteleostomi
ENSG00000021852	C8B	1	0	Euteleostomi	Euteleostomi
ENSG00000022267	FHL1	X	0	Euteleostomi	Euteleostomi
ENSG00000022277	RTF2	20	0	Euteleostomi	Euteleostomi
ENSG00000022355	GABRA1	5	0	Euteleostomi	Euteleostomi
ENSG00000022567	SLC45A4	8	0	Euteleostomi	Euteleostomi
ENSG00000022840	RNF10	12	0	Euteleostomi	Euteleostomi
ENSG00000022976	ZNF839	14	0	Euteleostomi	Euteleostomi
ENSG00000023041	ZDHHC6	10	0	Euteleostomi	Euteleostomi
ENSG00000023171	GRAMD1B	11	0	Euteleostomi	Euteleostomi
ENSG00000023228	NDUFS1	2	0	Euteleostomi	Euteleostomi
ENSG00000023287	RB1CC1	8	0	Euteleostomi	Euteleostomi
ENSG00000023318	ERP44	9	0	Euteleostomi	Euteleostomi
ENSG00000023330	ALAS1	3	0	Euteleostomi	Euteleostomi
ENSG00000023445	BIRC3	11	0	Euteleostomi	Euteleostomi
ENSG00000023516	AKAP11	13	0	Euteleostomi	Euteleostomi
ENSG00000023572	GLRX2	1	0	Euteleostomi	Euteleostomi
ENSG00000023697	DERA	12	0	Euteleostomi	Euteleostomi
ENSG00000023734	STRAP	12	0	Euteleostomi	Euteleostomi
ENSG00000023839	ABCC2	10	0	Euteleostomi	Euteleostomi
ENSG00000023892	DEF6	6	0	Euteleostomi	Euteleostomi
ENSG00000023902	PLEKHO1	1	0	Euteleostomi	Euteleostomi
ENSG00000023909	GCLM	1	0	Euteleostomi	Euteleostomi
ENSG00000024048	UBR2	6	0	Euteleostomi	Euteleostomi
ENSG00000024422	EHD2	19	0	Euteleostomi	Euteleostomi
ENSG00000024526	DEPDC1	1	0	Euteleostomi	Euteleostomi
ENSG00000025039	RRAGD	6	0	Euteleostomi	Euteleostomi
ENSG00000025156	HSF2	6	0	Euteleostomi	Euteleostomi
ENSG00000025293	PHF20	20	0	Euteleostomi	Euteleostomi
ENSG00000025434	NR1H3	11	0	Euteleostomi	Euteleostomi
ENSG00000025708	TYMP	22	0	Euteleostomi	Euteleostomi
ENSG00000025770	NCAPH2	22	0	Euteleostomi	Euteleostomi
ENSG00000025772	TOMM34	20	0	Euteleostomi	Euteleostomi
ENSG00000025796	SEC63	6	0	Euteleostomi	Euteleostomi
ENSG00000025800	KPNA6	1	0	Euteleostomi	Euteleostomi
ENSG00000026025	VIM	10	0	Euteleostomi	Euteleostomi
ENSG00000026559	KCNG1	20	0	Euteleostomi	Euteleostomi
ENSG00000026652	AGPAT4	6	0	Euteleostomi	Euteleostomi
ENSG00000027075	PRKCH	14	0	Euteleostomi	Euteleostomi
ENSG00000027847	B4GALT7	5	0	Euteleostomi	Euteleostomi
ENSG00000028203	VEZT	12	0	Euteleostomi	Euteleostomi
ENSG00000028277	POU2F2	19	0	Euteleostomi	Euteleostomi
ENSG00000028310	BRD9	5	0	Euteleostomi	Euteleostomi
ENSG00000028528	SNX1	15	0	Euteleostomi	Euteleostomi
ENSG00000028839	TBPL1	6	0	Euteleostomi	Euteleostomi
ENSG00000029153	BMAL2	12	0	Euteleostomi	Euteleostomi
ENSG00000029364	SLC39A9	14	0	Euteleostomi	Euteleostomi
ENSG00000029534	ANK1	8	0	Euteleostomi	Euteleostomi
ENSG00000029639	TFB1M	6	0	Euteleostomi	Euteleostomi
ENSG00000029725	RABEP1	17	0	Euteleostomi	Euteleostomi
ENSG00000030066	NUP160	11	0	Euteleostomi	Euteleostomi
ENSG00000030304	MUSK	9	0	Euteleostomi	Euteleostomi
ENSG00000030582	GRN	17	0	Euteleostomi	Euteleostomi
ENSG00000031003	FAM13B	5	0	Euteleostomi	Euteleostomi
ENSG00000031081	ARHGAP31	3	0	Euteleostomi	Euteleostomi
ENSG00000031698	SARS1	1	0	Euteleostomi	Euteleostomi
ENSG00000031823	RANBP3	19	0	Euteleostomi	Euteleostomi
ENSG00000032219	ARID4A	14	0	Euteleostomi	Euteleostomi
ENSG00000032389	EIPR1	2	0	Euteleostomi	Euteleostomi
ENSG00000032444	PNPLA6	19	0	Euteleostomi	Euteleostomi
ENSG00000032742	IFT88	13	0	Euteleostomi	Euteleostomi
ENSG00000033011	ALG1	16	0	Euteleostomi	Euteleostomi
ENSG00000033030	ZCCHC8	12	0	Euteleostomi	Euteleostomi
ENSG00000033050	ABCF2	7	0	Euteleostomi	Euteleostomi
ENSG00000033100	CHPF2	7	0	Euteleostomi	Euteleostomi
ENSG00000033122	LRRC7	1	0	Euteleostomi	Euteleostomi
ENSG00000033170	FUT8	14	0	Euteleostomi	Euteleostomi
ENSG00000033178	UBA6	4	0	Euteleostomi	Euteleostomi
ENSG00000033327	GAB2	11	0	Euteleostomi	Euteleostomi
ENSG00000033627	ATP6V0A1	17	0	Euteleostomi	Euteleostomi
ENSG00000033800	PIAS1	15	0	Euteleostomi	Euteleostomi
ENSG00000033867	SLC4A7	3	0	Euteleostomi	Euteleostomi
ENSG00000034053	APBA2	15	0	Euteleostomi	Euteleostomi
ENSG00000034152	MAP2K3	17	0	Euteleostomi	Euteleostomi
ENSG00000034533	ASTE1	3	0	Euteleostomi	Euteleostomi
ENSG00000034677	RNF19A	8	0	Euteleostomi	Euteleostomi
ENSG00000034693	PEX3	6	0	Euteleostomi	Euteleostomi
ENSG00000034713	GABARAPL2	16	0	Euteleostomi	Euteleostomi
ENSG00000034971	MYOC	1	0	Euteleostomi	Euteleostomi
ENSG00000035115	SH3YL1	2	0	Euteleostomi	Euteleostomi
ENSG00000035141	FAM136A	2	0	Euteleostomi	Euteleostomi
ENSG00000035403	VCL	10	0	Euteleostomi	Euteleostomi
ENSG00000035664	DAPK2	15	0	Euteleostomi	Euteleostomi
ENSG00000035681	NSMAF	8	0	Euteleostomi	Euteleostomi
ENSG00000035862	TIMP2	17	0	Euteleostomi	Euteleostomi
ENSG00000035928	RFC1	4	0	Euteleostomi	Euteleostomi
ENSG00000036054	TBC1D23	3	0	Euteleostomi	Euteleostomi
ENSG00000036257	CUL3	2	0	Euteleostomi	Euteleostomi
ENSG00000036448	MYOM2	8	0	Euteleostomi	Euteleostomi
ENSG00000036473	OTC	X	0	Euteleostomi	Euteleostomi
ENSG00000036549	ZZZ3	1	0	Euteleostomi	Euteleostomi
ENSG00000036672	USP2	11	0	Euteleostomi	Euteleostomi
ENSG00000036828	CASR	3	0	Euteleostomi	Euteleostomi
ENSG00000037280	FLT4	5	0	Euteleostomi	Euteleostomi
ENSG00000037474	NSUN2	5	0	Euteleostomi	Euteleostomi
ENSG00000037637	FBXO42	1	0	Euteleostomi	Euteleostomi
ENSG00000037749	MFAP3	5	0	Euteleostomi	Euteleostomi
ENSG00000037757	MRI1	19	0	Euteleostomi	Euteleostomi
ENSG00000037897	METTL1	12	0	Euteleostomi	Euteleostomi
ENSG00000037965	HOXC8	12	0	Euteleostomi	Euteleostomi
ENSG00000038002	AGA	4	0	Euteleostomi	Euteleostomi
ENSG00000038210	PI4K2B	4	0	Euteleostomi	Euteleostomi
ENSG00000038219	BOD1L1	4	0	Euteleostomi	Euteleostomi
ENSG00000038295	TLL1	4	0	Euteleostomi	Euteleostomi
ENSG00000038358	EDC4	16	0	Euteleostomi	Euteleostomi
ENSG00000038382	TRIO	5	0	Euteleostomi	Euteleostomi
ENSG00000038427	VCAN	5	0	Euteleostomi	Euteleostomi
ENSG00000038532	CLEC16A	16	0	Euteleostomi	Euteleostomi
ENSG00000039123	MTREX	5	0	Euteleostomi	Euteleostomi
ENSG00000039139	DNAH5	5	0	Euteleostomi	Euteleostomi
ENSG00000039319	ZFYVE16	5	0	Euteleostomi	Euteleostomi
ENSG00000039523	RIPOR1	16	0	Euteleostomi	Euteleostomi
ENSG00000039537	C6	5	0	Euteleostomi	Euteleostomi
ENSG00000039560	RAI14	5	0	Euteleostomi	Euteleostomi
ENSG00000039987	BEST2	19	0	Euteleostomi	Euteleostomi
ENSG00000040199	PHLPP2	16	0	Euteleostomi	Euteleostomi
ENSG00000040275	SPDL1	5	0	Euteleostomi	Euteleostomi
ENSG00000040341	STAU2	8	0	Euteleostomi	Euteleostomi
ENSG00000040487	SLC66A1	1	0	Euteleostomi	Euteleostomi
ENSG00000040608	RTN4R	22	0	Euteleostomi	Euteleostomi
ENSG00000040933	INPP4A	2	0	Euteleostomi	Euteleostomi
ENSG00000041353	RAB27B	18	0	Euteleostomi	Euteleostomi
ENSG00000041357	PSMA4	15	0	Euteleostomi	Euteleostomi
ENSG00000041515	MYO16	13	0	Euteleostomi	Euteleostomi
ENSG00000041802	LSG1	3	0	Euteleostomi	Euteleostomi
ENSG00000041880	PARP3	3	0	Euteleostomi	Euteleostomi
ENSG00000041982	TNC	9	0	Euteleostomi	Euteleostomi
ENSG00000042088	TDP1	14	0	Euteleostomi	Euteleostomi
ENSG00000042286	AIFM2	10	0	Euteleostomi	Euteleostomi
ENSG00000042317	SPATA7	14	0	Euteleostomi	Euteleostomi
ENSG00000042429	MED17	11	0	Euteleostomi	Euteleostomi
ENSG00000042445	RETSAT	2	0	Euteleostomi	Euteleostomi
ENSG00000042753	AP2S1	19	0	Euteleostomi	Euteleostomi
ENSG00000042781	USH2A	1	0	Euteleostomi	Euteleostomi
ENSG00000042832	TG	8	0	Euteleostomi	Euteleostomi
ENSG00000043039	BARX2	11	0	Euteleostomi	Euteleostomi
ENSG00000043143	JADE2	5	0	Euteleostomi	Euteleostomi
ENSG00000043355	ZIC2	13	0	Euteleostomi	Euteleostomi
ENSG00000043514	TRIT1	1	0	Euteleostomi	Euteleostomi
ENSG00000043591	ADRB1	10	0	Euteleostomi	Euteleostomi
ENSG00000044115	CTNNA1	5	0	Euteleostomi	Euteleostomi
ENSG00000044446	PHKA2	X	0	Euteleostomi	Euteleostomi
ENSG00000044459	CNTLN	9	0	Euteleostomi	Euteleostomi
ENSG00000044524	EPHA3	3	0	Euteleostomi	Euteleostomi
ENSG00000044574	HSPA5	9	0	Euteleostomi	Euteleostomi
ENSG00000046604	DSG2	18	0	Euteleostomi	Euteleostomi
ENSG00000046651	OFD1	X	0	Euteleostomi	Euteleostomi
ENSG00000046653	GPM6B	X	0	Euteleostomi	Euteleostomi
ENSG00000046889	PREX2	8	0	Euteleostomi	Euteleostomi
ENSG00000047056	WDR37	10	0	Euteleostomi	Euteleostomi
ENSG00000047188	YTHDC2	5	0	Euteleostomi	Euteleostomi
ENSG00000047249	ATP6V1H	8	0	Euteleostomi	Euteleostomi
ENSG00000047315	POLR2B	4	0	Euteleostomi	Euteleostomi
ENSG00000047346	ATOSA	15	0	Euteleostomi	Euteleostomi
ENSG00000047410	TPR	1	0	Euteleostomi	Euteleostomi
ENSG00000047457	CP	3	0	Euteleostomi	Euteleostomi
ENSG00000047578	KATNIP	16	0	Euteleostomi	Euteleostomi
ENSG00000047579	DTNBP1	6	0	Euteleostomi	Euteleostomi
ENSG00000047597	XK	X	0	Euteleostomi	Euteleostomi
ENSG00000047621	C12orf4	12	0	Euteleostomi	Euteleostomi
ENSG00000047644	WWC3	X	0	Euteleostomi	Euteleostomi
ENSG00000047648	ARHGAP6	X	0	Euteleostomi	Euteleostomi
ENSG00000047849	MAP4	3	0	Euteleostomi	Euteleostomi
ENSG00000047932	GOPC	6	0	Euteleostomi	Euteleostomi
ENSG00000048028	USP28	11	0	Euteleostomi	Euteleostomi
ENSG00000048052	HDAC9	7	0	Euteleostomi	Euteleostomi
ENSG00000048140	TSPAN17	5	0	Euteleostomi	Euteleostomi
ENSG00000048162	NOP16	5	0	Euteleostomi	Euteleostomi
ENSG00000048342	CC2D2A	4	0	Euteleostomi	Euteleostomi
ENSG00000048405	ZNF800	7	0	Euteleostomi	Euteleostomi
ENSG00000048471	SNX29	16	0	Euteleostomi	Euteleostomi
ENSG00000048540	LMO3	12	0	Euteleostomi	Euteleostomi
ENSG00000048544	MRPS10	6	0	Euteleostomi	Euteleostomi
ENSG00000048545	GUCA1A	6	0	Euteleostomi	Euteleostomi
ENSG00000048649	RSF1	11	0	Euteleostomi	Euteleostomi
ENSG00000048707	VPS13D	1	0	Euteleostomi	Euteleostomi
ENSG00000048740	CELF2	10	0	Euteleostomi	Euteleostomi
ENSG00000048991	R3HDM1	2	0	Euteleostomi	Euteleostomi
ENSG00000049089	COL9A2	1	0	Euteleostomi	Euteleostomi
ENSG00000049167	ERCC8	5	0	Euteleostomi	Euteleostomi
ENSG00000049192	ADAMTS6	5	0	Euteleostomi	Euteleostomi
ENSG00000049283	EPN3	17	0	Euteleostomi	Euteleostomi
ENSG00000049323	LTBP1	2	0	Euteleostomi	Euteleostomi
ENSG00000049449	RCN1	11	0	Euteleostomi	Euteleostomi
ENSG00000049541	RFC2	7	0	Euteleostomi	Euteleostomi
ENSG00000049618	ARID1B	6	0	Euteleostomi	Euteleostomi
ENSG00000049656	CLPTM1L	5	0	Euteleostomi	Euteleostomi
ENSG00000049759	NEDD4L	18	0	Euteleostomi	Euteleostomi
ENSG00000049860	HEXB	5	0	Euteleostomi	Euteleostomi
ENSG00000050030	NEXMIF	X	0	Euteleostomi	Euteleostomi
ENSG00000050130	JKAMP	14	0	Euteleostomi	Euteleostomi
ENSG00000050165	DKK3	11	0	Euteleostomi	Euteleostomi
ENSG00000050393	MCUR1	6	0	Euteleostomi	Euteleostomi
ENSG00000050405	LIMA1	12	0	Euteleostomi	Euteleostomi
ENSG00000050438	SLC4A8	12	0	Euteleostomi	Euteleostomi
ENSG00000050555	LAMC3	9	0	Euteleostomi	Euteleostomi
ENSG00000050628	PTGER3	1	0	Euteleostomi	Euteleostomi
ENSG00000050748	MAPK9	5	0	Euteleostomi	Euteleostomi
ENSG00000050820	BCAR1	16	0	Euteleostomi	Euteleostomi
ENSG00000051009	FHIP1B	11	0	Euteleostomi	Euteleostomi
ENSG00000051108	HERPUD1	16	0	Euteleostomi	Euteleostomi
ENSG00000051128	HOMER3	19	0	Euteleostomi	Euteleostomi
ENSG00000051180	RAD51	15	0	Euteleostomi	Euteleostomi
ENSG00000051341	POLQ	3	0	Euteleostomi	Euteleostomi
ENSG00000051382	PIK3CB	3	0	Euteleostomi	Euteleostomi
ENSG00000051523	CYBA	16	0	Euteleostomi	Euteleostomi
ENSG00000051596	THOC3	5	0	Euteleostomi	Euteleostomi
ENSG00000052126	PLEKHA5	12	0	Euteleostomi	Euteleostomi
ENSG00000052344	PRSS8	16	0	Euteleostomi	Euteleostomi
ENSG00000052723	SIKE1	1	0	Euteleostomi	Euteleostomi
ENSG00000052749	RRP12	10	0	Euteleostomi	Euteleostomi
ENSG00000052802	MSMO1	4	0	Euteleostomi	Euteleostomi
ENSG00000052841	TTC17	11	0	Euteleostomi	Euteleostomi
ENSG00000052850	ALX4	11	0	Euteleostomi	Euteleostomi
ENSG00000053108	FSTL4	5	0	Euteleostomi	Euteleostomi
ENSG00000053254	FOXN3	14	0	Euteleostomi	Euteleostomi
ENSG00000053328	METTL24	6	0	Euteleostomi	Euteleostomi
ENSG00000053372	MRTO4	1	0	Euteleostomi	Euteleostomi
ENSG00000053501	USE1	19	0	Euteleostomi	Euteleostomi
ENSG00000053524	MCF2L2	3	0	Euteleostomi	Euteleostomi
ENSG00000053702	NRIP2	12	0	Euteleostomi	Euteleostomi
ENSG00000053770	AP5M1	14	0	Euteleostomi	Euteleostomi
ENSG00000053900	ANAPC4	4	0	Euteleostomi	Euteleostomi
ENSG00000053918	KCNQ1	11	0	Euteleostomi	Euteleostomi
ENSG00000054116	TRAPPC3	1	0	Euteleostomi	Euteleostomi
ENSG00000054118	THRAP3	1	0	Euteleostomi	Euteleostomi
ENSG00000054148	PHPT1	9	0	Euteleostomi	Euteleostomi
ENSG00000054179	ENTPD2	9	0	Euteleostomi	Euteleostomi
ENSG00000054267	ARID4B	1	0	Euteleostomi	Euteleostomi
ENSG00000054277	OPN3	1	0	Euteleostomi	Euteleostomi
ENSG00000054282	SDCCAG8	1	0	Euteleostomi	Euteleostomi
ENSG00000054356	PTPRN	2	0	Euteleostomi	Euteleostomi
ENSG00000054392	HHAT	1	0	Euteleostomi	Euteleostomi
ENSG00000054523	KIF1B	1	0	Euteleostomi	Euteleostomi
ENSG00000054598	FOXC1	6	0	Euteleostomi	Euteleostomi
ENSG00000054611	TBC1D22A	22	0	Euteleostomi	Euteleostomi
ENSG00000054654	SYNE2	14	0	Euteleostomi	Euteleostomi
ENSG00000054690	PLEKHH1	14	0	Euteleostomi	Euteleostomi
ENSG00000054793	ATP9A	20	0	Euteleostomi	Euteleostomi
ENSG00000054803	CBLN4	20	0	Euteleostomi	Euteleostomi
ENSG00000054938	CHRDL2	11	0	Euteleostomi	Euteleostomi
ENSG00000054965	FAM168A	11	0	Euteleostomi	Euteleostomi
ENSG00000054967	RELT	11	0	Euteleostomi	Euteleostomi
ENSG00000054983	GALC	14	0	Euteleostomi	Euteleostomi
ENSG00000055044	NOP58	2	0	Euteleostomi	Euteleostomi
ENSG00000055070	SZRD1	1	0	Euteleostomi	Euteleostomi
ENSG00000055118	KCNH2	7	0	Euteleostomi	Euteleostomi
ENSG00000055130	CUL1	7	0	Euteleostomi	Euteleostomi
ENSG00000055147	FAM114A2	5	0	Euteleostomi	Euteleostomi
ENSG00000055163	CYFIP2	5	0	Euteleostomi	Euteleostomi
ENSG00000055208	TAB2	6	0	Euteleostomi	Euteleostomi
ENSG00000055483	USP36	17	0	Euteleostomi	Euteleostomi
ENSG00000055609	KMT2C	7	0	Euteleostomi	Euteleostomi
ENSG00000055732	MCOLN3	1	0	Euteleostomi	Euteleostomi
ENSG00000055813	CCDC85A	2	0	Euteleostomi	Euteleostomi
ENSG00000055917	PUM2	2	0	Euteleostomi	Euteleostomi
ENSG00000055950	MRPL43	10	0	Euteleostomi	Euteleostomi
ENSG00000056097	ZFR	5	0	Euteleostomi	Euteleostomi
ENSG00000056291	NPFFR2	4	0	Euteleostomi	Euteleostomi
ENSG00000056487	PHF21B	22	0	Euteleostomi	Euteleostomi
ENSG00000056586	RC3H2	9	0	Euteleostomi	Euteleostomi
ENSG00000057019	DCBLD2	3	0	Euteleostomi	Euteleostomi
ENSG00000057252	SOAT1	1	0	Euteleostomi	Euteleostomi
ENSG00000057468	MSH4	1	0	Euteleostomi	Euteleostomi
ENSG00000057593	F7	13	0	Euteleostomi	Euteleostomi
ENSG00000057608	GDI2	10	0	Euteleostomi	Euteleostomi
ENSG00000057657	PRDM1	6	0	Euteleostomi	Euteleostomi
ENSG00000057663	ATG5	6	0	Euteleostomi	Euteleostomi
ENSG00000057704	TMCC3	12	0	Euteleostomi	Euteleostomi
ENSG00000057757	PITHD1	1	0	Euteleostomi	Euteleostomi
ENSG00000058056	USP13	3	0	Euteleostomi	Euteleostomi
ENSG00000058063	ATP11B	3	0	Euteleostomi	Euteleostomi
ENSG00000058085	LAMC2	1	0	Euteleostomi	Euteleostomi
ENSG00000058091	CDK14	7	0	Euteleostomi	Euteleostomi
ENSG00000058262	SEC61A1	3	0	Euteleostomi	Euteleostomi
ENSG00000058272	PPP1R12A	12	0	Euteleostomi	Euteleostomi
ENSG00000058335	RASGRF1	15	0	Euteleostomi	Euteleostomi
ENSG00000058404	CAMK2B	7	0	Euteleostomi	Euteleostomi
ENSG00000058453	CROCC	1	0	Euteleostomi	Euteleostomi
ENSG00000058600	POLR3E	16	0	Euteleostomi	Euteleostomi
ENSG00000058729	RIOK2	5	0	Euteleostomi	Euteleostomi
ENSG00000058804	NDC1	1	0	Euteleostomi	Euteleostomi
ENSG00000058866	DGKG	3	0	Euteleostomi	Euteleostomi
ENSG00000059377	TBXAS1	7	0	Euteleostomi	Euteleostomi
ENSG00000059378	PARP12	7	0	Euteleostomi	Euteleostomi
ENSG00000059573	ALDH18A1	10	0	Euteleostomi	Euteleostomi
ENSG00000059588	TARBP1	1	0	Euteleostomi	Euteleostomi
ENSG00000059691	GATB	4	0	Euteleostomi	Euteleostomi
ENSG00000059728	MXD1	2	0	Euteleostomi	Euteleostomi
ENSG00000059758	CDK17	12	0	Euteleostomi	Euteleostomi
ENSG00000059769	DNAJC25	9	0	Euteleostomi	Euteleostomi
ENSG00000059915	PSD	10	0	Euteleostomi	Euteleostomi
ENSG00000060069	CTDP1	18	0	Euteleostomi	Euteleostomi
ENSG00000060237	WNK1	12	0	Euteleostomi	Euteleostomi
ENSG00000060339	CCAR1	10	0	Euteleostomi	Euteleostomi
ENSG00000060491	OGFR	20	0	Euteleostomi	Euteleostomi
ENSG00000060566	CREB3L3	19	0	Euteleostomi	Euteleostomi
ENSG00000060642	PIGV	1	0	Euteleostomi	Euteleostomi
ENSG00000060656	PTPRU	1	0	Euteleostomi	Euteleostomi
ENSG00000060688	SNRNP40	1	0	Euteleostomi	Euteleostomi
ENSG00000060709	RIMBP2	12	0	Euteleostomi	Euteleostomi
ENSG00000060718	COL11A1	1	0	Euteleostomi	Euteleostomi
ENSG00000060749	QSER1	11	0	Euteleostomi	Euteleostomi
ENSG00000060762	MPC1	6	0	Euteleostomi	Euteleostomi
ENSG00000060971	ACAA1	3	0	Euteleostomi	Euteleostomi
ENSG00000061273	HDAC7	12	0	Euteleostomi	Euteleostomi
ENSG00000061337	LZTS1	8	0	Euteleostomi	Euteleostomi
ENSG00000061455	PRDM6	5	0	Euteleostomi	Euteleostomi
ENSG00000061492	WNT8A	5	0	Euteleostomi	Euteleostomi
ENSG00000061676	NCKAP1	2	0	Euteleostomi	Euteleostomi
ENSG00000061918	GUCY1B1	4	0	Euteleostomi	Euteleostomi
ENSG00000061936	SFSWAP	12	0	Euteleostomi	Euteleostomi
ENSG00000061938	TNK2	3	0	Euteleostomi	Euteleostomi
ENSG00000061987	MON2	12	0	Euteleostomi	Euteleostomi
ENSG00000062282	DGAT2	11	0	Euteleostomi	Euteleostomi
ENSG00000062485	CS	12	0	Euteleostomi	Euteleostomi
ENSG00000062524	LTK	15	0	Euteleostomi	Euteleostomi
ENSG00000062598	ELMO2	20	0	Euteleostomi	Euteleostomi
ENSG00000062650	WAPL	10	0	Euteleostomi	Euteleostomi
ENSG00000062716	VMP1	17	0	Euteleostomi	Euteleostomi
ENSG00000062725	APPBP2	17	0	Euteleostomi	Euteleostomi
ENSG00000062822	POLD1	19	0	Euteleostomi	Euteleostomi
ENSG00000063015	SEZ6	17	0	Euteleostomi	Euteleostomi
ENSG00000063046	EIF4B	12	0	Euteleostomi	Euteleostomi
ENSG00000063169	BICRA	19	0	Euteleostomi	Euteleostomi
ENSG00000063176	SPHK2	19	0	Euteleostomi	Euteleostomi
ENSG00000063177	RPL18	19	0	Euteleostomi	Euteleostomi
ENSG00000063241	ISOC2	19	0	Euteleostomi	Euteleostomi
ENSG00000063244	U2AF2	19	0	Euteleostomi	Euteleostomi
ENSG00000063322	MED29	19	0	Euteleostomi	Euteleostomi
ENSG00000063438	AHRR	5	0	Euteleostomi	Euteleostomi
ENSG00000063515	GSC2	22	0	Euteleostomi	Euteleostomi
ENSG00000063601	MTMR1	X	0	Euteleostomi	Euteleostomi
ENSG00000063660	GPC1	2	0	Euteleostomi	Euteleostomi
ENSG00000063761	ADCK1	14	0	Euteleostomi	Euteleostomi
ENSG00000063854	HAGH	16	0	Euteleostomi	Euteleostomi
ENSG00000064012	CASP8	2	0	Euteleostomi	Euteleostomi
ENSG00000064042	LIMCH1	4	0	Euteleostomi	Euteleostomi
ENSG00000064102	INTS13	12	0	Euteleostomi	Euteleostomi
ENSG00000064115	TM7SF3	12	0	Euteleostomi	Euteleostomi
ENSG00000064195	DLX3	17	0	Euteleostomi	Euteleostomi
ENSG00000064218	DMRT3	9	0	Euteleostomi	Euteleostomi
ENSG00000064309	CDON	11	0	Euteleostomi	Euteleostomi
ENSG00000064313	TAF2	8	0	Euteleostomi	Euteleostomi
ENSG00000064393	HIPK2	7	0	Euteleostomi	Euteleostomi
ENSG00000064419	TNPO3	7	0	Euteleostomi	Euteleostomi
ENSG00000064489	BORCS8-MEF2B	19	0	Euteleostomi	Euteleostomi
ENSG00000064490	RFXANK	19	0	Euteleostomi	Euteleostomi
ENSG00000064545	TMEM161A	19	0	Euteleostomi	Euteleostomi
ENSG00000064601	CTSA	20	0	Euteleostomi	Euteleostomi
ENSG00000064651	SLC12A2	5	0	Euteleostomi	Euteleostomi
ENSG00000064687	ABCA7	19	0	Euteleostomi	Euteleostomi
ENSG00000064692	SNCAIP	5	0	Euteleostomi	Euteleostomi
ENSG00000064726	BTBD1	15	0	Euteleostomi	Euteleostomi
ENSG00000064835	POU1F1	3	0	Euteleostomi	Euteleostomi
ENSG00000064932	SBNO2	19	0	Euteleostomi	Euteleostomi
ENSG00000064933	PMS1	2	0	Euteleostomi	Euteleostomi
ENSG00000064989	CALCRL	2	0	Euteleostomi	Euteleostomi
ENSG00000064995	TAF11	6	0	Euteleostomi	Euteleostomi
ENSG00000064999	ANKS1A	6	0	Euteleostomi	Euteleostomi
ENSG00000065000	AP3D1	19	0	Euteleostomi	Euteleostomi
ENSG00000065054	NHERF2	16	0	Euteleostomi	Euteleostomi
ENSG00000065057	NTHL1	16	0	Euteleostomi	Euteleostomi
ENSG00000065060	BLTP3A	6	0	Euteleostomi	Euteleostomi
ENSG00000065150	IPO5	13	0	Euteleostomi	Euteleostomi
ENSG00000065183	WDR3	1	0	Euteleostomi	Euteleostomi
ENSG00000065243	PKN2	1	0	Euteleostomi	Euteleostomi
ENSG00000065268	WDR18	19	0	Euteleostomi	Euteleostomi
ENSG00000065308	TRAM2	6	0	Euteleostomi	Euteleostomi
ENSG00000065320	NTN1	17	0	Euteleostomi	Euteleostomi
ENSG00000065325	GLP2R	17	0	Euteleostomi	Euteleostomi
ENSG00000065328	MCM10	10	0	Euteleostomi	Euteleostomi
ENSG00000065357	DGKA	12	0	Euteleostomi	Euteleostomi
ENSG00000065361	ERBB3	12	0	Euteleostomi	Euteleostomi
ENSG00000065427	KARS1	16	0	Euteleostomi	Euteleostomi
ENSG00000065457	ADAT1	16	0	Euteleostomi	Euteleostomi
ENSG00000065485	PDIA5	3	0	Euteleostomi	Euteleostomi
ENSG00000065491	TBC1D22B	6	0	Euteleostomi	Euteleostomi
ENSG00000065526	SPEN	1	0	Euteleostomi	Euteleostomi
ENSG00000065534	MYLK	3	0	Euteleostomi	Euteleostomi
ENSG00000065548	ZC3H15	2	0	Euteleostomi	Euteleostomi
ENSG00000065600	PACC1	1	0	Euteleostomi	Euteleostomi
ENSG00000065609	SNAP91	6	0	Euteleostomi	Euteleostomi
ENSG00000065613	SLK	10	0	Euteleostomi	Euteleostomi
ENSG00000065615	CYB5R4	6	0	Euteleostomi	Euteleostomi
ENSG00000065618	COL17A1	10	0	Euteleostomi	Euteleostomi
ENSG00000065717	TLE2	19	0	Euteleostomi	Euteleostomi
ENSG00000065802	ASB1	2	0	Euteleostomi	Euteleostomi
ENSG00000065809	FAM107B	10	0	Euteleostomi	Euteleostomi
ENSG00000065882	TBC1D1	4	0	Euteleostomi	Euteleostomi
ENSG00000065911	MTHFD2	2	0	Euteleostomi	Euteleostomi
ENSG00000065923	SLC9A7	X	0	Euteleostomi	Euteleostomi
ENSG00000065978	YBX1	1	0	Euteleostomi	Euteleostomi
ENSG00000065989	PDE4A	19	0	Euteleostomi	Euteleostomi
ENSG00000066027	PPP2R5A	1	0	Euteleostomi	Euteleostomi
ENSG00000066032	CTNNA2	2	0	Euteleostomi	Euteleostomi
ENSG00000066044	ELAVL1	19	0	Euteleostomi	Euteleostomi
ENSG00000066056	TIE1	1	0	Euteleostomi	Euteleostomi
ENSG00000066084	DIP2B	12	0	Euteleostomi	Euteleostomi
ENSG00000066117	SMARCD1	12	0	Euteleostomi	Euteleostomi
ENSG00000066135	KDM4A	1	0	Euteleostomi	Euteleostomi
ENSG00000066136	NFYC	1	0	Euteleostomi	Euteleostomi
ENSG00000066185	ZMYND12	1	0	Euteleostomi	Euteleostomi
ENSG00000066230	SLC9A3	5	0	Euteleostomi	Euteleostomi
ENSG00000066248	NGEF	2	0	Euteleostomi	Euteleostomi
ENSG00000066279	ASPM	1	0	Euteleostomi	Euteleostomi
ENSG00000066322	ELOVL1	1	0	Euteleostomi	Euteleostomi
ENSG00000066336	SPI1	11	0	Euteleostomi	Euteleostomi
ENSG00000066379	POLR1H	6	0	Euteleostomi	Euteleostomi
ENSG00000066382	MPPED2	11	0	Euteleostomi	Euteleostomi
ENSG00000066422	ZBTB11	3	0	Euteleostomi	Euteleostomi
ENSG00000066427	ATXN3	14	0	Euteleostomi	Euteleostomi
ENSG00000066455	GOLGA5	14	0	Euteleostomi	Euteleostomi
ENSG00000066468	FGFR2	10	0	Euteleostomi	Euteleostomi
ENSG00000066557	LRRC40	1	0	Euteleostomi	Euteleostomi
ENSG00000066629	EML1	14	0	Euteleostomi	Euteleostomi
ENSG00000066651	TRMT11	6	0	Euteleostomi	Euteleostomi
ENSG00000066654	THUMPD1	16	0	Euteleostomi	Euteleostomi
ENSG00000066735	KIF26A	14	0	Euteleostomi	Euteleostomi
ENSG00000066739	ATG2B	14	0	Euteleostomi	Euteleostomi
ENSG00000066777	ARFGEF1	8	0	Euteleostomi	Euteleostomi
ENSG00000066827	ZFAT	8	0	Euteleostomi	Euteleostomi
ENSG00000066855	MTFR1	8	0	Euteleostomi	Euteleostomi
ENSG00000066926	FECH	18	0	Euteleostomi	Euteleostomi
ENSG00000066933	MYO9A	15	0	Euteleostomi	Euteleostomi
ENSG00000067057	PFKP	10	0	Euteleostomi	Euteleostomi
ENSG00000067082	KLF6	10	0	Euteleostomi	Euteleostomi
ENSG00000067113	PLPP1	5	0	Euteleostomi	Euteleostomi
ENSG00000067141	NEO1	15	0	Euteleostomi	Euteleostomi
ENSG00000067167	TRAM1	8	0	Euteleostomi	Euteleostomi
ENSG00000067191	CACNB1	17	0	Euteleostomi	Euteleostomi
ENSG00000067208	EVI5	1	0	Euteleostomi	Euteleostomi
ENSG00000067221	STOML1	15	0	Euteleostomi	Euteleostomi
ENSG00000067225	PKM	15	0	Euteleostomi	Euteleostomi
ENSG00000067248	DHX29	5	0	Euteleostomi	Euteleostomi
ENSG00000067334	DNTTIP2	1	0	Euteleostomi	Euteleostomi
ENSG00000067365	METTL22	16	0	Euteleostomi	Euteleostomi
ENSG00000067369	TP53BP1	15	0	Euteleostomi	Euteleostomi
ENSG00000067533	RRP15	1	0	Euteleostomi	Euteleostomi
ENSG00000067596	DHX8	17	0	Euteleostomi	Euteleostomi
ENSG00000067606	PRKCZ	1	0	Euteleostomi	Euteleostomi
ENSG00000067704	IARS2	1	0	Euteleostomi	Euteleostomi
ENSG00000067715	SYT1	12	0	Euteleostomi	Euteleostomi
ENSG00000067798	NAV3	12	0	Euteleostomi	Euteleostomi
ENSG00000067829	IDH3G	X	0	Euteleostomi	Euteleostomi
ENSG00000067836	ROGDI	16	0	Euteleostomi	Euteleostomi
ENSG00000067840	PDZD4	X	0	Euteleostomi	Euteleostomi
ENSG00000067842	ATP2B3	X	0	Euteleostomi	Euteleostomi
ENSG00000067900	ROCK1	18	0	Euteleostomi	Euteleostomi
ENSG00000067955	CBFB	16	0	Euteleostomi	Euteleostomi
ENSG00000067992	PDK3	X	0	Euteleostomi	Euteleostomi
ENSG00000068001	HYAL2	3	0	Euteleostomi	Euteleostomi
ENSG00000068024	HDAC4	2	0	Euteleostomi	Euteleostomi
ENSG00000068028	RASSF1	3	0	Euteleostomi	Euteleostomi
ENSG00000068078	FGFR3	4	0	Euteleostomi	Euteleostomi
ENSG00000068097	HEATR6	17	0	Euteleostomi	Euteleostomi
ENSG00000068120	COASY	17	0	Euteleostomi	Euteleostomi
ENSG00000068137	PLEKHH3	17	0	Euteleostomi	Euteleostomi
ENSG00000068305	MEF2A	15	0	Euteleostomi	Euteleostomi
ENSG00000068308	OTUD5	X	0	Euteleostomi	Euteleostomi
ENSG00000068354	TBC1D25	X	0	Euteleostomi	Euteleostomi
ENSG00000068366	ACSL4	X	0	Euteleostomi	Euteleostomi
ENSG00000068383	INPP5A	10	0	Euteleostomi	Euteleostomi
ENSG00000068394	GPKOW	X	0	Euteleostomi	Euteleostomi
ENSG00000068400	GRIPAP1	X	0	Euteleostomi	Euteleostomi
ENSG00000068650	ATP11A	13	0	Euteleostomi	Euteleostomi
ENSG00000068654	POLR1A	2	0	Euteleostomi	Euteleostomi
ENSG00000068697	LAPTM4A	2	0	Euteleostomi	Euteleostomi
ENSG00000068724	TTC7A	2	0	Euteleostomi	Euteleostomi
ENSG00000068781	STON1-GTF2A1L	2	0	Euteleostomi	Euteleostomi
ENSG00000068784	SRBD1	2	0	Euteleostomi	Euteleostomi
ENSG00000068796	KIF2A	5	0	Euteleostomi	Euteleostomi
ENSG00000068831	RASGRP2	11	0	Euteleostomi	Euteleostomi
ENSG00000068878	PSME4	2	0	Euteleostomi	Euteleostomi
ENSG00000068885	IFT80	3	0	Euteleostomi	Euteleostomi
ENSG00000068903	SIRT2	19	0	Euteleostomi	Euteleostomi
ENSG00000068912	ERLEC1	2	0	Euteleostomi	Euteleostomi
ENSG00000068976	PYGM	11	0	Euteleostomi	Euteleostomi
ENSG00000069011	PITX1	5	0	Euteleostomi	Euteleostomi
ENSG00000069018	TRPC7	5	0	Euteleostomi	Euteleostomi
ENSG00000069020	MAST4	5	0	Euteleostomi	Euteleostomi
ENSG00000069122	ADGRF5	6	0	Euteleostomi	Euteleostomi
ENSG00000069188	SDK2	17	0	Euteleostomi	Euteleostomi
ENSG00000069275	NUCKS1	1	0	Euteleostomi	Euteleostomi
ENSG00000069329	VPS35	16	0	Euteleostomi	Euteleostomi
ENSG00000069345	DNAJA2	16	0	Euteleostomi	Euteleostomi
ENSG00000069399	BCL3	19	0	Euteleostomi	Euteleostomi
ENSG00000069424	KCNAB2	1	0	Euteleostomi	Euteleostomi
ENSG00000069509	FUNDC1	X	0	Euteleostomi	Euteleostomi
ENSG00000069535	MAOB	X	0	Euteleostomi	Euteleostomi
ENSG00000069667	RORA	15	0	Euteleostomi	Euteleostomi
ENSG00000069696	DRD4	11	0	Euteleostomi	Euteleostomi
ENSG00000069702	TGFBR3	1	0	Euteleostomi	Euteleostomi
ENSG00000069869	NEDD4	15	0	Euteleostomi	Euteleostomi
ENSG00000069943	PIGB	15	0	Euteleostomi	Euteleostomi
ENSG00000069956	MAPK6	15	0	Euteleostomi	Euteleostomi
ENSG00000069966	GNB5	15	0	Euteleostomi	Euteleostomi
ENSG00000069974	RAB27A	15	0	Euteleostomi	Euteleostomi
ENSG00000069998	HDHD5	22	0	Euteleostomi	Euteleostomi
ENSG00000070010	UFD1	22	0	Euteleostomi	Euteleostomi
ENSG00000070018	LRP6	12	0	Euteleostomi	Euteleostomi
ENSG00000070019	GUCY2C	12	0	Euteleostomi	Euteleostomi
ENSG00000070047	PHRF1	11	0	Euteleostomi	Euteleostomi
ENSG00000070061	ELP1	9	0	Euteleostomi	Euteleostomi
ENSG00000070081	NUCB2	11	0	Euteleostomi	Euteleostomi
ENSG00000070087	PFN2	3	0	Euteleostomi	Euteleostomi
ENSG00000070159	PTPN3	9	0	Euteleostomi	Euteleostomi
ENSG00000070190	DAPP1	4	0	Euteleostomi	Euteleostomi
ENSG00000070193	FGF10	5	0	Euteleostomi	Euteleostomi
ENSG00000070214	SLC44A1	9	0	Euteleostomi	Euteleostomi
ENSG00000070269	TMEM260	14	0	Euteleostomi	Euteleostomi
ENSG00000070366	SMG6	17	0	Euteleostomi	Euteleostomi
ENSG00000070367	EXOC5	14	0	Euteleostomi	Euteleostomi
ENSG00000070371	CLTCL1	22	0	Euteleostomi	Euteleostomi
ENSG00000070388	FGF22	19	0	Euteleostomi	Euteleostomi
ENSG00000070404	FSTL3	19	0	Euteleostomi	Euteleostomi
ENSG00000070413	DGCR2	22	0	Euteleostomi	Euteleostomi
ENSG00000070423	RNF126	19	0	Euteleostomi	Euteleostomi
ENSG00000070444	MNT	17	0	Euteleostomi	Euteleostomi
ENSG00000070495	JMJD6	17	0	Euteleostomi	Euteleostomi
ENSG00000070501	POLB	8	0	Euteleostomi	Euteleostomi
ENSG00000070526	ST6GALNAC1	17	0	Euteleostomi	Euteleostomi
ENSG00000070540	WIPI1	17	0	Euteleostomi	Euteleostomi
ENSG00000070601	FRMPD1	9	0	Euteleostomi	Euteleostomi
ENSG00000070610	GBA2	9	0	Euteleostomi	Euteleostomi
ENSG00000070614	NDST1	5	0	Euteleostomi	Euteleostomi
ENSG00000070718	AP3M2	8	0	Euteleostomi	Euteleostomi
ENSG00000070729	CNGB1	16	0	Euteleostomi	Euteleostomi
ENSG00000070748	CHAT	10	0	Euteleostomi	Euteleostomi
ENSG00000070756	PABPC1	8	0	Euteleostomi	Euteleostomi
ENSG00000070761	CFAP20	16	0	Euteleostomi	Euteleostomi
ENSG00000070770	CSNK2A2	16	0	Euteleostomi	Euteleostomi
ENSG00000070778	PTPN21	14	0	Euteleostomi	Euteleostomi
ENSG00000070785	EIF2B3	1	0	Euteleostomi	Euteleostomi
ENSG00000070831	CDC42	1	0	Euteleostomi	Euteleostomi
ENSG00000070882	OSBPL3	7	0	Euteleostomi	Euteleostomi
ENSG00000070886	EPHA8	1	0	Euteleostomi	Euteleostomi
ENSG00000070915	SLC12A3	16	0	Euteleostomi	Euteleostomi
ENSG00000070950	RAD18	3	0	Euteleostomi	Euteleostomi
ENSG00000070961	ATP2B1	12	0	Euteleostomi	Euteleostomi
ENSG00000070985	TRPM5	11	0	Euteleostomi	Euteleostomi
ENSG00000071051	NCK2	2	0	Euteleostomi	Euteleostomi
ENSG00000071054	MAP4K4	2	0	Euteleostomi	Euteleostomi
ENSG00000071073	MGAT4A	2	0	Euteleostomi	Euteleostomi
ENSG00000071127	WDR1	4	0	Euteleostomi	Euteleostomi
ENSG00000071189	SNX13	7	0	Euteleostomi	Euteleostomi
ENSG00000071205	ARHGAP10	4	0	Euteleostomi	Euteleostomi
ENSG00000071243	ING3	7	0	Euteleostomi	Euteleostomi
ENSG00000071246	VASH1	14	0	Euteleostomi	Euteleostomi
ENSG00000071282	LMCD1	3	0	Euteleostomi	Euteleostomi
ENSG00000071462	BUD23	7	0	Euteleostomi	Euteleostomi
ENSG00000071537	SEL1L	14	0	Euteleostomi	Euteleostomi
ENSG00000071539	TRIP13	5	0	Euteleostomi	Euteleostomi
ENSG00000071553	ATP6AP1	X	0	Euteleostomi	Euteleostomi
ENSG00000071564	TCF3	19	0	Euteleostomi	Euteleostomi
ENSG00000071575	TRIB2	2	0	Euteleostomi	Euteleostomi
ENSG00000071626	DAZAP1	19	0	Euteleostomi	Euteleostomi
ENSG00000071655	MBD3	19	0	Euteleostomi	Euteleostomi
ENSG00000071794	HLTF	3	0	Euteleostomi	Euteleostomi
ENSG00000071894	CPSF1	8	0	Euteleostomi	Euteleostomi
ENSG00000071909	MYO3B	2	0	Euteleostomi	Euteleostomi
ENSG00000071967	CYBRD1	2	0	Euteleostomi	Euteleostomi
ENSG00000071994	PDCD2	6	0	Euteleostomi	Euteleostomi
ENSG00000072071	ADGRL1	19	0	Euteleostomi	Euteleostomi
ENSG00000072110	ACTN1	14	0	Euteleostomi	Euteleostomi
ENSG00000072121	ZFYVE26	14	0	Euteleostomi	Euteleostomi
ENSG00000072134	EPN2	17	0	Euteleostomi	Euteleostomi
ENSG00000072195	SPEG	2	0	Euteleostomi	Euteleostomi
ENSG00000072201	LNX1	4	0	Euteleostomi	Euteleostomi
ENSG00000072274	TFRC	3	0	Euteleostomi	Euteleostomi
ENSG00000072310	SREBF1	17	0	Euteleostomi	Euteleostomi
ENSG00000072315	TRPC5	X	0	Euteleostomi	Euteleostomi
ENSG00000072364	AFF4	5	0	Euteleostomi	Euteleostomi
ENSG00000072415	PALS1	14	0	Euteleostomi	Euteleostomi
ENSG00000072501	SMC1A	X	0	Euteleostomi	Euteleostomi
ENSG00000072506	HSD17B10	X	0	Euteleostomi	Euteleostomi
ENSG00000072518	MARK2	11	0	Euteleostomi	Euteleostomi
ENSG00000072571	HMMR	5	0	Euteleostomi	Euteleostomi
ENSG00000072609	CHFR	12	0	Euteleostomi	Euteleostomi
ENSG00000072657	TRHDE	12	0	Euteleostomi	Euteleostomi
ENSG00000072682	P4HA2	5	0	Euteleostomi	Euteleostomi
ENSG00000072736	NFATC3	16	0	Euteleostomi	Euteleostomi
ENSG00000072786	STK10	5	0	Euteleostomi	Euteleostomi
ENSG00000072803	FBXW11	5	0	Euteleostomi	Euteleostomi
ENSG00000072818	ACAP1	17	0	Euteleostomi	Euteleostomi
ENSG00000072864	NDE1	16	0	Euteleostomi	Euteleostomi
ENSG00000072952	IRAG1	11	0	Euteleostomi	Euteleostomi
ENSG00000072954	TMEM38A	19	0	Euteleostomi	Euteleostomi
ENSG00000072958	AP1M1	19	0	Euteleostomi	Euteleostomi
ENSG00000073050	XRCC1	19	0	Euteleostomi	Euteleostomi
ENSG00000073060	SCARB1	12	0	Euteleostomi	Euteleostomi
ENSG00000073111	MCM2	3	0	Euteleostomi	Euteleostomi
ENSG00000073146	MOV10L1	22	0	Euteleostomi	Euteleostomi
ENSG00000073150	PANX2	22	0	Euteleostomi	Euteleostomi
ENSG00000073169	SELENOO	22	0	Euteleostomi	Euteleostomi
ENSG00000073282	TP63	3	0	Euteleostomi	Euteleostomi
ENSG00000073331	ALPK1	4	0	Euteleostomi	Euteleostomi
ENSG00000073350	LLGL2	17	0	Euteleostomi	Euteleostomi
ENSG00000073417	PDE8A	15	0	Euteleostomi	Euteleostomi
ENSG00000073464	CLCN4	X	0	Euteleostomi	Euteleostomi
ENSG00000073536	NLE1	17	0	Euteleostomi	Euteleostomi
ENSG00000073578	SDHA	5	0	Euteleostomi	Euteleostomi
ENSG00000073584	SMARCE1	17	0	Euteleostomi	Euteleostomi
ENSG00000073614	KDM5A	12	0	Euteleostomi	Euteleostomi
ENSG00000073670	ADAM11	17	0	Euteleostomi	Euteleostomi
ENSG00000073711	PPP2R3A	3	0	Euteleostomi	Euteleostomi
ENSG00000073712	FERMT2	14	0	Euteleostomi	Euteleostomi
ENSG00000073734	ABCB11	2	0	Euteleostomi	Euteleostomi
ENSG00000073737	DHRS9	2	0	Euteleostomi	Euteleostomi
ENSG00000073756	PTGS2	1	0	Euteleostomi	Euteleostomi
ENSG00000073792	IGF2BP2	3	0	Euteleostomi	Euteleostomi
ENSG00000073803	MAP3K13	3	0	Euteleostomi	Euteleostomi
ENSG00000073849	ST6GAL1	3	0	Euteleostomi	Euteleostomi
ENSG00000073861	TBX21	17	0	Euteleostomi	Euteleostomi
ENSG00000073910	FRY	13	0	Euteleostomi	Euteleostomi
ENSG00000073921	PICALM	11	0	Euteleostomi	Euteleostomi
ENSG00000073969	NSF	17	0	Euteleostomi	Euteleostomi
ENSG00000074047	GLI2	2	0	Euteleostomi	Euteleostomi
ENSG00000074054	CLASP1	2	0	Euteleostomi	Euteleostomi
ENSG00000074071	MRPS34	16	0	Euteleostomi	Euteleostomi
ENSG00000074201	CLNS1A	11	0	Euteleostomi	Euteleostomi
ENSG00000074211	PPP2R2C	4	0	Euteleostomi	Euteleostomi
ENSG00000074266	EED	11	0	Euteleostomi	Euteleostomi
ENSG00000074276	CDHR2	5	0	Euteleostomi	Euteleostomi
ENSG00000074317	SNCB	5	0	Euteleostomi	Euteleostomi
ENSG00000074319	TSG101	11	0	Euteleostomi	Euteleostomi
ENSG00000074356	NCBP3	17	0	Euteleostomi	Euteleostomi
ENSG00000074370	ATP2A3	17	0	Euteleostomi	Euteleostomi
ENSG00000074416	MGLL	3	0	Euteleostomi	Euteleostomi
ENSG00000074527	NTN4	12	0	Euteleostomi	Euteleostomi
ENSG00000074582	BCS1L	2	0	Euteleostomi	Euteleostomi
ENSG00000074590	NUAK1	12	0	Euteleostomi	Euteleostomi
ENSG00000074621	SLC24A1	15	0	Euteleostomi	Euteleostomi
ENSG00000074657	ZNF532	18	0	Euteleostomi	Euteleostomi
ENSG00000074660	SCARF1	17	0	Euteleostomi	Euteleostomi
ENSG00000074695	LMAN1	18	0	Euteleostomi	Euteleostomi
ENSG00000074696	HACD3	15	0	Euteleostomi	Euteleostomi
ENSG00000074706	IPCEF1	6	0	Euteleostomi	Euteleostomi
ENSG00000074755	ZZEF1	17	0	Euteleostomi	Euteleostomi
ENSG00000074803	SLC12A1	15	0	Euteleostomi	Euteleostomi
ENSG00000074855	ANO8	19	0	Euteleostomi	Euteleostomi
ENSG00000074935	TUBE1	6	0	Euteleostomi	Euteleostomi
ENSG00000074964	ARHGEF10L	1	0	Euteleostomi	Euteleostomi
ENSG00000075035	WSCD2	12	0	Euteleostomi	Euteleostomi
ENSG00000075043	KCNQ2	20	0	Euteleostomi	Euteleostomi
ENSG00000075073	TACR2	10	0	Euteleostomi	Euteleostomi
ENSG00000075089	ACTR6	12	0	Euteleostomi	Euteleostomi
ENSG00000075151	EIF4G3	1	0	Euteleostomi	Euteleostomi
ENSG00000075188	NUP37	12	0	Euteleostomi	Euteleostomi
ENSG00000075213	SEMA3A	7	0	Euteleostomi	Euteleostomi
ENSG00000075234	TTC38	22	0	Euteleostomi	Euteleostomi
ENSG00000075239	ACAT1	11	0	Euteleostomi	Euteleostomi
ENSG00000075240	GRAMD4	22	0	Euteleostomi	Euteleostomi
ENSG00000075275	CELSR1	22	0	Euteleostomi	Euteleostomi
ENSG00000075290	WNT8B	10	0	Euteleostomi	Euteleostomi
ENSG00000075292	ZNF638	2	0	Euteleostomi	Euteleostomi
ENSG00000075336	TIMM21	18	0	Euteleostomi	Euteleostomi
ENSG00000075340	ADD2	2	0	Euteleostomi	Euteleostomi
ENSG00000075388	FGF4	11	0	Euteleostomi	Euteleostomi
ENSG00000075391	RASAL2	1	0	Euteleostomi	Euteleostomi
ENSG00000075399	VPS9D1	16	0	Euteleostomi	Euteleostomi
ENSG00000075413	MARK3	14	0	Euteleostomi	Euteleostomi
ENSG00000075415	SLC25A3	12	0	Euteleostomi	Euteleostomi
ENSG00000075420	FNDC3B	3	0	Euteleostomi	Euteleostomi
ENSG00000075426	FOSL2	2	0	Euteleostomi	Euteleostomi
ENSG00000075429	CACNG5	17	0	Euteleostomi	Euteleostomi
ENSG00000075461	CACNG4	17	0	Euteleostomi	Euteleostomi
ENSG00000075539	FRYL	4	0	Euteleostomi	Euteleostomi
ENSG00000075568	TMEM131	2	0	Euteleostomi	Euteleostomi
ENSG00000075618	FSCN1	7	0	Euteleostomi	Euteleostomi
ENSG00000075624	ACTB	7	0	Euteleostomi	Euteleostomi
ENSG00000075643	MOCOS	18	0	Euteleostomi	Euteleostomi
ENSG00000075711	DLG1	3	0	Euteleostomi	Euteleostomi
ENSG00000075785	RAB7A	3	0	Euteleostomi	Euteleostomi
ENSG00000075790	BCAP29	7	0	Euteleostomi	Euteleostomi
ENSG00000075856	SART3	12	0	Euteleostomi	Euteleostomi
ENSG00000075891	PAX2	10	0	Euteleostomi	Euteleostomi
ENSG00000075914	EXOSC7	3	0	Euteleostomi	Euteleostomi
ENSG00000075945	KIFAP3	1	0	Euteleostomi	Euteleostomi
ENSG00000075975	MKRN2	3	0	Euteleostomi	Euteleostomi
ENSG00000076003	MCM6	2	0	Euteleostomi	Euteleostomi
ENSG00000076043	REXO2	11	0	Euteleostomi	Euteleostomi
ENSG00000076067	RBMS2	12	0	Euteleostomi	Euteleostomi
ENSG00000076108	BAZ2A	12	0	Euteleostomi	Euteleostomi
ENSG00000076201	PTPN23	3	0	Euteleostomi	Euteleostomi
ENSG00000076242	MLH1	3	0	Euteleostomi	Euteleostomi
ENSG00000076248	UNG	12	0	Euteleostomi	Euteleostomi
ENSG00000076321	KLHL20	1	0	Euteleostomi	Euteleostomi
ENSG00000076344	RGS11	16	0	Euteleostomi	Euteleostomi
ENSG00000076351	SLC46A1	17	0	Euteleostomi	Euteleostomi
ENSG00000076356	PLXNA2	1	0	Euteleostomi	Euteleostomi
ENSG00000076513	ANKRD13A	12	0	Euteleostomi	Euteleostomi
ENSG00000076554	TPD52	8	0	Euteleostomi	Euteleostomi
ENSG00000076555	ACACB	12	0	Euteleostomi	Euteleostomi
ENSG00000076604	TRAF4	17	0	Euteleostomi	Euteleostomi
ENSG00000076641	PAG1	8	0	Euteleostomi	Euteleostomi
ENSG00000076650	GPATCH1	19	0	Euteleostomi	Euteleostomi
ENSG00000076685	NT5C2	10	0	Euteleostomi	Euteleostomi
ENSG00000076706	MCAM	11	0	Euteleostomi	Euteleostomi
ENSG00000076716	GPC4	X	0	Euteleostomi	Euteleostomi
ENSG00000076770	MBNL3	X	0	Euteleostomi	Euteleostomi
ENSG00000076864	RAP1GAP	1	0	Euteleostomi	Euteleostomi
ENSG00000076984	MAP2K7	19	0	Euteleostomi	Euteleostomi
ENSG00000077009	NMRK2	19	0	Euteleostomi	Euteleostomi
ENSG00000077044	DGKD	2	0	Euteleostomi	Euteleostomi
ENSG00000077063	CTTNBP2	7	0	Euteleostomi	Euteleostomi
ENSG00000077092	RARB	3	0	Euteleostomi	Euteleostomi
ENSG00000077097	TOP2B	3	0	Euteleostomi	Euteleostomi
ENSG00000077147	TM9SF3	10	0	Euteleostomi	Euteleostomi
ENSG00000077150	NFKB2	10	0	Euteleostomi	Euteleostomi
ENSG00000077152	UBE2T	1	0	Euteleostomi	Euteleostomi
ENSG00000077157	PPP1R12B	1	0	Euteleostomi	Euteleostomi
ENSG00000077232	DNAJC10	2	0	Euteleostomi	Euteleostomi
ENSG00000077235	GTF3C1	16	0	Euteleostomi	Euteleostomi
ENSG00000077254	USP33	1	0	Euteleostomi	Euteleostomi
ENSG00000077264	PAK3	X	0	Euteleostomi	Euteleostomi
ENSG00000077274	CAPN6	X	0	Euteleostomi	Euteleostomi
ENSG00000077279	DCX	X	0	Euteleostomi	Euteleostomi
ENSG00000077312	SNRPA	19	0	Euteleostomi	Euteleostomi
ENSG00000077327	SPAG6	10	0	Euteleostomi	Euteleostomi
ENSG00000077348	EXOSC5	19	0	Euteleostomi	Euteleostomi
ENSG00000077380	DYNC1I2	2	0	Euteleostomi	Euteleostomi
ENSG00000077420	APBB1IP	10	0	Euteleostomi	Euteleostomi
ENSG00000077454	LRCH4	7	0	Euteleostomi	Euteleostomi
ENSG00000077463	SIRT6	19	0	Euteleostomi	Euteleostomi
ENSG00000077498	TYR	11	0	Euteleostomi	Euteleostomi
ENSG00000077514	POLD3	11	0	Euteleostomi	Euteleostomi
ENSG00000077522	ACTN2	1	0	Euteleostomi	Euteleostomi
ENSG00000077549	CAPZB	1	0	Euteleostomi	Euteleostomi
ENSG00000077585	GPR137B	1	0	Euteleostomi	Euteleostomi
ENSG00000077684	JADE1	4	0	Euteleostomi	Euteleostomi
ENSG00000077713	SLC25A43	X	0	Euteleostomi	Euteleostomi
ENSG00000077721	UBE2A	X	0	Euteleostomi	Euteleostomi
ENSG00000077782	FGFR1	8	0	Euteleostomi	Euteleostomi
ENSG00000077800	FKBP6	7	0	Euteleostomi	Euteleostomi
ENSG00000077942	FBLN1	22	0	Euteleostomi	Euteleostomi
ENSG00000077943	ITGA8	10	0	Euteleostomi	Euteleostomi
ENSG00000078018	MAP2	2	0	Euteleostomi	Euteleostomi
ENSG00000078053	AMPH	7	0	Euteleostomi	Euteleostomi
ENSG00000078070	MCCC1	3	0	Euteleostomi	Euteleostomi
ENSG00000078098	FAP	2	0	Euteleostomi	Euteleostomi
ENSG00000078124	ACER3	11	0	Euteleostomi	Euteleostomi
ENSG00000078140	UBE2K	4	0	Euteleostomi	Euteleostomi
ENSG00000078142	PIK3C3	18	0	Euteleostomi	Euteleostomi
ENSG00000078177	N4BP2	4	0	Euteleostomi	Euteleostomi
ENSG00000078304	PPP2R5C	14	0	Euteleostomi	Euteleostomi
ENSG00000078328	RBFOX1	16	0	Euteleostomi	Euteleostomi
ENSG00000078369	GNB1	1	0	Euteleostomi	Euteleostomi
ENSG00000078399	HOXA9	7	0	Euteleostomi	Euteleostomi
ENSG00000078401	EDN1	6	0	Euteleostomi	Euteleostomi
ENSG00000078403	MLLT10	10	0	Euteleostomi	Euteleostomi
ENSG00000078549	ADCYAP1R1	7	0	Euteleostomi	Euteleostomi
ENSG00000078579	FGF20	8	0	Euteleostomi	Euteleostomi
ENSG00000078589	P2RY10	X	0	Euteleostomi	Euteleostomi
ENSG00000078618	NRDC	1	0	Euteleostomi	Euteleostomi
ENSG00000078674	PCM1	8	0	Euteleostomi	Euteleostomi
ENSG00000078687	TNRC6C	17	0	Euteleostomi	Euteleostomi
ENSG00000078699	CBFA2T2	20	0	Euteleostomi	Euteleostomi
ENSG00000078725	BRINP1	9	0	Euteleostomi	Euteleostomi
ENSG00000078747	ITCH	20	0	Euteleostomi	Euteleostomi
ENSG00000078804	TP53INP2	20	0	Euteleostomi	Euteleostomi
ENSG00000078808	SDF4	1	0	Euteleostomi	Euteleostomi
ENSG00000078814	MYH7B	20	0	Euteleostomi	Euteleostomi
ENSG00000078900	TP73	1	0	Euteleostomi	Euteleostomi
ENSG00000078902	TOLLIP	11	0	Euteleostomi	Euteleostomi
ENSG00000079102	RUNX1T1	8	0	Euteleostomi	Euteleostomi
ENSG00000079134	THOC1	18	0	Euteleostomi	Euteleostomi
ENSG00000079150	FKBP7	2	0	Euteleostomi	Euteleostomi
ENSG00000079156	OSBPL6	2	0	Euteleostomi	Euteleostomi
ENSG00000079215	SLC1A3	5	0	Euteleostomi	Euteleostomi
ENSG00000079246	XRCC5	2	0	Euteleostomi	Euteleostomi
ENSG00000079257	LXN	3	0	Euteleostomi	Euteleostomi
ENSG00000079277	MKNK1	1	0	Euteleostomi	Euteleostomi
ENSG00000079308	TNS1	2	0	Euteleostomi	Euteleostomi
ENSG00000079313	REXO1	19	0	Euteleostomi	Euteleostomi
ENSG00000079332	SAR1A	10	0	Euteleostomi	Euteleostomi
ENSG00000079337	RAPGEF3	12	0	Euteleostomi	Euteleostomi
ENSG00000079387	SENP1	12	0	Euteleostomi	Euteleostomi
ENSG00000079393	DUSP13	10	0	Euteleostomi	Euteleostomi
ENSG00000079432	CIC	19	0	Euteleostomi	Euteleostomi
ENSG00000079459	FDFT1	8	0	Euteleostomi	Euteleostomi
ENSG00000079616	KIF22	16	0	Euteleostomi	Euteleostomi
ENSG00000079691	CARMIL1	6	0	Euteleostomi	Euteleostomi
ENSG00000079739	PGM1	1	0	Euteleostomi	Euteleostomi
ENSG00000079785	DDX1	2	0	Euteleostomi	Euteleostomi
ENSG00000079805	DNM2	19	0	Euteleostomi	Euteleostomi
ENSG00000079819	EPB41L2	6	0	Euteleostomi	Euteleostomi
ENSG00000079841	RIMS1	6	0	Euteleostomi	Euteleostomi
ENSG00000079950	STX7	6	0	Euteleostomi	Euteleostomi
ENSG00000079974	RABL2B	22	0	Euteleostomi	Euteleostomi
ENSG00000079999	KEAP1	19	0	Euteleostomi	Euteleostomi
ENSG00000080031	PTPRH	19	0	Euteleostomi	Euteleostomi
ENSG00000080166	DCT	13	0	Euteleostomi	Euteleostomi
ENSG00000080189	SLC35C2	20	0	Euteleostomi	Euteleostomi
ENSG00000080298	RFX3	9	0	Euteleostomi	Euteleostomi
ENSG00000080345	RIF1	2	0	Euteleostomi	Euteleostomi
ENSG00000080371	RAB21	12	0	Euteleostomi	Euteleostomi
ENSG00000080493	SLC4A4	4	0	Euteleostomi	Euteleostomi
ENSG00000080503	SMARCA2	9	0	Euteleostomi	Euteleostomi
ENSG00000080511	RDH8	19	0	Euteleostomi	Euteleostomi
ENSG00000080546	SESN1	6	0	Euteleostomi	Euteleostomi
ENSG00000080561	MID2	X	0	Euteleostomi	Euteleostomi
ENSG00000080608	PUM3	9	0	Euteleostomi	Euteleostomi
ENSG00000080618	CPB2	13	0	Euteleostomi	Euteleostomi
ENSG00000080644	CHRNA3	15	0	Euteleostomi	Euteleostomi
ENSG00000080709	KCNN2	5	0	Euteleostomi	Euteleostomi
ENSG00000080802	CNOT4	7	0	Euteleostomi	Euteleostomi
ENSG00000080815	PSEN1	14	0	Euteleostomi	Euteleostomi
ENSG00000080819	CPOX	3	0	Euteleostomi	Euteleostomi
ENSG00000080822	CLDND1	3	0	Euteleostomi	Euteleostomi
ENSG00000080823	MOK	14	0	Euteleostomi	Euteleostomi
ENSG00000080839	RBL1	20	0	Euteleostomi	Euteleostomi
ENSG00000080845	DLGAP4	20	0	Euteleostomi	Euteleostomi
ENSG00000080854	IGSF9B	11	0	Euteleostomi	Euteleostomi
ENSG00000081014	AP4E1	15	0	Euteleostomi	Euteleostomi
ENSG00000081019	RSBN1	1	0	Euteleostomi	Euteleostomi
ENSG00000081026	MAGI3	1	0	Euteleostomi	Euteleostomi
ENSG00000081059	TCF7	5	0	Euteleostomi	Euteleostomi
ENSG00000081087	OSTM1	6	0	Euteleostomi	Euteleostomi
ENSG00000081138	CDH7	18	0	Euteleostomi	Euteleostomi
ENSG00000081148	IMPG2	3	0	Euteleostomi	Euteleostomi
ENSG00000081154	PCNP	3	0	Euteleostomi	Euteleostomi
ENSG00000081177	EXD2	14	0	Euteleostomi	Euteleostomi
ENSG00000081181	ARG2	14	0	Euteleostomi	Euteleostomi
ENSG00000081189	MEF2C	5	0	Euteleostomi	Euteleostomi
ENSG00000081237	PTPRC	1	0	Euteleostomi	Euteleostomi
ENSG00000081248	CACNA1S	1	0	Euteleostomi	Euteleostomi
ENSG00000081277	PKP1	1	0	Euteleostomi	Euteleostomi
ENSG00000081307	UBA5	3	0	Euteleostomi	Euteleostomi
ENSG00000081320	STK17B	2	0	Euteleostomi	Euteleostomi
ENSG00000081377	CDC14B	9	0	Euteleostomi	Euteleostomi
ENSG00000081479	LRP2	2	0	Euteleostomi	Euteleostomi
ENSG00000081692	JMJD4	1	0	Euteleostomi	Euteleostomi
ENSG00000081721	DUSP12	1	0	Euteleostomi	Euteleostomi
ENSG00000081760	AACS	12	0	Euteleostomi	Euteleostomi
ENSG00000081803	CADPS2	7	0	Euteleostomi	Euteleostomi
ENSG00000081853	PCDHGA2	5	0	Euteleostomi	Euteleostomi
ENSG00000081913	PHLPP1	18	0	Euteleostomi	Euteleostomi
ENSG00000081923	ATP8B1	18	0	Euteleostomi	Euteleostomi
ENSG00000082014	SMARCD3	7	0	Euteleostomi	Euteleostomi
ENSG00000082068	WDR70	5	0	Euteleostomi	Euteleostomi
ENSG00000082126	MPP4	2	0	Euteleostomi	Euteleostomi
ENSG00000082146	STRADB	2	0	Euteleostomi	Euteleostomi
ENSG00000082153	BZW1	2	0	Euteleostomi	Euteleostomi
ENSG00000082175	PGR	11	0	Euteleostomi	Euteleostomi
ENSG00000082212	ME2	18	0	Euteleostomi	Euteleostomi
ENSG00000082213	C5orf22	5	0	Euteleostomi	Euteleostomi
ENSG00000082258	CCNT2	2	0	Euteleostomi	Euteleostomi
ENSG00000082269	FAM135A	6	0	Euteleostomi	Euteleostomi
ENSG00000082293	COL19A1	6	0	Euteleostomi	Euteleostomi
ENSG00000082397	EPB41L3	18	0	Euteleostomi	Euteleostomi
ENSG00000082438	COBLL1	2	0	Euteleostomi	Euteleostomi
ENSG00000082458	DLG3	X	0	Euteleostomi	Euteleostomi
ENSG00000082482	KCNK2	1	0	Euteleostomi	Euteleostomi
ENSG00000082515	MRPL22	5	0	Euteleostomi	Euteleostomi
ENSG00000082516	GEMIN5	5	0	Euteleostomi	Euteleostomi
ENSG00000082641	NFE2L1	17	0	Euteleostomi	Euteleostomi
ENSG00000082684	SEMA5B	3	0	Euteleostomi	Euteleostomi
ENSG00000082781	ITGB5	3	0	Euteleostomi	Euteleostomi
ENSG00000082805	ERC1	12	0	Euteleostomi	Euteleostomi
ENSG00000082898	XPO1	2	0	Euteleostomi	Euteleostomi
ENSG00000082996	RNF13	3	0	Euteleostomi	Euteleostomi
ENSG00000083067	TRPM3	9	0	Euteleostomi	Euteleostomi
ENSG00000083097	DOP1A	6	0	Euteleostomi	Euteleostomi
ENSG00000083099	LYRM2	6	0	Euteleostomi	Euteleostomi
ENSG00000083123	BCKDHB	6	0	Euteleostomi	Euteleostomi
ENSG00000083168	KAT6A	8	0	Euteleostomi	Euteleostomi
ENSG00000083223	TUT7	9	0	Euteleostomi	Euteleostomi
ENSG00000083290	ULK2	17	0	Euteleostomi	Euteleostomi
ENSG00000083307	GRHL2	8	0	Euteleostomi	Euteleostomi
ENSG00000083312	TNPO1	5	0	Euteleostomi	Euteleostomi
ENSG00000083444	PLOD1	1	0	Euteleostomi	Euteleostomi
ENSG00000083454	P2RX5	17	0	Euteleostomi	Euteleostomi
ENSG00000083457	ITGAE	17	0	Euteleostomi	Euteleostomi
ENSG00000083520	DIS3	13	0	Euteleostomi	Euteleostomi
ENSG00000083535	PIBF1	13	0	Euteleostomi	Euteleostomi
ENSG00000083544	TDRD3	13	0	Euteleostomi	Euteleostomi
ENSG00000083642	PDS5B	13	0	Euteleostomi	Euteleostomi
ENSG00000083720	OXCT1	5	0	Euteleostomi	Euteleostomi
ENSG00000083782	EPYC	12	0	Euteleostomi	Euteleostomi
ENSG00000083799	CYLD	16	0	Euteleostomi	Euteleostomi
ENSG00000083857	FAT1	4	0	Euteleostomi	Euteleostomi
ENSG00000083896	YTHDC1	4	0	Euteleostomi	Euteleostomi
ENSG00000083937	CHMP2B	3	0	Euteleostomi	Euteleostomi
ENSG00000084070	SMAP2	1	0	Euteleostomi	Euteleostomi
ENSG00000084073	ZMPSTE24	1	0	Euteleostomi	Euteleostomi
ENSG00000084090	STARD7	2	0	Euteleostomi	Euteleostomi
ENSG00000084092	NOA1	4	0	Euteleostomi	Euteleostomi
ENSG00000084093	REST	4	0	Euteleostomi	Euteleostomi
ENSG00000084110	HAL	12	0	Euteleostomi	Euteleostomi
ENSG00000084112	SSH1	12	0	Euteleostomi	Euteleostomi
ENSG00000084234	APLP2	11	0	Euteleostomi	Euteleostomi
ENSG00000084463	WBP11	12	0	Euteleostomi	Euteleostomi
ENSG00000084623	EIF3I	1	0	Euteleostomi	Euteleostomi
ENSG00000084628	NKAIN1	1	0	Euteleostomi	Euteleostomi
ENSG00000084636	COL16A1	1	0	Euteleostomi	Euteleostomi
ENSG00000084652	TXLNA	1	0	Euteleostomi	Euteleostomi
ENSG00000084674	APOB	2	0	Euteleostomi	Euteleostomi
ENSG00000084676	NCOA1	2	0	Euteleostomi	Euteleostomi
ENSG00000084693	AGBL5	2	0	Euteleostomi	Euteleostomi
ENSG00000084710	EFR3B	2	0	Euteleostomi	Euteleostomi
ENSG00000084731	KIF3C	2	0	Euteleostomi	Euteleostomi
ENSG00000084754	HADHA	2	0	Euteleostomi	Euteleostomi
ENSG00000084764	MAPRE3	2	0	Euteleostomi	Euteleostomi
ENSG00000084774	CAD	2	0	Euteleostomi	Euteleostomi
ENSG00000085117	CD82	11	0	Euteleostomi	Euteleostomi
ENSG00000085185	BCORL1	X	0	Euteleostomi	Euteleostomi
ENSG00000085224	ATRX	X	0	Euteleostomi	Euteleostomi
ENSG00000085231	AK6	5	0	Euteleostomi	Euteleostomi
ENSG00000085276	MECOM	3	0	Euteleostomi	Euteleostomi
ENSG00000085377	PREP	6	0	Euteleostomi	Euteleostomi
ENSG00000085382	HACE1	6	0	Euteleostomi	Euteleostomi
ENSG00000085415	SEH1L	18	0	Euteleostomi	Euteleostomi
ENSG00000085433	WDR47	1	0	Euteleostomi	Euteleostomi
ENSG00000085449	WDFY1	2	0	Euteleostomi	Euteleostomi
ENSG00000085511	MAP3K4	6	0	Euteleostomi	Euteleostomi
ENSG00000085552	IGSF9	1	0	Euteleostomi	Euteleostomi
ENSG00000085719	CPNE3	8	0	Euteleostomi	Euteleostomi
ENSG00000085721	RRN3	16	0	Euteleostomi	Euteleostomi
ENSG00000085733	CTTN	11	0	Euteleostomi	Euteleostomi
ENSG00000085741	WNT11	11	0	Euteleostomi	Euteleostomi
ENSG00000085760	MTIF2	2	0	Euteleostomi	Euteleostomi
ENSG00000085788	DDHD2	8	0	Euteleostomi	Euteleostomi
ENSG00000085831	TTC39A	1	0	Euteleostomi	Euteleostomi
ENSG00000085832	EPS15	1	0	Euteleostomi	Euteleostomi
ENSG00000085840	ORC1	1	0	Euteleostomi	Euteleostomi
ENSG00000085872	CHERP	19	0	Euteleostomi	Euteleostomi
ENSG00000085978	ATG16L1	2	0	Euteleostomi	Euteleostomi
ENSG00000085982	USP40	2	0	Euteleostomi	Euteleostomi
ENSG00000085998	POMGNT1	1	0	Euteleostomi	Euteleostomi
ENSG00000085999	RAD54L	1	0	Euteleostomi	Euteleostomi
ENSG00000086015	MAST2	1	0	Euteleostomi	Euteleostomi
ENSG00000086061	DNAJA1	9	0	Euteleostomi	Euteleostomi
ENSG00000086062	B4GALT1	9	0	Euteleostomi	Euteleostomi
ENSG00000086065	CHMP5	9	0	Euteleostomi	Euteleostomi
ENSG00000086102	NFX1	9	0	Euteleostomi	Euteleostomi
ENSG00000086189	DIMT1	5	0	Euteleostomi	Euteleostomi
ENSG00000086200	IPO11	5	0	Euteleostomi	Euteleostomi
ENSG00000086232	EIF2AK1	7	0	Euteleostomi	Euteleostomi
ENSG00000086289	EPDR1	7	0	Euteleostomi	Euteleostomi
ENSG00000086475	SEPHS1	10	0	Euteleostomi	Euteleostomi
ENSG00000086504	MRPL28	16	0	Euteleostomi	Euteleostomi
ENSG00000086544	ITPKC	19	0	Euteleostomi	Euteleostomi
ENSG00000086570	FAT2	5	0	Euteleostomi	Euteleostomi
ENSG00000086589	RBM22	5	0	Euteleostomi	Euteleostomi
ENSG00000086598	TMED2	12	0	Euteleostomi	Euteleostomi
ENSG00000086619	ERO1B	1	0	Euteleostomi	Euteleostomi
ENSG00000086712	TXLNG	X	0	Euteleostomi	Euteleostomi
ENSG00000086717	PPEF1	X	0	Euteleostomi	Euteleostomi
ENSG00000086758	HUWE1	X	0	Euteleostomi	Euteleostomi
ENSG00000086827	ZW10	11	0	Euteleostomi	Euteleostomi
ENSG00000086848	ALG9	11	0	Euteleostomi	Euteleostomi
ENSG00000086967	MYBPC2	19	0	Euteleostomi	Euteleostomi
ENSG00000086991	NOX4	11	0	Euteleostomi	Euteleostomi
ENSG00000087008	ACOX3	4	0	Euteleostomi	Euteleostomi
ENSG00000087085	ACHE	7	0	Euteleostomi	Euteleostomi
ENSG00000087087	SRRT	7	0	Euteleostomi	Euteleostomi
ENSG00000087095	NLK	17	0	Euteleostomi	Euteleostomi
ENSG00000087111	PIGS	17	0	Euteleostomi	Euteleostomi
ENSG00000087152	ATXN7L3	17	0	Euteleostomi	Euteleostomi
ENSG00000087157	PGS1	17	0	Euteleostomi	Euteleostomi
ENSG00000087191	PSMC5	17	0	Euteleostomi	Euteleostomi
ENSG00000087245	MMP2	16	0	Euteleostomi	Euteleostomi
ENSG00000087253	LPCAT2	16	0	Euteleostomi	Euteleostomi
ENSG00000087258	GNAO1	16	0	Euteleostomi	Euteleostomi
ENSG00000087263	OGFOD1	16	0	Euteleostomi	Euteleostomi
ENSG00000087266	SH3BP2	4	0	Euteleostomi	Euteleostomi
ENSG00000087269	NOP14	4	0	Euteleostomi	Euteleostomi
ENSG00000087274	ADD1	4	0	Euteleostomi	Euteleostomi
ENSG00000087299	L2HGDH	14	0	Euteleostomi	Euteleostomi
ENSG00000087302	RTRAF	14	0	Euteleostomi	Euteleostomi
ENSG00000087303	NID2	14	0	Euteleostomi	Euteleostomi
ENSG00000087365	SF3B2	11	0	Euteleostomi	Euteleostomi
ENSG00000087448	KLHL42	12	0	Euteleostomi	Euteleostomi
ENSG00000087460	GNAS	20	0	Euteleostomi	Euteleostomi
ENSG00000087470	DNM1L	12	0	Euteleostomi	Euteleostomi
ENSG00000087494	PTHLH	12	0	Euteleostomi	Euteleostomi
ENSG00000087495	PHACTR3	20	0	Euteleostomi	Euteleostomi
ENSG00000087502	ERGIC2	12	0	Euteleostomi	Euteleostomi
ENSG00000087589	CASS4	20	0	Euteleostomi	Euteleostomi
ENSG00000087842	PIR	X	0	Euteleostomi	Euteleostomi
ENSG00000087884	AAMDC	11	0	Euteleostomi	Euteleostomi
ENSG00000087903	RFX2	19	0	Euteleostomi	Euteleostomi
ENSG00000087995	METTL2A	17	0	Euteleostomi	Euteleostomi
ENSG00000088035	ALG6	1	0	Euteleostomi	Euteleostomi
ENSG00000088038	CNOT3	19	0	Euteleostomi	Euteleostomi
ENSG00000088179	PTPN4	2	0	Euteleostomi	Euteleostomi
ENSG00000088205	DDX18	2	0	Euteleostomi	Euteleostomi
ENSG00000088247	KHSRP	19	0	Euteleostomi	Euteleostomi
ENSG00000088256	GNA11	19	0	Euteleostomi	Euteleostomi
ENSG00000088280	ASAP3	1	0	Euteleostomi	Euteleostomi
ENSG00000088298	EDEM2	20	0	Euteleostomi	Euteleostomi
ENSG00000088305	DNMT3B	20	0	Euteleostomi	Euteleostomi
ENSG00000088320	REM1	20	0	Euteleostomi	Euteleostomi
ENSG00000088367	EPB41L1	20	0	Euteleostomi	Euteleostomi
ENSG00000088386	SLC15A1	13	0	Euteleostomi	Euteleostomi
ENSG00000088387	DOCK9	13	0	Euteleostomi	Euteleostomi
ENSG00000088448	ANKRD10	13	0	Euteleostomi	Euteleostomi
ENSG00000088538	DOCK3	3	0	Euteleostomi	Euteleostomi
ENSG00000088543	C3orf18	3	0	Euteleostomi	Euteleostomi
ENSG00000088682	COQ9	16	0	Euteleostomi	Euteleostomi
ENSG00000088727	KIF9	3	0	Euteleostomi	Euteleostomi
ENSG00000088766	CRLS1	20	0	Euteleostomi	Euteleostomi
ENSG00000088808	PPP1R13B	14	0	Euteleostomi	Euteleostomi
ENSG00000088812	ATRN	20	0	Euteleostomi	Euteleostomi
ENSG00000088826	SMOX	20	0	Euteleostomi	Euteleostomi
ENSG00000088832	FKBP1A	20	0	Euteleostomi	Euteleostomi
ENSG00000088833	NSFL1C	20	0	Euteleostomi	Euteleostomi
ENSG00000088836	SLC4A11	20	0	Euteleostomi	Euteleostomi
ENSG00000088854	DNAAF9	20	0	Euteleostomi	Euteleostomi
ENSG00000088899	LZTS3	20	0	Euteleostomi	Euteleostomi
ENSG00000088992	TESC	12	0	Euteleostomi	Euteleostomi
ENSG00000089006	SNX5	20	0	Euteleostomi	Euteleostomi
ENSG00000089009	RPL6	12	0	Euteleostomi	Euteleostomi
ENSG00000089022	MAPKAPK5	12	0	Euteleostomi	Euteleostomi
ENSG00000089048	ESF1	20	0	Euteleostomi	Euteleostomi
ENSG00000089053	ANAPC5	12	0	Euteleostomi	Euteleostomi
ENSG00000089057	SLC23A2	20	0	Euteleostomi	Euteleostomi
ENSG00000089060	SLC8B1	12	0	Euteleostomi	Euteleostomi
ENSG00000089091	DZANK1	20	0	Euteleostomi	Euteleostomi
ENSG00000089094	KDM2B	12	0	Euteleostomi	Euteleostomi
ENSG00000089101	CFAP61	20	0	Euteleostomi	Euteleostomi
ENSG00000089116	LHX5	12	0	Euteleostomi	Euteleostomi
ENSG00000089123	TASP1	20	0	Euteleostomi	Euteleostomi
ENSG00000089154	GCN1	12	0	Euteleostomi	Euteleostomi
ENSG00000089157	RPLP0	12	0	Euteleostomi	Euteleostomi
ENSG00000089159	PXN	12	0	Euteleostomi	Euteleostomi
ENSG00000089163	SIRT4	12	0	Euteleostomi	Euteleostomi
ENSG00000089169	RPH3A	12	0	Euteleostomi	Euteleostomi
ENSG00000089177	KIF16B	20	0	Euteleostomi	Euteleostomi
ENSG00000089195	TRMT6	20	0	Euteleostomi	Euteleostomi
ENSG00000089220	PEBP1	12	0	Euteleostomi	Euteleostomi
ENSG00000089225	TBX5	12	0	Euteleostomi	Euteleostomi
ENSG00000089234	BRAP	12	0	Euteleostomi	Euteleostomi
ENSG00000089250	NOS1	12	0	Euteleostomi	Euteleostomi
ENSG00000089280	FUS	16	0	Euteleostomi	Euteleostomi
ENSG00000089351	GRAMD1A	19	0	Euteleostomi	Euteleostomi
ENSG00000089486	CDIP1	16	0	Euteleostomi	Euteleostomi
ENSG00000089558	KCNH4	17	0	Euteleostomi	Euteleostomi
ENSG00000089597	GANAB	11	0	Euteleostomi	Euteleostomi
ENSG00000089682	RBM41	X	0	Euteleostomi	Euteleostomi
ENSG00000089685	BIRC5	17	0	Euteleostomi	Euteleostomi
ENSG00000089693	MLF2	12	0	Euteleostomi	Euteleostomi
ENSG00000089723	OTUB2	14	0	Euteleostomi	Euteleostomi
ENSG00000089737	DDX24	14	0	Euteleostomi	Euteleostomi
ENSG00000089775	ZBTB25	14	0	Euteleostomi	Euteleostomi
ENSG00000089820	ARHGAP4	X	0	Euteleostomi	Euteleostomi
ENSG00000089847	ANKRD24	19	0	Euteleostomi	Euteleostomi
ENSG00000089876	DHX32	10	0	Euteleostomi	Euteleostomi
ENSG00000089902	RCOR1	14	0	Euteleostomi	Euteleostomi
ENSG00000089916	GPATCH2L	14	0	Euteleostomi	Euteleostomi
ENSG00000090006	LTBP4	19	0	Euteleostomi	Euteleostomi
ENSG00000090013	BLVRB	19	0	Euteleostomi	Euteleostomi
ENSG00000090020	SLC9A1	1	0	Euteleostomi	Euteleostomi
ENSG00000090054	SPTLC1	9	0	Euteleostomi	Euteleostomi
ENSG00000090061	CCNK	14	0	Euteleostomi	Euteleostomi
ENSG00000090097	PCBP4	3	0	Euteleostomi	Euteleostomi
ENSG00000090266	NDUFB2	7	0	Euteleostomi	Euteleostomi
ENSG00000090273	NUDC	1	0	Euteleostomi	Euteleostomi
ENSG00000090316	MAEA	4	0	Euteleostomi	Euteleostomi
ENSG00000090372	STRN4	19	0	Euteleostomi	Euteleostomi
ENSG00000090402	SI	3	0	Euteleostomi	Euteleostomi
ENSG00000090432	MUL1	1	0	Euteleostomi	Euteleostomi
ENSG00000090447	TFAP4	16	0	Euteleostomi	Euteleostomi
ENSG00000090470	PDCD7	15	0	Euteleostomi	Euteleostomi
ENSG00000090487	SPG21	15	0	Euteleostomi	Euteleostomi
ENSG00000090520	DNAJB11	3	0	Euteleostomi	Euteleostomi
ENSG00000090530	P3H2	3	0	Euteleostomi	Euteleostomi
ENSG00000090539	CHRD	3	0	Euteleostomi	Euteleostomi
ENSG00000090565	RAB11FIP3	16	0	Euteleostomi	Euteleostomi
ENSG00000090581	GNPTG	16	0	Euteleostomi	Euteleostomi
ENSG00000090615	GOLGA3	12	0	Euteleostomi	Euteleostomi
ENSG00000090621	PABPC4	1	0	Euteleostomi	Euteleostomi
ENSG00000090674	MCOLN1	19	0	Euteleostomi	Euteleostomi
ENSG00000090686	USP48	1	0	Euteleostomi	Euteleostomi
ENSG00000090776	EFNB1	X	0	Euteleostomi	Euteleostomi
ENSG00000090857	PDPR	16	0	Euteleostomi	Euteleostomi
ENSG00000090861	AARS1	16	0	Euteleostomi	Euteleostomi
ENSG00000090863	GLG1	16	0	Euteleostomi	Euteleostomi
ENSG00000090905	TNRC6A	16	0	Euteleostomi	Euteleostomi
ENSG00000090924	PLEKHG2	19	0	Euteleostomi	Euteleostomi
ENSG00000090971	NAT14	19	0	Euteleostomi	Euteleostomi
ENSG00000090975	PITPNM2	12	0	Euteleostomi	Euteleostomi
ENSG00000090989	EXOC1	4	0	Euteleostomi	Euteleostomi
ENSG00000091009	RBM27	5	0	Euteleostomi	Euteleostomi
ENSG00000091010	POU4F3	5	0	Euteleostomi	Euteleostomi
ENSG00000091039	OSBPL8	12	0	Euteleostomi	Euteleostomi
ENSG00000091073	DTX2	7	0	Euteleostomi	Euteleostomi
ENSG00000091127	PUS7	7	0	Euteleostomi	Euteleostomi
ENSG00000091128	LAMB4	7	0	Euteleostomi	Euteleostomi
ENSG00000091129	NRCAM	7	0	Euteleostomi	Euteleostomi
ENSG00000091136	LAMB1	7	0	Euteleostomi	Euteleostomi
ENSG00000091137	SLC26A4	7	0	Euteleostomi	Euteleostomi
ENSG00000091138	SLC26A3	7	0	Euteleostomi	Euteleostomi
ENSG00000091140	DLD	7	0	Euteleostomi	Euteleostomi
ENSG00000091157	WDR7	18	0	Euteleostomi	Euteleostomi
ENSG00000091164	TXNL1	18	0	Euteleostomi	Euteleostomi
ENSG00000091262	ABCC6	16	0	Euteleostomi	Euteleostomi
ENSG00000091409	ITGA6	2	0	Euteleostomi	Euteleostomi
ENSG00000091428	RAPGEF4	2	0	Euteleostomi	Euteleostomi
ENSG00000091436	MAP3K20	2	0	Euteleostomi	Euteleostomi
ENSG00000091483	FH	1	0	Euteleostomi	Euteleostomi
ENSG00000091513	TF	3	0	Euteleostomi	Euteleostomi
ENSG00000091536	MYO15A	17	0	Euteleostomi	Euteleostomi
ENSG00000091656	ZFHX4	8	0	Euteleostomi	Euteleostomi
ENSG00000091664	SLC17A6	11	0	Euteleostomi	Euteleostomi
ENSG00000091704	CPA1	7	0	Euteleostomi	Euteleostomi
ENSG00000091732	ZC3HC1	7	0	Euteleostomi	Euteleostomi
ENSG00000091831	ESR1	6	0	Euteleostomi	Euteleostomi
ENSG00000091879	ANGPT2	8	0	Euteleostomi	Euteleostomi
ENSG00000091947	TMEM101	17	0	Euteleostomi	Euteleostomi
ENSG00000091986	CCDC80	3	0	Euteleostomi	Euteleostomi
ENSG00000092020	PPP2R3C	14	0	Euteleostomi	Euteleostomi
ENSG00000092068	SLC7A8	14	0	Euteleostomi	Euteleostomi
ENSG00000092094	OSGEP	14	0	Euteleostomi	Euteleostomi
ENSG00000092098	RNF31	14	0	Euteleostomi	Euteleostomi
ENSG00000092108	SCFD1	14	0	Euteleostomi	Euteleostomi
ENSG00000092148	HECTD1	14	0	Euteleostomi	Euteleostomi
ENSG00000092201	SUPT16H	14	0	Euteleostomi	Euteleostomi
ENSG00000092203	TOX4	14	0	Euteleostomi	Euteleostomi
ENSG00000092295	TGM1	14	0	Euteleostomi	Euteleostomi
ENSG00000092421	SEMA6A	5	0	Euteleostomi	Euteleostomi
ENSG00000092439	TRPM7	15	0	Euteleostomi	Euteleostomi
ENSG00000092445	TYRO3	15	0	Euteleostomi	Euteleostomi
ENSG00000092470	WDR76	15	0	Euteleostomi	Euteleostomi
ENSG00000092529	CAPN3	15	0	Euteleostomi	Euteleostomi
ENSG00000092531	SNAP23	15	0	Euteleostomi	Euteleostomi
ENSG00000092607	TBX15	1	0	Euteleostomi	Euteleostomi
ENSG00000092758	COL9A3	20	0	Euteleostomi	Euteleostomi
ENSG00000092820	EZR	6	0	Euteleostomi	Euteleostomi
ENSG00000092847	AGO1	1	0	Euteleostomi	Euteleostomi
ENSG00000092853	CLSPN	1	0	Euteleostomi	Euteleostomi
ENSG00000092871	RFFL	17	0	Euteleostomi	Euteleostomi
ENSG00000092929	UNC13D	17	0	Euteleostomi	Euteleostomi
ENSG00000092931	MFSD11	17	0	Euteleostomi	Euteleostomi
ENSG00000092964	DPYSL2	8	0	Euteleostomi	Euteleostomi
ENSG00000092969	TGFB2	1	0	Euteleostomi	Euteleostomi
ENSG00000092978	GPATCH2	1	0	Euteleostomi	Euteleostomi
ENSG00000093000	NUP50	22	0	Euteleostomi	Euteleostomi
ENSG00000093009	CDC45	22	0	Euteleostomi	Euteleostomi
ENSG00000093072	ADA2	22	0	Euteleostomi	Euteleostomi
ENSG00000093144	ECHDC1	6	0	Euteleostomi	Euteleostomi
ENSG00000093167	LRRFIP2	3	0	Euteleostomi	Euteleostomi
ENSG00000093183	SEC22C	3	0	Euteleostomi	Euteleostomi
ENSG00000093217	XYLB	3	0	Euteleostomi	Euteleostomi
ENSG00000094631	HDAC6	X	0	Euteleostomi	Euteleostomi
ENSG00000094755	GABRP	5	0	Euteleostomi	Euteleostomi
ENSG00000094804	CDC6	17	0	Euteleostomi	Euteleostomi
ENSG00000094841	UPRT	X	0	Euteleostomi	Euteleostomi
ENSG00000094880	CDC23	5	0	Euteleostomi	Euteleostomi
ENSG00000094914	AAAS	12	0	Euteleostomi	Euteleostomi
ENSG00000094916	CBX5	12	0	Euteleostomi	Euteleostomi
ENSG00000094975	SUCO	1	0	Euteleostomi	Euteleostomi
ENSG00000095002	MSH2	2	0	Euteleostomi	Euteleostomi
ENSG00000095059	DHPS	19	0	Euteleostomi	Euteleostomi
ENSG00000095066	HOOK2	19	0	Euteleostomi	Euteleostomi
ENSG00000095139	ARCN1	11	0	Euteleostomi	Euteleostomi
ENSG00000095203	EPB41L4B	9	0	Euteleostomi	Euteleostomi
ENSG00000095261	PSMD5	9	0	Euteleostomi	Euteleostomi
ENSG00000095303	PTGS1	9	0	Euteleostomi	Euteleostomi
ENSG00000095319	NUP188	9	0	Euteleostomi	Euteleostomi
ENSG00000095321	CRAT	9	0	Euteleostomi	Euteleostomi
ENSG00000095370	SH2D3C	9	0	Euteleostomi	Euteleostomi
ENSG00000095380	NANS	9	0	Euteleostomi	Euteleostomi
ENSG00000095383	TBC1D2	9	0	Euteleostomi	Euteleostomi
ENSG00000095397	WHRN	9	0	Euteleostomi	Euteleostomi
ENSG00000095464	PDE6C	10	0	Euteleostomi	Euteleostomi
ENSG00000095485	CWF19L1	10	0	Euteleostomi	Euteleostomi
ENSG00000095539	SEMA4G	10	0	Euteleostomi	Euteleostomi
ENSG00000095564	BTAF1	10	0	Euteleostomi	Euteleostomi
ENSG00000095574	IKZF5	10	0	Euteleostomi	Euteleostomi
ENSG00000095585	BLNK	10	0	Euteleostomi	Euteleostomi
ENSG00000095596	CYP26A1	10	0	Euteleostomi	Euteleostomi
ENSG00000095627	TDRD1	10	0	Euteleostomi	Euteleostomi
ENSG00000095637	SORBS1	10	0	Euteleostomi	Euteleostomi
ENSG00000095713	CRTAC1	10	0	Euteleostomi	Euteleostomi
ENSG00000095739	BAMBI	10	0	Euteleostomi	Euteleostomi
ENSG00000095777	MYO3A	10	0	Euteleostomi	Euteleostomi
ENSG00000095787	WAC	10	0	Euteleostomi	Euteleostomi
ENSG00000095794	CREM	10	0	Euteleostomi	Euteleostomi
ENSG00000095906	NUBP2	16	0	Euteleostomi	Euteleostomi
ENSG00000095951	HIVEP1	6	0	Euteleostomi	Euteleostomi
ENSG00000096070	BRPF3	6	0	Euteleostomi	Euteleostomi
ENSG00000096080	MRPS18A	6	0	Euteleostomi	Euteleostomi
ENSG00000096093	EFHC1	6	0	Euteleostomi	Euteleostomi
ENSG00000096384	HSP90AB1	6	0	Euteleostomi	Euteleostomi
ENSG00000096401	CDC5L	6	0	Euteleostomi	Euteleostomi
ENSG00000096433	ITPR3	6	0	Euteleostomi	Euteleostomi
ENSG00000096696	DSP	6	0	Euteleostomi	Euteleostomi
ENSG00000096717	SIRT1	10	0	Euteleostomi	Euteleostomi
ENSG00000096746	HNRNPH3	10	0	Euteleostomi	Euteleostomi
ENSG00000096872	IFT74	9	0	Euteleostomi	Euteleostomi
ENSG00000096968	JAK2	9	0	Euteleostomi	Euteleostomi
ENSG00000097007	ABL1	9	0	Euteleostomi	Euteleostomi
ENSG00000097021	ACOT7	1	0	Euteleostomi	Euteleostomi
ENSG00000097046	CDC7	1	0	Euteleostomi	Euteleostomi
ENSG00000097096	SYDE2	1	0	Euteleostomi	Euteleostomi
ENSG00000099139	PCSK5	9	0	Euteleostomi	Euteleostomi
ENSG00000099194	SCD	10	0	Euteleostomi	Euteleostomi
ENSG00000099203	TMED1	19	0	Euteleostomi	Euteleostomi
ENSG00000099204	ABLIM1	10	0	Euteleostomi	Euteleostomi
ENSG00000099219	ERMP1	9	0	Euteleostomi	Euteleostomi
ENSG00000099246	RAB18	10	0	Euteleostomi	Euteleostomi
ENSG00000099250	NRP1	10	0	Euteleostomi	Euteleostomi
ENSG00000099256	PRTFDC1	10	0	Euteleostomi	Euteleostomi
ENSG00000099260	PALMD	1	0	Euteleostomi	Euteleostomi
ENSG00000099282	TSPAN15	10	0	Euteleostomi	Euteleostomi
ENSG00000099284	MACROH2A2	10	0	Euteleostomi	Euteleostomi
ENSG00000099308	MAST3	19	0	Euteleostomi	Euteleostomi
ENSG00000099331	MYO9B	19	0	Euteleostomi	Euteleostomi
ENSG00000099337	KCNK6	19	0	Euteleostomi	Euteleostomi
ENSG00000099341	PSMD8	19	0	Euteleostomi	Euteleostomi
ENSG00000099364	FBXL19	16	0	Euteleostomi	Euteleostomi
ENSG00000099365	STX1B	16	0	Euteleostomi	Euteleostomi
ENSG00000099377	HSD3B7	16	0	Euteleostomi	Euteleostomi
ENSG00000099381	SETD1A	16	0	Euteleostomi	Euteleostomi
ENSG00000099617	EFNA2	19	0	Euteleostomi	Euteleostomi
ENSG00000099622	CIRBP	19	0	Euteleostomi	Euteleostomi
ENSG00000099625	CBARP	19	0	Euteleostomi	Euteleostomi
ENSG00000099769	IGFALS	16	0	Euteleostomi	Euteleostomi
ENSG00000099783	HNRNPM	19	0	Euteleostomi	Euteleostomi
ENSG00000099785	MARCHF2	19	0	Euteleostomi	Euteleostomi
ENSG00000099797	TECR	19	0	Euteleostomi	Euteleostomi
ENSG00000099800	TIMM13	19	0	Euteleostomi	Euteleostomi
ENSG00000099804	CDC34	19	0	Euteleostomi	Euteleostomi
ENSG00000099810	MTAP	9	0	Euteleostomi	Euteleostomi
ENSG00000099814	CEP170B	14	0	Euteleostomi	Euteleostomi
ENSG00000099817	POLR2E	19	0	Euteleostomi	Euteleostomi
ENSG00000099821	POLRMT	19	0	Euteleostomi	Euteleostomi
ENSG00000099822	HCN2	19	0	Euteleostomi	Euteleostomi
ENSG00000099849	RASSF7	11	0	Euteleostomi	Euteleostomi
ENSG00000099864	PALM	19	0	Euteleostomi	Euteleostomi
ENSG00000099875	MKNK2	19	0	Euteleostomi	Euteleostomi
ENSG00000099889	ARVCF	22	0	Euteleostomi	Euteleostomi
ENSG00000099899	TRMT2A	22	0	Euteleostomi	Euteleostomi
ENSG00000099901	RANBP1	22	0	Euteleostomi	Euteleostomi
ENSG00000099904	ZDHHC8	22	0	Euteleostomi	Euteleostomi
ENSG00000099910	KLHL22	22	0	Euteleostomi	Euteleostomi
ENSG00000099917	MED15	22	0	Euteleostomi	Euteleostomi
ENSG00000099937	SERPIND1	22	0	Euteleostomi	Euteleostomi
ENSG00000099940	SNAP29	22	0	Euteleostomi	Euteleostomi
ENSG00000099942	CRKL	22	0	Euteleostomi	Euteleostomi
ENSG00000099954	CECR2	22	0	Euteleostomi	Euteleostomi
ENSG00000099956	SMARCB1	22	0	Euteleostomi	Euteleostomi
ENSG00000099968	BCL2L13	22	0	Euteleostomi	Euteleostomi
ENSG00000099991	CABIN1	22	0	Euteleostomi	Euteleostomi
ENSG00000099992	TBC1D10A	22	0	Euteleostomi	Euteleostomi
ENSG00000099995	SF3A1	22	0	Euteleostomi	Euteleostomi
ENSG00000099998	GGT5	22	0	Euteleostomi	Euteleostomi
ENSG00000100003	SEC14L2	22	0	Euteleostomi	Euteleostomi
ENSG00000100014	SPECC1L	22	0	Euteleostomi	Euteleostomi
ENSG00000100023	PPIL2	22	0	Euteleostomi	Euteleostomi
ENSG00000100024	UPB1	22	0	Euteleostomi	Euteleostomi
ENSG00000100027	YPEL1	22	0	Euteleostomi	Euteleostomi
ENSG00000100028	SNRPD3	22	0	Euteleostomi	Euteleostomi
ENSG00000100029	PES1	22	0	Euteleostomi	Euteleostomi
ENSG00000100030	MAPK1	22	0	Euteleostomi	Euteleostomi
ENSG00000100031	GGT1	22	0	Euteleostomi	Euteleostomi
ENSG00000100034	PPM1F	22	0	Euteleostomi	Euteleostomi
ENSG00000100036	SLC35E4	22	0	Euteleostomi	Euteleostomi
ENSG00000100038	TOP3B	22	0	Euteleostomi	Euteleostomi
ENSG00000100056	ESS2	22	0	Euteleostomi	Euteleostomi
ENSG00000100075	SLC25A1	22	0	Euteleostomi	Euteleostomi
ENSG00000100078	PLA2G3	22	0	Euteleostomi	Euteleostomi
ENSG00000100083	GGA1	22	0	Euteleostomi	Euteleostomi
ENSG00000100084	HIRA	22	0	Euteleostomi	Euteleostomi
ENSG00000100092	SH3BP1	22	0	Euteleostomi	Euteleostomi
ENSG00000100100	PIK3IP1	22	0	Euteleostomi	Euteleostomi
ENSG00000100105	PATZ1	22	0	Euteleostomi	Euteleostomi
ENSG00000100106	TRIOBP	22	0	Euteleostomi	Euteleostomi
ENSG00000100116	GCAT	22	0	Euteleostomi	Euteleostomi
ENSG00000100124	ANKRD54	22	0	Euteleostomi	Euteleostomi
ENSG00000100129	EIF3L	22	0	Euteleostomi	Euteleostomi
ENSG00000100138	SNU13	22	0	Euteleostomi	Euteleostomi
ENSG00000100139	MICALL1	22	0	Euteleostomi	Euteleostomi
ENSG00000100142	POLR2F	22	0	Euteleostomi	Euteleostomi
ENSG00000100146	SOX10	22	0	Euteleostomi	Euteleostomi
ENSG00000100147	CCDC134	22	0	Euteleostomi	Euteleostomi
ENSG00000100150	DEPDC5	22	0	Euteleostomi	Euteleostomi
ENSG00000100151	PICK1	22	0	Euteleostomi	Euteleostomi
ENSG00000100167	SEPTIN3	22	0	Euteleostomi	Euteleostomi
ENSG00000100170	SLC5A1	22	0	Euteleostomi	Euteleostomi
ENSG00000100196	KDELR3	22	0	Euteleostomi	Euteleostomi
ENSG00000100201	DDX17	22	0	Euteleostomi	Euteleostomi
ENSG00000100206	DMC1	22	0	Euteleostomi	Euteleostomi
ENSG00000100207	TCF20	22	0	Euteleostomi	Euteleostomi
ENSG00000100211	CBY1	22	0	Euteleostomi	Euteleostomi
ENSG00000100216	TOMM22	22	0	Euteleostomi	Euteleostomi
ENSG00000100220	RTCB	22	0	Euteleostomi	Euteleostomi
ENSG00000100221	JOSD1	22	0	Euteleostomi	Euteleostomi
ENSG00000100226	GTPBP1	22	0	Euteleostomi	Euteleostomi
ENSG00000100227	POLDIP3	22	0	Euteleostomi	Euteleostomi
ENSG00000100234	TIMP3	22	0	Euteleostomi	Euteleostomi
ENSG00000100239	PPP6R2	22	0	Euteleostomi	Euteleostomi
ENSG00000100241	SBF1	22	0	Euteleostomi	Euteleostomi
ENSG00000100246	DNAL4	22	0	Euteleostomi	Euteleostomi
ENSG00000100253	MIOX	22	0	Euteleostomi	Euteleostomi
ENSG00000100258	LMF2	22	0	Euteleostomi	Euteleostomi
ENSG00000100263	RHBDD3	22	0	Euteleostomi	Euteleostomi
ENSG00000100266	PACSIN2	22	0	Euteleostomi	Euteleostomi
ENSG00000100271	TTLL1	22	0	Euteleostomi	Euteleostomi
ENSG00000100280	AP1B1	22	0	Euteleostomi	Euteleostomi
ENSG00000100281	HMGXB4	22	0	Euteleostomi	Euteleostomi
ENSG00000100284	TOM1	22	0	Euteleostomi	Euteleostomi
ENSG00000100285	NEFH	22	0	Euteleostomi	Euteleostomi
ENSG00000100288	CHKB	22	0	Euteleostomi	Euteleostomi
ENSG00000100294	MCAT	22	0	Euteleostomi	Euteleostomi
ENSG00000100296	THOC5	22	0	Euteleostomi	Euteleostomi
ENSG00000100297	MCM5	22	0	Euteleostomi	Euteleostomi
ENSG00000100299	ARSA	22	0	Euteleostomi	Euteleostomi
ENSG00000100300	TSPO	22	0	Euteleostomi	Euteleostomi
ENSG00000100304	TTLL12	22	0	Euteleostomi	Euteleostomi
ENSG00000100314	CABP7	22	0	Euteleostomi	Euteleostomi
ENSG00000100316	RPL3	22	0	Euteleostomi	Euteleostomi
ENSG00000100319	ZMAT5	22	0	Euteleostomi	Euteleostomi
ENSG00000100320	RBFOX2	22	0	Euteleostomi	Euteleostomi
ENSG00000100321	SYNGR1	22	0	Euteleostomi	Euteleostomi
ENSG00000100324	TAB1	22	0	Euteleostomi	Euteleostomi
ENSG00000100325	ASCC2	22	0	Euteleostomi	Euteleostomi
ENSG00000100330	MTMR3	22	0	Euteleostomi	Euteleostomi
ENSG00000100335	MIEF1	22	0	Euteleostomi	Euteleostomi
ENSG00000100344	PNPLA3	22	0	Euteleostomi	Euteleostomi
ENSG00000100345	MYH9	22	0	Euteleostomi	Euteleostomi
ENSG00000100346	CACNA1I	22	0	Euteleostomi	Euteleostomi
ENSG00000100347	SAMM50	22	0	Euteleostomi	Euteleostomi
ENSG00000100350	FOXRED2	22	0	Euteleostomi	Euteleostomi
ENSG00000100351	GRAP2	22	0	Euteleostomi	Euteleostomi
ENSG00000100353	EIF3D	22	0	Euteleostomi	Euteleostomi
ENSG00000100354	TNRC6B	22	0	Euteleostomi	Euteleostomi
ENSG00000100359	SGSM3	22	0	Euteleostomi	Euteleostomi
ENSG00000100362	PVALB	22	0	Euteleostomi	Euteleostomi
ENSG00000100364	KIAA0930	22	0	Euteleostomi	Euteleostomi
ENSG00000100365	NCF4	22	0	Euteleostomi	Euteleostomi
ENSG00000100372	SLC25A17	22	0	Euteleostomi	Euteleostomi
ENSG00000100379	KCTD17	22	0	Euteleostomi	Euteleostomi
ENSG00000100380	ST13	22	0	Euteleostomi	Euteleostomi
ENSG00000100387	RBX1	22	0	Euteleostomi	Euteleostomi
ENSG00000100393	EP300	22	0	Euteleostomi	Euteleostomi
ENSG00000100395	L3MBTL2	22	0	Euteleostomi	Euteleostomi
ENSG00000100399	CHADL	22	0	Euteleostomi	Euteleostomi
ENSG00000100401	RANGAP1	22	0	Euteleostomi	Euteleostomi
ENSG00000100403	ZC3H7B	22	0	Euteleostomi	Euteleostomi
ENSG00000100410	PHF5A	22	0	Euteleostomi	Euteleostomi
ENSG00000100412	ACO2	22	0	Euteleostomi	Euteleostomi
ENSG00000100413	POLR3H	22	0	Euteleostomi	Euteleostomi
ENSG00000100416	TRMU	22	0	Euteleostomi	Euteleostomi
ENSG00000100417	PMM1	22	0	Euteleostomi	Euteleostomi
ENSG00000100418	DESI1	22	0	Euteleostomi	Euteleostomi
ENSG00000100422	CERK	22	0	Euteleostomi	Euteleostomi
ENSG00000100425	BRD1	22	0	Euteleostomi	Euteleostomi
ENSG00000100426	ZBED4	22	0	Euteleostomi	Euteleostomi
ENSG00000100427	MLC1	22	0	Euteleostomi	Euteleostomi
ENSG00000100429	HDAC10	22	0	Euteleostomi	Euteleostomi
ENSG00000100433	KCNK10	14	0	Euteleostomi	Euteleostomi
ENSG00000100439	ABHD4	14	0	Euteleostomi	Euteleostomi
ENSG00000100441	KHNYN	14	0	Euteleostomi	Euteleostomi
ENSG00000100442	FKBP3	14	0	Euteleostomi	Euteleostomi
ENSG00000100445	SDR39U1	14	0	Euteleostomi	Euteleostomi
ENSG00000100462	PRMT5	14	0	Euteleostomi	Euteleostomi
ENSG00000100478	AP4S1	14	0	Euteleostomi	Euteleostomi
ENSG00000100479	POLE2	14	0	Euteleostomi	Euteleostomi
ENSG00000100483	VCPKMT	14	0	Euteleostomi	Euteleostomi
ENSG00000100485	SOS2	14	0	Euteleostomi	Euteleostomi
ENSG00000100490	CDKL1	14	0	Euteleostomi	Euteleostomi
ENSG00000100503	NIN	14	0	Euteleostomi	Euteleostomi
ENSG00000100504	PYGL	14	0	Euteleostomi	Euteleostomi
ENSG00000100505	TRIM9	14	0	Euteleostomi	Euteleostomi
ENSG00000100519	PSMC6	14	0	Euteleostomi	Euteleostomi
ENSG00000100522	GNPNAT1	14	0	Euteleostomi	Euteleostomi
ENSG00000100523	DDHD1	14	0	Euteleostomi	Euteleostomi
ENSG00000100526	CDKN3	14	0	Euteleostomi	Euteleostomi
ENSG00000100528	CNIH1	14	0	Euteleostomi	Euteleostomi
ENSG00000100532	CGRRF1	14	0	Euteleostomi	Euteleostomi
ENSG00000100554	ATP6V1D	14	0	Euteleostomi	Euteleostomi
ENSG00000100558	PLEK2	14	0	Euteleostomi	Euteleostomi
ENSG00000100564	PIGH	14	0	Euteleostomi	Euteleostomi
ENSG00000100565	LRRC74A	14	0	Euteleostomi	Euteleostomi
ENSG00000100567	PSMA3	14	0	Euteleostomi	Euteleostomi
ENSG00000100568	VTI1B	14	0	Euteleostomi	Euteleostomi
ENSG00000100575	TIMM9	14	0	Euteleostomi	Euteleostomi
ENSG00000100580	TMED8	14	0	Euteleostomi	Euteleostomi
ENSG00000100591	AHSA1	14	0	Euteleostomi	Euteleostomi
ENSG00000100592	DAAM1	14	0	Euteleostomi	Euteleostomi
ENSG00000100593	ISM2	14	0	Euteleostomi	Euteleostomi
ENSG00000100596	SPTLC2	14	0	Euteleostomi	Euteleostomi
ENSG00000100600	LGMN	14	0	Euteleostomi	Euteleostomi
ENSG00000100603	SNW1	14	0	Euteleostomi	Euteleostomi
ENSG00000100605	ITPK1	14	0	Euteleostomi	Euteleostomi
ENSG00000100612	DHRS7	14	0	Euteleostomi	Euteleostomi
ENSG00000100614	PPM1A	14	0	Euteleostomi	Euteleostomi
ENSG00000100625	SIX4	14	0	Euteleostomi	Euteleostomi
ENSG00000100626	GALNT16	14	0	Euteleostomi	Euteleostomi
ENSG00000100628	ASB2	14	0	Euteleostomi	Euteleostomi
ENSG00000100632	ERH	14	0	Euteleostomi	Euteleostomi
ENSG00000100644	HIF1A	14	0	Euteleostomi	Euteleostomi
ENSG00000100647	SUSD6	14	0	Euteleostomi	Euteleostomi
ENSG00000100650	SRSF5	14	0	Euteleostomi	Euteleostomi
ENSG00000100652	SLC10A1	14	0	Euteleostomi	Euteleostomi
ENSG00000100664	EIF5	14	0	Euteleostomi	Euteleostomi
ENSG00000100678	SLC8A3	14	0	Euteleostomi	Euteleostomi
ENSG00000100697	DICER1	14	0	Euteleostomi	Euteleostomi
ENSG00000100711	ZFYVE21	14	0	Euteleostomi	Euteleostomi
ENSG00000100714	MTHFD1	14	0	Euteleostomi	Euteleostomi
ENSG00000100722	ZC3H14	14	0	Euteleostomi	Euteleostomi
ENSG00000100726	TELO2	16	0	Euteleostomi	Euteleostomi
ENSG00000100731	PCNX1	14	0	Euteleostomi	Euteleostomi
ENSG00000100739	BDKRB1	14	0	Euteleostomi	Euteleostomi
[truncated: 17,667 more rows]
