# Supplementary material for: Evolutionarily new genes in humans with disease phenotypes reveal functional enrichment patterns shaped by adaptive innovation and sexual selection
Source: bioRxiv preprint, doi:10.1101/2023.11.14.567139, version 7 (2024-09-04)
Supplement: Supplemental Table S2 [file 567139_file11.xlsx]

## Sheet: Sheet1
S2. HPO organ abnormality and genes
Phenotypes_abnormality	Symbol	HPO	HPO source	PhenotypeID (OP)
Abnormal_cellular_phenotype	AARS1	HP:0025354	ORPHA:33364	OP19
Abnormal_cellular_phenotype	AARS2	HP:0025354	OMIM:614096	OP19
Abnormal_cellular_phenotype	ACAD8	HP:0025354	ORPHA:79159	OP19
Abnormal_cellular_phenotype	ACAD9	HP:0025354	ORPHA:99901	OP19
Abnormal_cellular_phenotype	ACADM	HP:0025354	ORPHA:42	OP19
Abnormal_cellular_phenotype	ACD	HP:0025354	OMIM:616553	OP19
Abnormal_cellular_phenotype	ACTC1	HP:0025354	OMIM:613424	OP19
Abnormal_cellular_phenotype	ACTN2	HP:0025354	OMIM:612158	OP19
Abnormal_cellular_phenotype	ADA	HP:0025354	OMIM:102700	OP19
Abnormal_cellular_phenotype	ADA2	HP:0025354	OMIM:615688	OP19
Abnormal_cellular_phenotype	ADAM17	HP:0025354	OMIM:614328	OP19
Abnormal_cellular_phenotype	ADAMTS3	HP:0025354	ORPHA:2136	OP19
Abnormal_cellular_phenotype	AFG3L2	HP:0025354	ORPHA:313772	OP19
Abnormal_cellular_phenotype	AGK	HP:0025354	OMIM:212350	OP19
Abnormal_cellular_phenotype	AICDA	HP:0025354	OMIM:605258	OP19
Abnormal_cellular_phenotype	AIFM1	HP:0025354	OMIM:300816	OP19
Abnormal_cellular_phenotype	AK2	HP:0025354	ORPHA:33355	OP19
Abnormal_cellular_phenotype	AKT1	HP:0025354	ORPHA:2495	OP19
Abnormal_cellular_phenotype	ALB	HP:0025354	ORPHA:86816	OP19
Abnormal_cellular_phenotype	ALG12	HP:0025354	OMIM:607143	OP19
Abnormal_cellular_phenotype	ALPK3	HP:0025354	OMIM:618052	OP19
Abnormal_cellular_phenotype	AP3B1	HP:0025354	OMIM:608233	OP19
Abnormal_cellular_phenotype	ARHGEF1	HP:0025354	OMIM:618459	OP19
Abnormal_cellular_phenotype	ARSA	HP:0025354	OMIM:250100	OP19
Abnormal_cellular_phenotype	ARVCF	HP:0025354	ORPHA:567	OP19
Abnormal_cellular_phenotype	ASAH1	HP:0025354	OMIM:228000	OP19
Abnormal_cellular_phenotype	ATM	HP:0025354	OMIM:208900	OP19
Abnormal_cellular_phenotype	ATP5F1A	HP:0025354	OMIM:616045	OP19
Abnormal_cellular_phenotype	ATP5F1D	HP:0025354	OMIM:618120	OP19
Abnormal_cellular_phenotype	ATP5F1E	HP:0025354	OMIM:614053	OP19
Abnormal_cellular_phenotype	ATP6AP1	HP:0025354	OMIM:300972	OP19
Abnormal_cellular_phenotype	ATP6AP2	HP:0025354	OMIM:301045	OP19
Abnormal_cellular_phenotype	ATPAF2	HP:0025354	OMIM:604273	OP19
Abnormal_cellular_phenotype	ATXN2	HP:0025354	ORPHA:98756	OP19
Abnormal_cellular_phenotype	B2M	HP:0025354	OMIM:241600	OP19
Abnormal_cellular_phenotype	BACH2	HP:0025354	OMIM:618394	OP19
Abnormal_cellular_phenotype	BAP1	HP:0025354	ORPHA:2495	OP19
Abnormal_cellular_phenotype	BCL10	HP:0025354	OMIM:616098	OP19
Abnormal_cellular_phenotype	BCS1L	HP:0025354	OMIM:124000	OP19
Abnormal_cellular_phenotype	BLM	HP:0025354	OMIM:210900	OP19
Abnormal_cellular_phenotype	BLM	HP:0025354	ORPHA:125	OP19
Abnormal_cellular_phenotype	BLNK	HP:0025354	OMIM:613502	OP19
Abnormal_cellular_phenotype	BOLA3	HP:0025354	OMIM:614299	OP19
Abnormal_cellular_phenotype	BRCA1	HP:0025354	ORPHA:84	OP19
Abnormal_cellular_phenotype	BRCA2	HP:0025354	ORPHA:84	OP19
Abnormal_cellular_phenotype	BRIP1	HP:0025354	ORPHA:84	OP19
Abnormal_cellular_phenotype	BTK	HP:0025354	OMIM:300755	OP19
Abnormal_cellular_phenotype	BUB1B	HP:0025354	OMIM:176430	OP19
Abnormal_cellular_phenotype	BUB1B	HP:0025354	OMIM:257300	OP19
Abnormal_cellular_phenotype	C1QBP	HP:0025354	OMIM:617713	OP19
Abnormal_cellular_phenotype	CA2	HP:0025354	OMIM:259730	OP19
Abnormal_cellular_phenotype	CA2	HP:0025354	ORPHA:2785	OP19
Abnormal_cellular_phenotype	CACNA1S	HP:0025354	ORPHA:423	OP19
Abnormal_cellular_phenotype	CAMKMT	HP:0025354	ORPHA:163693	OP19
Abnormal_cellular_phenotype	CARD10	HP:0025354	OMIM:619632	OP19
Abnormal_cellular_phenotype	CARD11	HP:0025354	OMIM:617638	OP19
Abnormal_cellular_phenotype	CARD9	HP:0025354	OMIM:212050	OP19
Abnormal_cellular_phenotype	CARMIL2	HP:0025354	OMIM:618131	OP19
Abnormal_cellular_phenotype	CARS1	HP:0025354	ORPHA:33364	OP19
Abnormal_cellular_phenotype	CARS2	HP:0025354	OMIM:616672	OP19
Abnormal_cellular_phenotype	CARS2	HP:0025354	ORPHA:477774	OP19
Abnormal_cellular_phenotype	CASP10	HP:0025354	ORPHA:3261	OP19
Abnormal_cellular_phenotype	CASP8	HP:0025354	OMIM:607271	OP19
Abnormal_cellular_phenotype	CAVIN1	HP:0025354	OMIM:613327	OP19
Abnormal_cellular_phenotype	CCBE1	HP:0025354	ORPHA:2136	OP19
Abnormal_cellular_phenotype	CCND1	HP:0025354	ORPHA:29073	OP19
Abnormal_cellular_phenotype	CD19	HP:0025354	OMIM:240500	OP19
Abnormal_cellular_phenotype	CD247	HP:0025354	ORPHA:169160	OP19
Abnormal_cellular_phenotype	CD27	HP:0025354	OMIM:615122	OP19
Abnormal_cellular_phenotype	CD28	HP:0025354	ORPHA:3162	OP19
Abnormal_cellular_phenotype	CD320	HP:0025354	OMIM:613646	OP19
Abnormal_cellular_phenotype	CD3D	HP:0025354	ORPHA:169160	OP19
Abnormal_cellular_phenotype	CD3E	HP:0025354	ORPHA:169160	OP19
Abnormal_cellular_phenotype	CD3G	HP:0025354	OMIM:615607	OP19
Abnormal_cellular_phenotype	CD40	HP:0025354	OMIM:606843	OP19
Abnormal_cellular_phenotype	CD40LG	HP:0025354	OMIM:308230	OP19
Abnormal_cellular_phenotype	CD55	HP:0025354	OMIM:226300	OP19
Abnormal_cellular_phenotype	CD70	HP:0025354	OMIM:618261	OP19
Abnormal_cellular_phenotype	CD79A	HP:0025354	OMIM:613501	OP19
Abnormal_cellular_phenotype	CD79A	HP:0025354	ORPHA:33110	OP19
Abnormal_cellular_phenotype	CD79B	HP:0025354	OMIM:612692	OP19
Abnormal_cellular_phenotype	CD81	HP:0025354	OMIM:613496	OP19
Abnormal_cellular_phenotype	CDAN1	HP:0025354	OMIM:224120	OP19
Abnormal_cellular_phenotype	CDCA7	HP:0025354	OMIM:616910	OP19
Abnormal_cellular_phenotype	CDCA7	HP:0025354	ORPHA:2268	OP19
Abnormal_cellular_phenotype	CDK5	HP:0025354	OMIM:616342	OP19
Abnormal_cellular_phenotype	CDSN	HP:0025354	OMIM:270300	OP19
Abnormal_cellular_phenotype	CDSN	HP:0025354	ORPHA:90368	OP19
Abnormal_cellular_phenotype	CENATAC	HP:0025354	OMIM:620153	OP19
Abnormal_cellular_phenotype	CHCHD10	HP:0025354	OMIM:616209	OP19
Abnormal_cellular_phenotype	CHKB	HP:0025354	OMIM:602541	OP19
Abnormal_cellular_phenotype	CIITA	HP:0025354	ORPHA:572	OP19
Abnormal_cellular_phenotype	CISD2	HP:0025354	OMIM:604928	OP19
Abnormal_cellular_phenotype	CLCN7	HP:0025354	OMIM:166600	OP19
Abnormal_cellular_phenotype	CLN3	HP:0025354	OMIM:204200	OP19
Abnormal_cellular_phenotype	CLN5	HP:0025354	OMIM:256731	OP19
Abnormal_cellular_phenotype	CLN6	HP:0025354	OMIM:204300	OP19
Abnormal_cellular_phenotype	CLN8	HP:0025354	OMIM:600143	OP19
Abnormal_cellular_phenotype	CLN8	HP:0025354	ORPHA:1947	OP19
Abnormal_cellular_phenotype	CNBP	HP:0025354	OMIM:602668	OP19
Abnormal_cellular_phenotype	COA3	HP:0025354	OMIM:619058	OP19
Abnormal_cellular_phenotype	COA5	HP:0025354	OMIM:616500	OP19
Abnormal_cellular_phenotype	COA6	HP:0025354	OMIM:616501	OP19
Abnormal_cellular_phenotype	COA8	HP:0025354	OMIM:619061	OP19
Abnormal_cellular_phenotype	COG6	HP:0025354	OMIM:614576	OP19
Abnormal_cellular_phenotype	COL1A1	HP:0025354	ORPHA:1310	OP19
Abnormal_cellular_phenotype	COL7A1	HP:0025354	ORPHA:89842	OP19
Abnormal_cellular_phenotype	COMT	HP:0025354	ORPHA:567	OP19
Abnormal_cellular_phenotype	CORO1A	HP:0025354	OMIM:615401	OP19
Abnormal_cellular_phenotype	COX16	HP:0025354	OMIM:619355	OP19
Abnormal_cellular_phenotype	COX20	HP:0025354	OMIM:619054	OP19
Abnormal_cellular_phenotype	COX4I1	HP:0025354	OMIM:619060	OP19
Abnormal_cellular_phenotype	COX5A	HP:0025354	OMIM:619064	OP19
Abnormal_cellular_phenotype	COX6A2	HP:0025354	OMIM:619062	OP19
Abnormal_cellular_phenotype	CPT2	HP:0025354	OMIM:608836	OP19
Abnormal_cellular_phenotype	CPT2	HP:0025354	ORPHA:228305	OP19
Abnormal_cellular_phenotype	CPT2	HP:0025354	ORPHA:228308	OP19
Abnormal_cellular_phenotype	CR2	HP:0025354	OMIM:614699	OP19
Abnormal_cellular_phenotype	CRLS1	HP:0025354	OMIM:620167	OP19
Abnormal_cellular_phenotype	CSNK2A1	HP:0025354	OMIM:617062	OP19
Abnormal_cellular_phenotype	CTLA4	HP:0025354	OMIM:616100	OP19
Abnormal_cellular_phenotype	CTLA4	HP:0025354	ORPHA:436159	OP19
Abnormal_cellular_phenotype	CTNNBL1	HP:0025354	OMIM:619846	OP19
Abnormal_cellular_phenotype	CTNS	HP:0025354	OMIM:219800	OP19
Abnormal_cellular_phenotype	CTNS	HP:0025354	OMIM:219900	OP19
Abnormal_cellular_phenotype	CTPS1	HP:0025354	OMIM:615897	OP19
Abnormal_cellular_phenotype	CXCR4	HP:0025354	OMIM:193670	OP19
Abnormal_cellular_phenotype	CYBA	HP:0025354	OMIM:233690	OP19
Abnormal_cellular_phenotype	CYBB	HP:0025354	OMIM:306400	OP19
Abnormal_cellular_phenotype	CYC1	HP:0025354	OMIM:615453	OP19
Abnormal_cellular_phenotype	CYP27A1	HP:0025354	ORPHA:909	OP19
Abnormal_cellular_phenotype	DCLRE1B	HP:0025354	OMIM:620133	OP19
Abnormal_cellular_phenotype	DCLRE1C	HP:0025354	ORPHA:275	OP19
Abnormal_cellular_phenotype	DDB2	HP:0025354	OMIM:278740	OP19
Abnormal_cellular_phenotype	DEF6	HP:0025354	OMIM:619573	OP19
Abnormal_cellular_phenotype	DGCR2	HP:0025354	OMIM:192430	OP19
Abnormal_cellular_phenotype	DGCR6	HP:0025354	OMIM:192430	OP19
Abnormal_cellular_phenotype	DGCR8	HP:0025354	OMIM:192430	OP19
Abnormal_cellular_phenotype	DGUOK	HP:0025354	OMIM:251880	OP19
Abnormal_cellular_phenotype	DLAT	HP:0025354	OMIM:245348	OP19
Abnormal_cellular_phenotype	DLD	HP:0025354	ORPHA:2394	OP19
Abnormal_cellular_phenotype	DNA2	HP:0025354	ORPHA:352470	OP19
Abnormal_cellular_phenotype	DNAJC21	HP:0025354	OMIM:617052	OP19
Abnormal_cellular_phenotype	DNAJC30	HP:0025354	ORPHA:104	OP19
Abnormal_cellular_phenotype	DNAJC5	HP:0025354	OMIM:162350	OP19
Abnormal_cellular_phenotype	DNM1L	HP:0025354	ORPHA:330050	OP19
Abnormal_cellular_phenotype	DNMT1	HP:0025354	ORPHA:314404	OP19
Abnormal_cellular_phenotype	DNMT3B	HP:0025354	ORPHA:2268	OP19
Abnormal_cellular_phenotype	DOCK2	HP:0025354	OMIM:616433	OP19
Abnormal_cellular_phenotype	DOCK8	HP:0025354	OMIM:243700	OP19
Abnormal_cellular_phenotype	DOLK	HP:0025354	ORPHA:91131	OP19
Abnormal_cellular_phenotype	DSG1	HP:0025354	OMIM:615508	OP19
Abnormal_cellular_phenotype	DSP	HP:0025354	OMIM:605676	OP19
Abnormal_cellular_phenotype	EARS2	HP:0025354	OMIM:614924	OP19
Abnormal_cellular_phenotype	ECHS1	HP:0025354	OMIM:616277	OP19
Abnormal_cellular_phenotype	EGFR	HP:0025354	OMIM:616069	OP19
Abnormal_cellular_phenotype	EHHADH	HP:0025354	ORPHA:3337	OP19
Abnormal_cellular_phenotype	ELAC2	HP:0025354	OMIM:615440	OP19
Abnormal_cellular_phenotype	ELANE	HP:0025354	OMIM:202700	OP19
Abnormal_cellular_phenotype	EPG5	HP:0025354	OMIM:242840	OP19
Abnormal_cellular_phenotype	EPG5	HP:0025354	ORPHA:1493	OP19
Abnormal_cellular_phenotype	ERCC2	HP:0025354	OMIM:601675	OP19
Abnormal_cellular_phenotype	ERCC3	HP:0025354	OMIM:610651	OP19
Abnormal_cellular_phenotype	ERCC4	HP:0025354	OMIM:278760	OP19
Abnormal_cellular_phenotype	ERCC5	HP:0025354	OMIM:278780	OP19
Abnormal_cellular_phenotype	ERCC6	HP:0025354	OMIM:133540	OP19
Abnormal_cellular_phenotype	ERCC6	HP:0025354	OMIM:600630	OP19
Abnormal_cellular_phenotype	ERCC8	HP:0025354	OMIM:216400	OP19
Abnormal_cellular_phenotype	ERCC8	HP:0025354	OMIM:614621	OP19
Abnormal_cellular_phenotype	ESCO2	HP:0025354	OMIM:268300	OP19
Abnormal_cellular_phenotype	ESS2	HP:0025354	OMIM:192430	OP19
Abnormal_cellular_phenotype	ETFA	HP:0025354	OMIM:231680	OP19
Abnormal_cellular_phenotype	ETFB	HP:0025354	OMIM:231680	OP19
Abnormal_cellular_phenotype	ETFDH	HP:0025354	OMIM:231680	OP19
Abnormal_cellular_phenotype	EXTL3	HP:0025354	ORPHA:508533	OP19
Abnormal_cellular_phenotype	FANCA	HP:0025354	OMIM:227650	OP19
Abnormal_cellular_phenotype	FANCB	HP:0025354	OMIM:300514	OP19
Abnormal_cellular_phenotype	FANCB	HP:0025354	ORPHA:84	OP19
Abnormal_cellular_phenotype	FANCC	HP:0025354	OMIM:227645	OP19
Abnormal_cellular_phenotype	FANCD2	HP:0025354	OMIM:227646	OP19
Abnormal_cellular_phenotype	FANCE	HP:0025354	OMIM:600901	OP19
Abnormal_cellular_phenotype	FANCF	HP:0025354	ORPHA:84	OP19
Abnormal_cellular_phenotype	FANCG	HP:0025354	OMIM:614082	OP19
Abnormal_cellular_phenotype	FANCG	HP:0025354	ORPHA:84	OP19
Abnormal_cellular_phenotype	FANCI	HP:0025354	ORPHA:84	OP19
Abnormal_cellular_phenotype	FANCL	HP:0025354	ORPHA:84	OP19
Abnormal_cellular_phenotype	FANCM	HP:0025354	ORPHA:84	OP19
Abnormal_cellular_phenotype	FAS	HP:0025354	ORPHA:3261	OP19
Abnormal_cellular_phenotype	FASLG	HP:0025354	ORPHA:3261	OP19
Abnormal_cellular_phenotype	FAT4	HP:0025354	ORPHA:2136	OP19
Abnormal_cellular_phenotype	FBXL4	HP:0025354	OMIM:615471	OP19
Abnormal_cellular_phenotype	FCGR3A	HP:0025354	OMIM:615707	OP19
Abnormal_cellular_phenotype	FDX2	HP:0025354	OMIM:251900	OP19
Abnormal_cellular_phenotype	FDXR	HP:0025354	ORPHA:543470	OP19
Abnormal_cellular_phenotype	FH	HP:0025354	OMIM:606812	OP19
Abnormal_cellular_phenotype	FLAD1	HP:0025354	OMIM:255100	OP19
Abnormal_cellular_phenotype	FLNA	HP:0025354	ORPHA:99811	OP19
Abnormal_cellular_phenotype	FMR1	HP:0025354	OMIM:300624	OP19
Abnormal_cellular_phenotype	FMR1	HP:0025354	ORPHA:908	OP19
Abnormal_cellular_phenotype	FNIP1	HP:0025354	OMIM:619705	OP19
Abnormal_cellular_phenotype	FOXP3	HP:0025354	OMIM:304790	OP19
Abnormal_cellular_phenotype	FOXP3	HP:0025354	ORPHA:37042	OP19
Abnormal_cellular_phenotype	FOXRED1	HP:0025354	ORPHA:2609	OP19
Abnormal_cellular_phenotype	FUS	HP:0025354	ORPHA:275872	OP19
Abnormal_cellular_phenotype	FXN	HP:0025354	OMIM:229300	OP19
Abnormal_cellular_phenotype	GATA3	HP:0025354	ORPHA:2237	OP19
Abnormal_cellular_phenotype	GATC	HP:0025354	OMIM:618839	OP19
Abnormal_cellular_phenotype	GATM	HP:0025354	ORPHA:3337	OP19
Abnormal_cellular_phenotype	GBA1	HP:0025354	ORPHA:77259	OP19
Abnormal_cellular_phenotype	GBA1	HP:0025354	ORPHA:77261	OP19
Abnormal_cellular_phenotype	GFER	HP:0025354	OMIM:613076	OP19
Abnormal_cellular_phenotype	GFM1	HP:0025354	OMIM:609060	OP19
Abnormal_cellular_phenotype	GFM2	HP:0025354	OMIM:618397	OP19
Abnormal_cellular_phenotype	GGPS1	HP:0025354	OMIM:619518	OP19
Abnormal_cellular_phenotype	GJA1	HP:0025354	ORPHA:2248	OP19
Abnormal_cellular_phenotype	GLRX5	HP:0025354	OMIM:616859	OP19
Abnormal_cellular_phenotype	GLRX5	HP:0025354	ORPHA:401866	OP19
Abnormal_cellular_phenotype	GNE	HP:0025354	ORPHA:3166	OP19
Abnormal_cellular_phenotype	GNPTAB	HP:0025354	OMIM:252500	OP19
Abnormal_cellular_phenotype	GNPTAB	HP:0025354	OMIM:252600	OP19
Abnormal_cellular_phenotype	GNS	HP:0025354	OMIM:252940	OP19
Abnormal_cellular_phenotype	GP1BB	HP:0025354	ORPHA:567	OP19
Abnormal_cellular_phenotype	GPC3	HP:0025354	ORPHA:373	OP19
Abnormal_cellular_phenotype	GPC4	HP:0025354	ORPHA:373	OP19
Abnormal_cellular_phenotype	GPR35	HP:0025354	ORPHA:171	OP19
Abnormal_cellular_phenotype	GTF2E2	HP:0025354	ORPHA:33364	OP19
Abnormal_cellular_phenotype	GTF2H5	HP:0025354	ORPHA:33364	OP19
Abnormal_cellular_phenotype	GTPBP3	HP:0025354	OMIM:616198	OP19
Abnormal_cellular_phenotype	GTPBP3	HP:0025354	ORPHA:444013	OP19
Abnormal_cellular_phenotype	GYG1	HP:0025354	ORPHA:263297	OP19
Abnormal_cellular_phenotype	HACD1	HP:0025354	OMIM:619967	OP19
Abnormal_cellular_phenotype	HADH	HP:0025354	ORPHA:71212	OP19
Abnormal_cellular_phenotype	HADHA	HP:0025354	OMIM:609016	OP19
Abnormal_cellular_phenotype	HELLS	HP:0025354	OMIM:616911	OP19
Abnormal_cellular_phenotype	HELLS	HP:0025354	ORPHA:2268	OP19
Abnormal_cellular_phenotype	HGSNAT	HP:0025354	OMIM:252930	OP19
Abnormal_cellular_phenotype	HIBCH	HP:0025354	ORPHA:88639	OP19
Abnormal_cellular_phenotype	HIRA	HP:0025354	ORPHA:567	OP19
Abnormal_cellular_phenotype	HLA-DQA1	HP:0025354	OMIM:212750	OP19
Abnormal_cellular_phenotype	HLA-DQB1	HP:0025354	OMIM:212750	OP19
Abnormal_cellular_phenotype	HLA-DRB1	HP:0025354	OMIM:181000	OP19
Abnormal_cellular_phenotype	HSD17B10	HP:0025354	OMIM:300438	OP19
Abnormal_cellular_phenotype	HYOU1	HP:0025354	OMIM:233600	OP19
Abnormal_cellular_phenotype	IBA57	HP:0025354	OMIM:615330	OP19
Abnormal_cellular_phenotype	IBA57	HP:0025354	ORPHA:468661	OP19
Abnormal_cellular_phenotype	ICOS	HP:0025354	OMIM:240500	OP19
Abnormal_cellular_phenotype	ICOS	HP:0025354	OMIM:607594	OP19
Abnormal_cellular_phenotype	IFIH1	HP:0025354	OMIM:619773	OP19
Abnormal_cellular_phenotype	IFNGR1	HP:0025354	OMIM:209950	OP19
Abnormal_cellular_phenotype	IGHG2	HP:0025354	ORPHA:183675	OP19
Abnormal_cellular_phenotype	IGHM	HP:0025354	OMIM:601495	OP19
Abnormal_cellular_phenotype	IGKC	HP:0025354	ORPHA:183675	OP19
Abnormal_cellular_phenotype	IGLL1	HP:0025354	OMIM:613500	OP19
Abnormal_cellular_phenotype	IGLL1	HP:0025354	ORPHA:33110	OP19
Abnormal_cellular_phenotype	IKBKB	HP:0025354	OMIM:615592	OP19
Abnormal_cellular_phenotype	IKBKG	HP:0025354	OMIM:301081	OP19
Abnormal_cellular_phenotype	IKBKG	HP:0025354	ORPHA:98813	OP19
Abnormal_cellular_phenotype	IKZF1	HP:0025354	OMIM:616873	OP19
Abnormal_cellular_phenotype	IL12A	HP:0025354	ORPHA:186	OP19
Abnormal_cellular_phenotype	IL12RB1	HP:0025354	ORPHA:186	OP19
Abnormal_cellular_phenotype	IL17RA	HP:0025354	OMIM:613953	OP19
Abnormal_cellular_phenotype	IL21	HP:0025354	OMIM:615767	OP19
Abnormal_cellular_phenotype	IL21R	HP:0025354	OMIM:147050	OP19
Abnormal_cellular_phenotype	IL2RA	HP:0025354	OMIM:606367	OP19
Abnormal_cellular_phenotype	IL2RB	HP:0025354	OMIM:618495	OP19
Abnormal_cellular_phenotype	IL2RG	HP:0025354	OMIM:300400	OP19
Abnormal_cellular_phenotype	IL2RG	HP:0025354	OMIM:312863	OP19
Abnormal_cellular_phenotype	IL2RG	HP:0025354	ORPHA:276	OP19
Abnormal_cellular_phenotype	IL4R	HP:0025354	OMIM:147050	OP19
Abnormal_cellular_phenotype	IL6R	HP:0025354	OMIM:618944	OP19
Abnormal_cellular_phenotype	IL6ST	HP:0025354	OMIM:619752	OP19
Abnormal_cellular_phenotype	IL7R	HP:0025354	ORPHA:169154	OP19
Abnormal_cellular_phenotype	IPO8	HP:0025354	OMIM:619472	OP19
Abnormal_cellular_phenotype	IRAK4	HP:0025354	OMIM:607676	OP19
Abnormal_cellular_phenotype	IRF2BP2	HP:0025354	OMIM:617765	OP19
Abnormal_cellular_phenotype	IRF5	HP:0025354	ORPHA:186	OP19
Abnormal_cellular_phenotype	IRF8	HP:0025354	OMIM:226990	OP19
Abnormal_cellular_phenotype	ISCA2	HP:0025354	OMIM:616370	OP19
Abnormal_cellular_phenotype	ISCU	HP:0025354	OMIM:255125	OP19
Abnormal_cellular_phenotype	ITCH	HP:0025354	OMIM:613385	OP19
Abnormal_cellular_phenotype	ITK	HP:0025354	OMIM:613011	OP19
Abnormal_cellular_phenotype	IVNS1ABP	HP:0025354	OMIM:618969	OP19
Abnormal_cellular_phenotype	JAK3	HP:0025354	ORPHA:35078	OP19
Abnormal_cellular_phenotype	JMJD1C	HP:0025354	ORPHA:567	OP19
Abnormal_cellular_phenotype	KARS1	HP:0025354	OMIM:619147	OP19
Abnormal_cellular_phenotype	KCTD7	HP:0025354	OMIM:611726	OP19
Abnormal_cellular_phenotype	KIF23	HP:0025354	ORPHA:98870	OP19
Abnormal_cellular_phenotype	KLHDC8B	HP:0025354	OMIM:236000	OP19
Abnormal_cellular_phenotype	KLHL24	HP:0025354	OMIM:620236	OP19
Abnormal_cellular_phenotype	KNSTRN	HP:0025354	ORPHA:221139	OP19
Abnormal_cellular_phenotype	KRAS	HP:0025354	OMIM:614470	OP19
Abnormal_cellular_phenotype	KRT14	HP:0025354	ORPHA:79396	OP19
Abnormal_cellular_phenotype	KRT5	HP:0025354	ORPHA:79396	OP19
Abnormal_cellular_phenotype	KRT74	HP:0025354	ORPHA:90368	OP19
Abnormal_cellular_phenotype	KRT9	HP:0025354	OMIM:144200	OP19
Abnormal_cellular_phenotype	LAMTOR2	HP:0025354	OMIM:610798	OP19
Abnormal_cellular_phenotype	LAT	HP:0025354	OMIM:617514	OP19
Abnormal_cellular_phenotype	LBR	HP:0025354	OMIM:169400	OP19
Abnormal_cellular_phenotype	LCK	HP:0025354	OMIM:615758	OP19
Abnormal_cellular_phenotype	LCP2	HP:0025354	OMIM:619374	OP19
Abnormal_cellular_phenotype	LEP	HP:0025354	ORPHA:66628	OP19
Abnormal_cellular_phenotype	LEPR	HP:0025354	ORPHA:179494	OP19
Abnormal_cellular_phenotype	LIAS	HP:0025354	OMIM:614462	OP19
Abnormal_cellular_phenotype	LIG1	HP:0025354	OMIM:619774	OP19
Abnormal_cellular_phenotype	LIG3	HP:0025354	ORPHA:298	OP19
Abnormal_cellular_phenotype	LIG4	HP:0025354	OMIM:254500	OP19
Abnormal_cellular_phenotype	LMNA	HP:0025354	ORPHA:1662	OP19
Abnormal_cellular_phenotype	LMOD2	HP:0025354	OMIM:619897	OP19
Abnormal_cellular_phenotype	LRBA	HP:0025354	OMIM:614700	OP19
Abnormal_cellular_phenotype	LRP5	HP:0025354	OMIM:607634	OP19
Abnormal_cellular_phenotype	LRPPRC	HP:0025354	OMIM:220111	OP19
Abnormal_cellular_phenotype	LRPPRC	HP:0025354	ORPHA:70472	OP19
Abnormal_cellular_phenotype	LRRC8A	HP:0025354	OMIM:613506	OP19
Abnormal_cellular_phenotype	LRRC8A	HP:0025354	ORPHA:33110	OP19
Abnormal_cellular_phenotype	LYRM4	HP:0025354	OMIM:615595	OP19
Abnormal_cellular_phenotype	LYRM7	HP:0025354	OMIM:615838	OP19
Abnormal_cellular_phenotype	MAD2L2	HP:0025354	ORPHA:84	OP19
Abnormal_cellular_phenotype	MAGT1	HP:0025354	OMIM:300853	OP19
Abnormal_cellular_phenotype	MALT1	HP:0025354	OMIM:615468	OP19
Abnormal_cellular_phenotype	MAN2B1	HP:0025354	OMIM:248500	OP19
Abnormal_cellular_phenotype	MCM10	HP:0025354	OMIM:619313	OP19
Abnormal_cellular_phenotype	MCM4	HP:0025354	OMIM:609981	OP19
Abnormal_cellular_phenotype	MCOLN1	HP:0025354	OMIM:252650	OP19
Abnormal_cellular_phenotype	MCOLN1	HP:0025354	ORPHA:578	OP19
Abnormal_cellular_phenotype	MCPH1	HP:0025354	OMIM:251200	OP19
Abnormal_cellular_phenotype	MDM4	HP:0025354	OMIM:618849	OP19
Abnormal_cellular_phenotype	MECP2	HP:0025354	ORPHA:1762	OP19
Abnormal_cellular_phenotype	MECR	HP:0025354	ORPHA:508093	OP19
Abnormal_cellular_phenotype	MFF	HP:0025354	ORPHA:485421	OP19
Abnormal_cellular_phenotype	MGAT2	HP:0025354	ORPHA:79329	OP19
Abnormal_cellular_phenotype	MGME1	HP:0025354	OMIM:615084	OP19
Abnormal_cellular_phenotype	MIEF2	HP:0025354	OMIM:619024	OP19
Abnormal_cellular_phenotype	MMEL1	HP:0025354	ORPHA:186	OP19
Abnormal_cellular_phenotype	MMP1	HP:0025354	ORPHA:79408	OP19
Abnormal_cellular_phenotype	MOGS	HP:0025354	ORPHA:79330	OP19
Abnormal_cellular_phenotype	MPLKIP	HP:0025354	ORPHA:33364	OP19
Abnormal_cellular_phenotype	MPV17	HP:0025354	OMIM:256810	OP19
Abnormal_cellular_phenotype	MRE11	HP:0025354	OMIM:604391	OP19
Abnormal_cellular_phenotype	MRM2	HP:0025354	OMIM:618567	OP19
Abnormal_cellular_phenotype	MRPL12	HP:0025354	OMIM:618951	OP19
Abnormal_cellular_phenotype	MRPS14	HP:0025354	OMIM:618378	OP19
Abnormal_cellular_phenotype	MRPS16	HP:0025354	OMIM:610498	OP19
Abnormal_cellular_phenotype	MRPS22	HP:0025354	OMIM:611719	OP19
Abnormal_cellular_phenotype	MRPS23	HP:0025354	OMIM:618952	OP19
Abnormal_cellular_phenotype	MRPS25	HP:0025354	OMIM:619025	OP19
Abnormal_cellular_phenotype	MRTFA	HP:0025354	OMIM:618847	OP19
Abnormal_cellular_phenotype	MS4A1	HP:0025354	OMIM:613495	OP19
Abnormal_cellular_phenotype	MS4A2	HP:0025354	OMIM:147050	OP19
Abnormal_cellular_phenotype	MSN	HP:0025354	OMIM:300988	OP19
Abnormal_cellular_phenotype	MST1	HP:0025354	ORPHA:171	OP19
Abnormal_cellular_phenotype	MT-ATP6	HP:0025354	ORPHA:644	OP19
Abnormal_cellular_phenotype	MT-CO1	HP:0025354	ORPHA:550	OP19
Abnormal_cellular_phenotype	MT-CO2	HP:0025354	ORPHA:550	OP19
Abnormal_cellular_phenotype	MT-CO3	HP:0025354	ORPHA:550	OP19
Abnormal_cellular_phenotype	MT-CYB	HP:0025354	ORPHA:104	OP19
Abnormal_cellular_phenotype	MT-ND1	HP:0025354	ORPHA:2609	OP19
Abnormal_cellular_phenotype	MT-ND1	HP:0025354	ORPHA:550	OP19
Abnormal_cellular_phenotype	MT-ND2	HP:0025354	ORPHA:2609	OP19
Abnormal_cellular_phenotype	MT-ND3	HP:0025354	ORPHA:2609	OP19
Abnormal_cellular_phenotype	MT-ND4	HP:0025354	ORPHA:550	OP19
Abnormal_cellular_phenotype	MT-ND4L	HP:0025354	ORPHA:104	OP19
Abnormal_cellular_phenotype	MT-ND5	HP:0025354	ORPHA:550	OP19
Abnormal_cellular_phenotype	MT-ND6	HP:0025354	ORPHA:550	OP19
Abnormal_cellular_phenotype	MTFMT	HP:0025354	OMIM:614947	OP19
Abnormal_cellular_phenotype	MTHFD1	HP:0025354	OMIM:617780	OP19
Abnormal_cellular_phenotype	MTO1	HP:0025354	OMIM:614702	OP19
Abnormal_cellular_phenotype	MTOR	HP:0025354	OMIM:616638	OP19
Abnormal_cellular_phenotype	MTOR	HP:0025354	ORPHA:457485	OP19
Abnormal_cellular_phenotype	MTRFR	HP:0025354	OMIM:613559	OP19
Abnormal_cellular_phenotype	MUC5B	HP:0025354	OMIM:178500	OP19
Abnormal_cellular_phenotype	MVK	HP:0025354	OMIM:260920	OP19
Abnormal_cellular_phenotype	MVK	HP:0025354	OMIM:610377	OP19
Abnormal_cellular_phenotype	MYD88	HP:0025354	OMIM:153600	OP19
Abnormal_cellular_phenotype	MYD88	HP:0025354	ORPHA:33226	OP19
Abnormal_cellular_phenotype	MYH14	HP:0025354	ORPHA:397744	OP19
Abnormal_cellular_phenotype	MYH7	HP:0025354	ORPHA:59135	OP19
Abnormal_cellular_phenotype	MYSM1	HP:0025354	OMIM:618116	OP19
Abnormal_cellular_phenotype	NADK2	HP:0025354	ORPHA:431361	OP19
Abnormal_cellular_phenotype	NAE1	HP:0025354	OMIM:620210	OP19
Abnormal_cellular_phenotype	NARS2	HP:0025354	OMIM:616239	OP19
Abnormal_cellular_phenotype	NAXE	HP:0025354	OMIM:617186	OP19
Abnormal_cellular_phenotype	NBN	HP:0025354	ORPHA:647	OP19
Abnormal_cellular_phenotype	NCKAP1L	HP:0025354	OMIM:618982	OP19
Abnormal_cellular_phenotype	NDRG1	HP:0025354	OMIM:601455	OP19
Abnormal_cellular_phenotype	NDUFA1	HP:0025354	ORPHA:2609	OP19
Abnormal_cellular_phenotype	NDUFA10	HP:0025354	OMIM:618243	OP19
Abnormal_cellular_phenotype	NDUFA11	HP:0025354	ORPHA:2609	OP19
Abnormal_cellular_phenotype	NDUFA12	HP:0025354	OMIM:618244	OP19
Abnormal_cellular_phenotype	NDUFA13	HP:0025354	OMIM:618249	OP19
Abnormal_cellular_phenotype	NDUFA2	HP:0025354	OMIM:618235	OP19
Abnormal_cellular_phenotype	NDUFA4	HP:0025354	OMIM:619065	OP19
Abnormal_cellular_phenotype	NDUFA6	HP:0025354	ORPHA:2609	OP19
Abnormal_cellular_phenotype	NDUFA8	HP:0025354	OMIM:619272	OP19
Abnormal_cellular_phenotype	NDUFA9	HP:0025354	OMIM:618247	OP19
Abnormal_cellular_phenotype	NDUFAF1	HP:0025354	ORPHA:2609	OP19
Abnormal_cellular_phenotype	NDUFAF2	HP:0025354	ORPHA:2609	OP19
Abnormal_cellular_phenotype	NDUFAF3	HP:0025354	ORPHA:2609	OP19
Abnormal_cellular_phenotype	NDUFAF4	HP:0025354	ORPHA:2609	OP19
Abnormal_cellular_phenotype	NDUFAF5	HP:0025354	ORPHA:2609	OP19
Abnormal_cellular_phenotype	NDUFAF6	HP:0025354	ORPHA:3337	OP19
Abnormal_cellular_phenotype	NDUFAF8	HP:0025354	ORPHA:2609	OP19
Abnormal_cellular_phenotype	NDUFB10	HP:0025354	ORPHA:2609	OP19
Abnormal_cellular_phenotype	NDUFB11	HP:0025354	ORPHA:2609	OP19
Abnormal_cellular_phenotype	NDUFB3	HP:0025354	ORPHA:2609	OP19
Abnormal_cellular_phenotype	NDUFB7	HP:0025354	OMIM:620135	OP19
Abnormal_cellular_phenotype	NDUFB8	HP:0025354	OMIM:618252	OP19
Abnormal_cellular_phenotype	NDUFB9	HP:0025354	ORPHA:2609	OP19
Abnormal_cellular_phenotype	NDUFC2	HP:0025354	OMIM:619170	OP19
Abnormal_cellular_phenotype	NDUFS1	HP:0025354	ORPHA:2609	OP19
Abnormal_cellular_phenotype	NDUFS2	HP:0025354	ORPHA:2609	OP19
Abnormal_cellular_phenotype	NDUFS3	HP:0025354	ORPHA:2609	OP19
Abnormal_cellular_phenotype	NDUFS4	HP:0025354	ORPHA:2609	OP19
Abnormal_cellular_phenotype	NDUFS6	HP:0025354	ORPHA:2609	OP19
Abnormal_cellular_phenotype	NDUFS7	HP:0025354	ORPHA:2609	OP19
Abnormal_cellular_phenotype	NDUFS8	HP:0025354	ORPHA:2609	OP19
Abnormal_cellular_phenotype	NDUFV1	HP:0025354	ORPHA:2609	OP19
Abnormal_cellular_phenotype	NDUFV2	HP:0025354	ORPHA:2609	OP19
Abnormal_cellular_phenotype	NEB	HP:0025354	OMIM:256030	OP19
Abnormal_cellular_phenotype	NEUROG3	HP:0025354	ORPHA:83620	OP19
Abnormal_cellular_phenotype	NF2	HP:0025354	ORPHA:2495	OP19
Abnormal_cellular_phenotype	NFE2L2	HP:0025354	OMIM:617744	OP19
Abnormal_cellular_phenotype	NFKB1	HP:0025354	OMIM:616576	OP19
Abnormal_cellular_phenotype	NFKB1	HP:0025354	ORPHA:1572	OP19
Abnormal_cellular_phenotype	NFKB2	HP:0025354	OMIM:615577	OP19
Abnormal_cellular_phenotype	NFKBIA	HP:0025354	ORPHA:98813	OP19
Abnormal_cellular_phenotype	NFS1	HP:0025354	OMIM:619386	OP19
Abnormal_cellular_phenotype	NFU1	HP:0025354	OMIM:605711	OP19
Abnormal_cellular_phenotype	NHEJ1	HP:0025354	ORPHA:169079	OP19
Abnormal_cellular_phenotype	NHLRC2	HP:0025354	OMIM:618278	OP19
Abnormal_cellular_phenotype	NKX2-5	HP:0025354	ORPHA:2248	OP19
Abnormal_cellular_phenotype	NLRC4	HP:0025354	OMIM:616050	OP19
Abnormal_cellular_phenotype	NLRP1	HP:0025354	OMIM:617388	OP19
Abnormal_cellular_phenotype	NRAS	HP:0025354	OMIM:614470	OP19
Abnormal_cellular_phenotype	NSMCE3	HP:0025354	OMIM:617241	OP19
Abnormal_cellular_phenotype	NSUN3	HP:0025354	OMIM:619012	OP19
Abnormal_cellular_phenotype	NUBPL	HP:0025354	ORPHA:2609	OP19
Abnormal_cellular_phenotype	OAS1	HP:0025354	OMIM:618042	OP19
Abnormal_cellular_phenotype	OCRL	HP:0025354	OMIM:309000	OP19
Abnormal_cellular_phenotype	ORAI1	HP:0025354	OMIM:612782	OP19
Abnormal_cellular_phenotype	OTULIN	HP:0025354	OMIM:617099	OP19
Abnormal_cellular_phenotype	PALB2	HP:0025354	ORPHA:84	OP19
Abnormal_cellular_phenotype	PANX1	HP:0025354	OMIM:618550	OP19
Abnormal_cellular_phenotype	PARN	HP:0025354	OMIM:616353	OP19
Abnormal_cellular_phenotype	PARN	HP:0025354	OMIM:616371	OP19
Abnormal_cellular_phenotype	PATL2	HP:0025354	ORPHA:488191	OP19
Abnormal_cellular_phenotype	PDGFB	HP:0025354	ORPHA:2495	OP19
Abnormal_cellular_phenotype	PDHA1	HP:0025354	OMIM:312170	OP19
Abnormal_cellular_phenotype	PDHB	HP:0025354	ORPHA:255138	OP19
Abnormal_cellular_phenotype	PDHX	HP:0025354	OMIM:245349	OP19
Abnormal_cellular_phenotype	PDHX	HP:0025354	ORPHA:255182	OP19
Abnormal_cellular_phenotype	PDP1	HP:0025354	OMIM:608782	OP19
Abnormal_cellular_phenotype	PDP1	HP:0025354	ORPHA:79246	OP19
Abnormal_cellular_phenotype	PEPD	HP:0025354	OMIM:170100	OP19
Abnormal_cellular_phenotype	PET100	HP:0025354	OMIM:619055	OP19
Abnormal_cellular_phenotype	PET117	HP:0025354	OMIM:619063	OP19
Abnormal_cellular_phenotype	PEX5	HP:0025354	OMIM:214110	OP19
Abnormal_cellular_phenotype	PEX6	HP:0025354	OMIM:614862	OP19
Abnormal_cellular_phenotype	PGM3	HP:0025354	OMIM:615816	OP19
Abnormal_cellular_phenotype	PGM3	HP:0025354	ORPHA:443811	OP19
Abnormal_cellular_phenotype	PIGK	HP:0025354	OMIM:618879	OP19
Abnormal_cellular_phenotype	PIGM	HP:0025354	OMIM:610293	OP19
Abnormal_cellular_phenotype	PIGT	HP:0025354	ORPHA:369837	OP19
Abnormal_cellular_phenotype	PIK3C2A	HP:0025354	ORPHA:557003	OP19
Abnormal_cellular_phenotype	PIK3CA	HP:0025354	ORPHA:2495	OP19
Abnormal_cellular_phenotype	PIK3CD	HP:0025354	OMIM:619281	OP19
Abnormal_cellular_phenotype	PIK3CG	HP:0025354	OMIM:619802	OP19
Abnormal_cellular_phenotype	PIK3R1	HP:0025354	OMIM:616005	OP19
Abnormal_cellular_phenotype	PLA2G7	HP:0025354	OMIM:147050	OP19
Abnormal_cellular_phenotype	PLCG2	HP:0025354	OMIM:614878	OP19
Abnormal_cellular_phenotype	PLVAP	HP:0025354	OMIM:618183	OP19
Abnormal_cellular_phenotype	PMFBP1	HP:0025354	ORPHA:529970	OP19
Abnormal_cellular_phenotype	PMM2	HP:0025354	OMIM:212065	OP19
Abnormal_cellular_phenotype	PNP	HP:0025354	OMIM:613179	OP19
Abnormal_cellular_phenotype	PNPLA2	HP:0025354	ORPHA:565612	OP19
Abnormal_cellular_phenotype	PNPT1	HP:0025354	ORPHA:319514	OP19
Abnormal_cellular_phenotype	POLE	HP:0025354	OMIM:615139	OP19
Abnormal_cellular_phenotype	POLG	HP:0025354	OMIM:613662	OP19
Abnormal_cellular_phenotype	POLG2	HP:0025354	ORPHA:254892	OP19
Abnormal_cellular_phenotype	POMP	HP:0025354	OMIM:618048	OP19
Abnormal_cellular_phenotype	POT1	HP:0025354	OMIM:616568	OP19
Abnormal_cellular_phenotype	POU2AF1	HP:0025354	ORPHA:186	OP19
Abnormal_cellular_phenotype	PPM1B	HP:0025354	ORPHA:163693	OP19
Abnormal_cellular_phenotype	PREPL	HP:0025354	ORPHA:163693	OP19
Abnormal_cellular_phenotype	PRF1	HP:0025354	OMIM:603553	OP19
Abnormal_cellular_phenotype	PRF1	HP:0025354	ORPHA:540	OP19
Abnormal_cellular_phenotype	PRIM1	HP:0025354	OMIM:620005	OP19
Abnormal_cellular_phenotype	PRKCD	HP:0025354	ORPHA:3261	OP19
Abnormal_cellular_phenotype	PSAP	HP:0025354	OMIM:610539	OP19
Abnormal_cellular_phenotype	PSMB4	HP:0025354	OMIM:617591	OP19
Abnormal_cellular_phenotype	PSMB8	HP:0025354	OMIM:256040	OP19
Abnormal_cellular_phenotype	PSMB9	HP:0025354	OMIM:617591	OP19
Abnormal_cellular_phenotype	PSTPIP1	HP:0025354	ORPHA:69126	OP19
Abnormal_cellular_phenotype	PTCD3	HP:0025354	OMIM:619057	OP19
Abnormal_cellular_phenotype	PTEN	HP:0025354	OMIM:158350	OP19
Abnormal_cellular_phenotype	PTEN	HP:0025354	OMIM:605309	OP19
Abnormal_cellular_phenotype	PTEN	HP:0025354	ORPHA:397596	OP19
Abnormal_cellular_phenotype	PTPRC	HP:0025354	OMIM:619924	OP19
Abnormal_cellular_phenotype	PUS1	HP:0025354	OMIM:600462	OP19
Abnormal_cellular_phenotype	QRSL1	HP:0025354	OMIM:618835	OP19
Abnormal_cellular_phenotype	RAB27A	HP:0025354	OMIM:607624	OP19
Abnormal_cellular_phenotype	RAC2	HP:0025354	OMIM:618986	OP19
Abnormal_cellular_phenotype	RAC2	HP:0025354	OMIM:618987	OP19
Abnormal_cellular_phenotype	RACGAP1	HP:0025354	ORPHA:98870	OP19
Abnormal_cellular_phenotype	RAD50	HP:0025354	OMIM:613078	OP19
Abnormal_cellular_phenotype	RAD51	HP:0025354	ORPHA:84	OP19
Abnormal_cellular_phenotype	RAD51C	HP:0025354	ORPHA:84	OP19
Abnormal_cellular_phenotype	RAG1	HP:0025354	OMIM:233650	OP19
Abnormal_cellular_phenotype	RAG1	HP:0025354	ORPHA:331206	OP19
Abnormal_cellular_phenotype	RAG2	HP:0025354	OMIM:233650	OP19
Abnormal_cellular_phenotype	RAG2	HP:0025354	ORPHA:331206	OP19
Abnormal_cellular_phenotype	RAI1	HP:0025354	ORPHA:1713	OP19
Abnormal_cellular_phenotype	RARS2	HP:0025354	OMIM:611523	OP19
Abnormal_cellular_phenotype	RASGRP1	HP:0025354	OMIM:618534	OP19
Abnormal_cellular_phenotype	RASGRP1	HP:0025354	ORPHA:3261	OP19
Abnormal_cellular_phenotype	RBM8A	HP:0025354	OMIM:274000	OP19
Abnormal_cellular_phenotype	REL	HP:0025354	OMIM:619652	OP19
Abnormal_cellular_phenotype	RELA	HP:0025354	ORPHA:251636	OP19
Abnormal_cellular_phenotype	RFWD3	HP:0025354	ORPHA:84	OP19
Abnormal_cellular_phenotype	RFX5	HP:0025354	ORPHA:572	OP19
Abnormal_cellular_phenotype	RFXANK	HP:0025354	ORPHA:572	OP19
Abnormal_cellular_phenotype	RFXAP	HP:0025354	ORPHA:572	OP19
Abnormal_cellular_phenotype	RHAG	HP:0025354	OMIM:185000	OP19
Abnormal_cellular_phenotype	RIPK1	HP:0025354	OMIM:618108	OP19
Abnormal_cellular_phenotype	RNF113A	HP:0025354	OMIM:300953	OP19
Abnormal_cellular_phenotype	RNF168	HP:0025354	OMIM:611943	OP19
Abnormal_cellular_phenotype	RNF168	HP:0025354	ORPHA:420741	OP19
Abnormal_cellular_phenotype	RPA1	HP:0025354	OMIM:619767	OP19
Abnormal_cellular_phenotype	RPL3L	HP:0025354	OMIM:619371	OP19
Abnormal_cellular_phenotype	RREB1	HP:0025354	ORPHA:567	OP19
Abnormal_cellular_phenotype	RRM2B	HP:0025354	OMIM:612075	OP19
Abnormal_cellular_phenotype	RTEL1	HP:0025354	OMIM:615190	OP19
Abnormal_cellular_phenotype	RYR1	HP:0025354	ORPHA:423	OP19
Abnormal_cellular_phenotype	SAMD9L	HP:0025354	ORPHA:2585	OP19
Abnormal_cellular_phenotype	SASH3	HP:0025354	OMIM:301082	OP19
Abnormal_cellular_phenotype	SCARB2	HP:0025354	ORPHA:77259	OP19
Abnormal_cellular_phenotype	SCN4A	HP:0025354	OMIM:620351	OP19
Abnormal_cellular_phenotype	SCO1	HP:0025354	OMIM:619048	OP19
Abnormal_cellular_phenotype	SCO2	HP:0025354	OMIM:604377	OP19
Abnormal_cellular_phenotype	SDHA	HP:0025354	OMIM:252011	OP19
Abnormal_cellular_phenotype	SDHA	HP:0025354	OMIM:613642	OP19
Abnormal_cellular_phenotype	SDHB	HP:0025354	OMIM:619224	OP19
Abnormal_cellular_phenotype	SDHD	HP:0025354	OMIM:619167	OP19
Abnormal_cellular_phenotype	SEC23B	HP:0025354	OMIM:224100	OP19
Abnormal_cellular_phenotype	SEC24C	HP:0025354	ORPHA:567	OP19
Abnormal_cellular_phenotype	SEMA4D	HP:0025354	ORPHA:171	OP19
Abnormal_cellular_phenotype	SETX	HP:0025354	OMIM:606002	OP19
Abnormal_cellular_phenotype	SFTPA2	HP:0025354	OMIM:178500	OP19
Abnormal_cellular_phenotype	SFTPC	HP:0025354	OMIM:178500	OP19
Abnormal_cellular_phenotype	SFXN4	HP:0025354	OMIM:615578	OP19
Abnormal_cellular_phenotype	SH2D1A	HP:0025354	OMIM:308240	OP19
Abnormal_cellular_phenotype	SH3KBP1	HP:0025354	OMIM:300310	OP19
Abnormal_cellular_phenotype	SHH	HP:0025354	OMIM:147250	OP19
Abnormal_cellular_phenotype	SIK3	HP:0025354	OMIM:618162	OP19
Abnormal_cellular_phenotype	SKIC2	HP:0025354	ORPHA:84064	OP19
Abnormal_cellular_phenotype	SKIC3	HP:0025354	OMIM:222470	OP19
Abnormal_cellular_phenotype	SLC25A10	HP:0025354	OMIM:618972	OP19
Abnormal_cellular_phenotype	SLC25A13	HP:0025354	ORPHA:247598	OP19
Abnormal_cellular_phenotype	SLC25A20	HP:0025354	ORPHA:159	OP19
Abnormal_cellular_phenotype	SLC25A26	HP:0025354	OMIM:616794	OP19
Abnormal_cellular_phenotype	SLC25A3	HP:0025354	ORPHA:91130	OP19
Abnormal_cellular_phenotype	SLC25A4	HP:0025354	OMIM:615418	OP19
Abnormal_cellular_phenotype	SLC25A4	HP:0025354	OMIM:617184	OP19
Abnormal_cellular_phenotype	SLC2A1	HP:0025354	ORPHA:168577	OP19
Abnormal_cellular_phenotype	SLC34A1	HP:0025354	ORPHA:3337	OP19
Abnormal_cellular_phenotype	SLC35C1	HP:0025354	ORPHA:99843	OP19
Abnormal_cellular_phenotype	SLC39A4	HP:0025354	OMIM:201100	OP19
Abnormal_cellular_phenotype	SLC39A7	HP:0025354	OMIM:619693	OP19
Abnormal_cellular_phenotype	SLC39A7	HP:0025354	ORPHA:33110	OP19
Abnormal_cellular_phenotype	SLC39A8	HP:0025354	ORPHA:468699	OP19
Abnormal_cellular_phenotype	SLC3A1	HP:0025354	ORPHA:163693	OP19
Abnormal_cellular_phenotype	SLC46A1	HP:0025354	ORPHA:90045	OP19
Abnormal_cellular_phenotype	SLC5A6	HP:0025354	OMIM:618973	OP19
Abnormal_cellular_phenotype	SLC7A7	HP:0025354	ORPHA:470	OP19
Abnormal_cellular_phenotype	SLF2	HP:0025354	OMIM:620184	OP19
Abnormal_cellular_phenotype	SLX4	HP:0025354	ORPHA:84	OP19
Abnormal_cellular_phenotype	SMARCAL1	HP:0025354	OMIM:242900	OP19
Abnormal_cellular_phenotype	SMARCB1	HP:0025354	ORPHA:2495	OP19
Abnormal_cellular_phenotype	SMARCE1	HP:0025354	ORPHA:2495	OP19
Abnormal_cellular_phenotype	SMO	HP:0025354	ORPHA:2495	OP19
Abnormal_cellular_phenotype	SON	HP:0025354	ORPHA:500150	OP19
Abnormal_cellular_phenotype	SP110	HP:0025354	OMIM:235550	OP19
Abnormal_cellular_phenotype	SPG7	HP:0025354	ORPHA:99013	OP19
Abnormal_cellular_phenotype	SPI1	HP:0025354	OMIM:619707	OP19
Abnormal_cellular_phenotype	SPIB	HP:0025354	ORPHA:186	OP19
Abnormal_cellular_phenotype	SPINK5	HP:0025354	OMIM:256500	OP19
Abnormal_cellular_phenotype	SPPL2A	HP:0025354	OMIM:619549	OP19
Abnormal_cellular_phenotype	SQSTM1	HP:0025354	ORPHA:275872	OP19
Abnormal_cellular_phenotype	SRP54	HP:0025354	OMIM:618752	OP19
Abnormal_cellular_phenotype	STAT1	HP:0025354	OMIM:614162	OP19
Abnormal_cellular_phenotype	STAT2	HP:0025354	OMIM:616636	OP19
Abnormal_cellular_phenotype	STAT3	HP:0025354	OMIM:147060	OP19
Abnormal_cellular_phenotype	STAT3	HP:0025354	ORPHA:2314	OP19
Abnormal_cellular_phenotype	STAT5B	HP:0025354	OMIM:618985	OP19
Abnormal_cellular_phenotype	STIM1	HP:0025354	OMIM:612783	OP19
Abnormal_cellular_phenotype	STING1	HP:0025354	OMIM:615934	OP19
Abnormal_cellular_phenotype	STX11	HP:0025354	ORPHA:540	OP19
Abnormal_cellular_phenotype	STXBP2	HP:0025354	OMIM:613101	OP19
Abnormal_cellular_phenotype	SUCLA2	HP:0025354	OMIM:612073	OP19
Abnormal_cellular_phenotype	SUCLG1	HP:0025354	OMIM:245400	OP19
Abnormal_cellular_phenotype	SUCLG1	HP:0025354	ORPHA:17	OP19
Abnormal_cellular_phenotype	SUFU	HP:0025354	ORPHA:2495	OP19
Abnormal_cellular_phenotype	SUN5	HP:0025354	ORPHA:529970	OP19
Abnormal_cellular_phenotype	SYK	HP:0025354	OMIM:619381	OP19
Abnormal_cellular_phenotype	TAFAZZIN	HP:0025354	OMIM:302060	OP19
Abnormal_cellular_phenotype	TAFAZZIN	HP:0025354	ORPHA:111	OP19
Abnormal_cellular_phenotype	TARDBP	HP:0025354	ORPHA:275872	OP19
Abnormal_cellular_phenotype	TARS1	HP:0025354	ORPHA:33364	OP19
Abnormal_cellular_phenotype	TBK1	HP:0025354	ORPHA:275872	OP19
Abnormal_cellular_phenotype	TBX1	HP:0025354	OMIM:188400	OP19
Abnormal_cellular_phenotype	TBX1	HP:0025354	OMIM:192430	OP19
Abnormal_cellular_phenotype	TBX1	HP:0025354	ORPHA:567	OP19
Abnormal_cellular_phenotype	TCF3	HP:0025354	OMIM:619824	OP19
Abnormal_cellular_phenotype	TCF4	HP:0025354	ORPHA:171	OP19
Abnormal_cellular_phenotype	TCN2	HP:0025354	OMIM:275350	OP19
Abnormal_cellular_phenotype	TCN2	HP:0025354	ORPHA:859	OP19
Abnormal_cellular_phenotype	TERT	HP:0025354	ORPHA:2495	OP19
Abnormal_cellular_phenotype	TET2	HP:0025354	OMIM:619126	OP19
Abnormal_cellular_phenotype	TFRC	HP:0025354	OMIM:616740	OP19
Abnormal_cellular_phenotype	TGFB1	HP:0025354	OMIM:618213	OP19
Abnormal_cellular_phenotype	TIMM22	HP:0025354	OMIM:618851	OP19
Abnormal_cellular_phenotype	TIMM50	HP:0025354	ORPHA:505216	OP19
Abnormal_cellular_phenotype	TIMM8A	HP:0025354	ORPHA:52368	OP19
Abnormal_cellular_phenotype	TIMMDC1	HP:0025354	ORPHA:2609	OP19
Abnormal_cellular_phenotype	TINF2	HP:0025354	OMIM:268130	OP19
Abnormal_cellular_phenotype	TK2	HP:0025354	OMIM:609560	OP19
Abnormal_cellular_phenotype	TLR8	HP:0025354	OMIM:301078	OP19
Abnormal_cellular_phenotype	TMEM126B	HP:0025354	OMIM:618250	OP19
Abnormal_cellular_phenotype	TMEM185A	HP:0025354	ORPHA:100974	OP19
Abnormal_cellular_phenotype	TMEM70	HP:0025354	OMIM:614052	OP19
Abnormal_cellular_phenotype	TNFRSF11A	HP:0025354	OMIM:612301	OP19
Abnormal_cellular_phenotype	TNFRSF11B	HP:0025354	OMIM:239000	OP19
Abnormal_cellular_phenotype	TNFRSF13B	HP:0025354	OMIM:240500	OP19
Abnormal_cellular_phenotype	TNFRSF13C	HP:0025354	OMIM:240500	OP19
Abnormal_cellular_phenotype	TNFRSF13C	HP:0025354	OMIM:613494	OP19
Abnormal_cellular_phenotype	TNFRSF1B	HP:0025354	ORPHA:3162	OP19
Abnormal_cellular_phenotype	TNFRSF9	HP:0025354	OMIM:620282	OP19
Abnormal_cellular_phenotype	TNFSF12	HP:0025354	ORPHA:1572	OP19
Abnormal_cellular_phenotype	TNFSF15	HP:0025354	ORPHA:186	OP19
Abnormal_cellular_phenotype	TNNI3	HP:0025354	OMIM:611880	OP19
Abnormal_cellular_phenotype	TNNT2	HP:0025354	OMIM:612422	OP19
Abnormal_cellular_phenotype	TNPO3	HP:0025354	ORPHA:186	OP19
Abnormal_cellular_phenotype	TOM1	HP:0025354	OMIM:619510	OP19
Abnormal_cellular_phenotype	TONSL	HP:0025354	OMIM:271510	OP19
Abnormal_cellular_phenotype	TOP3A	HP:0025354	OMIM:618097	OP19
Abnormal_cellular_phenotype	TP53	HP:0025354	OMIM:618165	OP19
Abnormal_cellular_phenotype	TPP1	HP:0025354	OMIM:204500	OP19
Abnormal_cellular_phenotype	TPP2	HP:0025354	OMIM:619220	OP19
Abnormal_cellular_phenotype	TRAF7	HP:0025354	ORPHA:2495	OP19
Abnormal_cellular_phenotype	TRIP13	HP:0025354	OMIM:617598	OP19
Abnormal_cellular_phenotype	TRIT1	HP:0025354	OMIM:617873	OP19
Abnormal_cellular_phenotype	TRMT5	HP:0025354	OMIM:616539	OP19
Abnormal_cellular_phenotype	TRMU	HP:0025354	ORPHA:254864	OP19
Abnormal_cellular_phenotype	TRNT1	HP:0025354	OMIM:616084	OP19
Abnormal_cellular_phenotype	TSC1	HP:0025354	OMIM:191100	OP19
Abnormal_cellular_phenotype	TSFM	HP:0025354	OMIM:610505	OP19
Abnormal_cellular_phenotype	TTC19	HP:0025354	OMIM:615157	OP19
Abnormal_cellular_phenotype	TTC7A	HP:0025354	OMIM:243150	OP19
Abnormal_cellular_phenotype	TTN	HP:0025354	OMIM:611705	OP19
Abnormal_cellular_phenotype	TUBB8	HP:0025354	ORPHA:488191	OP19
Abnormal_cellular_phenotype	TWNK	HP:0025354	ORPHA:254892	OP19
Abnormal_cellular_phenotype	TXN2	HP:0025354	OMIM:616811	OP19
Abnormal_cellular_phenotype	TXN2	HP:0025354	ORPHA:478029	OP19
Abnormal_cellular_phenotype	TYK2	HP:0025354	OMIM:611521	OP19
Abnormal_cellular_phenotype	TYMP	HP:0025354	ORPHA:298	OP19
Abnormal_cellular_phenotype	TYMS	HP:0025354	OMIM:620040	OP19
Abnormal_cellular_phenotype	UBE2T	HP:0025354	ORPHA:84	OP19
Abnormal_cellular_phenotype	UFD1	HP:0025354	ORPHA:567	OP19
Abnormal_cellular_phenotype	UMPS	HP:0025354	OMIM:258900	OP19
Abnormal_cellular_phenotype	UMPS	HP:0025354	ORPHA:30	OP19
Abnormal_cellular_phenotype	UNC13D	HP:0025354	OMIM:608898	OP19
Abnormal_cellular_phenotype	UNC13D	HP:0025354	ORPHA:540	OP19
Abnormal_cellular_phenotype	UNG	HP:0025354	OMIM:608106	OP19
Abnormal_cellular_phenotype	UQCC2	HP:0025354	OMIM:615824	OP19
Abnormal_cellular_phenotype	UQCC3	HP:0025354	OMIM:616111	OP19
Abnormal_cellular_phenotype	UQCRB	HP:0025354	OMIM:615158	OP19
Abnormal_cellular_phenotype	UQCRH	HP:0025354	OMIM:620137	OP19
Abnormal_cellular_phenotype	UQCRQ	HP:0025354	OMIM:615159	OP19
Abnormal_cellular_phenotype	UVSSA	HP:0025354	OMIM:614640	OP19
Abnormal_cellular_phenotype	VARS2	HP:0025354	OMIM:615917	OP19
Abnormal_cellular_phenotype	VCL	HP:0025354	OMIM:613255	OP19
Abnormal_cellular_phenotype	VCP	HP:0025354	ORPHA:275872	OP19
Abnormal_cellular_phenotype	VPS33A	HP:0025354	ORPHA:505248	OP19
Abnormal_cellular_phenotype	VPS45	HP:0025354	OMIM:615285	OP19
Abnormal_cellular_phenotype	WAS	HP:0025354	OMIM:301000	OP19
Abnormal_cellular_phenotype	WAS	HP:0025354	OMIM:313900	OP19
Abnormal_cellular_phenotype	WEE2	HP:0025354	ORPHA:488191	OP19
Abnormal_cellular_phenotype	WIPF1	HP:0025354	OMIM:614493	OP19
Abnormal_cellular_phenotype	WRAP53	HP:0025354	OMIM:613988	OP19
Abnormal_cellular_phenotype	XIAP	HP:0025354	OMIM:308240	OP19
Abnormal_cellular_phenotype	XPA	HP:0025354	OMIM:278700	OP19
Abnormal_cellular_phenotype	XPC	HP:0025354	OMIM:278720	OP19
Abnormal_cellular_phenotype	XRCC2	HP:0025354	ORPHA:84	OP19
Abnormal_cellular_phenotype	XRCC4	HP:0025354	ORPHA:99812	OP19
Abnormal_cellular_phenotype	YARS2	HP:0025354	OMIM:613561	OP19
Abnormal_cellular_phenotype	ZAP70	HP:0025354	OMIM:617006	OP19
Abnormal_cellular_phenotype	ZBTB24	HP:0025354	OMIM:614069	OP19
Abnormal_cellular_phenotype	ZCCHC8	HP:0025354	OMIM:618674	OP19
Abnormal_cellular_phenotype	ZEB2	HP:0025354	ORPHA:261537	OP19
Abnormal_cellular_phenotype	ZEB2	HP:0025354	ORPHA:261552	OP19
Abnormal_cellular_phenotype	ZFTA	HP:0025354	ORPHA:251636	OP19
Abnormal_cellular_phenotype	ZMPSTE24	HP:0025354	ORPHA:1662	OP19
Abnormal_cellular_phenotype	ZNF341	HP:0025354	OMIM:618282	OP19
Abnormal_cellular_phenotype	ZP2	HP:0025354	OMIM:618353	OP19
Abnormality_of_blood_and_blood-forming_tissues	AAGAB	HP:0001871	ORPHA:79501	OP15
Abnormality_of_blood_and_blood-forming_tissues	AARS1	HP:0001871	ORPHA:33364	OP15
Abnormality_of_blood_and_blood-forming_tissues	AASS	HP:0001871	OMIM:238700	OP15
Abnormality_of_blood_and_blood-forming_tissues	ABCA1	HP:0001871	ORPHA:31150	OP15
Abnormality_of_blood_and_blood-forming_tissues	ABCB6	HP:0001871	ORPHA:90044	OP15
Abnormality_of_blood_and_blood-forming_tissues	ABCB7	HP:0001871	OMIM:301310	OP15
Abnormality_of_blood_and_blood-forming_tissues	ABCC2	HP:0001871	ORPHA:234	OP15
Abnormality_of_blood_and_blood-forming_tissues	ABCC6	HP:0001871	OMIM:177850	OP15
Abnormality_of_blood_and_blood-forming_tissues	ABCC6	HP:0001871	OMIM:264800	OP15
Abnormality_of_blood_and_blood-forming_tissues	ABCC6	HP:0001871	ORPHA:758	OP15
Abnormality_of_blood_and_blood-forming_tissues	ABCC8	HP:0001871	ORPHA:552	OP15
Abnormality_of_blood_and_blood-forming_tissues	ABCC8	HP:0001871	ORPHA:79134	OP15
Abnormality_of_blood_and_blood-forming_tissues	ABCC9	HP:0001871	ORPHA:334	OP15
Abnormality_of_blood_and_blood-forming_tissues	ABCD3	HP:0001871	OMIM:616278	OP15
Abnormality_of_blood_and_blood-forming_tissues	ABCD4	HP:0001871	OMIM:614857	OP15
Abnormality_of_blood_and_blood-forming_tissues	ABCG8	HP:0001871	OMIM:210250	OP15
Abnormality_of_blood_and_blood-forming_tissues	ABHD5	HP:0001871	ORPHA:98907	OP15
Abnormality_of_blood_and_blood-forming_tissues	ABL1	HP:0001871	OMIM:608232	OP15
Abnormality_of_blood_and_blood-forming_tissues	ACAD8	HP:0001871	OMIM:611283	OP15
Abnormality_of_blood_and_blood-forming_tissues	ACAD9	HP:0001871	ORPHA:99901	OP15
Abnormality_of_blood_and_blood-forming_tissues	ACAT1	HP:0001871	ORPHA:134	OP15
Abnormality_of_blood_and_blood-forming_tissues	ACD	HP:0001871	OMIM:616553	OP15
Abnormality_of_blood_and_blood-forming_tissues	ACD	HP:0001871	ORPHA:3322	OP15
Abnormality_of_blood_and_blood-forming_tissues	ACP5	HP:0001871	OMIM:607944	OP15
Abnormality_of_blood_and_blood-forming_tissues	ACP5	HP:0001871	ORPHA:1855	OP15
Abnormality_of_blood_and_blood-forming_tissues	ACSL4	HP:0001871	ORPHA:86818	OP15
Abnormality_of_blood_and_blood-forming_tissues	ACTA1	HP:0001871	OMIM:620278	OP15
Abnormality_of_blood_and_blood-forming_tissues	ACTA2	HP:0001871	ORPHA:91387	OP15
Abnormality_of_blood_and_blood-forming_tissues	ACTC1	HP:0001871	ORPHA:154	OP15
Abnormality_of_blood_and_blood-forming_tissues	ACTN1	HP:0001871	OMIM:615193	OP15
Abnormality_of_blood_and_blood-forming_tissues	ACTN2	HP:0001871	ORPHA:154	OP15
Abnormality_of_blood_and_blood-forming_tissues	ACTN4	HP:0001871	OMIM:603278	OP15
Abnormality_of_blood_and_blood-forming_tissues	ACVR1	HP:0001871	ORPHA:337	OP15
Abnormality_of_blood_and_blood-forming_tissues	ACVRL1	HP:0001871	ORPHA:774	OP15
Abnormality_of_blood_and_blood-forming_tissues	ADA	HP:0001871	ORPHA:277	OP15
Abnormality_of_blood_and_blood-forming_tissues	ADA2	HP:0001871	ORPHA:124	OP15
Abnormality_of_blood_and_blood-forming_tissues	ADAM17	HP:0001871	OMIM:614328	OP15
Abnormality_of_blood_and_blood-forming_tissues	ADAMTS13	HP:0001871	OMIM:274150	OP15
Abnormality_of_blood_and_blood-forming_tissues	ADAMTS2	HP:0001871	OMIM:225410	OP15
Abnormality_of_blood_and_blood-forming_tissues	ADAMTS3	HP:0001871	ORPHA:2136	OP15
Abnormality_of_blood_and_blood-forming_tissues	ADAMTSL2	HP:0001871	ORPHA:1901	OP15
Abnormality_of_blood_and_blood-forming_tissues	ADAR	HP:0001871	ORPHA:51	OP15
Abnormality_of_blood_and_blood-forming_tissues	ADH5	HP:0001871	OMIM:619151	OP15
Abnormality_of_blood_and_blood-forming_tissues	ADK	HP:0001871	OMIM:614300	OP15
Abnormality_of_blood_and_blood-forming_tissues	AEBP1	HP:0001871	OMIM:618000	OP15
Abnormality_of_blood_and_blood-forming_tissues	AEBP1	HP:0001871	ORPHA:536532	OP15
Abnormality_of_blood_and_blood-forming_tissues	AGA	HP:0001871	OMIM:208400	OP15
Abnormality_of_blood_and_blood-forming_tissues	AGGF1	HP:0001871	ORPHA:90308	OP15
Abnormality_of_blood_and_blood-forming_tissues	AGK	HP:0001871	OMIM:212350	OP15
Abnormality_of_blood_and_blood-forming_tissues	AGR2	HP:0001871	OMIM:620233	OP15
Abnormality_of_blood_and_blood-forming_tissues	AGXT	HP:0001871	ORPHA:93598	OP15
Abnormality_of_blood_and_blood-forming_tissues	AHCY	HP:0001871	ORPHA:88618	OP15
Abnormality_of_blood_and_blood-forming_tissues	AICDA	HP:0001871	OMIM:605258	OP15
Abnormality_of_blood_and_blood-forming_tissues	AIP	HP:0001871	OMIM:219090	OP15
Abnormality_of_blood_and_blood-forming_tissues	AK1	HP:0001871	OMIM:612631	OP15
Abnormality_of_blood_and_blood-forming_tissues	AK2	HP:0001871	OMIM:267500	OP15
Abnormality_of_blood_and_blood-forming_tissues	AKR1D1	HP:0001871	ORPHA:79303	OP15
Abnormality_of_blood_and_blood-forming_tissues	AKT1	HP:0001871	ORPHA:744	OP15
Abnormality_of_blood_and_blood-forming_tissues	ALAD	HP:0001871	ORPHA:100924	OP15
Abnormality_of_blood_and_blood-forming_tissues	ALAS2	HP:0001871	OMIM:300751	OP15
Abnormality_of_blood_and_blood-forming_tissues	ALB	HP:0001871	ORPHA:86816	OP15
Abnormality_of_blood_and_blood-forming_tissues	ALDOA	HP:0001871	OMIM:611881	OP15
Abnormality_of_blood_and_blood-forming_tissues	ALDOB	HP:0001871	OMIM:229600	OP15
Abnormality_of_blood_and_blood-forming_tissues	ALG1	HP:0001871	ORPHA:79327	OP15
Abnormality_of_blood_and_blood-forming_tissues	ALG12	HP:0001871	ORPHA:79324	OP15
Abnormality_of_blood_and_blood-forming_tissues	ALG13	HP:0001871	OMIM:300884	OP15
Abnormality_of_blood_and_blood-forming_tissues	ALG2	HP:0001871	OMIM:607906	OP15
Abnormality_of_blood_and_blood-forming_tissues	ALG3	HP:0001871	ORPHA:79321	OP15
Abnormality_of_blood_and_blood-forming_tissues	ALG6	HP:0001871	ORPHA:79320	OP15
Abnormality_of_blood_and_blood-forming_tissues	ALG8	HP:0001871	ORPHA:79325	OP15
Abnormality_of_blood_and_blood-forming_tissues	ALPK1	HP:0001871	OMIM:614979	OP15
Abnormality_of_blood_and_blood-forming_tissues	ALPL	HP:0001871	OMIM:241500	OP15
Abnormality_of_blood_and_blood-forming_tissues	ALX4	HP:0001871	ORPHA:52022	OP15
Abnormality_of_blood_and_blood-forming_tissues	AMACR	HP:0001871	OMIM:214950	OP15
Abnormality_of_blood_and_blood-forming_tissues	AMMECR1	HP:0001871	OMIM:300990	OP15
Abnormality_of_blood_and_blood-forming_tissues	AMMECR1	HP:0001871	ORPHA:86818	OP15
Abnormality_of_blood_and_blood-forming_tissues	AMN	HP:0001871	ORPHA:35858	OP15
Abnormality_of_blood_and_blood-forming_tissues	ANAPC1	HP:0001871	ORPHA:221008	OP15
Abnormality_of_blood_and_blood-forming_tissues	ANGPTL6	HP:0001871	ORPHA:231160	OP15
Abnormality_of_blood_and_blood-forming_tissues	ANK1	HP:0001871	OMIM:182900	OP15
Abnormality_of_blood_and_blood-forming_tissues	ANK1	HP:0001871	ORPHA:251066	OP15
Abnormality_of_blood_and_blood-forming_tissues	ANK1	HP:0001871	ORPHA:822	OP15
Abnormality_of_blood_and_blood-forming_tissues	ANKRD1	HP:0001871	ORPHA:154	OP15
Abnormality_of_blood_and_blood-forming_tissues	ANKRD11	HP:0001871	ORPHA:261250	OP15
Abnormality_of_blood_and_blood-forming_tissues	ANKRD26	HP:0001871	OMIM:188000	OP15
Abnormality_of_blood_and_blood-forming_tissues	ANKRD55	HP:0001871	ORPHA:85408	OP15
Abnormality_of_blood_and_blood-forming_tissues	ANO6	HP:0001871	OMIM:262890	OP15
Abnormality_of_blood_and_blood-forming_tissues	AP1S3	HP:0001871	ORPHA:247353	OP15
Abnormality_of_blood_and_blood-forming_tissues	AP3B1	HP:0001871	OMIM:608233	OP15
Abnormality_of_blood_and_blood-forming_tissues	AP3D1	HP:0001871	OMIM:617050	OP15
Abnormality_of_blood_and_blood-forming_tissues	APC	HP:0001871	ORPHA:873	OP15
Abnormality_of_blood_and_blood-forming_tissues	APC2	HP:0001871	ORPHA:821	OP15
Abnormality_of_blood_and_blood-forming_tissues	APOB	HP:0001871	OMIM:615558	OP15
Abnormality_of_blood_and_blood-forming_tissues	APOE	HP:0001871	OMIM:603075	OP15
Abnormality_of_blood_and_blood-forming_tissues	APP	HP:0001871	ORPHA:100006	OP15
Abnormality_of_blood_and_blood-forming_tissues	APP	HP:0001871	ORPHA:324703	OP15
Abnormality_of_blood_and_blood-forming_tissues	APP	HP:0001871	ORPHA:324708	OP15
Abnormality_of_blood_and_blood-forming_tissues	APP	HP:0001871	ORPHA:324713	OP15
Abnormality_of_blood_and_blood-forming_tissues	APPL1	HP:0001871	OMIM:616511	OP15
Abnormality_of_blood_and_blood-forming_tissues	APPL1	HP:0001871	ORPHA:552	OP15
Abnormality_of_blood_and_blood-forming_tissues	ARF1	HP:0001871	ORPHA:98892	OP15
Abnormality_of_blood_and_blood-forming_tissues	ARFGEF2	HP:0001871	ORPHA:98892	OP15
Abnormality_of_blood_and_blood-forming_tissues	ARHGAP26	HP:0001871	OMIM:607785	OP15
Abnormality_of_blood_and_blood-forming_tissues	ARHGAP31	HP:0001871	ORPHA:974	OP15
Abnormality_of_blood_and_blood-forming_tissues	ARHGEF1	HP:0001871	OMIM:618459	OP15
Abnormality_of_blood_and_blood-forming_tissues	ARL6IP6	HP:0001871	ORPHA:1556	OP15
Abnormality_of_blood_and_blood-forming_tissues	ARMC5	HP:0001871	ORPHA:189427	OP15
Abnormality_of_blood_and_blood-forming_tissues	ARPC1B	HP:0001871	OMIM:617718	OP15
Abnormality_of_blood_and_blood-forming_tissues	ARVCF	HP:0001871	ORPHA:567	OP15
Abnormality_of_blood_and_blood-forming_tissues	ASAH1	HP:0001871	ORPHA:333	OP15
Abnormality_of_blood_and_blood-forming_tissues	ASXL1	HP:0001871	ORPHA:98850	OP15
Abnormality_of_blood_and_blood-forming_tissues	ATM	HP:0001871	OMIM:208900	OP15
Abnormality_of_blood_and_blood-forming_tissues	ATOH7	HP:0001871	ORPHA:91495	OP15
Abnormality_of_blood_and_blood-forming_tissues	ATP11A	HP:0001871	OMIM:619851	OP15
Abnormality_of_blood_and_blood-forming_tissues	ATP11C	HP:0001871	OMIM:301015	OP15
Abnormality_of_blood_and_blood-forming_tissues	ATP5F1A	HP:0001871	OMIM:620358	OP15
Abnormality_of_blood_and_blood-forming_tissues	ATP6AP1	HP:0001871	OMIM:300972	OP15
Abnormality_of_blood_and_blood-forming_tissues	ATP6AP2	HP:0001871	OMIM:301045	OP15
Abnormality_of_blood_and_blood-forming_tissues	ATP6V0A2	HP:0001871	ORPHA:357074	OP15
Abnormality_of_blood_and_blood-forming_tissues	ATP6V1A	HP:0001871	ORPHA:357074	OP15
Abnormality_of_blood_and_blood-forming_tissues	ATP6V1B2	HP:0001871	ORPHA:79500	OP15
Abnormality_of_blood_and_blood-forming_tissues	ATP6V1E1	HP:0001871	ORPHA:357074	OP15
Abnormality_of_blood_and_blood-forming_tissues	ATP7A	HP:0001871	ORPHA:565	OP15
Abnormality_of_blood_and_blood-forming_tissues	ATP7B	HP:0001871	OMIM:277900	OP15
Abnormality_of_blood_and_blood-forming_tissues	ATP7B	HP:0001871	ORPHA:905	OP15
Abnormality_of_blood_and_blood-forming_tissues	ATP8B1	HP:0001871	OMIM:211600	OP15
Abnormality_of_blood_and_blood-forming_tissues	ATPAF2	HP:0001871	OMIM:604273	OP15
Abnormality_of_blood_and_blood-forming_tissues	ATR	HP:0001871	OMIM:210600	OP15
Abnormality_of_blood_and_blood-forming_tissues	ATRX	HP:0001871	ORPHA:231401	OP15
Abnormality_of_blood_and_blood-forming_tissues	B2M	HP:0001871	OMIM:241600	OP15
Abnormality_of_blood_and_blood-forming_tissues	B3GALT6	HP:0001871	ORPHA:536467	OP15
Abnormality_of_blood_and_blood-forming_tissues	B4GALT1	HP:0001871	ORPHA:79332	OP15
Abnormality_of_blood_and_blood-forming_tissues	BACH2	HP:0001871	OMIM:618394	OP15
Abnormality_of_blood_and_blood-forming_tissues	BAG3	HP:0001871	ORPHA:154	OP15
Abnormality_of_blood_and_blood-forming_tissues	BAG5	HP:0001871	ORPHA:154	OP15
Abnormality_of_blood_and_blood-forming_tissues	BANK1	HP:0001871	ORPHA:536	OP15
Abnormality_of_blood_and_blood-forming_tissues	BAP1	HP:0001871	ORPHA:39044	OP15
Abnormality_of_blood_and_blood-forming_tissues	BAX	HP:0001871	OMIM:613065	OP15
Abnormality_of_blood_and_blood-forming_tissues	BCL10	HP:0001871	OMIM:616098	OP15
Abnormality_of_blood_and_blood-forming_tissues	BCL11A	HP:0001871	ORPHA:251380	OP15
Abnormality_of_blood_and_blood-forming_tissues	BCL11B	HP:0001871	OMIM:617237	OP15
Abnormality_of_blood_and_blood-forming_tissues	BCL2	HP:0001871	ORPHA:545	OP15
Abnormality_of_blood_and_blood-forming_tissues	BCL6	HP:0001871	ORPHA:545	OP15
Abnormality_of_blood_and_blood-forming_tissues	BCOR	HP:0001871	ORPHA:520	OP15
Abnormality_of_blood_and_blood-forming_tissues	BCR	HP:0001871	OMIM:608232	OP15
Abnormality_of_blood_and_blood-forming_tissues	BEST1	HP:0001871	OMIM:193220	OP15
Abnormality_of_blood_and_blood-forming_tissues	BGN	HP:0001871	OMIM:300989	OP15
Abnormality_of_blood_and_blood-forming_tissues	BICD2	HP:0001871	OMIM:618291	OP15
Abnormality_of_blood_and_blood-forming_tissues	BIRC3	HP:0001871	ORPHA:52417	OP15
Abnormality_of_blood_and_blood-forming_tissues	BLK	HP:0001871	ORPHA:552	OP15
Abnormality_of_blood_and_blood-forming_tissues	BLM	HP:0001871	ORPHA:125	OP15
Abnormality_of_blood_and_blood-forming_tissues	BLNK	HP:0001871	OMIM:613502	OP15
Abnormality_of_blood_and_blood-forming_tissues	BLNK	HP:0001871	ORPHA:33110	OP15
Abnormality_of_blood_and_blood-forming_tissues	BLOC1S3	HP:0001871	OMIM:614077	OP15
Abnormality_of_blood_and_blood-forming_tissues	BLOC1S5	HP:0001871	OMIM:619172	OP15
Abnormality_of_blood_and_blood-forming_tissues	BLOC1S6	HP:0001871	OMIM:614171	OP15
Abnormality_of_blood_and_blood-forming_tissues	BMPR1A	HP:0001871	ORPHA:157794	OP15
Abnormality_of_blood_and_blood-forming_tissues	BMPR1A	HP:0001871	ORPHA:79076	OP15
Abnormality_of_blood_and_blood-forming_tissues	BMPR2	HP:0001871	OMIM:178600	OP15
Abnormality_of_blood_and_blood-forming_tissues	BMS1	HP:0001871	ORPHA:1114	OP15
Abnormality_of_blood_and_blood-forming_tissues	BPGM	HP:0001871	OMIM:222800	OP15
Abnormality_of_blood_and_blood-forming_tissues	BRAF	HP:0001871	ORPHA:96253	OP15
Abnormality_of_blood_and_blood-forming_tissues	BRCA1	HP:0001871	ORPHA:84	OP15
Abnormality_of_blood_and_blood-forming_tissues	BRCA2	HP:0001871	OMIM:605724	OP15
Abnormality_of_blood_and_blood-forming_tissues	BRCC3	HP:0001871	ORPHA:280679	OP15
Abnormality_of_blood_and_blood-forming_tissues	BRD4	HP:0001871	ORPHA:443167	OP15
Abnormality_of_blood_and_blood-forming_tissues	BRIP1	HP:0001871	OMIM:609054	OP15
Abnormality_of_blood_and_blood-forming_tissues	BSCL2	HP:0001871	OMIM:269700	OP15
Abnormality_of_blood_and_blood-forming_tissues	BTK	HP:0001871	OMIM:300755	OP15
Abnormality_of_blood_and_blood-forming_tissues	BTK	HP:0001871	ORPHA:47	OP15
Abnormality_of_blood_and_blood-forming_tissues	BTNL2	HP:0001871	ORPHA:797	OP15
Abnormality_of_blood_and_blood-forming_tissues	BUB1	HP:0001871	ORPHA:1052	OP15
Abnormality_of_blood_and_blood-forming_tissues	BUB1B	HP:0001871	OMIM:257300	OP15
Abnormality_of_blood_and_blood-forming_tissues	BUB3	HP:0001871	ORPHA:1052	OP15
Abnormality_of_blood_and_blood-forming_tissues	C1GALT1C1	HP:0001871	OMIM:300622	OP15
Abnormality_of_blood_and_blood-forming_tissues	C1QB	HP:0001871	OMIM:620321	OP15
Abnormality_of_blood_and_blood-forming_tissues	C1R	HP:0001871	OMIM:130080	OP15
Abnormality_of_blood_and_blood-forming_tissues	C1S	HP:0001871	OMIM:617174	OP15
Abnormality_of_blood_and_blood-forming_tissues	C2	HP:0001871	OMIM:217000	OP15
Abnormality_of_blood_and_blood-forming_tissues	C2orf69	HP:0001871	OMIM:619423	OP15
Abnormality_of_blood_and_blood-forming_tissues	C3	HP:0001871	OMIM:612925	OP15
Abnormality_of_blood_and_blood-forming_tissues	C4A	HP:0001871	ORPHA:117	OP15
Abnormality_of_blood_and_blood-forming_tissues	C4B	HP:0001871	ORPHA:536	OP15
Abnormality_of_blood_and_blood-forming_tissues	CA2	HP:0001871	ORPHA:2785	OP15
Abnormality_of_blood_and_blood-forming_tissues	CACNA1D	HP:0001871	ORPHA:369929	OP15
Abnormality_of_blood_and_blood-forming_tissues	CACNA1S	HP:0001871	ORPHA:423	OP15
Abnormality_of_blood_and_blood-forming_tissues	CAD	HP:0001871	OMIM:616457	OP15
Abnormality_of_blood_and_blood-forming_tissues	CALR	HP:0001871	ORPHA:824	OP15
Abnormality_of_blood_and_blood-forming_tissues	CAMK2B	HP:0001871	OMIM:617799	OP15
Abnormality_of_blood_and_blood-forming_tissues	CAP2	HP:0001871	ORPHA:154	OP15
Abnormality_of_blood_and_blood-forming_tissues	CAPN3	HP:0001871	OMIM:253600	OP15
Abnormality_of_blood_and_blood-forming_tissues	CAPN5	HP:0001871	OMIM:193235	OP15
Abnormality_of_blood_and_blood-forming_tissues	CARD10	HP:0001871	OMIM:619632	OP15
Abnormality_of_blood_and_blood-forming_tissues	CARD11	HP:0001871	OMIM:615206	OP15
Abnormality_of_blood_and_blood-forming_tissues	CARD9	HP:0001871	OMIM:212050	OP15
Abnormality_of_blood_and_blood-forming_tissues	CARMIL2	HP:0001871	OMIM:618131	OP15
Abnormality_of_blood_and_blood-forming_tissues	CARS1	HP:0001871	ORPHA:33364	OP15
Abnormality_of_blood_and_blood-forming_tissues	CASK	HP:0001871	OMIM:300908	OP15
Abnormality_of_blood_and_blood-forming_tissues	CASP10	HP:0001871	ORPHA:3261	OP15
Abnormality_of_blood_and_blood-forming_tissues	CASP8	HP:0001871	OMIM:607271	OP15
Abnormality_of_blood_and_blood-forming_tissues	CASR	HP:0001871	ORPHA:676	OP15
Abnormality_of_blood_and_blood-forming_tissues	CAT	HP:0001871	ORPHA:926	OP15
Abnormality_of_blood_and_blood-forming_tissues	CAVIN1	HP:0001871	OMIM:613327	OP15
Abnormality_of_blood_and_blood-forming_tissues	CBL	HP:0001871	ORPHA:98850	OP15
Abnormality_of_blood_and_blood-forming_tissues	CBLIF	HP:0001871	OMIM:261000	OP15
Abnormality_of_blood_and_blood-forming_tissues	CBS	HP:0001871	ORPHA:394	OP15
Abnormality_of_blood_and_blood-forming_tissues	CCBE1	HP:0001871	ORPHA:2136	OP15
Abnormality_of_blood_and_blood-forming_tissues	CCM2	HP:0001871	OMIM:603284	OP15
Abnormality_of_blood_and_blood-forming_tissues	CCM2	HP:0001871	ORPHA:221061	OP15
Abnormality_of_blood_and_blood-forming_tissues	CCND1	HP:0001871	ORPHA:52416	OP15
Abnormality_of_blood_and_blood-forming_tissues	CCR1	HP:0001871	ORPHA:117	OP15
Abnormality_of_blood_and_blood-forming_tissues	CD109	HP:0001871	ORPHA:853	OP15
Abnormality_of_blood_and_blood-forming_tissues	CD19	HP:0001871	ORPHA:1572	OP15
Abnormality_of_blood_and_blood-forming_tissues	CD247	HP:0001871	ORPHA:169160	OP15
Abnormality_of_blood_and_blood-forming_tissues	CD27	HP:0001871	OMIM:615122	OP15
Abnormality_of_blood_and_blood-forming_tissues	CD28	HP:0001871	ORPHA:3162	OP15
Abnormality_of_blood_and_blood-forming_tissues	CD36	HP:0001871	OMIM:608404	OP15
Abnormality_of_blood_and_blood-forming_tissues	CD3D	HP:0001871	ORPHA:169160	OP15
Abnormality_of_blood_and_blood-forming_tissues	CD3E	HP:0001871	ORPHA:169160	OP15
Abnormality_of_blood_and_blood-forming_tissues	CD3G	HP:0001871	OMIM:615607	OP15
Abnormality_of_blood_and_blood-forming_tissues	CD4	HP:0001871	OMIM:619238	OP15
Abnormality_of_blood_and_blood-forming_tissues	CD40	HP:0001871	OMIM:606843	OP15
Abnormality_of_blood_and_blood-forming_tissues	CD40LG	HP:0001871	OMIM:308230	OP15
Abnormality_of_blood_and_blood-forming_tissues	CD46	HP:0001871	ORPHA:244242	OP15
Abnormality_of_blood_and_blood-forming_tissues	CD55	HP:0001871	OMIM:226300	OP15
Abnormality_of_blood_and_blood-forming_tissues	CD59	HP:0001871	OMIM:612300	OP15
Abnormality_of_blood_and_blood-forming_tissues	CD70	HP:0001871	OMIM:618261	OP15
Abnormality_of_blood_and_blood-forming_tissues	CD79A	HP:0001871	OMIM:613501	OP15
Abnormality_of_blood_and_blood-forming_tissues	CD79A	HP:0001871	ORPHA:33110	OP15
Abnormality_of_blood_and_blood-forming_tissues	CD79B	HP:0001871	OMIM:612692	OP15
Abnormality_of_blood_and_blood-forming_tissues	CD79B	HP:0001871	ORPHA:33110	OP15
Abnormality_of_blood_and_blood-forming_tissues	CD81	HP:0001871	OMIM:613496	OP15
Abnormality_of_blood_and_blood-forming_tissues	CD81	HP:0001871	ORPHA:1572	OP15
Abnormality_of_blood_and_blood-forming_tissues	CD8A	HP:0001871	OMIM:608957	OP15
Abnormality_of_blood_and_blood-forming_tissues	CDAN1	HP:0001871	OMIM:224120	OP15
Abnormality_of_blood_and_blood-forming_tissues	CDC40	HP:0001871	OMIM:619302	OP15
Abnormality_of_blood_and_blood-forming_tissues	CDC42	HP:0001871	OMIM:616737	OP15
Abnormality_of_blood_and_blood-forming_tissues	CDC42	HP:0001871	ORPHA:487796	OP15
Abnormality_of_blood_and_blood-forming_tissues	CDC42BPB	HP:0001871	OMIM:619841	OP15
Abnormality_of_blood_and_blood-forming_tissues	CDCA7	HP:0001871	OMIM:616910	OP15
Abnormality_of_blood_and_blood-forming_tissues	CDH23	HP:0001871	ORPHA:96253	OP15
Abnormality_of_blood_and_blood-forming_tissues	CDIN1	HP:0001871	OMIM:615631	OP15
Abnormality_of_blood_and_blood-forming_tissues	CDKN1A	HP:0001871	ORPHA:652	OP15
Abnormality_of_blood_and_blood-forming_tissues	CDKN1B	HP:0001871	ORPHA:652	OP15
Abnormality_of_blood_and_blood-forming_tissues	CDKN2A	HP:0001871	ORPHA:524	OP15
Abnormality_of_blood_and_blood-forming_tissues	CDKN2B	HP:0001871	ORPHA:652	OP15
Abnormality_of_blood_and_blood-forming_tissues	CDKN2C	HP:0001871	ORPHA:652	OP15
Abnormality_of_blood_and_blood-forming_tissues	CDSN	HP:0001871	OMIM:270300	OP15
Abnormality_of_blood_and_blood-forming_tissues	CDSN	HP:0001871	ORPHA:90368	OP15
Abnormality_of_blood_and_blood-forming_tissues	CEBPA	HP:0001871	OMIM:601626	OP15
Abnormality_of_blood_and_blood-forming_tissues	CEBPE	HP:0001871	OMIM:245480	OP15
Abnormality_of_blood_and_blood-forming_tissues	CEL	HP:0001871	OMIM:609812	OP15
Abnormality_of_blood_and_blood-forming_tissues	CEL	HP:0001871	ORPHA:552	OP15
Abnormality_of_blood_and_blood-forming_tissues	CELA2A	HP:0001871	OMIM:618620	OP15
Abnormality_of_blood_and_blood-forming_tissues	CEP57	HP:0001871	ORPHA:1052	OP15
Abnormality_of_blood_and_blood-forming_tissues	CFB	HP:0001871	OMIM:612924	OP15
Abnormality_of_blood_and_blood-forming_tissues	CFH	HP:0001871	ORPHA:244242	OP15
Abnormality_of_blood_and_blood-forming_tissues	CFHR1	HP:0001871	OMIM:603075	OP15
Abnormality_of_blood_and_blood-forming_tissues	CFHR3	HP:0001871	OMIM:603075	OP15
Abnormality_of_blood_and_blood-forming_tissues	CFI	HP:0001871	ORPHA:244242	OP15
Abnormality_of_blood_and_blood-forming_tissues	CFTR	HP:0001871	OMIM:167800	OP15
Abnormality_of_blood_and_blood-forming_tissues	CHD7	HP:0001871	ORPHA:39041	OP15
Abnormality_of_blood_and_blood-forming_tissues	CHEK2	HP:0001871	ORPHA:524	OP15
Abnormality_of_blood_and_blood-forming_tissues	CHIC2	HP:0001871	OMIM:601626	OP15
Abnormality_of_blood_and_blood-forming_tissues	CHST14	HP:0001871	ORPHA:2953	OP15
Abnormality_of_blood_and_blood-forming_tissues	CIITA	HP:0001871	OMIM:209920	OP15
Abnormality_of_blood_and_blood-forming_tissues	CISD2	HP:0001871	ORPHA:3463	OP15
Abnormality_of_blood_and_blood-forming_tissues	CITED2	HP:0001871	ORPHA:99105	OP15
Abnormality_of_blood_and_blood-forming_tissues	CLCN2	HP:0001871	ORPHA:404	OP15
Abnormality_of_blood_and_blood-forming_tissues	CLCN7	HP:0001871	OMIM:166600	OP15
Abnormality_of_blood_and_blood-forming_tissues	CLCNKB	HP:0001871	ORPHA:358	OP15
Abnormality_of_blood_and_blood-forming_tissues	CLN3	HP:0001871	OMIM:204200	OP15
Abnormality_of_blood_and_blood-forming_tissues	CLN3	HP:0001871	ORPHA:228346	OP15
Abnormality_of_blood_and_blood-forming_tissues	CLN5	HP:0001871	OMIM:256731	OP15
Abnormality_of_blood_and_blood-forming_tissues	CLPB	HP:0001871	ORPHA:445038	OP15
Abnormality_of_blood_and_blood-forming_tissues	CLPX	HP:0001871	OMIM:618015	OP15
Abnormality_of_blood_and_blood-forming_tissues	CNBP	HP:0001871	OMIM:602668	OP15
Abnormality_of_blood_and_blood-forming_tissues	COA8	HP:0001871	ORPHA:436271	OP15
Abnormality_of_blood_and_blood-forming_tissues	COG1	HP:0001871	OMIM:611209	OP15
Abnormality_of_blood_and_blood-forming_tissues	COG2	HP:0001871	ORPHA:435934	OP15
Abnormality_of_blood_and_blood-forming_tissues	COG4	HP:0001871	ORPHA:263501	OP15
Abnormality_of_blood_and_blood-forming_tissues	COG6	HP:0001871	OMIM:614576	OP15
Abnormality_of_blood_and_blood-forming_tissues	COG8	HP:0001871	ORPHA:95428	OP15
Abnormality_of_blood_and_blood-forming_tissues	COL14A1	HP:0001871	ORPHA:79501	OP15
Abnormality_of_blood_and_blood-forming_tissues	COL17A1	HP:0001871	ORPHA:79402	OP15
Abnormality_of_blood_and_blood-forming_tissues	COL17A1	HP:0001871	ORPHA:79406	OP15
Abnormality_of_blood_and_blood-forming_tissues	COL1A1	HP:0001871	ORPHA:1310	OP15
Abnormality_of_blood_and_blood-forming_tissues	COL1A2	HP:0001871	OMIM:225320	OP15
Abnormality_of_blood_and_blood-forming_tissues	COL1A2	HP:0001871	OMIM:617821	OP15
Abnormality_of_blood_and_blood-forming_tissues	COL1A2	HP:0001871	OMIM:619120	OP15
Abnormality_of_blood_and_blood-forming_tissues	COL1A2	HP:0001871	ORPHA:230851	OP15
Abnormality_of_blood_and_blood-forming_tissues	COL2A1	HP:0001871	ORPHA:93315	OP15
Abnormality_of_blood_and_blood-forming_tissues	COL3A1	HP:0001871	OMIM:130050	OP15
Abnormality_of_blood_and_blood-forming_tissues	COL4A1	HP:0001871	OMIM:175780	OP15
Abnormality_of_blood_and_blood-forming_tissues	COL4A2	HP:0001871	OMIM:614483	OP15
Abnormality_of_blood_and_blood-forming_tissues	COL4A5	HP:0001871	OMIM:301050	OP15
Abnormality_of_blood_and_blood-forming_tissues	COL5A1	HP:0001871	ORPHA:287	OP15
Abnormality_of_blood_and_blood-forming_tissues	COL5A2	HP:0001871	ORPHA:287	OP15
Abnormality_of_blood_and_blood-forming_tissues	COL7A1	HP:0001871	OMIM:226600	OP15
Abnormality_of_blood_and_blood-forming_tissues	COL7A1	HP:0001871	ORPHA:79408	OP15
Abnormality_of_blood_and_blood-forming_tissues	COL7A1	HP:0001871	ORPHA:79409	OP15
Abnormality_of_blood_and_blood-forming_tissues	COL7A1	HP:0001871	ORPHA:79410	OP15
Abnormality_of_blood_and_blood-forming_tissues	COL7A1	HP:0001871	ORPHA:79411	OP15
Abnormality_of_blood_and_blood-forming_tissues	COL7A1	HP:0001871	ORPHA:89842	OP15
Abnormality_of_blood_and_blood-forming_tissues	COMT	HP:0001871	ORPHA:567	OP15
Abnormality_of_blood_and_blood-forming_tissues	COPA	HP:0001871	OMIM:616414	OP15
Abnormality_of_blood_and_blood-forming_tissues	COQ2	HP:0001871	OMIM:607426	OP15
Abnormality_of_blood_and_blood-forming_tissues	CORIN	HP:0001871	ORPHA:275555	OP15
Abnormality_of_blood_and_blood-forming_tissues	CORO1A	HP:0001871	OMIM:615401	OP15
Abnormality_of_blood_and_blood-forming_tissues	COX10	HP:0001871	OMIM:619046	OP15
Abnormality_of_blood_and_blood-forming_tissues	COX16	HP:0001871	OMIM:619355	OP15
Abnormality_of_blood_and_blood-forming_tissues	COX4I2	HP:0001871	OMIM:612714	OP15
Abnormality_of_blood_and_blood-forming_tissues	CP	HP:0001871	ORPHA:48818	OP15
Abnormality_of_blood_and_blood-forming_tissues	CPA1	HP:0001871	ORPHA:676	OP15
Abnormality_of_blood_and_blood-forming_tissues	CPOX	HP:0001871	OMIM:618892	OP15
Abnormality_of_blood_and_blood-forming_tissues	CPT2	HP:0001871	OMIM:608836	OP15
Abnormality_of_blood_and_blood-forming_tissues	CR2	HP:0001871	ORPHA:1572	OP15
Abnormality_of_blood_and_blood-forming_tissues	CREB3L1	HP:0001871	OMIM:616229	OP15
Abnormality_of_blood_and_blood-forming_tissues	CREBBP	HP:0001871	OMIM:180849	OP15
Abnormality_of_blood_and_blood-forming_tissues	CRIPT	HP:0001871	OMIM:615789	OP15
Abnormality_of_blood_and_blood-forming_tissues	CRYAB	HP:0001871	ORPHA:154	OP15
Abnormality_of_blood_and_blood-forming_tissues	CSF3R	HP:0001871	OMIM:162830	OP15
Abnormality_of_blood_and_blood-forming_tissues	CSNK2A1	HP:0001871	OMIM:617062	OP15
Abnormality_of_blood_and_blood-forming_tissues	CSRP3	HP:0001871	ORPHA:154	OP15
Abnormality_of_blood_and_blood-forming_tissues	CST3	HP:0001871	OMIM:105150	OP15
Abnormality_of_blood_and_blood-forming_tissues	CST3	HP:0001871	ORPHA:100008	OP15
Abnormality_of_blood_and_blood-forming_tissues	CTC1	HP:0001871	OMIM:612199	OP15
Abnormality_of_blood_and_blood-forming_tissues	CTC1	HP:0001871	ORPHA:1775	OP15
Abnormality_of_blood_and_blood-forming_tissues	CTCF	HP:0001871	ORPHA:363611	OP15
Abnormality_of_blood_and_blood-forming_tissues	CTLA4	HP:0001871	ORPHA:900	OP15
Abnormality_of_blood_and_blood-forming_tissues	CTNNB1	HP:0001871	ORPHA:873	OP15
Abnormality_of_blood_and_blood-forming_tissues	CTNNBL1	HP:0001871	OMIM:619846	OP15
Abnormality_of_blood_and_blood-forming_tissues	CTPS1	HP:0001871	OMIM:615897	OP15
Abnormality_of_blood_and_blood-forming_tissues	CTRC	HP:0001871	OMIM:167800	OP15
Abnormality_of_blood_and_blood-forming_tissues	CUBN	HP:0001871	ORPHA:35858	OP15
Abnormality_of_blood_and_blood-forming_tissues	CXCR2	HP:0001871	OMIM:619407	OP15
Abnormality_of_blood_and_blood-forming_tissues	CXCR4	HP:0001871	OMIM:193670	OP15
Abnormality_of_blood_and_blood-forming_tissues	CYB561	HP:0001871	OMIM:618182	OP15
Abnormality_of_blood_and_blood-forming_tissues	CYB5A	HP:0001871	OMIM:250790	OP15
Abnormality_of_blood_and_blood-forming_tissues	CYB5A	HP:0001871	ORPHA:621	OP15
Abnormality_of_blood_and_blood-forming_tissues	CYB5R3	HP:0001871	OMIM:250800	OP15
Abnormality_of_blood_and_blood-forming_tissues	CYBA	HP:0001871	OMIM:233690	OP15
Abnormality_of_blood_and_blood-forming_tissues	CYBB	HP:0001871	OMIM:306400	OP15
Abnormality_of_blood_and_blood-forming_tissues	CYBC1	HP:0001871	OMIM:618935	OP15
Abnormality_of_blood_and_blood-forming_tissues	CYCS	HP:0001871	OMIM:612004	OP15
Abnormality_of_blood_and_blood-forming_tissues	CYP11B1	HP:0001871	ORPHA:403	OP15
Abnormality_of_blood_and_blood-forming_tissues	CYP11B2	HP:0001871	ORPHA:403	OP15
Abnormality_of_blood_and_blood-forming_tissues	CYP26C1	HP:0001871	ORPHA:398189	OP15
Abnormality_of_blood_and_blood-forming_tissues	CYP2A6	HP:0001871	OMIM:122700	OP15
Abnormality_of_blood_and_blood-forming_tissues	CYP2C9	HP:0001871	OMIM:122700	OP15
Abnormality_of_blood_and_blood-forming_tissues	CYP4F22	HP:0001871	OMIM:604777	OP15
Abnormality_of_blood_and_blood-forming_tissues	CYP7B1	HP:0001871	OMIM:613812	OP15
Abnormality_of_blood_and_blood-forming_tissues	CYSLTR2	HP:0001871	ORPHA:39044	OP15
Abnormality_of_blood_and_blood-forming_tissues	DAXX	HP:0001871	ORPHA:100075	OP15
Abnormality_of_blood_and_blood-forming_tissues	DBH	HP:0001871	ORPHA:230	OP15
Abnormality_of_blood_and_blood-forming_tissues	DCDC2	HP:0001871	ORPHA:84081	OP15
Abnormality_of_blood_and_blood-forming_tissues	DCLRE1B	HP:0001871	OMIM:620133	OP15
Abnormality_of_blood_and_blood-forming_tissues	DCLRE1C	HP:0001871	OMIM:603554	OP15
Abnormality_of_blood_and_blood-forming_tissues	DDOST	HP:0001871	ORPHA:300536	OP15
Abnormality_of_blood_and_blood-forming_tissues	DDX41	HP:0001871	OMIM:616871	OP15
Abnormality_of_blood_and_blood-forming_tissues	DEF6	HP:0001871	OMIM:619573	OP15
Abnormality_of_blood_and_blood-forming_tissues	DES	HP:0001871	ORPHA:154	OP15
Abnormality_of_blood_and_blood-forming_tissues	DGCR2	HP:0001871	OMIM:192430	OP15
Abnormality_of_blood_and_blood-forming_tissues	DGCR6	HP:0001871	OMIM:192430	OP15
Abnormality_of_blood_and_blood-forming_tissues	DGCR8	HP:0001871	OMIM:192430	OP15
Abnormality_of_blood_and_blood-forming_tissues	DGKE	HP:0001871	OMIM:615008	OP15
Abnormality_of_blood_and_blood-forming_tissues	DGUOK	HP:0001871	OMIM:251880	OP15
Abnormality_of_blood_and_blood-forming_tissues	DHFR	HP:0001871	OMIM:613839	OP15
Abnormality_of_blood_and_blood-forming_tissues	DHPS	HP:0001871	OMIM:618480	OP15
Abnormality_of_blood_and_blood-forming_tissues	DIAPH1	HP:0001871	OMIM:124900	OP15
Abnormality_of_blood_and_blood-forming_tissues	DKC1	HP:0001871	OMIM:305000	OP15
Abnormality_of_blood_and_blood-forming_tissues	DKC1	HP:0001871	ORPHA:1775	OP15
Abnormality_of_blood_and_blood-forming_tissues	DKC1	HP:0001871	ORPHA:3322	OP15
Abnormality_of_blood_and_blood-forming_tissues	DLD	HP:0001871	ORPHA:2394	OP15
Abnormality_of_blood_and_blood-forming_tissues	DLL4	HP:0001871	ORPHA:974	OP15
Abnormality_of_blood_and_blood-forming_tissues	DLST	HP:0001871	ORPHA:29072	OP15
Abnormality_of_blood_and_blood-forming_tissues	DMD	HP:0001871	ORPHA:154	OP15
Abnormality_of_blood_and_blood-forming_tissues	DMXL2	HP:0001871	OMIM:616113	OP15
Abnormality_of_blood_and_blood-forming_tissues	DNAJC19	HP:0001871	OMIM:610198	OP15
Abnormality_of_blood_and_blood-forming_tissues	DNAJC19	HP:0001871	ORPHA:66634	OP15
Abnormality_of_blood_and_blood-forming_tissues	DNAJC21	HP:0001871	OMIM:617052	OP15
Abnormality_of_blood_and_blood-forming_tissues	DNAJC21	HP:0001871	ORPHA:811	OP15
Abnormality_of_blood_and_blood-forming_tissues	DNAJC3	HP:0001871	OMIM:616192	OP15
Abnormality_of_blood_and_blood-forming_tissues	DNASE1	HP:0001871	OMIM:152700	OP15
Abnormality_of_blood_and_blood-forming_tissues	DNASE1	HP:0001871	ORPHA:536	OP15
Abnormality_of_blood_and_blood-forming_tissues	DNASE1L3	HP:0001871	ORPHA:36412	OP15
Abnormality_of_blood_and_blood-forming_tissues	DNASE2	HP:0001871	OMIM:619858	OP15
Abnormality_of_blood_and_blood-forming_tissues	DNM1L	HP:0001871	ORPHA:98673	OP15
Abnormality_of_blood_and_blood-forming_tissues	DNM2	HP:0001871	OMIM:615368	OP15
Abnormality_of_blood_and_blood-forming_tissues	DNMT3A	HP:0001871	ORPHA:276621	OP15
Abnormality_of_blood_and_blood-forming_tissues	DNMT3B	HP:0001871	ORPHA:2268	OP15
Abnormality_of_blood_and_blood-forming_tissues	DOCK2	HP:0001871	OMIM:616433	OP15
Abnormality_of_blood_and_blood-forming_tissues	DOCK6	HP:0001871	ORPHA:974	OP15
Abnormality_of_blood_and_blood-forming_tissues	DOCK8	HP:0001871	OMIM:243700	OP15
Abnormality_of_blood_and_blood-forming_tissues	DOLK	HP:0001871	ORPHA:154	OP15
Abnormality_of_blood_and_blood-forming_tissues	DPAGT1	HP:0001871	ORPHA:86309	OP15
Abnormality_of_blood_and_blood-forming_tissues	DPM1	HP:0001871	OMIM:608799	OP15
Abnormality_of_blood_and_blood-forming_tissues	DPM1	HP:0001871	ORPHA:79322	OP15
Abnormality_of_blood_and_blood-forming_tissues	DPM2	HP:0001871	ORPHA:329178	OP15
Abnormality_of_blood_and_blood-forming_tissues	DPP9	HP:0001871	OMIM:620331	OP15
Abnormality_of_blood_and_blood-forming_tissues	DSE	HP:0001871	ORPHA:2953	OP15
Abnormality_of_blood_and_blood-forming_tissues	DSG1	HP:0001871	OMIM:615508	OP15
Abnormality_of_blood_and_blood-forming_tissues	DSG2	HP:0001871	ORPHA:154	OP15
Abnormality_of_blood_and_blood-forming_tissues	DSP	HP:0001871	ORPHA:154	OP15
Abnormality_of_blood_and_blood-forming_tissues	DST	HP:0001871	OMIM:614653	OP15
Abnormality_of_blood_and_blood-forming_tissues	DTNBP1	HP:0001871	OMIM:614076	OP15
Abnormality_of_blood_and_blood-forming_tissues	DUT	HP:0001871	OMIM:620044	OP15
Abnormality_of_blood_and_blood-forming_tissues	DYNC2LI1	HP:0001871	ORPHA:289	OP15
Abnormality_of_blood_and_blood-forming_tissues	DZIP1L	HP:0001871	ORPHA:731	OP15
Abnormality_of_blood_and_blood-forming_tissues	EDNRB	HP:0001871	OMIM:600501	OP15
Abnormality_of_blood_and_blood-forming_tissues	EFEMP1	HP:0001871	ORPHA:75376	OP15
Abnormality_of_blood_and_blood-forming_tissues	EFL1	HP:0001871	ORPHA:811	OP15
Abnormality_of_blood_and_blood-forming_tissues	EGFR	HP:0001871	OMIM:616069	OP15
Abnormality_of_blood_and_blood-forming_tissues	EGLN1	HP:0001871	OMIM:609820	OP15
Abnormality_of_blood_and_blood-forming_tissues	EIF2AK3	HP:0001871	ORPHA:1667	OP15
Abnormality_of_blood_and_blood-forming_tissues	EIF2AK4	HP:0001871	ORPHA:199241	OP15
Abnormality_of_blood_and_blood-forming_tissues	ELANE	HP:0001871	OMIM:202700	OP15
Abnormality_of_blood_and_blood-forming_tissues	ELF4	HP:0001871	OMIM:301074	OP15
Abnormality_of_blood_and_blood-forming_tissues	ELMO2	HP:0001871	OMIM:606893	OP15
Abnormality_of_blood_and_blood-forming_tissues	ELN	HP:0001871	ORPHA:91387	OP15
Abnormality_of_blood_and_blood-forming_tissues	EMILIN1	HP:0001871	OMIM:620080	OP15
Abnormality_of_blood_and_blood-forming_tissues	ENG	HP:0001871	OMIM:187300	OP15
Abnormality_of_blood_and_blood-forming_tissues	ENG	HP:0001871	ORPHA:774	OP15
Abnormality_of_blood_and_blood-forming_tissues	ENPP1	HP:0001871	ORPHA:758	OP15
Abnormality_of_blood_and_blood-forming_tissues	EOGT	HP:0001871	ORPHA:974	OP15
Abnormality_of_blood_and_blood-forming_tissues	EP300	HP:0001871	OMIM:180849	OP15
Abnormality_of_blood_and_blood-forming_tissues	EPAS1	HP:0001871	OMIM:611783	OP15
Abnormality_of_blood_and_blood-forming_tissues	EPB41	HP:0001871	ORPHA:288	OP15
Abnormality_of_blood_and_blood-forming_tissues	EPB42	HP:0001871	OMIM:612690	OP15
Abnormality_of_blood_and_blood-forming_tissues	EPB42	HP:0001871	ORPHA:822	OP15
Abnormality_of_blood_and_blood-forming_tissues	EPCAM	HP:0001871	ORPHA:144	OP15
Abnormality_of_blood_and_blood-forming_tissues	EPG5	HP:0001871	OMIM:242840	OP15
Abnormality_of_blood_and_blood-forming_tissues	EPG5	HP:0001871	ORPHA:1493	OP15
Abnormality_of_blood_and_blood-forming_tissues	EPHB2	HP:0001871	OMIM:618462	OP15
Abnormality_of_blood_and_blood-forming_tissues	EPHB4	HP:0001871	OMIM:617300	OP15
Abnormality_of_blood_and_blood-forming_tissues	EPO	HP:0001871	OMIM:617907	OP15
Abnormality_of_blood_and_blood-forming_tissues	EPOR	HP:0001871	ORPHA:90042	OP15
Abnormality_of_blood_and_blood-forming_tissues	EPX	HP:0001871	OMIM:261500	OP15
Abnormality_of_blood_and_blood-forming_tissues	ERAP1	HP:0001871	ORPHA:117	OP15
Abnormality_of_blood_and_blood-forming_tissues	ERBB3	HP:0001871	OMIM:133180	OP15
Abnormality_of_blood_and_blood-forming_tissues	ERCC2	HP:0001871	ORPHA:33364	OP15
Abnormality_of_blood_and_blood-forming_tissues	ERCC3	HP:0001871	ORPHA:33364	OP15
Abnormality_of_blood_and_blood-forming_tissues	ERCC4	HP:0001871	OMIM:615272	OP15
Abnormality_of_blood_and_blood-forming_tissues	ERCC6	HP:0001871	ORPHA:90324	OP15
Abnormality_of_blood_and_blood-forming_tissues	ERCC6L2	HP:0001871	OMIM:615715	OP15
Abnormality_of_blood_and_blood-forming_tissues	ERCC8	HP:0001871	ORPHA:90324	OP15
Abnormality_of_blood_and_blood-forming_tissues	ERMARD	HP:0001871	ORPHA:98892	OP15
Abnormality_of_blood_and_blood-forming_tissues	ESCO2	HP:0001871	ORPHA:3103	OP15
Abnormality_of_blood_and_blood-forming_tissues	ESS2	HP:0001871	OMIM:192430	OP15
Abnormality_of_blood_and_blood-forming_tissues	ETHE1	HP:0001871	OMIM:602473	OP15
Abnormality_of_blood_and_blood-forming_tissues	ETHE1	HP:0001871	ORPHA:51188	OP15
Abnormality_of_blood_and_blood-forming_tissues	ETS1	HP:0001871	ORPHA:536	OP15
Abnormality_of_blood_and_blood-forming_tissues	ETV6	HP:0001871	OMIM:616216	OP15
Abnormality_of_blood_and_blood-forming_tissues	EVC	HP:0001871	ORPHA:289	OP15
Abnormality_of_blood_and_blood-forming_tissues	EVC2	HP:0001871	ORPHA:289	OP15
Abnormality_of_blood_and_blood-forming_tissues	EWSR1	HP:0001871	ORPHA:83469	OP15
Abnormality_of_blood_and_blood-forming_tissues	EXT2	HP:0001871	ORPHA:52022	OP15
Abnormality_of_blood_and_blood-forming_tissues	EXTL3	HP:0001871	ORPHA:508533	OP15
Abnormality_of_blood_and_blood-forming_tissues	F10	HP:0001871	ORPHA:328	OP15
Abnormality_of_blood_and_blood-forming_tissues	F11	HP:0001871	ORPHA:329	OP15
Abnormality_of_blood_and_blood-forming_tissues	F12	HP:0001871	OMIM:234000	OP15
Abnormality_of_blood_and_blood-forming_tissues	F13A1	HP:0001871	OMIM:188050	OP15
Abnormality_of_blood_and_blood-forming_tissues	F13B	HP:0001871	OMIM:613235	OP15
Abnormality_of_blood_and_blood-forming_tissues	F13B	HP:0001871	ORPHA:331	OP15
Abnormality_of_blood_and_blood-forming_tissues	F2	HP:0001871	ORPHA:325	OP15
Abnormality_of_blood_and_blood-forming_tissues	F5	HP:0001871	OMIM:227400	OP15
Abnormality_of_blood_and_blood-forming_tissues	F7	HP:0001871	ORPHA:327	OP15
Abnormality_of_blood_and_blood-forming_tissues	F8	HP:0001871	OMIM:301071	OP15
Abnormality_of_blood_and_blood-forming_tissues	F9	HP:0001871	OMIM:306900	OP15
Abnormality_of_blood_and_blood-forming_tissues	FADD	HP:0001871	OMIM:613759	OP15
Abnormality_of_blood_and_blood-forming_tissues	FAH	HP:0001871	OMIM:276700	OP15
Abnormality_of_blood_and_blood-forming_tissues	FAM111A	HP:0001871	OMIM:127000	OP15
Abnormality_of_blood_and_blood-forming_tissues	FAM111A	HP:0001871	ORPHA:93325	OP15
Abnormality_of_blood_and_blood-forming_tissues	FAN1	HP:0001871	ORPHA:144	OP15
Abnormality_of_blood_and_blood-forming_tissues	FANCA	HP:0001871	ORPHA:84	OP15
Abnormality_of_blood_and_blood-forming_tissues	FANCB	HP:0001871	ORPHA:84	OP15
Abnormality_of_blood_and_blood-forming_tissues	FANCC	HP:0001871	OMIM:227645	OP15
Abnormality_of_blood_and_blood-forming_tissues	FANCD2	HP:0001871	OMIM:227646	OP15
Abnormality_of_blood_and_blood-forming_tissues	FANCE	HP:0001871	ORPHA:84	OP15
Abnormality_of_blood_and_blood-forming_tissues	FANCF	HP:0001871	OMIM:603467	OP15
Abnormality_of_blood_and_blood-forming_tissues	FANCG	HP:0001871	ORPHA:84	OP15
Abnormality_of_blood_and_blood-forming_tissues	FANCI	HP:0001871	OMIM:609053	OP15
Abnormality_of_blood_and_blood-forming_tissues	FANCL	HP:0001871	OMIM:614083	OP15
Abnormality_of_blood_and_blood-forming_tissues	FANCM	HP:0001871	ORPHA:84	OP15
Abnormality_of_blood_and_blood-forming_tissues	FARS2	HP:0001871	OMIM:614946	OP15
Abnormality_of_blood_and_blood-forming_tissues	FARSA	HP:0001871	OMIM:619013	OP15
Abnormality_of_blood_and_blood-forming_tissues	FARSB	HP:0001871	OMIM:613658	OP15
Abnormality_of_blood_and_blood-forming_tissues	FAS	HP:0001871	ORPHA:3261	OP15
Abnormality_of_blood_and_blood-forming_tissues	FASLG	HP:0001871	ORPHA:3261	OP15
Abnormality_of_blood_and_blood-forming_tissues	FAT4	HP:0001871	ORPHA:2136	OP15
Abnormality_of_blood_and_blood-forming_tissues	FBN1	HP:0001871	ORPHA:91387	OP15
Abnormality_of_blood_and_blood-forming_tissues	FBXL4	HP:0001871	OMIM:615471	OP15
Abnormality_of_blood_and_blood-forming_tissues	FBXW7	HP:0001871	OMIM:620012	OP15
Abnormality_of_blood_and_blood-forming_tissues	FCGR2A	HP:0001871	OMIM:152700	OP15
Abnormality_of_blood_and_blood-forming_tissues	FCGR2B	HP:0001871	OMIM:152700	OP15
Abnormality_of_blood_and_blood-forming_tissues	FCGR2B	HP:0001871	ORPHA:536	OP15
Abnormality_of_blood_and_blood-forming_tissues	FCGR2C	HP:0001871	ORPHA:3002	OP15
Abnormality_of_blood_and_blood-forming_tissues	FCGR3A	HP:0001871	OMIM:615707	OP15
Abnormality_of_blood_and_blood-forming_tissues	FCGR3B	HP:0001871	ORPHA:464370	OP15
Abnormality_of_blood_and_blood-forming_tissues	FCHO1	HP:0001871	OMIM:619164	OP15
Abnormality_of_blood_and_blood-forming_tissues	FDX2	HP:0001871	OMIM:251900	OP15
Abnormality_of_blood_and_blood-forming_tissues	FECH	HP:0001871	ORPHA:79278	OP15
Abnormality_of_blood_and_blood-forming_tissues	FERMT1	HP:0001871	ORPHA:2908	OP15
Abnormality_of_blood_and_blood-forming_tissues	FERMT3	HP:0001871	OMIM:612840	OP15
Abnormality_of_blood_and_blood-forming_tissues	FGA	HP:0001871	ORPHA:101041	OP15
Abnormality_of_blood_and_blood-forming_tissues	FGA	HP:0001871	ORPHA:98881	OP15
Abnormality_of_blood_and_blood-forming_tissues	FGB	HP:0001871	ORPHA:101041	OP15
Abnormality_of_blood_and_blood-forming_tissues	FGB	HP:0001871	ORPHA:98881	OP15
Abnormality_of_blood_and_blood-forming_tissues	FGF23	HP:0001871	ORPHA:89937	OP15
Abnormality_of_blood_and_blood-forming_tissues	FGFR2	HP:0001871	ORPHA:313855	OP15
Abnormality_of_blood_and_blood-forming_tissues	FGG	HP:0001871	ORPHA:101041	OP15
Abnormality_of_blood_and_blood-forming_tissues	FGG	HP:0001871	ORPHA:98881	OP15
Abnormality_of_blood_and_blood-forming_tissues	FH	HP:0001871	OMIM:606812	OP15
Abnormality_of_blood_and_blood-forming_tissues	FHL2	HP:0001871	ORPHA:154	OP15
Abnormality_of_blood_and_blood-forming_tissues	FIBP	HP:0001871	OMIM:617107	OP15
Abnormality_of_blood_and_blood-forming_tissues	FIBP	HP:0001871	ORPHA:500095	OP15
Abnormality_of_blood_and_blood-forming_tissues	FIG4	HP:0001871	OMIM:216340	OP15
Abnormality_of_blood_and_blood-forming_tissues	FIP1L1	HP:0001871	ORPHA:520	OP15
Abnormality_of_blood_and_blood-forming_tissues	FKBP10	HP:0001871	OMIM:610968	OP15
Abnormality_of_blood_and_blood-forming_tissues	FKBP14	HP:0001871	OMIM:614557	OP15
Abnormality_of_blood_and_blood-forming_tissues	FKBP14	HP:0001871	ORPHA:300179	OP15
Abnormality_of_blood_and_blood-forming_tissues	FKTN	HP:0001871	ORPHA:154	OP15
Abnormality_of_blood_and_blood-forming_tissues	FLI1	HP:0001871	ORPHA:2308	OP15
Abnormality_of_blood_and_blood-forming_tissues	FLNA	HP:0001871	OMIM:300049	OP15
Abnormality_of_blood_and_blood-forming_tissues	FLNC	HP:0001871	ORPHA:75249	OP15
Abnormality_of_blood_and_blood-forming_tissues	FLT1	HP:0001871	ORPHA:275555	OP15
Abnormality_of_blood_and_blood-forming_tissues	FLT3	HP:0001871	OMIM:601626	OP15
Abnormality_of_blood_and_blood-forming_tissues	FMO3	HP:0001871	OMIM:602079	OP15
Abnormality_of_blood_and_blood-forming_tissues	FN1	HP:0001871	ORPHA:84090	OP15
Abnormality_of_blood_and_blood-forming_tissues	FNIP1	HP:0001871	OMIM:619705	OP15
Abnormality_of_blood_and_blood-forming_tissues	FOCAD	HP:0001871	OMIM:619991	OP15
Abnormality_of_blood_and_blood-forming_tissues	FOXE3	HP:0001871	ORPHA:91387	OP15
Abnormality_of_blood_and_blood-forming_tissues	FOXN1	HP:0001871	OMIM:618806	OP15
Abnormality_of_blood_and_blood-forming_tissues	FOXP1	HP:0001871	ORPHA:52417	OP15
Abnormality_of_blood_and_blood-forming_tissues	FOXP2	HP:0001871	ORPHA:251061	OP15
Abnormality_of_blood_and_blood-forming_tissues	FOXP3	HP:0001871	ORPHA:37042	OP15
Abnormality_of_blood_and_blood-forming_tissues	FTCD	HP:0001871	ORPHA:51208	OP15
Abnormality_of_blood_and_blood-forming_tissues	FTH1	HP:0001871	OMIM:615517	OP15
Abnormality_of_blood_and_blood-forming_tissues	FUCA1	HP:0001871	OMIM:230000	OP15
Abnormality_of_blood_and_blood-forming_tissues	FUT8	HP:0001871	OMIM:618005	OP15
Abnormality_of_blood_and_blood-forming_tissues	FYB1	HP:0001871	OMIM:273900	OP15
Abnormality_of_blood_and_blood-forming_tissues	FZD4	HP:0001871	OMIM:133780	OP15
Abnormality_of_blood_and_blood-forming_tissues	FZD4	HP:0001871	ORPHA:891	OP15
Abnormality_of_blood_and_blood-forming_tissues	FZD4	HP:0001871	ORPHA:90050	OP15
Abnormality_of_blood_and_blood-forming_tissues	G6PC1	HP:0001871	OMIM:232200	OP15
Abnormality_of_blood_and_blood-forming_tissues	G6PC3	HP:0001871	OMIM:612541	OP15
Abnormality_of_blood_and_blood-forming_tissues	G6PD	HP:0001871	OMIM:300908	OP15
Abnormality_of_blood_and_blood-forming_tissues	GAA	HP:0001871	OMIM:232300	OP15
Abnormality_of_blood_and_blood-forming_tissues	GALC	HP:0001871	OMIM:245200	OP15
Abnormality_of_blood_and_blood-forming_tissues	GALNT2	HP:0001871	OMIM:618885	OP15
Abnormality_of_blood_and_blood-forming_tissues	GALT	HP:0001871	ORPHA:79239	OP15
Abnormality_of_blood_and_blood-forming_tissues	GATA1	HP:0001871	OMIM:301083	OP15
Abnormality_of_blood_and_blood-forming_tissues	GATA2	HP:0001871	ORPHA:3226	OP15
Abnormality_of_blood_and_blood-forming_tissues	GATA2	HP:0001871	ORPHA:98827	OP15
Abnormality_of_blood_and_blood-forming_tissues	GATA3	HP:0001871	ORPHA:2237	OP15
Abnormality_of_blood_and_blood-forming_tissues	GATA4	HP:0001871	ORPHA:334	OP15
Abnormality_of_blood_and_blood-forming_tissues	GATA5	HP:0001871	ORPHA:334	OP15
Abnormality_of_blood_and_blood-forming_tissues	GATA6	HP:0001871	ORPHA:334	OP15
Abnormality_of_blood_and_blood-forming_tissues	GATAD1	HP:0001871	ORPHA:154	OP15
Abnormality_of_blood_and_blood-forming_tissues	GATB	HP:0001871	OMIM:618838	OP15
Abnormality_of_blood_and_blood-forming_tissues	GATC	HP:0001871	OMIM:618839	OP15
Abnormality_of_blood_and_blood-forming_tissues	GBA1	HP:0001871	ORPHA:2072	OP15
Abnormality_of_blood_and_blood-forming_tissues	GCDH	HP:0001871	ORPHA:25	OP15
Abnormality_of_blood_and_blood-forming_tissues	GCK	HP:0001871	OMIM:606176	OP15
Abnormality_of_blood_and_blood-forming_tissues	GCK	HP:0001871	ORPHA:552	OP15
Abnormality_of_blood_and_blood-forming_tissues	GCLC	HP:0001871	ORPHA:33574	OP15
Abnormality_of_blood_and_blood-forming_tissues	GDF2	HP:0001871	ORPHA:774	OP15
Abnormality_of_blood_and_blood-forming_tissues	GFI1	HP:0001871	ORPHA:486	OP15
Abnormality_of_blood_and_blood-forming_tissues	GFI1B	HP:0001871	OMIM:187900	OP15
Abnormality_of_blood_and_blood-forming_tissues	GGCX	HP:0001871	OMIM:277450	OP15
Abnormality_of_blood_and_blood-forming_tissues	GIMAP5	HP:0001871	OMIM:619463	OP15
Abnormality_of_blood_and_blood-forming_tissues	GINS1	HP:0001871	OMIM:617827	OP15
Abnormality_of_blood_and_blood-forming_tissues	GJA5	HP:0001871	ORPHA:334	OP15
Abnormality_of_blood_and_blood-forming_tissues	GLA	HP:0001871	OMIM:301500	OP15
Abnormality_of_blood_and_blood-forming_tissues	GLA	HP:0001871	ORPHA:324	OP15
Abnormality_of_blood_and_blood-forming_tissues	GLB1	HP:0001871	OMIM:230600	OP15
Abnormality_of_blood_and_blood-forming_tissues	GLI1	HP:0001871	ORPHA:289	OP15
Abnormality_of_blood_and_blood-forming_tissues	GLRX5	HP:0001871	OMIM:616860	OP15
Abnormality_of_blood_and_blood-forming_tissues	GNA11	HP:0001871	ORPHA:39044	OP15
Abnormality_of_blood_and_blood-forming_tissues	GNA14	HP:0001871	ORPHA:1063	OP15
Abnormality_of_blood_and_blood-forming_tissues	GNAQ	HP:0001871	ORPHA:39044	OP15
Abnormality_of_blood_and_blood-forming_tissues	GNAS	HP:0001871	ORPHA:562	OP15
Abnormality_of_blood_and_blood-forming_tissues	GNB1	HP:0001871	OMIM:614286	OP15
Abnormality_of_blood_and_blood-forming_tissues	GNB2	HP:0001871	OMIM:619503	OP15
Abnormality_of_blood_and_blood-forming_tissues	GNE	HP:0001871	ORPHA:3166	OP15
Abnormality_of_blood_and_blood-forming_tissues	GP1BA	HP:0001871	OMIM:153670	OP15
Abnormality_of_blood_and_blood-forming_tissues	GP1BB	HP:0001871	OMIM:231200	OP15
Abnormality_of_blood_and_blood-forming_tissues	GP1BB	HP:0001871	ORPHA:274	OP15
Abnormality_of_blood_and_blood-forming_tissues	GP1BB	HP:0001871	ORPHA:567	OP15
Abnormality_of_blood_and_blood-forming_tissues	GP1BB	HP:0001871	ORPHA:853	OP15
Abnormality_of_blood_and_blood-forming_tissues	GP6	HP:0001871	OMIM:614201	OP15
Abnormality_of_blood_and_blood-forming_tissues	GP9	HP:0001871	OMIM:231200	OP15
Abnormality_of_blood_and_blood-forming_tissues	GP9	HP:0001871	ORPHA:274	OP15
Abnormality_of_blood_and_blood-forming_tissues	GPC3	HP:0001871	ORPHA:373	OP15
Abnormality_of_blood_and_blood-forming_tissues	GPC4	HP:0001871	ORPHA:373	OP15
Abnormality_of_blood_and_blood-forming_tissues	GPI	HP:0001871	OMIM:613470	OP15
Abnormality_of_blood_and_blood-forming_tissues	GPR35	HP:0001871	ORPHA:171	OP15
Abnormality_of_blood_and_blood-forming_tissues	GPX1	HP:0001871	OMIM:614164	OP15
Abnormality_of_blood_and_blood-forming_tissues	GREM1	HP:0001871	ORPHA:157794	OP15
Abnormality_of_blood_and_blood-forming_tissues	GSN	HP:0001871	ORPHA:85448	OP15
Abnormality_of_blood_and_blood-forming_tissues	GSR	HP:0001871	OMIM:618660	OP15
Abnormality_of_blood_and_blood-forming_tissues	GSS	HP:0001871	OMIM:231900	OP15
Abnormality_of_blood_and_blood-forming_tissues	GSS	HP:0001871	OMIM:266130	OP15
Abnormality_of_blood_and_blood-forming_tissues	GTF2E2	HP:0001871	ORPHA:33364	OP15
Abnormality_of_blood_and_blood-forming_tissues	GTF2H5	HP:0001871	ORPHA:33364	OP15
Abnormality_of_blood_and_blood-forming_tissues	GUCY1A1	HP:0001871	ORPHA:401945	OP15
Abnormality_of_blood_and_blood-forming_tissues	GYPC	HP:0001871	ORPHA:288	OP15
Abnormality_of_blood_and_blood-forming_tissues	H4C9	HP:0001871	OMIM:619951	OP15
Abnormality_of_blood_and_blood-forming_tissues	HABP2	HP:0001871	OMIM:188050	OP15
Abnormality_of_blood_and_blood-forming_tissues	HADH	HP:0001871	ORPHA:71212	OP15
Abnormality_of_blood_and_blood-forming_tissues	HADHB	HP:0001871	OMIM:620300	OP15
Abnormality_of_blood_and_blood-forming_tissues	HAMP	HP:0001871	OMIM:613313	OP15
Abnormality_of_blood_and_blood-forming_tissues	HAND2	HP:0001871	ORPHA:154	OP15
Abnormality_of_blood_and_blood-forming_tissues	HAVCR2	HP:0001871	OMIM:618398	OP15
Abnormality_of_blood_and_blood-forming_tissues	HAX1	HP:0001871	OMIM:610738	OP15
Abnormality_of_blood_and_blood-forming_tissues	HBA1	HP:0001871	OMIM:140700	OP15
Abnormality_of_blood_and_blood-forming_tissues	HBA2	HP:0001871	OMIM:140700	OP15
Abnormality_of_blood_and_blood-forming_tissues	HBB	HP:0001871	ORPHA:2133	OP15
Abnormality_of_blood_and_blood-forming_tissues	HBD	HP:0001871	ORPHA:231237	OP15
Abnormality_of_blood_and_blood-forming_tissues	HBG1	HP:0001871	ORPHA:251380	OP15
Abnormality_of_blood_and_blood-forming_tissues	HBG2	HP:0001871	ORPHA:251380	OP15
Abnormality_of_blood_and_blood-forming_tissues	HCK	HP:0001871	OMIM:620296	OP15
Abnormality_of_blood_and_blood-forming_tissues	HEATR3	HP:0001871	ORPHA:124	OP15
Abnormality_of_blood_and_blood-forming_tissues	HELLS	HP:0001871	OMIM:616911	OP15
Abnormality_of_blood_and_blood-forming_tissues	HEY2	HP:0001871	ORPHA:91387	OP15
Abnormality_of_blood_and_blood-forming_tissues	HIRA	HP:0001871	ORPHA:567	OP15
Abnormality_of_blood_and_blood-forming_tissues	HK1	HP:0001871	OMIM:235700	OP15
Abnormality_of_blood_and_blood-forming_tissues	HLA-B	HP:0001871	ORPHA:117	OP15
Abnormality_of_blood_and_blood-forming_tissues	HLA-B	HP:0001871	ORPHA:397	OP15
Abnormality_of_blood_and_blood-forming_tissues	HLA-DPA1	HP:0001871	ORPHA:900	OP15
Abnormality_of_blood_and_blood-forming_tissues	HLA-DPB1	HP:0001871	ORPHA:900	OP15
Abnormality_of_blood_and_blood-forming_tissues	HLA-DQA1	HP:0001871	OMIM:212750	OP15
Abnormality_of_blood_and_blood-forming_tissues	HLA-DQB1	HP:0001871	OMIM:212750	OP15
Abnormality_of_blood_and_blood-forming_tissues	HLA-DRB1	HP:0001871	ORPHA:397	OP15
Abnormality_of_blood_and_blood-forming_tissues	HLCS	HP:0001871	OMIM:253270	OP15
Abnormality_of_blood_and_blood-forming_tissues	HLCS	HP:0001871	ORPHA:79242	OP15
Abnormality_of_blood_and_blood-forming_tissues	HMCN1	HP:0001871	OMIM:603075	OP15
Abnormality_of_blood_and_blood-forming_tissues	HMGCL	HP:0001871	ORPHA:20	OP15
Abnormality_of_blood_and_blood-forming_tissues	HMOX1	HP:0001871	OMIM:614034	OP15
Abnormality_of_blood_and_blood-forming_tissues	HNF1A	HP:0001871	ORPHA:552	OP15
Abnormality_of_blood_and_blood-forming_tissues	HNF4A	HP:0001871	ORPHA:552	OP15
Abnormality_of_blood_and_blood-forming_tissues	HOXA11	HP:0001871	OMIM:605432	OP15
Abnormality_of_blood_and_blood-forming_tissues	HOXA11	HP:0001871	ORPHA:71289	OP15
Abnormality_of_blood_and_blood-forming_tissues	HPGD	HP:0001871	ORPHA:2796	OP15
Abnormality_of_blood_and_blood-forming_tissues	HPRT1	HP:0001871	ORPHA:510	OP15
Abnormality_of_blood_and_blood-forming_tissues	HPS1	HP:0001871	OMIM:203300	OP15
Abnormality_of_blood_and_blood-forming_tissues	HPS3	HP:0001871	OMIM:614072	OP15
Abnormality_of_blood_and_blood-forming_tissues	HPS4	HP:0001871	OMIM:614073	OP15
Abnormality_of_blood_and_blood-forming_tissues	HPS5	HP:0001871	OMIM:614074	OP15
Abnormality_of_blood_and_blood-forming_tissues	HPS6	HP:0001871	OMIM:614075	OP15
Abnormality_of_blood_and_blood-forming_tissues	HRG	HP:0001871	OMIM:613116	OP15
Abnormality_of_blood_and_blood-forming_tissues	HSCB	HP:0001871	OMIM:619523	OP15
Abnormality_of_blood_and_blood-forming_tissues	HSD17B10	HP:0001871	ORPHA:391457	OP15
Abnormality_of_blood_and_blood-forming_tissues	HSD3B7	HP:0001871	ORPHA:79301	OP15
Abnormality_of_blood_and_blood-forming_tissues	HSPA9	HP:0001871	OMIM:182170	OP15
Abnormality_of_blood_and_blood-forming_tissues	HTRA2	HP:0001871	OMIM:617248	OP15
Abnormality_of_blood_and_blood-forming_tissues	HYOU1	HP:0001871	OMIM:233600	OP15
Abnormality_of_blood_and_blood-forming_tissues	ICOS	HP:0001871	ORPHA:1572	OP15
Abnormality_of_blood_and_blood-forming_tissues	IDH1	HP:0001871	ORPHA:296	OP15
Abnormality_of_blood_and_blood-forming_tissues	IDH2	HP:0001871	ORPHA:296	OP15
Abnormality_of_blood_and_blood-forming_tissues	IFIH1	HP:0001871	OMIM:615846	OP15
Abnormality_of_blood_and_blood-forming_tissues	IFNG	HP:0001871	OMIM:609135	OP15
Abnormality_of_blood_and_blood-forming_tissues	IFNG	HP:0001871	ORPHA:88	OP15
Abnormality_of_blood_and_blood-forming_tissues	IFNGR1	HP:0001871	ORPHA:117	OP15
Abnormality_of_blood_and_blood-forming_tissues	IFT140	HP:0001871	OMIM:266920	OP15
Abnormality_of_blood_and_blood-forming_tissues	IGHG1	HP:0001871	ORPHA:536	OP15
Abnormality_of_blood_and_blood-forming_tissues	IGHG2	HP:0001871	ORPHA:183675	OP15
Abnormality_of_blood_and_blood-forming_tissues	IGHM	HP:0001871	OMIM:601495	OP15
Abnormality_of_blood_and_blood-forming_tissues	IGHM	HP:0001871	ORPHA:33110	OP15
Abnormality_of_blood_and_blood-forming_tissues	IGKC	HP:0001871	OMIM:614102	OP15
Abnormality_of_blood_and_blood-forming_tissues	IGLL1	HP:0001871	OMIM:613500	OP15
Abnormality_of_blood_and_blood-forming_tissues	IGLL1	HP:0001871	ORPHA:33110	OP15
Abnormality_of_blood_and_blood-forming_tissues	IKBKB	HP:0001871	OMIM:615592	OP15
Abnormality_of_blood_and_blood-forming_tissues	IKBKG	HP:0001871	ORPHA:98813	OP15
Abnormality_of_blood_and_blood-forming_tissues	IKZF1	HP:0001871	ORPHA:36426	OP15
Abnormality_of_blood_and_blood-forming_tissues	IKZF3	HP:0001871	OMIM:619437	OP15
Abnormality_of_blood_and_blood-forming_tissues	IKZF5	HP:0001871	OMIM:619130	OP15
Abnormality_of_blood_and_blood-forming_tissues	IL10	HP:0001871	ORPHA:117	OP15
Abnormality_of_blood_and_blood-forming_tissues	IL10RA	HP:0001871	OMIM:613148	OP15
Abnormality_of_blood_and_blood-forming_tissues	IL12A	HP:0001871	ORPHA:117	OP15
Abnormality_of_blood_and_blood-forming_tissues	IL12B	HP:0001871	ORPHA:3287	OP15
Abnormality_of_blood_and_blood-forming_tissues	IL12RB1	HP:0001871	ORPHA:186	OP15
Abnormality_of_blood_and_blood-forming_tissues	IL17RA	HP:0001871	OMIM:613953	OP15
Abnormality_of_blood_and_blood-forming_tissues	IL18BP	HP:0001871	OMIM:618549	OP15
Abnormality_of_blood_and_blood-forming_tissues	IL1RN	HP:0001871	OMIM:612852	OP15
Abnormality_of_blood_and_blood-forming_tissues	IL21	HP:0001871	OMIM:615767	OP15
Abnormality_of_blood_and_blood-forming_tissues	IL21R	HP:0001871	OMIM:615207	OP15
Abnormality_of_blood_and_blood-forming_tissues	IL23R	HP:0001871	ORPHA:117	OP15
Abnormality_of_blood_and_blood-forming_tissues	IL2RA	HP:0001871	ORPHA:85408	OP15
Abnormality_of_blood_and_blood-forming_tissues	IL2RB	HP:0001871	ORPHA:85408	OP15
Abnormality_of_blood_and_blood-forming_tissues	IL2RG	HP:0001871	OMIM:300400	OP15
Abnormality_of_blood_and_blood-forming_tissues	IL36RN	HP:0001871	OMIM:614204	OP15
Abnormality_of_blood_and_blood-forming_tissues	IL36RN	HP:0001871	ORPHA:247353	OP15
Abnormality_of_blood_and_blood-forming_tissues	IL37	HP:0001871	OMIM:619398	OP15
Abnormality_of_blood_and_blood-forming_tissues	IL4R	HP:0001871	OMIM:147050	OP15
Abnormality_of_blood_and_blood-forming_tissues	IL6R	HP:0001871	OMIM:618944	OP15
Abnormality_of_blood_and_blood-forming_tissues	IL6ST	HP:0001871	OMIM:619751	OP15
Abnormality_of_blood_and_blood-forming_tissues	IL7	HP:0001871	OMIM:618309	OP15
Abnormality_of_blood_and_blood-forming_tissues	IL7R	HP:0001871	ORPHA:169154	OP15
Abnormality_of_blood_and_blood-forming_tissues	INS	HP:0001871	OMIM:618858	OP15
Abnormality_of_blood_and_blood-forming_tissues	INS	HP:0001871	ORPHA:552	OP15
Abnormality_of_blood_and_blood-forming_tissues	IPO8	HP:0001871	OMIM:619472	OP15
Abnormality_of_blood_and_blood-forming_tissues	IRAK1	HP:0001871	ORPHA:93552	OP15
Abnormality_of_blood_and_blood-forming_tissues	IRAK4	HP:0001871	OMIM:607676	OP15
Abnormality_of_blood_and_blood-forming_tissues	IREB2	HP:0001871	OMIM:618451	OP15
Abnormality_of_blood_and_blood-forming_tissues	IRF2BP2	HP:0001871	ORPHA:520	OP15
Abnormality_of_blood_and_blood-forming_tissues	IRF4	HP:0001871	ORPHA:3452	OP15
Abnormality_of_blood_and_blood-forming_tissues	IRF5	HP:0001871	ORPHA:186	OP15
Abnormality_of_blood_and_blood-forming_tissues	IRF8	HP:0001871	OMIM:226990	OP15
Abnormality_of_blood_and_blood-forming_tissues	IRX5	HP:0001871	OMIM:611174	OP15
Abnormality_of_blood_and_blood-forming_tissues	ISCU	HP:0001871	OMIM:255125	OP15
Abnormality_of_blood_and_blood-forming_tissues	ITCH	HP:0001871	ORPHA:228426	OP15
Abnormality_of_blood_and_blood-forming_tissues	ITGA2	HP:0001871	ORPHA:853	OP15
Abnormality_of_blood_and_blood-forming_tissues	ITGA2B	HP:0001871	OMIM:273800	OP15
Abnormality_of_blood_and_blood-forming_tissues	ITGA2B	HP:0001871	ORPHA:849	OP15
Abnormality_of_blood_and_blood-forming_tissues	ITGA2B	HP:0001871	ORPHA:853	OP15
Abnormality_of_blood_and_blood-forming_tissues	ITGAM	HP:0001871	ORPHA:536	OP15
Abnormality_of_blood_and_blood-forming_tissues	ITGB2	HP:0001871	OMIM:116920	OP15
Abnormality_of_blood_and_blood-forming_tissues	ITGB3	HP:0001871	ORPHA:849	OP15
Abnormality_of_blood_and_blood-forming_tissues	ITGB3	HP:0001871	ORPHA:853	OP15
Abnormality_of_blood_and_blood-forming_tissues	ITGB4	HP:0001871	ORPHA:79402	OP15
Abnormality_of_blood_and_blood-forming_tissues	ITK	HP:0001871	OMIM:613011	OP15
Abnormality_of_blood_and_blood-forming_tissues	IVD	HP:0001871	OMIM:243500	OP15
Abnormality_of_blood_and_blood-forming_tissues	IVNS1ABP	HP:0001871	OMIM:618969	OP15
Abnormality_of_blood_and_blood-forming_tissues	JAGN1	HP:0001871	OMIM:616022	OP15
Abnormality_of_blood_and_blood-forming_tissues	JAK1	HP:0001871	OMIM:618999	OP15
Abnormality_of_blood_and_blood-forming_tissues	JAK2	HP:0001871	ORPHA:824	OP15
Abnormality_of_blood_and_blood-forming_tissues	JAK3	HP:0001871	OMIM:600802	OP15
Abnormality_of_blood_and_blood-forming_tissues	JAK3	HP:0001871	ORPHA:35078	OP15
Abnormality_of_blood_and_blood-forming_tissues	JAM2	HP:0001871	ORPHA:1980	OP15
Abnormality_of_blood_and_blood-forming_tissues	JAZF1	HP:0001871	ORPHA:536	OP15
Abnormality_of_blood_and_blood-forming_tissues	JMJD1C	HP:0001871	ORPHA:567	OP15
Abnormality_of_blood_and_blood-forming_tissues	JPH2	HP:0001871	ORPHA:154	OP15
Abnormality_of_blood_and_blood-forming_tissues	KANSL1	HP:0001871	ORPHA:363958	OP15
Abnormality_of_blood_and_blood-forming_tissues	KANSL1	HP:0001871	ORPHA:363965	OP15
Abnormality_of_blood_and_blood-forming_tissues	KARS1	HP:0001871	OMIM:619147	OP15
Abnormality_of_blood_and_blood-forming_tissues	KCNA5	HP:0001871	ORPHA:334	OP15
Abnormality_of_blood_and_blood-forming_tissues	KCNE1	HP:0001871	ORPHA:334	OP15
Abnormality_of_blood_and_blood-forming_tissues	KCNE2	HP:0001871	ORPHA:334	OP15
Abnormality_of_blood_and_blood-forming_tissues	KCNE5	HP:0001871	ORPHA:86818	OP15
Abnormality_of_blood_and_blood-forming_tissues	KCNJ1	HP:0001871	OMIM:241200	OP15
Abnormality_of_blood_and_blood-forming_tissues	KCNJ11	HP:0001871	OMIM:610582	OP15
Abnormality_of_blood_and_blood-forming_tissues	KCNJ11	HP:0001871	OMIM:616329	OP15
Abnormality_of_blood_and_blood-forming_tissues	KCNJ11	HP:0001871	ORPHA:552	OP15
Abnormality_of_blood_and_blood-forming_tissues	KCNJ11	HP:0001871	ORPHA:79134	OP15
Abnormality_of_blood_and_blood-forming_tissues	KCNJ2	HP:0001871	ORPHA:334	OP15
Abnormality_of_blood_and_blood-forming_tissues	KCNJ3	HP:0001871	ORPHA:334	OP15
Abnormality_of_blood_and_blood-forming_tissues	KCNJ5	HP:0001871	ORPHA:334	OP15
Abnormality_of_blood_and_blood-forming_tissues	KCNK3	HP:0001871	OMIM:615344	OP15
Abnormality_of_blood_and_blood-forming_tissues	KCNN4	HP:0001871	OMIM:616689	OP15
Abnormality_of_blood_and_blood-forming_tissues	KCNN4	HP:0001871	ORPHA:3202	OP15
Abnormality_of_blood_and_blood-forming_tissues	KCNQ1	HP:0001871	OMIM:607554	OP15
Abnormality_of_blood_and_blood-forming_tissues	KCNQ1	HP:0001871	ORPHA:334	OP15
Abnormality_of_blood_and_blood-forming_tissues	KDM6A	HP:0001871	OMIM:147920	OP15
Abnormality_of_blood_and_blood-forming_tissues	KHK	HP:0001871	ORPHA:2056	OP15
Abnormality_of_blood_and_blood-forming_tissues	KIAA0319L	HP:0001871	ORPHA:536	OP15
Abnormality_of_blood_and_blood-forming_tissues	KIF11	HP:0001871	ORPHA:2526	OP15
Abnormality_of_blood_and_blood-forming_tissues	KIF15	HP:0001871	OMIM:619981	OP15
Abnormality_of_blood_and_blood-forming_tissues	KIF1B	HP:0001871	OMIM:256700	OP15
Abnormality_of_blood_and_blood-forming_tissues	KIF20A	HP:0001871	ORPHA:75249	OP15
Abnormality_of_blood_and_blood-forming_tissues	KIF23	HP:0001871	ORPHA:98870	OP15
Abnormality_of_blood_and_blood-forming_tissues	KIT	HP:0001871	ORPHA:44890	OP15
Abnormality_of_blood_and_blood-forming_tissues	KLF1	HP:0001871	OMIM:613673	OP15
Abnormality_of_blood_and_blood-forming_tissues	KLF11	HP:0001871	ORPHA:552	OP15
Abnormality_of_blood_and_blood-forming_tissues	KLHDC8B	HP:0001871	OMIM:236000	OP15
Abnormality_of_blood_and_blood-forming_tissues	KLKB1	HP:0001871	OMIM:612423	OP15
Abnormality_of_blood_and_blood-forming_tissues	KLRC4	HP:0001871	ORPHA:117	OP15
Abnormality_of_blood_and_blood-forming_tissues	KMT2D	HP:0001871	OMIM:147920	OP15
Abnormality_of_blood_and_blood-forming_tissues	KNG1	HP:0001871	OMIM:228960	OP15
Abnormality_of_blood_and_blood-forming_tissues	KNSTRN	HP:0001871	ORPHA:221139	OP15
Abnormality_of_blood_and_blood-forming_tissues	KRAS	HP:0001871	ORPHA:144	OP15
Abnormality_of_blood_and_blood-forming_tissues	KRIT1	HP:0001871	ORPHA:221061	OP15
Abnormality_of_blood_and_blood-forming_tissues	KRT1	HP:0001871	ORPHA:79503	OP15
Abnormality_of_blood_and_blood-forming_tissues	KRT14	HP:0001871	ORPHA:79396	OP15
Abnormality_of_blood_and_blood-forming_tissues	KRT5	HP:0001871	ORPHA:79396	OP15
Abnormality_of_blood_and_blood-forming_tissues	KRT74	HP:0001871	ORPHA:90368	OP15
Abnormality_of_blood_and_blood-forming_tissues	KRT9	HP:0001871	OMIM:144200	OP15
Abnormality_of_blood_and_blood-forming_tissues	LACC1	HP:0001871	OMIM:618795	OP15
Abnormality_of_blood_and_blood-forming_tissues	LAMA3	HP:0001871	ORPHA:79402	OP15
Abnormality_of_blood_and_blood-forming_tissues	LAMA3	HP:0001871	ORPHA:79404	OP15
Abnormality_of_blood_and_blood-forming_tissues	LAMA4	HP:0001871	ORPHA:154	OP15
Abnormality_of_blood_and_blood-forming_tissues	LAMB2	HP:0001871	OMIM:609049	OP15
Abnormality_of_blood_and_blood-forming_tissues	LAMB3	HP:0001871	ORPHA:79402	OP15
Abnormality_of_blood_and_blood-forming_tissues	LAMB3	HP:0001871	ORPHA:79404	OP15
Abnormality_of_blood_and_blood-forming_tissues	LAMC2	HP:0001871	ORPHA:79402	OP15
Abnormality_of_blood_and_blood-forming_tissues	LAMC2	HP:0001871	ORPHA:79404	OP15
Abnormality_of_blood_and_blood-forming_tissues	LAMTOR2	HP:0001871	OMIM:610798	OP15
Abnormality_of_blood_and_blood-forming_tissues	LARS1	HP:0001871	OMIM:615438	OP15
Abnormality_of_blood_and_blood-forming_tissues	LARS2	HP:0001871	OMIM:617021	OP15
Abnormality_of_blood_and_blood-forming_tissues	LAT	HP:0001871	OMIM:617514	OP15
Abnormality_of_blood_and_blood-forming_tissues	LBR	HP:0001871	OMIM:215140	OP15
Abnormality_of_blood_and_blood-forming_tissues	LCAT	HP:0001871	OMIM:245900	OP15
Abnormality_of_blood_and_blood-forming_tissues	LCK	HP:0001871	OMIM:615758	OP15
Abnormality_of_blood_and_blood-forming_tissues	LCP2	HP:0001871	OMIM:619374	OP15
Abnormality_of_blood_and_blood-forming_tissues	LDB3	HP:0001871	ORPHA:154	OP15
Abnormality_of_blood_and_blood-forming_tissues	LEP	HP:0001871	ORPHA:66628	OP15
Abnormality_of_blood_and_blood-forming_tissues	LEPR	HP:0001871	ORPHA:179494	OP15
Abnormality_of_blood_and_blood-forming_tissues	LIG1	HP:0001871	OMIM:619774	OP15
Abnormality_of_blood_and_blood-forming_tissues	LIG3	HP:0001871	ORPHA:298	OP15
Abnormality_of_blood_and_blood-forming_tissues	LIG4	HP:0001871	ORPHA:99812	OP15
Abnormality_of_blood_and_blood-forming_tissues	LIPA	HP:0001871	OMIM:278000	OP15
Abnormality_of_blood_and_blood-forming_tissues	LMAN1	HP:0001871	OMIM:227300	OP15
Abnormality_of_blood_and_blood-forming_tissues	LMAN1	HP:0001871	ORPHA:35909	OP15
Abnormality_of_blood_and_blood-forming_tissues	LMBRD1	HP:0001871	ORPHA:79284	OP15
Abnormality_of_blood_and_blood-forming_tissues	LMNA	HP:0001871	ORPHA:300751	OP15
Abnormality_of_blood_and_blood-forming_tissues	LMNB2	HP:0001871	ORPHA:79087	OP15
Abnormality_of_blood_and_blood-forming_tissues	LMOD2	HP:0001871	OMIM:619897	OP15
Abnormality_of_blood_and_blood-forming_tissues	LMX1B	HP:0001871	ORPHA:495818	OP15
Abnormality_of_blood_and_blood-forming_tissues	LOX	HP:0001871	ORPHA:91387	OP15
Abnormality_of_blood_and_blood-forming_tissues	LPIN1	HP:0001871	ORPHA:99845	OP15
Abnormality_of_blood_and_blood-forming_tissues	LPIN2	HP:0001871	ORPHA:77297	OP15
Abnormality_of_blood_and_blood-forming_tissues	LPP	HP:0001871	OMIM:601626	OP15
Abnormality_of_blood_and_blood-forming_tissues	LRBA	HP:0001871	OMIM:614700	OP15
Abnormality_of_blood_and_blood-forming_tissues	LRP5	HP:0001871	ORPHA:2924	OP15
Abnormality_of_blood_and_blood-forming_tissues	LRPPRC	HP:0001871	OMIM:220111	OP15
Abnormality_of_blood_and_blood-forming_tissues	LRRC8A	HP:0001871	OMIM:613506	OP15
Abnormality_of_blood_and_blood-forming_tissues	LRRC8A	HP:0001871	ORPHA:33110	OP15
Abnormality_of_blood_and_blood-forming_tissues	LSM11	HP:0001871	ORPHA:51	OP15
Abnormality_of_blood_and_blood-forming_tissues	LYRM7	HP:0001871	OMIM:615838	OP15
Abnormality_of_blood_and_blood-forming_tissues	LYST	HP:0001871	OMIM:214500	OP15
Abnormality_of_blood_and_blood-forming_tissues	LZTR1	HP:0001871	OMIM:616564	OP15
Abnormality_of_blood_and_blood-forming_tissues	MAD2L2	HP:0001871	OMIM:617243	OP15
Abnormality_of_blood_and_blood-forming_tissues	MADD	HP:0001871	OMIM:619004	OP15
Abnormality_of_blood_and_blood-forming_tissues	MADD	HP:0001871	OMIM:619005	OP15
Abnormality_of_blood_and_blood-forming_tissues	MAGT1	HP:0001871	OMIM:300853	OP15
Abnormality_of_blood_and_blood-forming_tissues	MALT1	HP:0001871	ORPHA:52417	OP15
Abnormality_of_blood_and_blood-forming_tissues	MAN2B1	HP:0001871	OMIM:248500	OP15
Abnormality_of_blood_and_blood-forming_tissues	MAP1B	HP:0001871	ORPHA:98892	OP15
Abnormality_of_blood_and_blood-forming_tissues	MAP2K1	HP:0001871	OMIM:163950	OP15
Abnormality_of_blood_and_blood-forming_tissues	MAP2K2	HP:0001871	ORPHA:638	OP15
Abnormality_of_blood_and_blood-forming_tissues	MAPK1	HP:0001871	OMIM:619087	OP15
Abnormality_of_blood_and_blood-forming_tissues	MARS1	HP:0001871	OMIM:615486	OP15
Abnormality_of_blood_and_blood-forming_tissues	MARS2	HP:0001871	OMIM:616430	OP15
Abnormality_of_blood_and_blood-forming_tissues	MAT2A	HP:0001871	ORPHA:91387	OP15
Abnormality_of_blood_and_blood-forming_tissues	MAX	HP:0001871	OMIM:171300	OP15
Abnormality_of_blood_and_blood-forming_tissues	MAX	HP:0001871	ORPHA:29072	OP15
Abnormality_of_blood_and_blood-forming_tissues	MBD4	HP:0001871	OMIM:619975	OP15
Abnormality_of_blood_and_blood-forming_tissues	MCFD2	HP:0001871	OMIM:613625	OP15
Abnormality_of_blood_and_blood-forming_tissues	MCFD2	HP:0001871	ORPHA:35909	OP15
Abnormality_of_blood_and_blood-forming_tissues	MCM10	HP:0001871	OMIM:619313	OP15
Abnormality_of_blood_and_blood-forming_tissues	MCM4	HP:0001871	OMIM:609981	OP15
Abnormality_of_blood_and_blood-forming_tissues	MDH2	HP:0001871	ORPHA:29072	OP15
Abnormality_of_blood_and_blood-forming_tissues	MDM2	HP:0001871	ORPHA:524	OP15
Abnormality_of_blood_and_blood-forming_tissues	MDM4	HP:0001871	OMIM:618849	OP15
Abnormality_of_blood_and_blood-forming_tissues	MECOM	HP:0001871	ORPHA:71289	OP15
Abnormality_of_blood_and_blood-forming_tissues	MECP2	HP:0001871	ORPHA:536	OP15
Abnormality_of_blood_and_blood-forming_tissues	MED12	HP:0001871	OMIM:301068	OP15
Abnormality_of_blood_and_blood-forming_tissues	MEFV	HP:0001871	ORPHA:117	OP15
Abnormality_of_blood_and_blood-forming_tissues	MEN1	HP:0001871	ORPHA:652	OP15
Abnormality_of_blood_and_blood-forming_tissues	MET	HP:0001871	ORPHA:33402	OP15
Abnormality_of_blood_and_blood-forming_tissues	MFAP5	HP:0001871	ORPHA:91387	OP15
Abnormality_of_blood_and_blood-forming_tissues	MGAT2	HP:0001871	ORPHA:79329	OP15
Abnormality_of_blood_and_blood-forming_tissues	MICOS13	HP:0001871	OMIM:618329	OP15
Abnormality_of_blood_and_blood-forming_tissues	MICU1	HP:0001871	OMIM:615673	OP15
Abnormality_of_blood_and_blood-forming_tissues	MLH1	HP:0001871	ORPHA:144	OP15
Abnormality_of_blood_and_blood-forming_tissues	MLH3	HP:0001871	ORPHA:144	OP15
Abnormality_of_blood_and_blood-forming_tissues	MLLT10	HP:0001871	OMIM:601626	OP15
Abnormality_of_blood_and_blood-forming_tissues	MLX	HP:0001871	ORPHA:3287	OP15
Abnormality_of_blood_and_blood-forming_tissues	MMAA	HP:0001871	OMIM:251100	OP15
Abnormality_of_blood_and_blood-forming_tissues	MMAB	HP:0001871	OMIM:251110	OP15
Abnormality_of_blood_and_blood-forming_tissues	MMACHC	HP:0001871	ORPHA:79282	OP15
Abnormality_of_blood_and_blood-forming_tissues	MMADHC	HP:0001871	OMIM:277410	OP15
Abnormality_of_blood_and_blood-forming_tissues	MMEL1	HP:0001871	ORPHA:186	OP15
Abnormality_of_blood_and_blood-forming_tissues	MMP1	HP:0001871	OMIM:226600	OP15
Abnormality_of_blood_and_blood-forming_tissues	MMP1	HP:0001871	ORPHA:79408	OP15
Abnormality_of_blood_and_blood-forming_tissues	MMUT	HP:0001871	ORPHA:289916	OP15
Abnormality_of_blood_and_blood-forming_tissues	MMUT	HP:0001871	ORPHA:79312	OP15
Abnormality_of_blood_and_blood-forming_tissues	MOGS	HP:0001871	ORPHA:79330	OP15
Abnormality_of_blood_and_blood-forming_tissues	MPDU1	HP:0001871	OMIM:609180	OP15
Abnormality_of_blood_and_blood-forming_tissues	MPI	HP:0001871	ORPHA:79319	OP15
Abnormality_of_blood_and_blood-forming_tissues	MPIG6B	HP:0001871	OMIM:617441	OP15
Abnormality_of_blood_and_blood-forming_tissues	MPL	HP:0001871	ORPHA:824	OP15
Abnormality_of_blood_and_blood-forming_tissues	MPLKIP	HP:0001871	ORPHA:33364	OP15
Abnormality_of_blood_and_blood-forming_tissues	MPO	HP:0001871	OMIM:254600	OP15
Abnormality_of_blood_and_blood-forming_tissues	MRAS	HP:0001871	ORPHA:648	OP15
Abnormality_of_blood_and_blood-forming_tissues	MRPS7	HP:0001871	OMIM:617872	OP15
Abnormality_of_blood_and_blood-forming_tissues	MRTFA	HP:0001871	OMIM:618847	OP15
Abnormality_of_blood_and_blood-forming_tissues	MS4A1	HP:0001871	ORPHA:1572	OP15
Abnormality_of_blood_and_blood-forming_tissues	MS4A2	HP:0001871	OMIM:147050	OP15
Abnormality_of_blood_and_blood-forming_tissues	MSH2	HP:0001871	ORPHA:144	OP15
Abnormality_of_blood_and_blood-forming_tissues	MSH6	HP:0001871	ORPHA:144	OP15
Abnormality_of_blood_and_blood-forming_tissues	MSN	HP:0001871	OMIM:300988	OP15
Abnormality_of_blood_and_blood-forming_tissues	MST1	HP:0001871	ORPHA:171	OP15
Abnormality_of_blood_and_blood-forming_tissues	MT-CO1	HP:0001871	ORPHA:99845	OP15
Abnormality_of_blood_and_blood-forming_tissues	MT-CO2	HP:0001871	ORPHA:550	OP15
Abnormality_of_blood_and_blood-forming_tissues	MT-CO3	HP:0001871	ORPHA:99845	OP15
Abnormality_of_blood_and_blood-forming_tissues	MT-CYB	HP:0001871	ORPHA:137675	OP15
Abnormality_of_blood_and_blood-forming_tissues	MT-ND1	HP:0001871	ORPHA:550	OP15
Abnormality_of_blood_and_blood-forming_tissues	MT-ND4	HP:0001871	ORPHA:550	OP15
Abnormality_of_blood_and_blood-forming_tissues	MT-ND5	HP:0001871	ORPHA:550	OP15
Abnormality_of_blood_and_blood-forming_tissues	MT-ND6	HP:0001871	ORPHA:550	OP15
Abnormality_of_blood_and_blood-forming_tissues	MTAP	HP:0001871	OMIM:112250	OP15
Abnormality_of_blood_and_blood-forming_tissues	MTHFD1	HP:0001871	OMIM:617780	OP15
Abnormality_of_blood_and_blood-forming_tissues	MTHFR	HP:0001871	OMIM:188050	OP15
Abnormality_of_blood_and_blood-forming_tissues	MTOR	HP:0001871	OMIM:616638	OP15
Abnormality_of_blood_and_blood-forming_tissues	MTR	HP:0001871	OMIM:250940	OP15
Abnormality_of_blood_and_blood-forming_tissues	MTRR	HP:0001871	ORPHA:2169	OP15
Abnormality_of_blood_and_blood-forming_tissues	MTTP	HP:0001871	OMIM:200100	OP15
Abnormality_of_blood_and_blood-forming_tissues	MTTP	HP:0001871	ORPHA:14	OP15
Abnormality_of_blood_and_blood-forming_tissues	MTX2	HP:0001871	OMIM:619127	OP15
Abnormality_of_blood_and_blood-forming_tissues	MUC1	HP:0001871	OMIM:174000	OP15
Abnormality_of_blood_and_blood-forming_tissues	MUC5B	HP:0001871	OMIM:178500	OP15
Abnormality_of_blood_and_blood-forming_tissues	MVK	HP:0001871	ORPHA:343	OP15
Abnormality_of_blood_and_blood-forming_tissues	MYBPC3	HP:0001871	ORPHA:154	OP15
Abnormality_of_blood_and_blood-forming_tissues	MYC	HP:0001871	ORPHA:543	OP15
Abnormality_of_blood_and_blood-forming_tissues	MYD88	HP:0001871	OMIM:153600	OP15
Abnormality_of_blood_and_blood-forming_tissues	MYH11	HP:0001871	ORPHA:91387	OP15
Abnormality_of_blood_and_blood-forming_tissues	MYH6	HP:0001871	ORPHA:154	OP15
Abnormality_of_blood_and_blood-forming_tissues	MYH7	HP:0001871	ORPHA:1880	OP15
Abnormality_of_blood_and_blood-forming_tissues	MYH9	HP:0001871	ORPHA:182050	OP15
Abnormality_of_blood_and_blood-forming_tissues	MYL4	HP:0001871	ORPHA:334	OP15
Abnormality_of_blood_and_blood-forming_tissues	MYLK	HP:0001871	ORPHA:91387	OP15
Abnormality_of_blood_and_blood-forming_tissues	MYORG	HP:0001871	ORPHA:1980	OP15
Abnormality_of_blood_and_blood-forming_tissues	MYPN	HP:0001871	ORPHA:75249	OP15
Abnormality_of_blood_and_blood-forming_tissues	MYRF	HP:0001871	OMIM:618280	OP15
Abnormality_of_blood_and_blood-forming_tissues	MYSM1	HP:0001871	OMIM:618116	OP15
Abnormality_of_blood_and_blood-forming_tissues	MYSM1	HP:0001871	ORPHA:508542	OP15
Abnormality_of_blood_and_blood-forming_tissues	NAA10	HP:0001871	OMIM:300855	OP15
Abnormality_of_blood_and_blood-forming_tissues	NABP1	HP:0001871	ORPHA:520	OP15
Abnormality_of_blood_and_blood-forming_tissues	NAE1	HP:0001871	OMIM:620210	OP15
Abnormality_of_blood_and_blood-forming_tissues	NAF1	HP:0001871	OMIM:620365	OP15
Abnormality_of_blood_and_blood-forming_tissues	NAGA	HP:0001871	OMIM:609242	OP15
Abnormality_of_blood_and_blood-forming_tissues	NAGS	HP:0001871	ORPHA:927	OP15
Abnormality_of_blood_and_blood-forming_tissues	NARS2	HP:0001871	ORPHA:79134	OP15
Abnormality_of_blood_and_blood-forming_tissues	NAXD	HP:0001871	OMIM:618321	OP15
Abnormality_of_blood_and_blood-forming_tissues	NBAS	HP:0001871	OMIM:616483	OP15
Abnormality_of_blood_and_blood-forming_tissues	NBEAL2	HP:0001871	OMIM:139090	OP15
Abnormality_of_blood_and_blood-forming_tissues	NBN	HP:0001871	OMIM:609135	OP15
Abnormality_of_blood_and_blood-forming_tissues	NCAPG2	HP:0001871	OMIM:618460	OP15
Abnormality_of_blood_and_blood-forming_tissues	NCF1	HP:0001871	OMIM:233700	OP15
Abnormality_of_blood_and_blood-forming_tissues	NCF2	HP:0001871	OMIM:233710	OP15
Abnormality_of_blood_and_blood-forming_tissues	NCF4	HP:0001871	ORPHA:379	OP15
Abnormality_of_blood_and_blood-forming_tissues	NCKAP1L	HP:0001871	OMIM:618982	OP15
Abnormality_of_blood_and_blood-forming_tissues	NDE1	HP:0001871	ORPHA:2177	OP15
Abnormality_of_blood_and_blood-forming_tissues	NDP	HP:0001871	ORPHA:891	OP15
Abnormality_of_blood_and_blood-forming_tissues	NDP	HP:0001871	ORPHA:90050	OP15
Abnormality_of_blood_and_blood-forming_tissues	NDUFA6	HP:0001871	OMIM:618253	OP15
Abnormality_of_blood_and_blood-forming_tissues	NDUFB7	HP:0001871	OMIM:620135	OP15
Abnormality_of_blood_and_blood-forming_tissues	NEDD4L	HP:0001871	ORPHA:98892	OP15
Abnormality_of_blood_and_blood-forming_tissues	NEU1	HP:0001871	OMIM:256550	OP15
Abnormality_of_blood_and_blood-forming_tissues	NEUROD1	HP:0001871	ORPHA:552	OP15
Abnormality_of_blood_and_blood-forming_tissues	NEXN	HP:0001871	ORPHA:154	OP15
Abnormality_of_blood_and_blood-forming_tissues	NF1	HP:0001871	ORPHA:97685	OP15
Abnormality_of_blood_and_blood-forming_tissues	NF2	HP:0001871	ORPHA:2495	OP15
Abnormality_of_blood_and_blood-forming_tissues	NFATC2	HP:0001871	OMIM:620232	OP15
Abnormality_of_blood_and_blood-forming_tissues	NFE2L2	HP:0001871	OMIM:617744	OP15
Abnormality_of_blood_and_blood-forming_tissues	NFIA	HP:0001871	ORPHA:401986	OP15
Abnormality_of_blood_and_blood-forming_tissues	NFIX	HP:0001871	ORPHA:561	OP15
Abnormality_of_blood_and_blood-forming_tissues	NFKB1	HP:0001871	ORPHA:1572	OP15
Abnormality_of_blood_and_blood-forming_tissues	NFKB2	HP:0001871	ORPHA:293978	OP15
Abnormality_of_blood_and_blood-forming_tissues	NFKBIA	HP:0001871	ORPHA:98813	OP15
Abnormality_of_blood_and_blood-forming_tissues	NFS1	HP:0001871	OMIM:619386	OP15
Abnormality_of_blood_and_blood-forming_tissues	NGLY1	HP:0001871	ORPHA:404454	OP15
Abnormality_of_blood_and_blood-forming_tissues	NHEJ1	HP:0001871	ORPHA:169079	OP15
Abnormality_of_blood_and_blood-forming_tissues	NHLRC2	HP:0001871	OMIM:618278	OP15
Abnormality_of_blood_and_blood-forming_tissues	NHP2	HP:0001871	OMIM:224230	OP15
Abnormality_of_blood_and_blood-forming_tissues	NHP2	HP:0001871	OMIM:613987	OP15
Abnormality_of_blood_and_blood-forming_tissues	NHP2	HP:0001871	ORPHA:1775	OP15
Abnormality_of_blood_and_blood-forming_tissues	NIPBL	HP:0001871	OMIM:122470	OP15
Abnormality_of_blood_and_blood-forming_tissues	NKX2-5	HP:0001871	ORPHA:334	OP15
Abnormality_of_blood_and_blood-forming_tissues	NKX2-6	HP:0001871	ORPHA:334	OP15
Abnormality_of_blood_and_blood-forming_tissues	NLRC4	HP:0001871	OMIM:616050	OP15
Abnormality_of_blood_and_blood-forming_tissues	NLRP1	HP:0001871	OMIM:617388	OP15
Abnormality_of_blood_and_blood-forming_tissues	NLRP12	HP:0001871	OMIM:611762	OP15
Abnormality_of_blood_and_blood-forming_tissues	NLRP3	HP:0001871	OMIM:120100	OP15
Abnormality_of_blood_and_blood-forming_tissues	NLRP3	HP:0001871	OMIM:191900	OP15
Abnormality_of_blood_and_blood-forming_tissues	NLRP3	HP:0001871	OMIM:607115	OP15
Abnormality_of_blood_and_blood-forming_tissues	NLRP3	HP:0001871	ORPHA:1451	OP15
Abnormality_of_blood_and_blood-forming_tissues	NOD2	HP:0001871	ORPHA:90340	OP15
Abnormality_of_blood_and_blood-forming_tissues	NOP10	HP:0001871	OMIM:224230	OP15
Abnormality_of_blood_and_blood-forming_tissues	NOP10	HP:0001871	ORPHA:1775	OP15
Abnormality_of_blood_and_blood-forming_tissues	NOS3	HP:0001871	OMIM:189800	OP15
Abnormality_of_blood_and_blood-forming_tissues	NOTCH1	HP:0001871	ORPHA:974	OP15
Abnormality_of_blood_and_blood-forming_tissues	NOTCH3	HP:0001871	ORPHA:136	OP15
Abnormality_of_blood_and_blood-forming_tissues	NPC1	HP:0001871	OMIM:257220	OP15
Abnormality_of_blood_and_blood-forming_tissues	NPC2	HP:0001871	OMIM:607625	OP15
Abnormality_of_blood_and_blood-forming_tissues	NPHP1	HP:0001871	OMIM:256100	OP15
Abnormality_of_blood_and_blood-forming_tissues	NPHP1	HP:0001871	OMIM:266900	OP15
Abnormality_of_blood_and_blood-forming_tissues	NPHP4	HP:0001871	OMIM:606966	OP15
Abnormality_of_blood_and_blood-forming_tissues	NPHP4	HP:0001871	OMIM:606996	OP15
Abnormality_of_blood_and_blood-forming_tissues	NPM1	HP:0001871	ORPHA:1775	OP15
Abnormality_of_blood_and_blood-forming_tissues	NPPA	HP:0001871	ORPHA:334	OP15
Abnormality_of_blood_and_blood-forming_tissues	NR1H4	HP:0001871	OMIM:617049	OP15
Abnormality_of_blood_and_blood-forming_tissues	NR3C1	HP:0001871	ORPHA:96253	OP15
Abnormality_of_blood_and_blood-forming_tissues	NRAS	HP:0001871	OMIM:614470	OP15
Abnormality_of_blood_and_blood-forming_tissues	NSD1	HP:0001871	ORPHA:821	OP15
Abnormality_of_blood_and_blood-forming_tissues	NSMCE2	HP:0001871	OMIM:617253	OP15
Abnormality_of_blood_and_blood-forming_tissues	NSMCE3	HP:0001871	OMIM:617241	OP15
Abnormality_of_blood_and_blood-forming_tissues	NSUN2	HP:0001871	ORPHA:235	OP15
Abnormality_of_blood_and_blood-forming_tissues	NT5C3A	HP:0001871	OMIM:266120	OP15
Abnormality_of_blood_and_blood-forming_tissues	NTHL1	HP:0001871	ORPHA:454840	OP15
Abnormality_of_blood_and_blood-forming_tissues	NTRK1	HP:0001871	ORPHA:642	OP15
Abnormality_of_blood_and_blood-forming_tissues	NUMA1	HP:0001871	ORPHA:520	OP15
Abnormality_of_blood_and_blood-forming_tissues	NUP155	HP:0001871	ORPHA:334	OP15
Abnormality_of_blood_and_blood-forming_tissues	NUP214	HP:0001871	OMIM:601626	OP15
Abnormality_of_blood_and_blood-forming_tissues	NUTM1	HP:0001871	ORPHA:443167	OP15
Abnormality_of_blood_and_blood-forming_tissues	OAS1	HP:0001871	OMIM:618042	OP15
Abnormality_of_blood_and_blood-forming_tissues	OBSCN	HP:0001871	ORPHA:99845	OP15
Abnormality_of_blood_and_blood-forming_tissues	OCLN	HP:0001871	OMIM:251290	OP15
Abnormality_of_blood_and_blood-forming_tissues	OCRL	HP:0001871	ORPHA:534	OP15
Abnormality_of_blood_and_blood-forming_tissues	OPA1	HP:0001871	ORPHA:98673	OP15
Abnormality_of_blood_and_blood-forming_tissues	ORAI1	HP:0001871	OMIM:612782	OP15
Abnormality_of_blood_and_blood-forming_tissues	OSTM1	HP:0001871	OMIM:259720	OP15
Abnormality_of_blood_and_blood-forming_tissues	OTC	HP:0001871	OMIM:311250	OP15
Abnormality_of_blood_and_blood-forming_tissues	OTUD5	HP:0001871	OMIM:301056	OP15
Abnormality_of_blood_and_blood-forming_tissues	OTULIN	HP:0001871	OMIM:617099	OP15
Abnormality_of_blood_and_blood-forming_tissues	P2RY12	HP:0001871	OMIM:609821	OP15
Abnormality_of_blood_and_blood-forming_tissues	P4HA2	HP:0001871	ORPHA:397	OP15
Abnormality_of_blood_and_blood-forming_tissues	PACS2	HP:0001871	OMIM:618067	OP15
Abnormality_of_blood_and_blood-forming_tissues	PALB2	HP:0001871	ORPHA:84	OP15
Abnormality_of_blood_and_blood-forming_tissues	PANK2	HP:0001871	OMIM:234200	OP15
Abnormality_of_blood_and_blood-forming_tissues	PANK2	HP:0001871	OMIM:607236	OP15
Abnormality_of_blood_and_blood-forming_tissues	PARN	HP:0001871	OMIM:616353	OP15
Abnormality_of_blood_and_blood-forming_tissues	PARN	HP:0001871	ORPHA:1775	OP15
Abnormality_of_blood_and_blood-forming_tissues	PARN	HP:0001871	ORPHA:3322	OP15
Abnormality_of_blood_and_blood-forming_tissues	PAX2	HP:0001871	ORPHA:97362	OP15
Abnormality_of_blood_and_blood-forming_tissues	PAX4	HP:0001871	ORPHA:552	OP15
Abnormality_of_blood_and_blood-forming_tissues	PBX1	HP:0001871	ORPHA:97362	OP15
Abnormality_of_blood_and_blood-forming_tissues	PCCA	HP:0001871	OMIM:606054	OP15
Abnormality_of_blood_and_blood-forming_tissues	PCCB	HP:0001871	OMIM:606054	OP15
Abnormality_of_blood_and_blood-forming_tissues	PCNT	HP:0001871	ORPHA:2637	OP15
Abnormality_of_blood_and_blood-forming_tissues	PDCD1	HP:0001871	ORPHA:536	OP15
Abnormality_of_blood_and_blood-forming_tissues	PDCD10	HP:0001871	OMIM:603285	OP15
Abnormality_of_blood_and_blood-forming_tissues	PDCD10	HP:0001871	ORPHA:221061	OP15
Abnormality_of_blood_and_blood-forming_tissues	PDE11A	HP:0001871	ORPHA:1359	OP15
Abnormality_of_blood_and_blood-forming_tissues	PDGFB	HP:0001871	ORPHA:1980	OP15
Abnormality_of_blood_and_blood-forming_tissues	PDGFRA	HP:0001871	ORPHA:44890	OP15
Abnormality_of_blood_and_blood-forming_tissues	PDGFRB	HP:0001871	OMIM:131440	OP15
Abnormality_of_blood_and_blood-forming_tissues	PDX1	HP:0001871	ORPHA:552	OP15
Abnormality_of_blood_and_blood-forming_tissues	PEPD	HP:0001871	OMIM:170100	OP15
Abnormality_of_blood_and_blood-forming_tissues	PET100	HP:0001871	OMIM:619055	OP15
Abnormality_of_blood_and_blood-forming_tissues	PEX1	HP:0001871	ORPHA:912	OP15
Abnormality_of_blood_and_blood-forming_tissues	PEX10	HP:0001871	ORPHA:912	OP15
Abnormality_of_blood_and_blood-forming_tissues	PEX11B	HP:0001871	ORPHA:912	OP15
Abnormality_of_blood_and_blood-forming_tissues	PEX12	HP:0001871	ORPHA:912	OP15
Abnormality_of_blood_and_blood-forming_tissues	PEX13	HP:0001871	ORPHA:912	OP15
Abnormality_of_blood_and_blood-forming_tissues	PEX14	HP:0001871	ORPHA:912	OP15
Abnormality_of_blood_and_blood-forming_tissues	PEX16	HP:0001871	ORPHA:912	OP15
Abnormality_of_blood_and_blood-forming_tissues	PEX19	HP:0001871	ORPHA:912	OP15
Abnormality_of_blood_and_blood-forming_tissues	PEX2	HP:0001871	ORPHA:912	OP15
Abnormality_of_blood_and_blood-forming_tissues	PEX26	HP:0001871	ORPHA:912	OP15
Abnormality_of_blood_and_blood-forming_tissues	PEX3	HP:0001871	ORPHA:912	OP15
Abnormality_of_blood_and_blood-forming_tissues	PEX5	HP:0001871	ORPHA:912	OP15
Abnormality_of_blood_and_blood-forming_tissues	PEX6	HP:0001871	ORPHA:912	OP15
Abnormality_of_blood_and_blood-forming_tissues	PFKM	HP:0001871	OMIM:232800	OP15
Abnormality_of_blood_and_blood-forming_tissues	PGK1	HP:0001871	OMIM:300653	OP15
Abnormality_of_blood_and_blood-forming_tissues	PGK1	HP:0001871	ORPHA:713	OP15
Abnormality_of_blood_and_blood-forming_tissues	PGM1	HP:0001871	OMIM:614921	OP15
Abnormality_of_blood_and_blood-forming_tissues	PGM3	HP:0001871	ORPHA:443811	OP15
Abnormality_of_blood_and_blood-forming_tissues	PHF21A	HP:0001871	ORPHA:52022	OP15
Abnormality_of_blood_and_blood-forming_tissues	PHGDH	HP:0001871	OMIM:601815	OP15
Abnormality_of_blood_and_blood-forming_tissues	PHGDH	HP:0001871	ORPHA:79351	OP15
Abnormality_of_blood_and_blood-forming_tissues	PHKA2	HP:0001871	ORPHA:264580	OP15
Abnormality_of_blood_and_blood-forming_tissues	PHKB	HP:0001871	ORPHA:79240	OP15
Abnormality_of_blood_and_blood-forming_tissues	PHKG2	HP:0001871	ORPHA:264580	OP15
Abnormality_of_blood_and_blood-forming_tissues	PI4KA	HP:0001871	ORPHA:436252	OP15
Abnormality_of_blood_and_blood-forming_tissues	PICALM	HP:0001871	OMIM:601626	OP15
Abnormality_of_blood_and_blood-forming_tissues	PIEZO1	HP:0001871	OMIM:194380	OP15
Abnormality_of_blood_and_blood-forming_tissues	PIGA	HP:0001871	ORPHA:447	OP15
Abnormality_of_blood_and_blood-forming_tissues	PIGL	HP:0001871	ORPHA:3474	OP15
Abnormality_of_blood_and_blood-forming_tissues	PIGM	HP:0001871	OMIM:610293	OP15
Abnormality_of_blood_and_blood-forming_tissues	PIGT	HP:0001871	ORPHA:369837	OP15
Abnormality_of_blood_and_blood-forming_tissues	PIK3CA	HP:0001871	ORPHA:144	OP15
Abnormality_of_blood_and_blood-forming_tissues	PIK3CD	HP:0001871	OMIM:619281	OP15
Abnormality_of_blood_and_blood-forming_tissues	PIK3CG	HP:0001871	OMIM:619802	OP15
Abnormality_of_blood_and_blood-forming_tissues	PIK3R1	HP:0001871	OMIM:615214	OP15
Abnormality_of_blood_and_blood-forming_tissues	PIK3R1	HP:0001871	ORPHA:33110	OP15
Abnormality_of_blood_and_blood-forming_tissues	PITX2	HP:0001871	ORPHA:334	OP15
Abnormality_of_blood_and_blood-forming_tissues	PKHD1	HP:0001871	ORPHA:731	OP15
Abnormality_of_blood_and_blood-forming_tissues	PKLR	HP:0001871	ORPHA:766	OP15
Abnormality_of_blood_and_blood-forming_tissues	PLA2G4A	HP:0001871	OMIM:618372	OP15
Abnormality_of_blood_and_blood-forming_tissues	PLA2G7	HP:0001871	OMIM:147050	OP15
Abnormality_of_blood_and_blood-forming_tissues	PLAU	HP:0001871	OMIM:601709	OP15
Abnormality_of_blood_and_blood-forming_tissues	PLCG2	HP:0001871	OMIM:614878	OP15
Abnormality_of_blood_and_blood-forming_tissues	PLEC	HP:0001871	OMIM:226670	OP15
Abnormality_of_blood_and_blood-forming_tissues	PLEKHM1	HP:0001871	OMIM:618107	OP15
Abnormality_of_blood_and_blood-forming_tissues	PLEKHM1	HP:0001871	ORPHA:210110	OP15
Abnormality_of_blood_and_blood-forming_tissues	PLG	HP:0001871	OMIM:217090	OP15
Abnormality_of_blood_and_blood-forming_tissues	PLN	HP:0001871	ORPHA:154	OP15
Abnormality_of_blood_and_blood-forming_tissues	PLOD1	HP:0001871	OMIM:225400	OP15
Abnormality_of_blood_and_blood-forming_tissues	PLOD3	HP:0001871	OMIM:612394	OP15
Abnormality_of_blood_and_blood-forming_tissues	PLVAP	HP:0001871	OMIM:618183	OP15
Abnormality_of_blood_and_blood-forming_tissues	PML	HP:0001871	ORPHA:520	OP15
Abnormality_of_blood_and_blood-forming_tissues	PMM2	HP:0001871	OMIM:212065	OP15
Abnormality_of_blood_and_blood-forming_tissues	PMM2	HP:0001871	ORPHA:79318	OP15
Abnormality_of_blood_and_blood-forming_tissues	PMS1	HP:0001871	ORPHA:144	OP15
Abnormality_of_blood_and_blood-forming_tissues	PMS2	HP:0001871	ORPHA:144	OP15
Abnormality_of_blood_and_blood-forming_tissues	PNP	HP:0001871	OMIM:613179	OP15
Abnormality_of_blood_and_blood-forming_tissues	PNPLA2	HP:0001871	ORPHA:565612	OP15
Abnormality_of_blood_and_blood-forming_tissues	PNPO	HP:0001871	ORPHA:79096	OP15
Abnormality_of_blood_and_blood-forming_tissues	POLE	HP:0001871	OMIM:615139	OP15
Abnormality_of_blood_and_blood-forming_tissues	POLG	HP:0001871	ORPHA:298	OP15
Abnormality_of_blood_and_blood-forming_tissues	POLRMT	HP:0001871	OMIM:619743	OP15
Abnormality_of_blood_and_blood-forming_tissues	POMP	HP:0001871	OMIM:618048	OP15
Abnormality_of_blood_and_blood-forming_tissues	POT1	HP:0001871	OMIM:620368	OP15
Abnormality_of_blood_and_blood-forming_tissues	POU2AF1	HP:0001871	ORPHA:186	OP15
Abnormality_of_blood_and_blood-forming_tissues	PPCS	HP:0001871	ORPHA:154	OP15
Abnormality_of_blood_and_blood-forming_tissues	PPIL1	HP:0001871	OMIM:619301	OP15
Abnormality_of_blood_and_blood-forming_tissues	PPOX	HP:0001871	ORPHA:79473	OP15
Abnormality_of_blood_and_blood-forming_tissues	PPT1	HP:0001871	OMIM:256730	OP15
Abnormality_of_blood_and_blood-forming_tissues	PRDM16	HP:0001871	ORPHA:154	OP15
Abnormality_of_blood_and_blood-forming_tissues	PRDM5	HP:0001871	OMIM:614170	OP15
Abnormality_of_blood_and_blood-forming_tissues	PRDM5	HP:0001871	ORPHA:90354	OP15
Abnormality_of_blood_and_blood-forming_tissues	PRDX1	HP:0001871	OMIM:277400	OP15
Abnormality_of_blood_and_blood-forming_tissues	PRF1	HP:0001871	OMIM:609135	OP15
Abnormality_of_blood_and_blood-forming_tissues	PRF1	HP:0001871	ORPHA:88	OP15
Abnormality_of_blood_and_blood-forming_tissues	PRIM1	HP:0001871	OMIM:620005	OP15
Abnormality_of_blood_and_blood-forming_tissues	PRKACA	HP:0001871	ORPHA:289	OP15
Abnormality_of_blood_and_blood-forming_tissues	PRKACB	HP:0001871	ORPHA:289	OP15
Abnormality_of_blood_and_blood-forming_tissues	PRKACG	HP:0001871	OMIM:616176	OP15
Abnormality_of_blood_and_blood-forming_tissues	PRKAR1A	HP:0001871	ORPHA:520	OP15
Abnormality_of_blood_and_blood-forming_tissues	PRKCD	HP:0001871	ORPHA:3261	OP15
Abnormality_of_blood_and_blood-forming_tissues	PRKCSH	HP:0001871	ORPHA:2924	OP15
Abnormality_of_blood_and_blood-forming_tissues	PRKDC	HP:0001871	OMIM:615966	OP15
Abnormality_of_blood_and_blood-forming_tissues	PRKG1	HP:0001871	ORPHA:91387	OP15
Abnormality_of_blood_and_blood-forming_tissues	PRLR	HP:0001871	OMIM:615555	OP15
Abnormality_of_blood_and_blood-forming_tissues	PRLR	HP:0001871	ORPHA:397685	OP15
Abnormality_of_blood_and_blood-forming_tissues	PROC	HP:0001871	OMIM:176860	OP15
Abnormality_of_blood_and_blood-forming_tissues	PROC	HP:0001871	OMIM:612304	OP15
Abnormality_of_blood_and_blood-forming_tissues	PRORP	HP:0001871	OMIM:619737	OP15
Abnormality_of_blood_and_blood-forming_tissues	PROS1	HP:0001871	OMIM:612336	OP15
Abnormality_of_blood_and_blood-forming_tissues	PROS1	HP:0001871	OMIM:614514	OP15
Abnormality_of_blood_and_blood-forming_tissues	PROS1	HP:0001871	ORPHA:743	OP15
Abnormality_of_blood_and_blood-forming_tissues	PRPS1	HP:0001871	ORPHA:1187	OP15
Abnormality_of_blood_and_blood-forming_tissues	PRSS1	HP:0001871	OMIM:167800	OP15
Abnormality_of_blood_and_blood-forming_tissues	PRSS2	HP:0001871	OMIM:167800	OP15
Abnormality_of_blood_and_blood-forming_tissues	PRTN3	HP:0001871	ORPHA:900	OP15
Abnormality_of_blood_and_blood-forming_tissues	PSAP	HP:0001871	OMIM:610539	OP15
Abnormality_of_blood_and_blood-forming_tissues	PSEN1	HP:0001871	ORPHA:154	OP15
Abnormality_of_blood_and_blood-forming_tissues	PSEN2	HP:0001871	ORPHA:154	OP15
Abnormality_of_blood_and_blood-forming_tissues	PSMB4	HP:0001871	OMIM:617591	OP15
Abnormality_of_blood_and_blood-forming_tissues	PSMB8	HP:0001871	OMIM:256040	OP15
Abnormality_of_blood_and_blood-forming_tissues	PSMB9	HP:0001871	OMIM:617591	OP15
Abnormality_of_blood_and_blood-forming_tissues	PSMC1	HP:0001871	OMIM:620071	OP15
Abnormality_of_blood_and_blood-forming_tissues	PSMG2	HP:0001871	OMIM:619183	OP15
Abnormality_of_blood_and_blood-forming_tissues	PSTPIP1	HP:0001871	ORPHA:69126	OP15
Abnormality_of_blood_and_blood-forming_tissues	PTEN	HP:0001871	ORPHA:744	OP15
Abnormality_of_blood_and_blood-forming_tissues	PTF1A	HP:0001871	OMIM:609069	OP15
Abnormality_of_blood_and_blood-forming_tissues	PTH1R	HP:0001871	ORPHA:296	OP15
Abnormality_of_blood_and_blood-forming_tissues	PTPN11	HP:0001871	OMIM:163950	OP15
Abnormality_of_blood_and_blood-forming_tissues	PTPN2	HP:0001871	ORPHA:85408	OP15
Abnormality_of_blood_and_blood-forming_tissues	PTPN22	HP:0001871	ORPHA:397	OP15
Abnormality_of_blood_and_blood-forming_tissues	PTPRC	HP:0001871	OMIM:619924	OP15
Abnormality_of_blood_and_blood-forming_tissues	PUF60	HP:0001871	ORPHA:508488	OP15
Abnormality_of_blood_and_blood-forming_tissues	PUS1	HP:0001871	OMIM:600462	OP15
Abnormality_of_blood_and_blood-forming_tissues	PXK	HP:0001871	ORPHA:536	OP15
Abnormality_of_blood_and_blood-forming_tissues	PYCR1	HP:0001871	OMIM:612940	OP15
Abnormality_of_blood_and_blood-forming_tissues	QRSL1	HP:0001871	OMIM:618835	OP15
Abnormality_of_blood_and_blood-forming_tissues	RAB27A	HP:0001871	OMIM:607624	OP15
Abnormality_of_blood_and_blood-forming_tissues	RAB27A	HP:0001871	ORPHA:79477	OP15
Abnormality_of_blood_and_blood-forming_tissues	RAC2	HP:0001871	OMIM:608203	OP15
Abnormality_of_blood_and_blood-forming_tissues	RACGAP1	HP:0001871	OMIM:619789	OP15
Abnormality_of_blood_and_blood-forming_tissues	RAD50	HP:0001871	OMIM:613078	OP15
Abnormality_of_blood_and_blood-forming_tissues	RAD51	HP:0001871	OMIM:617244	OP15
Abnormality_of_blood_and_blood-forming_tissues	RAD51C	HP:0001871	ORPHA:84	OP15
Abnormality_of_blood_and_blood-forming_tissues	RAD54B	HP:0001871	OMIM:605027	OP15
Abnormality_of_blood_and_blood-forming_tissues	RAD54L	HP:0001871	OMIM:605027	OP15
Abnormality_of_blood_and_blood-forming_tissues	RAF1	HP:0001871	ORPHA:648	OP15
Abnormality_of_blood_and_blood-forming_tissues	RAG1	HP:0001871	ORPHA:331206	OP15
Abnormality_of_blood_and_blood-forming_tissues	RAG2	HP:0001871	ORPHA:331206	OP15
Abnormality_of_blood_and_blood-forming_tissues	RANBP2	HP:0001871	ORPHA:88619	OP15
Abnormality_of_blood_and_blood-forming_tissues	RARA	HP:0001871	ORPHA:520	OP15
Abnormality_of_blood_and_blood-forming_tissues	RASA1	HP:0001871	ORPHA:90307	OP15
Abnormality_of_blood_and_blood-forming_tissues	RASA2	HP:0001871	ORPHA:648	OP15
Abnormality_of_blood_and_blood-forming_tissues	RASGRP1	HP:0001871	ORPHA:3261	OP15
Abnormality_of_blood_and_blood-forming_tissues	RASGRP2	HP:0001871	OMIM:615888	OP15
Abnormality_of_blood_and_blood-forming_tissues	RB1	HP:0001871	OMIM:180200	OP15
Abnormality_of_blood_and_blood-forming_tissues	RBCK1	HP:0001871	OMIM:615895	OP15
Abnormality_of_blood_and_blood-forming_tissues	RBM10	HP:0001871	OMIM:311900	OP15
Abnormality_of_blood_and_blood-forming_tissues	RBM20	HP:0001871	ORPHA:154	OP15
Abnormality_of_blood_and_blood-forming_tissues	RBM8A	HP:0001871	OMIM:274000	OP15
Abnormality_of_blood_and_blood-forming_tissues	RBPJ	HP:0001871	ORPHA:974	OP15
Abnormality_of_blood_and_blood-forming_tissues	RECQL	HP:0001871	OMIM:620370	OP15
Abnormality_of_blood_and_blood-forming_tissues	RECQL4	HP:0001871	ORPHA:221016	OP15
Abnormality_of_blood_and_blood-forming_tissues	REL	HP:0001871	OMIM:619652	OP15
Abnormality_of_blood_and_blood-forming_tissues	RELB	HP:0001871	OMIM:617585	OP15
Abnormality_of_blood_and_blood-forming_tissues	REN	HP:0001871	OMIM:613092	OP15
Abnormality_of_blood_and_blood-forming_tissues	RET	HP:0001871	OMIM:171300	OP15
Abnormality_of_blood_and_blood-forming_tissues	RET	HP:0001871	ORPHA:276621	OP15
Abnormality_of_blood_and_blood-forming_tissues	RET	HP:0001871	ORPHA:29072	OP15
Abnormality_of_blood_and_blood-forming_tissues	RFT1	HP:0001871	ORPHA:244310	OP15
Abnormality_of_blood_and_blood-forming_tissues	RFWD3	HP:0001871	ORPHA:84	OP15
Abnormality_of_blood_and_blood-forming_tissues	RFX5	HP:0001871	OMIM:209920	OP15
Abnormality_of_blood_and_blood-forming_tissues	RFXANK	HP:0001871	OMIM:209920	OP15
Abnormality_of_blood_and_blood-forming_tissues	RFXAP	HP:0001871	OMIM:209920	OP15
Abnormality_of_blood_and_blood-forming_tissues	RHAG	HP:0001871	OMIM:185000	OP15
Abnormality_of_blood_and_blood-forming_tissues	RHAG	HP:0001871	OMIM:268150	OP15
Abnormality_of_blood_and_blood-forming_tissues	RHAG	HP:0001871	ORPHA:3203	OP15
Abnormality_of_blood_and_blood-forming_tissues	RHAG	HP:0001871	ORPHA:71275	OP15
Abnormality_of_blood_and_blood-forming_tissues	RHBDF2	HP:0001871	ORPHA:2198	OP15
Abnormality_of_blood_and_blood-forming_tissues	RHCE	HP:0001871	ORPHA:71275	OP15
Abnormality_of_blood_and_blood-forming_tissues	RHD	HP:0001871	ORPHA:71275	OP15
Abnormality_of_blood_and_blood-forming_tissues	RHOH	HP:0001871	OMIM:618307	OP15
Abnormality_of_blood_and_blood-forming_tissues	RIN2	HP:0001871	OMIM:613075	OP15
Abnormality_of_blood_and_blood-forming_tissues	RINT1	HP:0001871	OMIM:618641	OP15
Abnormality_of_blood_and_blood-forming_tissues	RIPK1	HP:0001871	OMIM:618852	OP15
Abnormality_of_blood_and_blood-forming_tissues	RIT1	HP:0001871	ORPHA:648	OP15
Abnormality_of_blood_and_blood-forming_tissues	RNASEH2A	HP:0001871	ORPHA:51	OP15
Abnormality_of_blood_and_blood-forming_tissues	RNASEH2B	HP:0001871	ORPHA:51	OP15
Abnormality_of_blood_and_blood-forming_tissues	RNASEH2C	HP:0001871	ORPHA:51	OP15
Abnormality_of_blood_and_blood-forming_tissues	RNF113A	HP:0001871	ORPHA:33364	OP15
Abnormality_of_blood_and_blood-forming_tissues	RNF168	HP:0001871	ORPHA:420741	OP15
Abnormality_of_blood_and_blood-forming_tissues	RNF43	HP:0001871	ORPHA:157798	OP15
Abnormality_of_blood_and_blood-forming_tissues	RPA1	HP:0001871	OMIM:619767	OP15
Abnormality_of_blood_and_blood-forming_tissues	RPGRIP1L	HP:0001871	OMIM:619113	OP15
Abnormality_of_blood_and_blood-forming_tissues	RPL11	HP:0001871	ORPHA:124	OP15
Abnormality_of_blood_and_blood-forming_tissues	RPL13	HP:0001871	OMIM:618728	OP15
Abnormality_of_blood_and_blood-forming_tissues	RPL15	HP:0001871	ORPHA:124	OP15
Abnormality_of_blood_and_blood-forming_tissues	RPL18	HP:0001871	ORPHA:124	OP15
Abnormality_of_blood_and_blood-forming_tissues	RPL26	HP:0001871	ORPHA:124	OP15
Abnormality_of_blood_and_blood-forming_tissues	RPL27	HP:0001871	ORPHA:124	OP15
Abnormality_of_blood_and_blood-forming_tissues	RPL31	HP:0001871	ORPHA:124	OP15
Abnormality_of_blood_and_blood-forming_tissues	RPL35	HP:0001871	ORPHA:124	OP15
Abnormality_of_blood_and_blood-forming_tissues	RPL35A	HP:0001871	ORPHA:124	OP15
Abnormality_of_blood_and_blood-forming_tissues	RPL3L	HP:0001871	ORPHA:154	OP15
Abnormality_of_blood_and_blood-forming_tissues	RPL5	HP:0001871	ORPHA:124	OP15
Abnormality_of_blood_and_blood-forming_tissues	RPL8	HP:0001871	ORPHA:124	OP15
Abnormality_of_blood_and_blood-forming_tissues	RPL9	HP:0001871	ORPHA:124	OP15
Abnormality_of_blood_and_blood-forming_tissues	RPS10	HP:0001871	ORPHA:124	OP15
Abnormality_of_blood_and_blood-forming_tissues	RPS14	HP:0001871	ORPHA:86841	OP15
Abnormality_of_blood_and_blood-forming_tissues	RPS15A	HP:0001871	ORPHA:124	OP15
Abnormality_of_blood_and_blood-forming_tissues	RPS17	HP:0001871	ORPHA:124	OP15
Abnormality_of_blood_and_blood-forming_tissues	RPS19	HP:0001871	ORPHA:124	OP15
Abnormality_of_blood_and_blood-forming_tissues	RPS20	HP:0001871	ORPHA:124	OP15
Abnormality_of_blood_and_blood-forming_tissues	RPS24	HP:0001871	ORPHA:124	OP15
Abnormality_of_blood_and_blood-forming_tissues	RPS26	HP:0001871	ORPHA:124	OP15
Abnormality_of_blood_and_blood-forming_tissues	RPS27	HP:0001871	ORPHA:124	OP15
Abnormality_of_blood_and_blood-forming_tissues	RPS28	HP:0001871	ORPHA:124	OP15
Abnormality_of_blood_and_blood-forming_tissues	RPS29	HP:0001871	ORPHA:124	OP15
Abnormality_of_blood_and_blood-forming_tissues	RPS7	HP:0001871	ORPHA:124	OP15
Abnormality_of_blood_and_blood-forming_tissues	RPSA	HP:0001871	OMIM:271400	OP15
Abnormality_of_blood_and_blood-forming_tissues	RRAS	HP:0001871	ORPHA:648	OP15
Abnormality_of_blood_and_blood-forming_tissues	RRAS2	HP:0001871	ORPHA:648	OP15
Abnormality_of_blood_and_blood-forming_tissues	RREB1	HP:0001871	ORPHA:567	OP15
Abnormality_of_blood_and_blood-forming_tissues	RRM2B	HP:0001871	ORPHA:298	OP15
Abnormality_of_blood_and_blood-forming_tissues	RS1	HP:0001871	OMIM:312700	OP15
Abnormality_of_blood_and_blood-forming_tissues	RTEL1	HP:0001871	OMIM:615190	OP15
Abnormality_of_blood_and_blood-forming_tissues	RTEL1	HP:0001871	ORPHA:1775	OP15
Abnormality_of_blood_and_blood-forming_tissues	RTEL1	HP:0001871	ORPHA:3322	OP15
Abnormality_of_blood_and_blood-forming_tissues	RUNX1	HP:0001871	ORPHA:98850	OP15
Abnormality_of_blood_and_blood-forming_tissues	RYR1	HP:0001871	ORPHA:466650	OP15
Abnormality_of_blood_and_blood-forming_tissues	SAA1	HP:0001871	ORPHA:85445	OP15
Abnormality_of_blood_and_blood-forming_tissues	SALL4	HP:0001871	OMIM:147750	OP15
Abnormality_of_blood_and_blood-forming_tissues	SALL4	HP:0001871	ORPHA:2307	OP15
Abnormality_of_blood_and_blood-forming_tissues	SAMD9	HP:0001871	OMIM:619041	OP15
Abnormality_of_blood_and_blood-forming_tissues	SAMD9L	HP:0001871	OMIM:252270	OP15
Abnormality_of_blood_and_blood-forming_tissues	SAMHD1	HP:0001871	ORPHA:51	OP15
Abnormality_of_blood_and_blood-forming_tissues	SAR1B	HP:0001871	ORPHA:71	OP15
Abnormality_of_blood_and_blood-forming_tissues	SARS2	HP:0001871	OMIM:613845	OP15
Abnormality_of_blood_and_blood-forming_tissues	SASH3	HP:0001871	OMIM:301082	OP15
Abnormality_of_blood_and_blood-forming_tissues	SAT1	HP:0001871	ORPHA:93552	OP15
Abnormality_of_blood_and_blood-forming_tissues	SBDS	HP:0001871	OMIM:609135	OP15
Abnormality_of_blood_and_blood-forming_tissues	SBDS	HP:0001871	ORPHA:811	OP15
Abnormality_of_blood_and_blood-forming_tissues	SBDS	HP:0001871	ORPHA:88	OP15
Abnormality_of_blood_and_blood-forming_tissues	SC5D	HP:0001871	OMIM:607330	OP15
Abnormality_of_blood_and_blood-forming_tissues	SCARB2	HP:0001871	ORPHA:77259	OP15
Abnormality_of_blood_and_blood-forming_tissues	SCN10A	HP:0001871	ORPHA:90026	OP15
Abnormality_of_blood_and_blood-forming_tissues	SCN11A	HP:0001871	ORPHA:90026	OP15
Abnormality_of_blood_and_blood-forming_tissues	SCN1B	HP:0001871	ORPHA:334	OP15
Abnormality_of_blood_and_blood-forming_tissues	SCN2B	HP:0001871	ORPHA:334	OP15
Abnormality_of_blood_and_blood-forming_tissues	SCN3B	HP:0001871	ORPHA:334	OP15
Abnormality_of_blood_and_blood-forming_tissues	SCN4B	HP:0001871	ORPHA:334	OP15
Abnormality_of_blood_and_blood-forming_tissues	SCN5A	HP:0001871	ORPHA:334	OP15
Abnormality_of_blood_and_blood-forming_tissues	SCN9A	HP:0001871	ORPHA:90026	OP15
Abnormality_of_blood_and_blood-forming_tissues	SDHA	HP:0001871	ORPHA:44890	OP15
Abnormality_of_blood_and_blood-forming_tissues	SDHAF2	HP:0001871	ORPHA:29072	OP15
Abnormality_of_blood_and_blood-forming_tissues	SDHB	HP:0001871	ORPHA:44890	OP15
Abnormality_of_blood_and_blood-forming_tissues	SDHB	HP:0001871	ORPHA:97286	OP15
Abnormality_of_blood_and_blood-forming_tissues	SDHC	HP:0001871	ORPHA:44890	OP15
Abnormality_of_blood_and_blood-forming_tissues	SDHC	HP:0001871	ORPHA:97286	OP15
Abnormality_of_blood_and_blood-forming_tissues	SDHD	HP:0001871	ORPHA:97286	OP15
Abnormality_of_blood_and_blood-forming_tissues	SEC23B	HP:0001871	OMIM:224100	OP15
Abnormality_of_blood_and_blood-forming_tissues	SEC24C	HP:0001871	ORPHA:567	OP15
Abnormality_of_blood_and_blood-forming_tissues	SEC61A1	HP:0001871	OMIM:617056	OP15
Abnormality_of_blood_and_blood-forming_tissues	SEC63	HP:0001871	ORPHA:2924	OP15
Abnormality_of_blood_and_blood-forming_tissues	SEMA4A	HP:0001871	ORPHA:440437	OP15
Abnormality_of_blood_and_blood-forming_tissues	SEMA4D	HP:0001871	ORPHA:171	OP15
Abnormality_of_blood_and_blood-forming_tissues	SERAC1	HP:0001871	OMIM:614739	OP15
Abnormality_of_blood_and_blood-forming_tissues	SERPINA6	HP:0001871	OMIM:611489	OP15
Abnormality_of_blood_and_blood-forming_tissues	SERPINC1	HP:0001871	ORPHA:82	OP15
Abnormality_of_blood_and_blood-forming_tissues	SERPIND1	HP:0001871	OMIM:612356	OP15
Abnormality_of_blood_and_blood-forming_tissues	SERPINE1	HP:0001871	ORPHA:465	OP15
Abnormality_of_blood_and_blood-forming_tissues	SERPINF2	HP:0001871	OMIM:262850	OP15
Abnormality_of_blood_and_blood-forming_tissues	SERPINF2	HP:0001871	ORPHA:79	OP15
Abnormality_of_blood_and_blood-forming_tissues	SETBP1	HP:0001871	ORPHA:798	OP15
Abnormality_of_blood_and_blood-forming_tissues	SETD2	HP:0001871	ORPHA:821	OP15
Abnormality_of_blood_and_blood-forming_tissues	SETX	HP:0001871	OMIM:606002	OP15
Abnormality_of_blood_and_blood-forming_tissues	SF3B1	HP:0001871	ORPHA:75564	OP15
Abnormality_of_blood_and_blood-forming_tissues	SFTPA2	HP:0001871	OMIM:178500	OP15
Abnormality_of_blood_and_blood-forming_tissues	SFTPC	HP:0001871	OMIM:178500	OP15
Abnormality_of_blood_and_blood-forming_tissues	SFXN4	HP:0001871	OMIM:615578	OP15
Abnormality_of_blood_and_blood-forming_tissues	SGCD	HP:0001871	ORPHA:154	OP15
Abnormality_of_blood_and_blood-forming_tissues	SGCG	HP:0001871	ORPHA:353	OP15
Abnormality_of_blood_and_blood-forming_tissues	SGPL1	HP:0001871	OMIM:617575	OP15
Abnormality_of_blood_and_blood-forming_tissues	SH2B3	HP:0001871	ORPHA:3318	OP15
[truncated: 50,172 more rows]
