# Supplementary material for: Evolutionarily new genes in humans with disease phenotypes reveal functional enrichment patterns shaped by adaptive innovation and sexual selection
Source: bioRxiv preprint, doi:10.1101/2023.11.14.567139, version 7 (2024-09-04)
Supplement: Supplemental Table S6 [file 567139_file15.xlsx]

## Sheet: Sheet1
S6. Ka/Ks for species pairs of human-chimpanzee, human-bonobo, human-macaque
Gene	Ka/Ks	Pairs
ENSG00000000005	0.516129	Human-Chimpanzee
ENSG00000000419	0.155914	Human-Chimpanzee
ENSG00000000457	0.964286	Human-Chimpanzee
ENSG00000000460	0.256579	Human-Chimpanzee
ENSG00000000971	0.579439	Human-Chimpanzee
ENSG00000001084	0.304348	Human-Chimpanzee
ENSG00000001460	0.222222	Human-Chimpanzee
ENSG00000001461	0.498891	Human-Chimpanzee
ENSG00000001497	1.10638	Human-Chimpanzee
ENSG00000001617	0.239437	Human-Chimpanzee
ENSG00000001626	0.269841	Human-Chimpanzee
ENSG00000002016	0.701245	Human-Chimpanzee
ENSG00000002586	0.624254	Human-Chimpanzee
ENSG00000002587	0.0679612	Human-Chimpanzee
ENSG00000002745	0.190244	Human-Chimpanzee
ENSG00000002746	0.26087	Human-Chimpanzee
ENSG00000002822	0.0982906	Human-Chimpanzee
ENSG00000002919	0.742268	Human-Chimpanzee
ENSG00000003096	0.0933333	Human-Chimpanzee
ENSG00000003137	0.0458453	Human-Chimpanzee
ENSG00000003147	0.213953	Human-Chimpanzee
ENSG00000003393	0.130435	Human-Chimpanzee
ENSG00000003400	0.651056	Human-Chimpanzee
ENSG00000003402	1.21053	Human-Chimpanzee
ENSG00000003436	0.178082	Human-Chimpanzee
ENSG00000003509	0.207547	Human-Chimpanzee
ENSG00000003756	0.251613	Human-Chimpanzee
ENSG00000003987	0.173554	Human-Chimpanzee
ENSG00000003989	0.312183	Human-Chimpanzee
ENSG00000004142	0.22314	Human-Chimpanzee
ENSG00000004399	0.147727	Human-Chimpanzee
ENSG00000004455	0.322034	Human-Chimpanzee
ENSG00000004468	0.509804	Human-Chimpanzee
ENSG00000004478	0.16129	Human-Chimpanzee
ENSG00000004487	0.0789474	Human-Chimpanzee
ENSG00000004534	1.81818	Human-Chimpanzee
ENSG00000004660	0.164384	Human-Chimpanzee
ENSG00000004700	0.0740741	Human-Chimpanzee
ENSG00000004766	0.204545	Human-Chimpanzee
ENSG00000004777	0.44717	Human-Chimpanzee
ENSG00000004799	0.0628931	Human-Chimpanzee
ENSG00000004809	0.266436	Human-Chimpanzee
ENSG00000004838	0.153846	Human-Chimpanzee
ENSG00000004846	0.31746	Human-Chimpanzee
ENSG00000004848	0.349505	Human-Chimpanzee
ENSG00000004939	0.327586	Human-Chimpanzee
ENSG00000004948	0.679348	Human-Chimpanzee
ENSG00000005020	0.112903	Human-Chimpanzee
ENSG00000005022	0.107143	Human-Chimpanzee
ENSG00000005059	1.11765	Human-Chimpanzee
ENSG00000005100	0.176871	Human-Chimpanzee
ENSG00000005108	0.0860927	Human-Chimpanzee
ENSG00000005156	0.674419	Human-Chimpanzee
ENSG00000005175	0.346939	Human-Chimpanzee
ENSG00000005187	0.68	Human-Chimpanzee
ENSG00000005189	0.37931	Human-Chimpanzee
ENSG00000005194	0.226131	Human-Chimpanzee
ENSG00000005206	0.281977	Human-Chimpanzee
ENSG00000005238	0.375	Human-Chimpanzee
ENSG00000005243	0.253165	Human-Chimpanzee
ENSG00000005249	0.583333	Human-Chimpanzee
ENSG00000005339	0.0294118	Human-Chimpanzee
ENSG00000005421	0.5625	Human-Chimpanzee
ENSG00000005436	0.323944	Human-Chimpanzee
ENSG00000005448	0.388889	Human-Chimpanzee
ENSG00000005469	0.233333	Human-Chimpanzee
ENSG00000005471	0.268293	Human-Chimpanzee
ENSG00000005483	0.12069	Human-Chimpanzee
ENSG00000005513	0.031401	Human-Chimpanzee
ENSG00000005700	0.457627	Human-Chimpanzee
ENSG00000005810	0.0470588	Human-Chimpanzee
ENSG00000005884	0.35098	Human-Chimpanzee
ENSG00000005889	0.179104	Human-Chimpanzee
ENSG00000005893	1.42308	Human-Chimpanzee
ENSG00000005961	0.684129	Human-Chimpanzee
ENSG00000005981	0.0797101	Human-Chimpanzee
ENSG00000006007	0.128713	Human-Chimpanzee
ENSG00000006015	0.314607	Human-Chimpanzee
ENSG00000006016	0.154839	Human-Chimpanzee
ENSG00000006025	0.0956938	Human-Chimpanzee
ENSG00000006059	0.128472	Human-Chimpanzee
ENSG00000006062	0.218182	Human-Chimpanzee
ENSG00000006071	0.0536585	Human-Chimpanzee
ENSG00000006118	0.321637	Human-Chimpanzee
ENSG00000006128	1.45892	Human-Chimpanzee
ENSG00000006194	0.7	Human-Chimpanzee
ENSG00000006210	0.542636	Human-Chimpanzee
ENSG00000006282	0.193103	Human-Chimpanzee
ENSG00000006283	0.0742857	Human-Chimpanzee
ENSG00000006432	0.426471	Human-Chimpanzee
ENSG00000006459	0.296296	Human-Chimpanzee
ENSG00000006468	0.450704	Human-Chimpanzee
ENSG00000006534	0.119816	Human-Chimpanzee
ENSG00000006555	0.0501792	Human-Chimpanzee
ENSG00000006576	0.231707	Human-Chimpanzee
ENSG00000006607	0.755102	Human-Chimpanzee
ENSG00000006611	0.255924	Human-Chimpanzee
ENSG00000006638	0.184156	Human-Chimpanzee
ENSG00000006652	0.194444	Human-Chimpanzee
ENSG00000006695	0.621061	Human-Chimpanzee
ENSG00000006712	0.25641	Human-Chimpanzee
ENSG00000006740	0.0866142	Human-Chimpanzee
ENSG00000006744	0.481132	Human-Chimpanzee
ENSG00000006757	0.276316	Human-Chimpanzee
ENSG00000006788	0.367508	Human-Chimpanzee
ENSG00000006837	0.888889	Human-Chimpanzee
ENSG00000007001	0.429577	Human-Chimpanzee
ENSG00000007062	0.238994	Human-Chimpanzee
ENSG00000007168	0.52	Human-Chimpanzee
ENSG00000007171	0.141975	Human-Chimpanzee
ENSG00000007174	0.375	Human-Chimpanzee
ENSG00000007202	0.290323	Human-Chimpanzee
ENSG00000007216	0.188742	Human-Chimpanzee
ENSG00000007264	0.0454545	Human-Chimpanzee
ENSG00000007312	0.121311	Human-Chimpanzee
ENSG00000007314	0.0366972	Human-Chimpanzee
ENSG00000007341	1.23077	Human-Chimpanzee
ENSG00000007350	1.26335	Human-Chimpanzee
ENSG00000007376	0.087146	Human-Chimpanzee
ENSG00000007384	0.0125945	Human-Chimpanzee
ENSG00000007402	0.137681	Human-Chimpanzee
ENSG00000007520	0.153558	Human-Chimpanzee
ENSG00000007541	0.404878	Human-Chimpanzee
ENSG00000007545	0.260606	Human-Chimpanzee
ENSG00000007908	0.403941	Human-Chimpanzee
ENSG00000007923	0.0444444	Human-Chimpanzee
ENSG00000007933	0.0818182	Human-Chimpanzee
ENSG00000007944	0.15625	Human-Chimpanzee
ENSG00000007952	0.264706	Human-Chimpanzee
ENSG00000007968	0.2	Human-Chimpanzee
ENSG00000008083	0.146667	Human-Chimpanzee
ENSG00000008086	0.431034	Human-Chimpanzee
ENSG00000008118	0.0414747	Human-Chimpanzee
ENSG00000008130	0.331915	Human-Chimpanzee
ENSG00000008196	1.02899	Human-Chimpanzee
ENSG00000008226	0.527778	Human-Chimpanzee
ENSG00000008283	0.428571	Human-Chimpanzee
ENSG00000008294	0.135593	Human-Chimpanzee
ENSG00000008300	0.287879	Human-Chimpanzee
ENSG00000008311	0.115942	Human-Chimpanzee
ENSG00000008323	0.0978261	Human-Chimpanzee
ENSG00000008382	0.0806846	Human-Chimpanzee
ENSG00000008405	0.169811	Human-Chimpanzee
ENSG00000008438	0.828571	Human-Chimpanzee
ENSG00000008441	0.324561	Human-Chimpanzee
ENSG00000008513	0.124378	Human-Chimpanzee
ENSG00000008710	0.351598	Human-Chimpanzee
ENSG00000008735	0.0501253	Human-Chimpanzee
ENSG00000008853	0.0714286	Human-Chimpanzee
ENSG00000008869	0.0104712	Human-Chimpanzee
ENSG00000008988	0.5	Human-Chimpanzee
ENSG00000009307	0.162162	Human-Chimpanzee
ENSG00000009335	0.0649351	Human-Chimpanzee
ENSG00000009413	0.314815	Human-Chimpanzee
ENSG00000009694	0.1	Human-Chimpanzee
ENSG00000009709	0.388033	Human-Chimpanzee
ENSG00000009765	0.528947	Human-Chimpanzee
ENSG00000009790	0.609375	Human-Chimpanzee
ENSG00000009830	0.038961	Human-Chimpanzee
ENSG00000009954	0.125	Human-Chimpanzee
ENSG00000010072	0.147059	Human-Chimpanzee
ENSG00000010165	0.141414	Human-Chimpanzee
ENSG00000010219	0.606061	Human-Chimpanzee
ENSG00000010244	0.415	Human-Chimpanzee
ENSG00000010278	0.136691	Human-Chimpanzee
ENSG00000010282	0.20904	Human-Chimpanzee
ENSG00000010292	0.431373	Human-Chimpanzee
ENSG00000010310	0.308511	Human-Chimpanzee
ENSG00000010318	0.330189	Human-Chimpanzee
ENSG00000010319	0.0519481	Human-Chimpanzee
ENSG00000010322	0.107143	Human-Chimpanzee
ENSG00000010327	0.218978	Human-Chimpanzee
ENSG00000010379	0.153061	Human-Chimpanzee
ENSG00000010404	1.08571	Human-Chimpanzee
ENSG00000010438	0.313531	Human-Chimpanzee
ENSG00000010610	0.2287	Human-Chimpanzee
ENSG00000010626	0.195312	Human-Chimpanzee
ENSG00000010704	0.517241	Human-Chimpanzee
ENSG00000010803	0.12963	Human-Chimpanzee
ENSG00000010818	0.197531	Human-Chimpanzee
ENSG00000010932	0.319328	Human-Chimpanzee
ENSG00000011007	0.312977	Human-Chimpanzee
ENSG00000011021	0.322245	Human-Chimpanzee
ENSG00000011028	0.0482759	Human-Chimpanzee
ENSG00000011052	0.117241	Human-Chimpanzee
ENSG00000011083	0.290984	Human-Chimpanzee
ENSG00000011105	0.0643939	Human-Chimpanzee
ENSG00000011114	0.488372	Human-Chimpanzee
ENSG00000011132	0.379121	Human-Chimpanzee
ENSG00000011143	0.223684	Human-Chimpanzee
ENSG00000011201	0.0510949	Human-Chimpanzee
ENSG00000011243	0.144796	Human-Chimpanzee
ENSG00000011295	0.130952	Human-Chimpanzee
ENSG00000011304	0.113821	Human-Chimpanzee
ENSG00000011347	0.176056	Human-Chimpanzee
ENSG00000011376	0.0776699	Human-Chimpanzee
ENSG00000011405	0.150794	Human-Chimpanzee
ENSG00000011422	0.180556	Human-Chimpanzee
ENSG00000011426	0.141176	Human-Chimpanzee
ENSG00000011451	0.0909091	Human-Chimpanzee
ENSG00000011454	0.329268	Human-Chimpanzee
ENSG00000011478	0.0984252	Human-Chimpanzee
ENSG00000011485	0.15884	Human-Chimpanzee
ENSG00000011523	0.921053	Human-Chimpanzee
ENSG00000011566	0.267857	Human-Chimpanzee
ENSG00000011590	0.527559	Human-Chimpanzee
ENSG00000011600	0.663366	Human-Chimpanzee
ENSG00000012048	1.65957	Human-Chimpanzee
ENSG00000012171	0.275449	Human-Chimpanzee
ENSG00000012174	0.075067	Human-Chimpanzee
ENSG00000012232	0.034965	Human-Chimpanzee
ENSG00000012504	0.0882353	Human-Chimpanzee
ENSG00000012779	0.0878378	Human-Chimpanzee
ENSG00000012822	0.215385	Human-Chimpanzee
ENSG00000012983	0.166667	Human-Chimpanzee
ENSG00000013016	0.0392157	Human-Chimpanzee
ENSG00000013275	0.31441	Human-Chimpanzee
ENSG00000013288	0.130542	Human-Chimpanzee
ENSG00000013293	0.159664	Human-Chimpanzee
ENSG00000013297	0.0958904	Human-Chimpanzee
ENSG00000013306	0.791444	Human-Chimpanzee
ENSG00000013375	0.333333	Human-Chimpanzee
ENSG00000013441	0.541667	Human-Chimpanzee
ENSG00000013523	0.198529	Human-Chimpanzee
ENSG00000013561	0.144737	Human-Chimpanzee
ENSG00000013563	0.0381679	Human-Chimpanzee
ENSG00000013573	0.452229	Human-Chimpanzee
ENSG00000013588	0.271277	Human-Chimpanzee
ENSG00000013619	0.988439	Human-Chimpanzee
ENSG00000013725	0.526582	Human-Chimpanzee
ENSG00000013810	0.28972	Human-Chimpanzee
ENSG00000014123	0.333333	Human-Chimpanzee
ENSG00000014138	0.236111	Human-Chimpanzee
ENSG00000014164	0.511364	Human-Chimpanzee
ENSG00000014216	0.255208	Human-Chimpanzee
ENSG00000014257	0.48	Human-Chimpanzee
ENSG00000014641	0.577778	Human-Chimpanzee
ENSG00000014824	0.326203	Human-Chimpanzee
ENSG00000014914	0.177215	Human-Chimpanzee
ENSG00000015133	0.307692	Human-Chimpanzee
ENSG00000015413	0.265781	Human-Chimpanzee
ENSG00000015520	0.197044	Human-Chimpanzee
ENSG00000015532	0.12931	Human-Chimpanzee
ENSG00000015592	0.311111	Human-Chimpanzee
ENSG00000015676	0.19697	Human-Chimpanzee
ENSG00000016391	0.216418	Human-Chimpanzee
ENSG00000016402	0.173077	Human-Chimpanzee
ENSG00000016490	0.327044	Human-Chimpanzee
ENSG00000016602	0.4375	Human-Chimpanzee
ENSG00000016864	0.120879	Human-Chimpanzee
ENSG00000017260	0.416667	Human-Chimpanzee
ENSG00000017427	0.27618	Human-Chimpanzee
ENSG00000017797	0.157895	Human-Chimpanzee
ENSG00000018189	0.106667	Human-Chimpanzee
ENSG00000018236	0.191753	Human-Chimpanzee
ENSG00000018280	0.261364	Human-Chimpanzee
ENSG00000018510	0.0636364	Human-Chimpanzee
ENSG00000018699	0.159091	Human-Chimpanzee
ENSG00000018869	0.183673	Human-Chimpanzee
ENSG00000019102	0.266055	Human-Chimpanzee
ENSG00000019144	0.145833	Human-Chimpanzee
ENSG00000019169	0.493671	Human-Chimpanzee
ENSG00000019186	0.558442	Human-Chimpanzee
ENSG00000019485	0.0974359	Human-Chimpanzee
ENSG00000019505	0.10473	Human-Chimpanzee
ENSG00000019582	0.0496454	Human-Chimpanzee
ENSG00000019991	0.466667	Human-Chimpanzee
ENSG00000019995	0.0697674	Human-Chimpanzee
ENSG00000020181	0.112245	Human-Chimpanzee
ENSG00000020256	0.161491	Human-Chimpanzee
ENSG00000020577	0.0522388	Human-Chimpanzee
ENSG00000020922	0.707965	Human-Chimpanzee
ENSG00000021300	0.124579	Human-Chimpanzee
ENSG00000021355	0.442177	Human-Chimpanzee
ENSG00000021461	0.262295	Human-Chimpanzee
ENSG00000021488	0.241758	Human-Chimpanzee
ENSG00000021645	0.0326087	Human-Chimpanzee
ENSG00000021762	0.384248	Human-Chimpanzee
ENSG00000021776	0.0636364	Human-Chimpanzee
ENSG00000021826	0.260355	Human-Chimpanzee
ENSG00000021852	0.342105	Human-Chimpanzee
ENSG00000022277	0.104247	Human-Chimpanzee
ENSG00000022567	0.0590551	Human-Chimpanzee
ENSG00000022840	0.238806	Human-Chimpanzee
ENSG00000022976	0.753165	Human-Chimpanzee
ENSG00000023171	0.217009	Human-Chimpanzee
ENSG00000023228	0.129032	Human-Chimpanzee
ENSG00000023287	0.238095	Human-Chimpanzee
ENSG00000023445	0.245833	Human-Chimpanzee
ENSG00000023516	0.662651	Human-Chimpanzee
ENSG00000023572	0.165644	Human-Chimpanzee
ENSG00000023608	0.807692	Human-Chimpanzee
ENSG00000023697	0.317241	Human-Chimpanzee
ENSG00000023734	0.0787879	Human-Chimpanzee
ENSG00000023839	0.59375	Human-Chimpanzee
ENSG00000023892	0.18018	Human-Chimpanzee
ENSG00000023902	0.255556	Human-Chimpanzee
ENSG00000024048	0.333333	Human-Chimpanzee
ENSG00000024862	0.441667	Human-Chimpanzee
ENSG00000025293	0.384615	Human-Chimpanzee
ENSG00000025708	0.202899	Human-Chimpanzee
ENSG00000025770	0.186957	Human-Chimpanzee
ENSG00000025796	0.16	Human-Chimpanzee
ENSG00000025800	0.690821	Human-Chimpanzee
ENSG00000026297	1.10811	Human-Chimpanzee
ENSG00000026508	0.549296	Human-Chimpanzee
ENSG00000026652	0.0330579	Human-Chimpanzee
ENSG00000026751	0.431373	Human-Chimpanzee
ENSG00000026950	0.501799	Human-Chimpanzee
ENSG00000027001	0.363104	Human-Chimpanzee
ENSG00000027075	0.0666667	Human-Chimpanzee
ENSG00000027644	0.0980392	Human-Chimpanzee
ENSG00000027697	0.193878	Human-Chimpanzee
ENSG00000027869	0.708333	Human-Chimpanzee
ENSG00000028137	0.0953947	Human-Chimpanzee
ENSG00000028203	0.833333	Human-Chimpanzee
ENSG00000028277	0.604294	Human-Chimpanzee
ENSG00000028528	0.346535	Human-Chimpanzee
ENSG00000029153	0.229508	Human-Chimpanzee
ENSG00000029363	0.0446429	Human-Chimpanzee
ENSG00000029534	0.0416667	Human-Chimpanzee
ENSG00000029559	0.414729	Human-Chimpanzee
ENSG00000029639	0.106061	Human-Chimpanzee
ENSG00000029725	0.44898	Human-Chimpanzee
ENSG00000030066	0.435897	Human-Chimpanzee
ENSG00000030110	0.151899	Human-Chimpanzee
ENSG00000030304	0.2	Human-Chimpanzee
ENSG00000030582	0.454545	Human-Chimpanzee
ENSG00000031003	0.280702	Human-Chimpanzee
ENSG00000031081	0.564815	Human-Chimpanzee
ENSG00000031691	0.842409	Human-Chimpanzee
ENSG00000031698	0.473684	Human-Chimpanzee
ENSG00000031823	0.525	Human-Chimpanzee
ENSG00000032219	0.340426	Human-Chimpanzee
ENSG00000032389	0.223602	Human-Chimpanzee
ENSG00000032444	0.0350195	Human-Chimpanzee
ENSG00000032742	0.0340136	Human-Chimpanzee
ENSG00000033011	0.200837	Human-Chimpanzee
ENSG00000033030	0.835165	Human-Chimpanzee
ENSG00000033122	0.09375	Human-Chimpanzee
ENSG00000033178	0.244186	Human-Chimpanzee
ENSG00000033327	0.0391061	Human-Chimpanzee
ENSG00000033627	0.0566038	Human-Chimpanzee
ENSG00000033800	0.129032	Human-Chimpanzee
ENSG00000033867	0.197368	Human-Chimpanzee
ENSG00000034053	0.275142	Human-Chimpanzee
ENSG00000034152	0.236584	Human-Chimpanzee
ENSG00000034239	0.142857	Human-Chimpanzee
ENSG00000034533	0.205128	Human-Chimpanzee
ENSG00000034971	0.26	Human-Chimpanzee
ENSG00000035115	0.0853659	Human-Chimpanzee
ENSG00000035499	0.459459	Human-Chimpanzee
ENSG00000035664	0.0654545	Human-Chimpanzee
ENSG00000035681	0.12987	Human-Chimpanzee
ENSG00000035720	0.0838323	Human-Chimpanzee
ENSG00000035928	0.362319	Human-Chimpanzee
ENSG00000036054	0.378753	Human-Chimpanzee
ENSG00000036448	0.249012	Human-Chimpanzee
ENSG00000036549	0.411765	Human-Chimpanzee
ENSG00000036565	0.229452	Human-Chimpanzee
ENSG00000036672	0.311927	Human-Chimpanzee
ENSG00000036828	0.117155	Human-Chimpanzee
ENSG00000037280	0.0822581	Human-Chimpanzee
ENSG00000037474	0.109434	Human-Chimpanzee
ENSG00000037637	0.451613	Human-Chimpanzee
ENSG00000037749	0.164706	Human-Chimpanzee
ENSG00000037757	0.313725	Human-Chimpanzee
ENSG00000037897	0.528302	Human-Chimpanzee
ENSG00000037965	0.22973	Human-Chimpanzee
ENSG00000038002	0.145161	Human-Chimpanzee
ENSG00000038210	0.256098	Human-Chimpanzee
ENSG00000038295	0.0391304	Human-Chimpanzee
ENSG00000038358	0.0869565	Human-Chimpanzee
ENSG00000038382	0.025641	Human-Chimpanzee
ENSG00000038532	0.111111	Human-Chimpanzee
ENSG00000039068	0.171521	Human-Chimpanzee
ENSG00000039123	0.150943	Human-Chimpanzee
ENSG00000039139	0.232394	Human-Chimpanzee
ENSG00000039319	0.646018	Human-Chimpanzee
ENSG00000039523	0.454054	Human-Chimpanzee
ENSG00000039537	0.607143	Human-Chimpanzee
ENSG00000039560	0.282869	Human-Chimpanzee
ENSG00000039600	0.638554	Human-Chimpanzee
ENSG00000039987	0.0361446	Human-Chimpanzee
ENSG00000040199	0.649123	Human-Chimpanzee
ENSG00000040275	0.372549	Human-Chimpanzee
ENSG00000040341	1.46809	Human-Chimpanzee
ENSG00000040487	0.244444	Human-Chimpanzee
ENSG00000040531	0.221344	Human-Chimpanzee
ENSG00000040608	0.197561	Human-Chimpanzee
ENSG00000040933	0.0510204	Human-Chimpanzee
ENSG00000041515	0.32	Human-Chimpanzee
ENSG00000041802	0.75	Human-Chimpanzee
ENSG00000041880	1.88679	Human-Chimpanzee
ENSG00000041982	0.208333	Human-Chimpanzee
ENSG00000041988	0.343373	Human-Chimpanzee
ENSG00000042062	0.241706	Human-Chimpanzee
ENSG00000042088	0.490196	Human-Chimpanzee
ENSG00000042286	0.135036	Human-Chimpanzee
ENSG00000042317	2.73684	Human-Chimpanzee
ENSG00000042445	0.549467	Human-Chimpanzee
ENSG00000042781	0.54955	Human-Chimpanzee
ENSG00000042813	0.272251	Human-Chimpanzee
ENSG00000042832	0.532258	Human-Chimpanzee
ENSG00000042980	0.466102	Human-Chimpanzee
ENSG00000043143	0.126761	Human-Chimpanzee
ENSG00000043355	0.0707547	Human-Chimpanzee
ENSG00000043462	0.121622	Human-Chimpanzee
ENSG00000043514	0.1375	Human-Chimpanzee
ENSG00000043591	0.106267	Human-Chimpanzee
ENSG00000044012	0.677419	Human-Chimpanzee
ENSG00000044090	0.172414	Human-Chimpanzee
ENSG00000044115	0.0337838	Human-Chimpanzee
ENSG00000044446	0.294118	Human-Chimpanzee
ENSG00000044459	0.5	Human-Chimpanzee
ENSG00000044524	0.106383	Human-Chimpanzee
ENSG00000046604	0.309211	Human-Chimpanzee
ENSG00000046647	0.525687	Human-Chimpanzee
ENSG00000046651	0.431034	Human-Chimpanzee
ENSG00000046653	0.737097	Human-Chimpanzee
ENSG00000046889	0.394958	Human-Chimpanzee
ENSG00000047056	0.140625	Human-Chimpanzee
ENSG00000047188	0.157895	Human-Chimpanzee
ENSG00000047346	0.176829	Human-Chimpanzee
ENSG00000047365	0.477778	Human-Chimpanzee
ENSG00000047410	0.111111	Human-Chimpanzee
ENSG00000047457	0.460432	Human-Chimpanzee
ENSG00000047578	0.365385	Human-Chimpanzee
ENSG00000047579	0.242604	Human-Chimpanzee
ENSG00000047617	0.237569	Human-Chimpanzee
ENSG00000047621	0.0695652	Human-Chimpanzee
ENSG00000047644	0.104478	Human-Chimpanzee
ENSG00000047648	0.4	Human-Chimpanzee
ENSG00000047662	0.356223	Human-Chimpanzee
ENSG00000047932	0.389831	Human-Chimpanzee
ENSG00000047936	0.377358	Human-Chimpanzee
ENSG00000048028	0.140351	Human-Chimpanzee
ENSG00000048052	0.216867	Human-Chimpanzee
ENSG00000048140	0.0520446	Human-Chimpanzee
ENSG00000048342	0.432836	Human-Chimpanzee
ENSG00000048392	0.586207	Human-Chimpanzee
ENSG00000048471	0.310345	Human-Chimpanzee
ENSG00000048540	0.690323	Human-Chimpanzee
ENSG00000048544	0.305556	Human-Chimpanzee
ENSG00000048649	0.377358	Human-Chimpanzee
ENSG00000048707	0.213483	Human-Chimpanzee
ENSG00000048740	0.09	Human-Chimpanzee
ENSG00000048828	0.461883	Human-Chimpanzee
ENSG00000048991	0.42723	Human-Chimpanzee
ENSG00000049089	0.522936	Human-Chimpanzee
ENSG00000049192	0.0425532	Human-Chimpanzee
ENSG00000049239	0.198413	Human-Chimpanzee
ENSG00000049246	0.533333	Human-Chimpanzee
ENSG00000049249	0.445312	Human-Chimpanzee
ENSG00000049283	0.17	Human-Chimpanzee
ENSG00000049323	0.319328	Human-Chimpanzee
ENSG00000049540	0.625	Human-Chimpanzee
ENSG00000049618	0.0595238	Human-Chimpanzee
ENSG00000049759	0.722345	Human-Chimpanzee
ENSG00000049768	0.253731	Human-Chimpanzee
ENSG00000049860	0.859107	Human-Chimpanzee
ENSG00000049883	0.6	Human-Chimpanzee
ENSG00000050030	0.097561	Human-Chimpanzee
ENSG00000050130	0.807175	Human-Chimpanzee
ENSG00000050165	0.484277	Human-Chimpanzee
ENSG00000050327	0.472222	Human-Chimpanzee
ENSG00000050344	0.598592	Human-Chimpanzee
ENSG00000050393	0.942029	Human-Chimpanzee
ENSG00000050405	0.598253	Human-Chimpanzee
ENSG00000050426	0.517413	Human-Chimpanzee
ENSG00000050438	0.0952381	Human-Chimpanzee
ENSG00000050555	0.265957	Human-Chimpanzee
ENSG00000050628	0.287671	Human-Chimpanzee
ENSG00000050730	0.329545	Human-Chimpanzee
ENSG00000050820	0.1	Human-Chimpanzee
ENSG00000051009	0.367647	Human-Chimpanzee
ENSG00000051128	0.236111	Human-Chimpanzee
ENSG00000051180	0.5	Human-Chimpanzee
ENSG00000051341	0.398305	Human-Chimpanzee
ENSG00000051382	0.0892857	Human-Chimpanzee
ENSG00000051523	0.339762	Human-Chimpanzee
ENSG00000051620	0.810345	Human-Chimpanzee
ENSG00000051825	0.805556	Human-Chimpanzee
ENSG00000052126	0.45	Human-Chimpanzee
ENSG00000052344	0.40795	Human-Chimpanzee
ENSG00000052749	0.481973	Human-Chimpanzee
ENSG00000052795	0.451613	Human-Chimpanzee
ENSG00000052841	0.692308	Human-Chimpanzee
ENSG00000052850	0.15625	Human-Chimpanzee
ENSG00000053108	0.144068	Human-Chimpanzee
ENSG00000053254	0.056962	Human-Chimpanzee
ENSG00000053328	0.658824	Human-Chimpanzee
ENSG00000053371	0.253219	Human-Chimpanzee
ENSG00000053501	0.306338	Human-Chimpanzee
ENSG00000053524	0.448	Human-Chimpanzee
ENSG00000053747	0.344538	Human-Chimpanzee
ENSG00000053770	0.138889	Human-Chimpanzee
ENSG00000053900	0.146341	Human-Chimpanzee
ENSG00000053918	0.12	Human-Chimpanzee
ENSG00000054148	0.108504	Human-Chimpanzee
ENSG00000054179	0.290323	Human-Chimpanzee
ENSG00000054277	0.0846154	Human-Chimpanzee
ENSG00000054282	0.370079	Human-Chimpanzee
ENSG00000054356	0.175758	Human-Chimpanzee
ENSG00000054392	0.0436893	Human-Chimpanzee
ENSG00000054523	0.288043	Human-Chimpanzee
ENSG00000054598	0.0194444	Human-Chimpanzee
ENSG00000054611	0.198529	Human-Chimpanzee
ENSG00000054690	0.484848	Human-Chimpanzee
ENSG00000054793	0.382294	Human-Chimpanzee
ENSG00000054796	0.369748	Human-Chimpanzee
ENSG00000054967	0.52381	Human-Chimpanzee
ENSG00000054983	0.044586	Human-Chimpanzee
ENSG00000055044	0.397959	Human-Chimpanzee
ENSG00000055118	0.0308642	Human-Chimpanzee
ENSG00000055147	0.719298	Human-Chimpanzee
ENSG00000055208	0.0786517	Human-Chimpanzee
ENSG00000055211	0.181818	Human-Chimpanzee
ENSG00000055332	0.535433	Human-Chimpanzee
ENSG00000055483	0.456522	Human-Chimpanzee
ENSG00000055732	0.144928	Human-Chimpanzee
ENSG00000055813	0.167155	Human-Chimpanzee
ENSG00000055917	0.0649351	Human-Chimpanzee
ENSG00000055950	0.41572	Human-Chimpanzee
ENSG00000055957	0.340502	Human-Chimpanzee
ENSG00000056050	0.419355	Human-Chimpanzee
ENSG00000056097	0.0888889	Human-Chimpanzee
ENSG00000056277	1.42857	Human-Chimpanzee
ENSG00000056291	0.580952	Human-Chimpanzee
ENSG00000056487	0.126214	Human-Chimpanzee
ENSG00000056558	0.144828	Human-Chimpanzee
ENSG00000056586	0.212766	Human-Chimpanzee
ENSG00000056736	0.838384	Human-Chimpanzee
ENSG00000056972	0.494382	Human-Chimpanzee
ENSG00000056998	0.351852	Human-Chimpanzee
ENSG00000057019	0.113208	Human-Chimpanzee
ENSG00000057294	0.27381	Human-Chimpanzee
ENSG00000057468	0.23	Human-Chimpanzee
ENSG00000057608	0.0759494	Human-Chimpanzee
ENSG00000057657	0.755556	Human-Chimpanzee
ENSG00000057704	0.048913	Human-Chimpanzee
ENSG00000057757	0.0628743	Human-Chimpanzee
ENSG00000058056	0.153846	Human-Chimpanzee
ENSG00000058063	0.0350877	Human-Chimpanzee
ENSG00000058085	0.535714	Human-Chimpanzee
ENSG00000058091	0.3	Human-Chimpanzee
ENSG00000058262	0.21134	Human-Chimpanzee
ENSG00000058272	0.0625	Human-Chimpanzee
ENSG00000058335	0.103774	Human-Chimpanzee
ENSG00000058453	0.112861	Human-Chimpanzee
ENSG00000058600	0.08	Human-Chimpanzee
ENSG00000058668	0.0322581	Human-Chimpanzee
ENSG00000058729	0.220721	Human-Chimpanzee
ENSG00000058799	0.512195	Human-Chimpanzee
ENSG00000058804	0.655172	Human-Chimpanzee
ENSG00000058866	0.3125	Human-Chimpanzee
ENSG00000059122	0.188073	Human-Chimpanzee
ENSG00000059377	0.484127	Human-Chimpanzee
ENSG00000059378	0.137168	Human-Chimpanzee
ENSG00000059588	0.341615	Human-Chimpanzee
ENSG00000059691	0.692308	Human-Chimpanzee
ENSG00000059758	0.326923	Human-Chimpanzee
ENSG00000059769	0.208333	Human-Chimpanzee
ENSG00000059804	0.195946	Human-Chimpanzee
ENSG00000059915	0.126761	Human-Chimpanzee
ENSG00000060069	0.305556	Human-Chimpanzee
ENSG00000060140	0.306306	Human-Chimpanzee
ENSG00000060237	0.322581	Human-Chimpanzee
ENSG00000060339	0.0254777	Human-Chimpanzee
ENSG00000060491	0.382749	Human-Chimpanzee
ENSG00000060566	0.279817	Human-Chimpanzee
ENSG00000060642	1.6	Human-Chimpanzee
ENSG00000060656	0.188976	Human-Chimpanzee
ENSG00000060709	0.157738	Human-Chimpanzee
ENSG00000060718	0.477848	Human-Chimpanzee
ENSG00000060749	0.349398	Human-Chimpanzee
ENSG00000060762	0.711382	Human-Chimpanzee
ENSG00000060982	0.265306	Human-Chimpanzee
ENSG00000061273	0.758929	Human-Chimpanzee
ENSG00000061337	0.0325815	Human-Chimpanzee
ENSG00000061455	0.0267176	Human-Chimpanzee
ENSG00000061492	0.150943	Human-Chimpanzee
ENSG00000061794	0.168582	Human-Chimpanzee
ENSG00000061918	0.735135	Human-Chimpanzee
ENSG00000061936	0.633803	Human-Chimpanzee
ENSG00000061938	0.0418118	Human-Chimpanzee
ENSG00000061987	0.097561	Human-Chimpanzee
ENSG00000062038	0.123188	Human-Chimpanzee
ENSG00000062194	0.151515	Human-Chimpanzee
ENSG00000062485	0.105769	Human-Chimpanzee
ENSG00000062524	0.172043	Human-Chimpanzee
ENSG00000062650	0.0956522	Human-Chimpanzee
ENSG00000062716	0.823789	Human-Chimpanzee
ENSG00000062822	0.032646	Human-Chimpanzee
ENSG00000063015	0.891892	Human-Chimpanzee
ENSG00000063241	0.365546	Human-Chimpanzee
ENSG00000063245	0.276699	Human-Chimpanzee
ENSG00000063322	0.343066	Human-Chimpanzee
ENSG00000063515	0.199357	Human-Chimpanzee
ENSG00000063601	0.184211	Human-Chimpanzee
ENSG00000063660	0.0666667	Human-Chimpanzee
ENSG00000063761	0.057047	Human-Chimpanzee
ENSG00000063854	0.287879	Human-Chimpanzee
ENSG00000064012	0.165049	Human-Chimpanzee
ENSG00000064042	0.5	Human-Chimpanzee
ENSG00000064115	0.38	Human-Chimpanzee
ENSG00000064201	0.757143	Human-Chimpanzee
ENSG00000064205	0.0918919	Human-Chimpanzee
ENSG00000064218	0.415888	Human-Chimpanzee
ENSG00000064225	0.328947	Human-Chimpanzee
ENSG00000064270	0.266355	Human-Chimpanzee
ENSG00000064309	0.488764	Human-Chimpanzee
ENSG00000064313	0.307692	Human-Chimpanzee
ENSG00000064393	0.0490798	Human-Chimpanzee
ENSG00000064490	0.0977011	Human-Chimpanzee
ENSG00000064545	0.22093	Human-Chimpanzee
ENSG00000064547	0.0545455	Human-Chimpanzee
ENSG00000064601	0.272374	Human-Chimpanzee
ENSG00000064607	0.551724	Human-Chimpanzee
ENSG00000064651	0.146154	Human-Chimpanzee
ENSG00000064655	0.252475	Human-Chimpanzee
ENSG00000064687	0.176871	Human-Chimpanzee
ENSG00000064692	0.28866	Human-Chimpanzee
ENSG00000064703	0.514851	Human-Chimpanzee
ENSG00000064726	0.278107	Human-Chimpanzee
ENSG00000064763	0.25974	Human-Chimpanzee
ENSG00000064787	0.139394	Human-Chimpanzee
ENSG00000064886	0.39627	Human-Chimpanzee
ENSG00000064932	0.282686	Human-Chimpanzee
ENSG00000064933	0.655172	Human-Chimpanzee
ENSG00000064989	0.652291	Human-Chimpanzee
ENSG00000064999	0.190789	Human-Chimpanzee
ENSG00000065000	0.0348525	Human-Chimpanzee
ENSG00000065054	0.460432	Human-Chimpanzee
ENSG00000065057	0.150877	Human-Chimpanzee
ENSG00000065060	0.333333	Human-Chimpanzee
ENSG00000065150	0.0724638	Human-Chimpanzee
ENSG00000065183	0.196581	Human-Chimpanzee
ENSG00000065243	0.213115	Human-Chimpanzee
ENSG00000065268	0.0332147	Human-Chimpanzee
ENSG00000065308	0.25	Human-Chimpanzee
ENSG00000065325	0.155963	Human-Chimpanzee
ENSG00000065328	0.241379	Human-Chimpanzee
ENSG00000065357	0.436224	Human-Chimpanzee
ENSG00000065361	0.415584	Human-Chimpanzee
ENSG00000065371	0.475248	Human-Chimpanzee
ENSG00000065413	0.428571	Human-Chimpanzee
ENSG00000065427	0.461538	Human-Chimpanzee
ENSG00000065457	0.178218	Human-Chimpanzee
ENSG00000065485	0.264151	Human-Chimpanzee
ENSG00000065491	0.61413	Human-Chimpanzee
ENSG00000065526	0.209091	Human-Chimpanzee
ENSG00000065534	0.462025	Human-Chimpanzee
ENSG00000065548	0.227273	Human-Chimpanzee
ENSG00000065600	0.389262	Human-Chimpanzee
ENSG00000065609	0.15534	Human-Chimpanzee
ENSG00000065613	0.380952	Human-Chimpanzee
ENSG00000065618	0.445378	Human-Chimpanzee
ENSG00000065665	0.0777385	Human-Chimpanzee
ENSG00000065675	0.100775	Human-Chimpanzee
ENSG00000065717	0.203125	Human-Chimpanzee
ENSG00000065802	0.302985	Human-Chimpanzee
ENSG00000065809	0.235294	Human-Chimpanzee
ENSG00000065833	0.294118	Human-Chimpanzee
ENSG00000065882	0.666667	Human-Chimpanzee
ENSG00000065883	0.188679	Human-Chimpanzee
ENSG00000065911	0.114754	Human-Chimpanzee
ENSG00000065923	0.405405	Human-Chimpanzee
ENSG00000065970	1.44444	Human-Chimpanzee
ENSG00000065978	0.938511	Human-Chimpanzee
ENSG00000065989	0.236111	Human-Chimpanzee
ENSG00000066056	0.135593	Human-Chimpanzee
ENSG00000066084	0.353909	Human-Chimpanzee
ENSG00000066136	0.196721	Human-Chimpanzee
ENSG00000066185	0.322581	Human-Chimpanzee
ENSG00000066230	0.047619	Human-Chimpanzee
ENSG00000066248	0.162304	Human-Chimpanzee
ENSG00000066279	0.733333	Human-Chimpanzee
ENSG00000066294	1.34375	Human-Chimpanzee
ENSG00000066322	0.412607	Human-Chimpanzee
ENSG00000066405	0.189068	Human-Chimpanzee
ENSG00000066427	0.224215	Human-Chimpanzee
ENSG00000066455	0.585259	Human-Chimpanzee
ENSG00000066468	0.0545455	Human-Chimpanzee
ENSG00000066557	0.27381	Human-Chimpanzee
ENSG00000066629	0.130435	Human-Chimpanzee
ENSG00000066651	0.0892857	Human-Chimpanzee
ENSG00000066654	0.534247	Human-Chimpanzee
ENSG00000066735	0.282609	Human-Chimpanzee
ENSG00000066739	0.413223	Human-Chimpanzee
ENSG00000066777	0.0980392	Human-Chimpanzee
ENSG00000066813	0.611111	Human-Chimpanzee
ENSG00000066827	0.254902	Human-Chimpanzee
ENSG00000066855	1.51351	Human-Chimpanzee
ENSG00000066923	0.608696	Human-Chimpanzee
ENSG00000066926	0.365385	Human-Chimpanzee
ENSG00000066933	0.27957	Human-Chimpanzee
ENSG00000067057	0.0318352	Human-Chimpanzee
ENSG00000067064	0.38806	Human-Chimpanzee
ENSG00000067113	0.333333	Human-Chimpanzee
ENSG00000067141	0.13	Human-Chimpanzee
ENSG00000067167	0.0591133	Human-Chimpanzee
ENSG00000067177	0.453083	Human-Chimpanzee
ENSG00000067182	0.243478	Human-Chimpanzee
ENSG00000067191	0.429461	Human-Chimpanzee
ENSG00000067208	0.367347	Human-Chimpanzee
ENSG00000067221	0.135458	Human-Chimpanzee
ENSG00000067248	0.269231	Human-Chimpanzee
ENSG00000067334	0.106195	Human-Chimpanzee
ENSG00000067365	0.131234	Human-Chimpanzee
ENSG00000067369	0.564516	Human-Chimpanzee
ENSG00000067533	1.97222	Human-Chimpanzee
ENSG00000067606	0.190265	Human-Chimpanzee
ENSG00000067704	0.0873786	Human-Chimpanzee
ENSG00000067798	0.113043	Human-Chimpanzee
ENSG00000067829	0.160976	Human-Chimpanzee
ENSG00000067836	0.497354	Human-Chimpanzee
ENSG00000067840	0.357143	Human-Chimpanzee
ENSG00000067900	0.122905	Human-Chimpanzee
ENSG00000067955	1.08272	Human-Chimpanzee
ENSG00000067992	0.506667	Human-Chimpanzee
ENSG00000068001	0.0947867	Human-Chimpanzee
ENSG00000068024	0.183746	Human-Chimpanzee
ENSG00000068028	0.146067	Human-Chimpanzee
ENSG00000068078	0.0227273	Human-Chimpanzee
ENSG00000068120	0.161458	Human-Chimpanzee
ENSG00000068137	0.326923	Human-Chimpanzee
ENSG00000068305	0.393372	Human-Chimpanzee
ENSG00000068308	0.0523256	Human-Chimpanzee
ENSG00000068323	0.723214	Human-Chimpanzee
ENSG00000068354	0.308511	Human-Chimpanzee
ENSG00000068366	0.293706	Human-Chimpanzee
ENSG00000068383	0.422905	Human-Chimpanzee
ENSG00000068394	0.859155	Human-Chimpanzee
ENSG00000068400	0.49026	Human-Chimpanzee
ENSG00000068489	0.369128	Human-Chimpanzee
ENSG00000068615	0.873715	Human-Chimpanzee
ENSG00000068650	0.289888	Human-Chimpanzee
ENSG00000068654	0.42735	Human-Chimpanzee
ENSG00000068724	0.204082	Human-Chimpanzee
ENSG00000068784	0.345324	Human-Chimpanzee
ENSG00000068796	0.12	Human-Chimpanzee
ENSG00000068831	0.0588235	Human-Chimpanzee
ENSG00000068878	0.351648	Human-Chimpanzee
ENSG00000068885	0.227545	Human-Chimpanzee
ENSG00000068912	0.0714286	Human-Chimpanzee
ENSG00000068971	0.253333	Human-Chimpanzee
ENSG00000068976	0.0316456	Human-Chimpanzee
ENSG00000069018	0.0322581	Human-Chimpanzee
ENSG00000069020	0.494949	Human-Chimpanzee
ENSG00000069122	0.302752	Human-Chimpanzee
ENSG00000069188	0.0369231	Human-Chimpanzee
ENSG00000069248	0.481013	Human-Chimpanzee
ENSG00000069399	0.59375	Human-Chimpanzee
ENSG00000069431	0.0375	Human-Chimpanzee
ENSG00000069482	0.0725806	Human-Chimpanzee
ENSG00000069535	0.0412844	Human-Chimpanzee
ENSG00000069667	0.216216	Human-Chimpanzee
ENSG00000069696	0.229703	Human-Chimpanzee
ENSG00000069702	0.186813	Human-Chimpanzee
ENSG00000069869	0.389474	Human-Chimpanzee
ENSG00000069943	0.373134	Human-Chimpanzee
ENSG00000069966	0.167273	Human-Chimpanzee
ENSG00000069974	1.5	Human-Chimpanzee
ENSG00000069998	0.130435	Human-Chimpanzee
ENSG00000070010	0.161111	Human-Chimpanzee
ENSG00000070018	0.168831	Human-Chimpanzee
ENSG00000070019	0.319149	Human-Chimpanzee
ENSG00000070031	0.283465	Human-Chimpanzee
ENSG00000070047	0.258242	Human-Chimpanzee
ENSG00000070061	0.454545	Human-Chimpanzee
ENSG00000070087	0.223171	Human-Chimpanzee
ENSG00000070159	0.234234	Human-Chimpanzee
ENSG00000070214	0.461538	Human-Chimpanzee
ENSG00000070269	0.203593	Human-Chimpanzee
ENSG00000070366	0.373832	Human-Chimpanzee
ENSG00000070367	0.142222	Human-Chimpanzee
ENSG00000070371	0.487725	Human-Chimpanzee
ENSG00000070388	0.0703364	Human-Chimpanzee
ENSG00000070404	0.114504	Human-Chimpanzee
ENSG00000070413	0.112676	Human-Chimpanzee
ENSG00000070444	0.40107	Human-Chimpanzee
ENSG00000070476	0.212598	Human-Chimpanzee
ENSG00000070495	0.3083	Human-Chimpanzee
ENSG00000070526	0.291971	Human-Chimpanzee
ENSG00000070540	0.0764331	Human-Chimpanzee
ENSG00000070601	0.628571	Human-Chimpanzee
ENSG00000070610	0.480769	Human-Chimpanzee
ENSG00000070614	0.0357143	Human-Chimpanzee
ENSG00000070731	0.331906	Human-Chimpanzee
ENSG00000070748	0.538462	Human-Chimpanzee
ENSG00000070759	0.185567	Human-Chimpanzee
ENSG00000070778	0.211765	Human-Chimpanzee
ENSG00000070785	0.1875	Human-Chimpanzee
ENSG00000070814	0.376289	Human-Chimpanzee
ENSG00000070882	0.556901	Human-Chimpanzee
ENSG00000070886	0.178474	Human-Chimpanzee
ENSG00000070915	0.162896	Human-Chimpanzee
ENSG00000070950	0.493333	Human-Chimpanzee
ENSG00000070985	0.178707	Human-Chimpanzee
ENSG00000071054	0.423256	Human-Chimpanzee
ENSG00000071082	2.19792	Human-Chimpanzee
ENSG00000071127	0.06	Human-Chimpanzee
ENSG00000071189	0.150538	Human-Chimpanzee
ENSG00000071203	100.5	Human-Chimpanzee
ENSG00000071205	0.159292	Human-Chimpanzee
ENSG00000071242	0.0866426	Human-Chimpanzee
ENSG00000071246	0.12963	Human-Chimpanzee
ENSG00000071282	0.0988142	Human-Chimpanzee
ENSG00000071537	0.0487805	Human-Chimpanzee
ENSG00000071553	0.197279	Human-Chimpanzee
ENSG00000071564	0.262088	Human-Chimpanzee
ENSG00000071626	0.565789	Human-Chimpanzee
ENSG00000071794	0.239437	Human-Chimpanzee
ENSG00000071909	0.460784	Human-Chimpanzee
ENSG00000071991	0.372549	Human-Chimpanzee
ENSG00000071994	0.744395	Human-Chimpanzee
ENSG00000072041	0.0638298	Human-Chimpanzee
ENSG00000072042	0.177914	Human-Chimpanzee
ENSG00000072071	0.280564	Human-Chimpanzee
ENSG00000072110	0.269149	Human-Chimpanzee
ENSG00000072121	0.490323	Human-Chimpanzee
ENSG00000072133	0.606796	Human-Chimpanzee
ENSG00000072134	0.0912863	Human-Chimpanzee
ENSG00000072163	0.0634441	Human-Chimpanzee
ENSG00000072182	0.254658	Human-Chimpanzee
ENSG00000072195	0.201149	Human-Chimpanzee
ENSG00000072201	0.12069	Human-Chimpanzee
ENSG00000072210	0.485437	Human-Chimpanzee
ENSG00000072274	0.882353	Human-Chimpanzee
ENSG00000072310	0.333333	Human-Chimpanzee
ENSG00000072422	0.176871	Human-Chimpanzee
ENSG00000072571	0.67	Human-Chimpanzee
ENSG00000072609	0.198198	Human-Chimpanzee
ENSG00000072657	0.0917431	Human-Chimpanzee
ENSG00000072682	0.157895	Human-Chimpanzee
ENSG00000072736	0.277778	Human-Chimpanzee
ENSG00000072786	0.179167	Human-Chimpanzee
ENSG00000072803	0.0857143	Human-Chimpanzee
ENSG00000072818	0.141176	Human-Chimpanzee
ENSG00000072832	0.177305	Human-Chimpanzee
ENSG00000072840	0.219178	Human-Chimpanzee
ENSG00000072864	0.333333	Human-Chimpanzee
ENSG00000072952	0.430233	Human-Chimpanzee
ENSG00000073050	0.3375	Human-Chimpanzee
ENSG00000073060	0.250963	Human-Chimpanzee
ENSG00000073067	0.123214	Human-Chimpanzee
ENSG00000073146	0.8	Human-Chimpanzee
ENSG00000073150	0.0507463	Human-Chimpanzee
ENSG00000073169	0.114286	Human-Chimpanzee
ENSG00000073331	0.923077	Human-Chimpanzee
ENSG00000073350	0.244681	Human-Chimpanzee
ENSG00000073417	0.181818	Human-Chimpanzee
ENSG00000073536	0.266055	Human-Chimpanzee
ENSG00000073598	0.217391	Human-Chimpanzee
ENSG00000073605	1.07407	Human-Chimpanzee
ENSG00000073614	0.207792	Human-Chimpanzee
ENSG00000073670	0.26455	Human-Chimpanzee
ENSG00000073711	0.411765	Human-Chimpanzee
ENSG00000073734	0.170103	Human-Chimpanzee
ENSG00000073737	0.963636	Human-Chimpanzee
ENSG00000073754	0.465278	Human-Chimpanzee
ENSG00000073756	0.149533	Human-Chimpanzee
ENSG00000073792	0.235294	Human-Chimpanzee
ENSG00000073803	0.222749	Human-Chimpanzee
ENSG00000073849	0.0847458	Human-Chimpanzee
ENSG00000073910	0.0409836	Human-Chimpanzee
ENSG00000073921	0.184211	Human-Chimpanzee
ENSG00000074047	0.117166	Human-Chimpanzee
ENSG00000074054	0.47561	Human-Chimpanzee
ENSG00000074071	0.0681818	Human-Chimpanzee
ENSG00000074211	0.191898	Human-Chimpanzee
ENSG00000074276	0.18593	Human-Chimpanzee
ENSG00000074319	0.660539	Human-Chimpanzee
ENSG00000074356	0.0733945	Human-Chimpanzee
ENSG00000074370	0.104167	Human-Chimpanzee
ENSG00000074410	0.0687831	Human-Chimpanzee
ENSG00000074527	0.320513	Human-Chimpanzee
ENSG00000074590	0.104478	Human-Chimpanzee
ENSG00000074621	0.481481	Human-Chimpanzee
ENSG00000074660	0.27027	Human-Chimpanzee
ENSG00000074695	0.173709	Human-Chimpanzee
ENSG00000074706	0.293706	Human-Chimpanzee
ENSG00000074755	0.192308	Human-Chimpanzee
ENSG00000074771	0.276042	Human-Chimpanzee
ENSG00000074803	0.223502	Human-Chimpanzee
ENSG00000074935	0.0927835	Human-Chimpanzee
ENSG00000074964	0.15735	Human-Chimpanzee
ENSG00000075035	0.0425532	Human-Chimpanzee
ENSG00000075043	0.0116009	Human-Chimpanzee
ENSG00000075073	0.248344	Human-Chimpanzee
ENSG00000075131	0.777778	Human-Chimpanzee
ENSG00000075151	0.243243	Human-Chimpanzee
ENSG00000075213	0.0550459	Human-Chimpanzee
ENSG00000075218	1.43023	Human-Chimpanzee
ENSG00000075223	0.0744681	Human-Chimpanzee
ENSG00000075234	0.951807	Human-Chimpanzee
ENSG00000075240	0.332651	Human-Chimpanzee
ENSG00000075275	0.225806	Human-Chimpanzee
ENSG00000075290	0.141176	Human-Chimpanzee
ENSG00000075292	0.529412	Human-Chimpanzee
ENSG00000075336	0.318584	Human-Chimpanzee
ENSG00000075340	0.0540541	Human-Chimpanzee
ENSG00000075388	0.371429	Human-Chimpanzee
ENSG00000075391	0.0769231	Human-Chimpanzee
ENSG00000075399	0.207101	Human-Chimpanzee
ENSG00000075407	0.201613	Human-Chimpanzee
ENSG00000075413	0.132653	Human-Chimpanzee
ENSG00000075420	0.258065	Human-Chimpanzee
ENSG00000075539	0.134328	Human-Chimpanzee
ENSG00000075568	0.276316	Human-Chimpanzee
ENSG00000075643	0.409524	Human-Chimpanzee
ENSG00000075651	0.0670103	Human-Chimpanzee
ENSG00000075673	0.12426	Human-Chimpanzee
ENSG00000075711	0.0862069	Human-Chimpanzee
ENSG00000075790	0.373239	Human-Chimpanzee
ENSG00000075826	0.695238	Human-Chimpanzee
ENSG00000075856	0.0833333	Human-Chimpanzee
ENSG00000075884	0.273973	Human-Chimpanzee
ENSG00000075886	0.0438596	Human-Chimpanzee
ENSG00000075891	0.392558	Human-Chimpanzee
ENSG00000075914	0.184615	Human-Chimpanzee
ENSG00000075975	0.42602	Human-Chimpanzee
ENSG00000076053	0.142857	Human-Chimpanzee
ENSG00000076067	0.0866142	Human-Chimpanzee
ENSG00000076108	0.188406	Human-Chimpanzee
ENSG00000076201	0.237705	Human-Chimpanzee
ENSG00000076242	0.552632	Human-Chimpanzee
ENSG00000076258	0.272727	Human-Chimpanzee
ENSG00000076344	0.296703	Human-Chimpanzee
ENSG00000076351	0.0884956	Human-Chimpanzee
ENSG00000076356	0.0292398	Human-Chimpanzee
ENSG00000076382	1.33871	Human-Chimpanzee
ENSG00000076555	0.11828	Human-Chimpanzee
ENSG00000076641	0.52	Human-Chimpanzee
ENSG00000076650	0.479675	Human-Chimpanzee
ENSG00000076662	0.759124	Human-Chimpanzee
ENSG00000076685	0.394336	Human-Chimpanzee
ENSG00000076706	0.284553	Human-Chimpanzee
ENSG00000076770	0.381579	Human-Chimpanzee
ENSG00000076864	0.432341	Human-Chimpanzee
ENSG00000076984	0.0217391	Human-Chimpanzee
ENSG00000077044	0.384937	Human-Chimpanzee
ENSG00000077063	0.521739	Human-Chimpanzee
ENSG00000077097	0.0410959	Human-Chimpanzee
ENSG00000077150	0.0852713	Human-Chimpanzee
ENSG00000077157	0.266667	Human-Chimpanzee
ENSG00000077232	0.178082	Human-Chimpanzee
ENSG00000077235	0.138889	Human-Chimpanzee
ENSG00000077238	0.245059	Human-Chimpanzee
ENSG00000077254	0.101562	Human-Chimpanzee
ENSG00000077264	0.0683761	Human-Chimpanzee
ENSG00000077274	0.28125	Human-Chimpanzee
ENSG00000077279	0.438406	Human-Chimpanzee
ENSG00000077312	0.16	Human-Chimpanzee
ENSG00000077327	0.743333	Human-Chimpanzee
ENSG00000077348	0.28436	Human-Chimpanzee
ENSG00000077380	0.393443	Human-Chimpanzee
ENSG00000077420	0.715789	Human-Chimpanzee
ENSG00000077458	0.152941	Human-Chimpanzee
ENSG00000077463	0.0749186	Human-Chimpanzee
ENSG00000077498	0.211765	Human-Chimpanzee
ENSG00000077514	0.50463	Human-Chimpanzee
ENSG00000077522	0.0673759	Human-Chimpanzee
ENSG00000077549	0.10241	Human-Chimpanzee
ENSG00000077616	0.0952381	Human-Chimpanzee
ENSG00000077713	0.823529	Human-Chimpanzee
ENSG00000077935	0.434211	Human-Chimpanzee
ENSG00000077942	0.396251	Human-Chimpanzee
ENSG00000077943	0.288	Human-Chimpanzee
ENSG00000077984	0.204013	Human-Chimpanzee
ENSG00000078018	0.509091	Human-Chimpanzee
ENSG00000078053	0.255172	Human-Chimpanzee
ENSG00000078070	0.452632	Human-Chimpanzee
ENSG00000078081	0.669811	Human-Chimpanzee
ENSG00000078114	0.504854	Human-Chimpanzee
ENSG00000078124	0.277778	Human-Chimpanzee
ENSG00000078142	0.133333	Human-Chimpanzee
ENSG00000078177	0.209302	Human-Chimpanzee
ENSG00000078237	1.31707	Human-Chimpanzee
ENSG00000078246	0.452632	Human-Chimpanzee
ENSG00000078269	0.258065	Human-Chimpanzee
ENSG00000078295	0.0666667	Human-Chimpanzee
ENSG00000078304	0.45202	Human-Chimpanzee
ENSG00000078328	0.630691	Human-Chimpanzee
ENSG00000078401	1.41007	Human-Chimpanzee
ENSG00000078403	0.136364	Human-Chimpanzee
ENSG00000078589	1.26471	Human-Chimpanzee
ENSG00000078618	0.057971	Human-Chimpanzee
ENSG00000078674	0.478873	Human-Chimpanzee
ENSG00000078687	0.129412	Human-Chimpanzee
ENSG00000078747	0.12	Human-Chimpanzee
ENSG00000078795	0.5	Human-Chimpanzee
ENSG00000078804	0.9625	Human-Chimpanzee
ENSG00000078808	0.0337423	Human-Chimpanzee
ENSG00000078814	0.203036	Human-Chimpanzee
ENSG00000078898	0.27193	Human-Chimpanzee
ENSG00000078900	0.0221843	Human-Chimpanzee
ENSG00000078902	0.397527	Human-Chimpanzee
ENSG00000079101	1.04046	Human-Chimpanzee
ENSG00000079112	0.478261	Human-Chimpanzee
ENSG00000079134	0.111111	Human-Chimpanzee
ENSG00000079150	0.534884	Human-Chimpanzee
ENSG00000079156	0.148936	Human-Chimpanzee
ENSG00000079215	0.0857143	Human-Chimpanzee
ENSG00000079246	0.276596	Human-Chimpanzee
ENSG00000079257	0.271429	Human-Chimpanzee
ENSG00000079263	0.634921	Human-Chimpanzee
ENSG00000079277	0.204878	Human-Chimpanzee
ENSG00000079308	0.205479	Human-Chimpanzee
ENSG00000079313	0.323045	Human-Chimpanzee
ENSG00000079335	0.468165	Human-Chimpanzee
ENSG00000079337	0.227273	Human-Chimpanzee
ENSG00000079385	0.564417	Human-Chimpanzee
ENSG00000079387	1.54545	Human-Chimpanzee
ENSG00000079393	0.566667	Human-Chimpanzee
ENSG00000079432	0.235808	Human-Chimpanzee
ENSG00000079459	0.437068	Human-Chimpanzee
ENSG00000079482	0.791604	Human-Chimpanzee
ENSG00000079557	0.714286	Human-Chimpanzee
ENSG00000079616	0.261194	Human-Chimpanzee
ENSG00000079689	0.279412	Human-Chimpanzee
ENSG00000079691	0.1	Human-Chimpanzee
ENSG00000079739	0.273438	Human-Chimpanzee
ENSG00000079785	0.0408163	Human-Chimpanzee
ENSG00000079805	0.105911	Human-Chimpanzee
ENSG00000079819	0.185185	Human-Chimpanzee
ENSG00000079931	0.223022	Human-Chimpanzee
ENSG00000079950	0.178218	Human-Chimpanzee
ENSG00000080007	0.716667	Human-Chimpanzee
ENSG00000080031	0.729915	Human-Chimpanzee
ENSG00000080166	0.225225	Human-Chimpanzee
ENSG00000080189	0.0785714	Human-Chimpanzee
ENSG00000080200	1.04478	Human-Chimpanzee
ENSG00000080224	0.0740741	Human-Chimpanzee
ENSG00000080293	0.285714	Human-Chimpanzee
ENSG00000080298	0.666667	Human-Chimpanzee
ENSG00000080345	0.324786	Human-Chimpanzee
ENSG00000080493	0.27551	Human-Chimpanzee
ENSG00000080503	0.189091	Human-Chimpanzee
ENSG00000080511	0.714286	Human-Chimpanzee
ENSG00000080572	0.229947	Human-Chimpanzee
ENSG00000080608	0.188312	Human-Chimpanzee
ENSG00000080618	0.745763	Human-Chimpanzee
ENSG00000080644	0.527881	Human-Chimpanzee
ENSG00000080709	0.258065	Human-Chimpanzee
ENSG00000080802	0.170732	Human-Chimpanzee
ENSG00000080819	2.06897	Human-Chimpanzee
ENSG00000080822	0.307692	Human-Chimpanzee
ENSG00000080823	0.241135	Human-Chimpanzee
ENSG00000080824	0.194872	Human-Chimpanzee
ENSG00000080839	0.405405	Human-Chimpanzee
ENSG00000080845	0.178082	Human-Chimpanzee
ENSG00000080854	0.0707965	Human-Chimpanzee
ENSG00000080986	0.355556	Human-Chimpanzee
ENSG00000081014	0.571429	Human-Chimpanzee
ENSG00000081019	0.0731707	Human-Chimpanzee
ENSG00000081026	0.746429	Human-Chimpanzee
ENSG00000081041	0.80389	Human-Chimpanzee
ENSG00000081051	0.399371	Human-Chimpanzee
ENSG00000081052	0.802198	Human-Chimpanzee
ENSG00000081059	0.418033	Human-Chimpanzee
ENSG00000081087	0.065	Human-Chimpanzee
ENSG00000081148	0.442308	Human-Chimpanzee
ENSG00000081177	0.310811	Human-Chimpanzee
ENSG00000081237	0.536424	Human-Chimpanzee
ENSG00000081248	0.142857	Human-Chimpanzee
ENSG00000081277	0.0204918	Human-Chimpanzee
ENSG00000081307	0.129213	Human-Chimpanzee
ENSG00000081386	0.702899	Human-Chimpanzee
ENSG00000081479	0.185185	Human-Chimpanzee
ENSG00000081665	0.581967	Human-Chimpanzee
ENSG00000081692	0.305556	Human-Chimpanzee
ENSG00000081760	0.189189	Human-Chimpanzee
ENSG00000081791	0.344828	Human-Chimpanzee
ENSG00000081800	0.790123	Human-Chimpanzee
ENSG00000081803	0.116667	Human-Chimpanzee
ENSG00000081818	0.272018	Human-Chimpanzee
ENSG00000081870	0.435041	Human-Chimpanzee
ENSG00000081913	0.153226	Human-Chimpanzee
ENSG00000081923	0.0606061	Human-Chimpanzee
ENSG00000081985	0.183908	Human-Chimpanzee
ENSG00000082068	0.134228	Human-Chimpanzee
ENSG00000082074	0.361111	Human-Chimpanzee
ENSG00000082126	0.425	Human-Chimpanzee
ENSG00000082146	0.363636	Human-Chimpanzee
ENSG00000082153	0.0934579	Human-Chimpanzee
ENSG00000082175	1.25595	Human-Chimpanzee
ENSG00000082212	0.386189	Human-Chimpanzee
ENSG00000082213	0.251046	Human-Chimpanzee
ENSG00000082258	0.12963	Human-Chimpanzee
ENSG00000082269	0.675824	Human-Chimpanzee
ENSG00000082293	0.402778	Human-Chimpanzee
ENSG00000082397	0.357664	Human-Chimpanzee
ENSG00000082438	0.589744	Human-Chimpanzee
ENSG00000082458	0.628	Human-Chimpanzee
ENSG00000082497	0.508772	Human-Chimpanzee
ENSG00000082512	0.433628	Human-Chimpanzee
ENSG00000082515	0.555556	Human-Chimpanzee
ENSG00000082516	0.214286	Human-Chimpanzee
ENSG00000082556	0.166667	Human-Chimpanzee
ENSG00000082641	0.0869565	Human-Chimpanzee
ENSG00000082684	0.309677	Human-Chimpanzee
ENSG00000082701	0.67013	Human-Chimpanzee
ENSG00000082781	0.106918	Human-Chimpanzee
ENSG00000082805	0.389831	Human-Chimpanzee
ENSG00000082898	0.0421053	Human-Chimpanzee
ENSG00000083067	0.581395	Human-Chimpanzee
ENSG00000083093	0.54023	Human-Chimpanzee
ENSG00000083097	0.191176	Human-Chimpanzee
ENSG00000083099	0.251282	Human-Chimpanzee
ENSG00000083123	0.472756	Human-Chimpanzee
ENSG00000083168	0.276316	Human-Chimpanzee
ENSG00000083223	0.433333	Human-Chimpanzee
ENSG00000083290	0.25	Human-Chimpanzee
ENSG00000083444	0.211031	Human-Chimpanzee
ENSG00000083457	0.449275	Human-Chimpanzee
ENSG00000083520	0.252632	Human-Chimpanzee
ENSG00000083535	0.291262	Human-Chimpanzee
ENSG00000083544	0.416667	Human-Chimpanzee
ENSG00000083635	0.4375	Human-Chimpanzee
ENSG00000083782	0.318182	Human-Chimpanzee
ENSG00000083812	0.171662	Human-Chimpanzee
ENSG00000083814	0.777778	Human-Chimpanzee
ENSG00000083817	0.202532	Human-Chimpanzee
ENSG00000083844	0.132159	Human-Chimpanzee
ENSG00000083857	0.324324	Human-Chimpanzee
ENSG00000083896	0.0723684	Human-Chimpanzee
ENSG00000084072	0.514607	Human-Chimpanzee
ENSG00000084073	0.761905	Human-Chimpanzee
ENSG00000084090	0.0802469	Human-Chimpanzee
ENSG00000084092	0.129534	Human-Chimpanzee
ENSG00000084093	0.646018	Human-Chimpanzee
ENSG00000084110	0.336283	Human-Chimpanzee
ENSG00000084112	0.332518	Human-Chimpanzee
ENSG00000084207	0.295775	Human-Chimpanzee
ENSG00000084234	0.188525	Human-Chimpanzee
ENSG00000084444	0.5	Human-Chimpanzee
ENSG00000084453	0.215054	Human-Chimpanzee
ENSG00000084463	0.533333	Human-Chimpanzee
ENSG00000084636	0.491803	Human-Chimpanzee
ENSG00000084652	0.195402	Human-Chimpanzee
ENSG00000084674	0.76087	Human-Chimpanzee
ENSG00000084676	0.0319149	Human-Chimpanzee
ENSG00000084693	1.73913	Human-Chimpanzee
ENSG00000084710	0.0487805	Human-Chimpanzee
ENSG00000084731	0.0259067	Human-Chimpanzee
ENSG00000084734	0.516484	Human-Chimpanzee
ENSG00000084754	0.0566038	Human-Chimpanzee
ENSG00000084774	0.222222	Human-Chimpanzee
ENSG00000085117	0.0431034	Human-Chimpanzee
ENSG00000085185	0.08	Human-Chimpanzee
ENSG00000085224	0.117647	Human-Chimpanzee
ENSG00000085265	0.716961	Human-Chimpanzee
ENSG00000085276	0.19403	Human-Chimpanzee
ENSG00000085365	0.569196	Human-Chimpanzee
ENSG00000085377	0.0980392	Human-Chimpanzee
ENSG00000085382	0.0735294	Human-Chimpanzee
ENSG00000085415	0.211073	Human-Chimpanzee
ENSG00000085433	0.0724638	Human-Chimpanzee
ENSG00000085491	0.408163	Human-Chimpanzee
ENSG00000085511	0.128571	Human-Chimpanzee
ENSG00000085552	0.135922	Human-Chimpanzee
ENSG00000085563	0.184211	Human-Chimpanzee
ENSG00000085719	0.259615	Human-Chimpanzee
ENSG00000085721	0.157895	Human-Chimpanzee
ENSG00000085733	0.12931	Human-Chimpanzee
ENSG00000085760	0.625	Human-Chimpanzee
ENSG00000085788	0.0606061	Human-Chimpanzee
ENSG00000085831	0.373188	Human-Chimpanzee
ENSG00000085832	0.198113	Human-Chimpanzee
ENSG00000085840	0.610619	Human-Chimpanzee
ENSG00000085871	0.622951	Human-Chimpanzee
ENSG00000085978	0.15	Human-Chimpanzee
ENSG00000085982	0.283688	Human-Chimpanzee
ENSG00000085998	0.344828	Human-Chimpanzee
ENSG00000085999	0.419355	Human-Chimpanzee
ENSG00000086015	0.258824	Human-Chimpanzee
ENSG00000086062	0.356589	Human-Chimpanzee
ENSG00000086159	0.489796	Human-Chimpanzee
ENSG00000086200	0.0493827	Human-Chimpanzee
ENSG00000086288	0.89404	Human-Chimpanzee
ENSG00000086289	0.480315	Human-Chimpanzee
ENSG00000086504	0.166667	Human-Chimpanzee
ENSG00000086544	0.261438	Human-Chimpanzee
ENSG00000086570	0.244444	Human-Chimpanzee
ENSG00000086589	0.592308	Human-Chimpanzee
ENSG00000086619	0.176	Human-Chimpanzee
ENSG00000086696	0.227778	Human-Chimpanzee
ENSG00000086712	0.566929	Human-Chimpanzee
ENSG00000086717	0.225131	Human-Chimpanzee
ENSG00000086758	0.371901	Human-Chimpanzee
ENSG00000086967	0.349345	Human-Chimpanzee
ENSG00000086991	0.336735	Human-Chimpanzee
ENSG00000087008	0.47578	Human-Chimpanzee
ENSG00000087074	2.13793	Human-Chimpanzee
ENSG00000087086	0.489842	Human-Chimpanzee
ENSG00000087087	0.0205761	Human-Chimpanzee
ENSG00000087111	0.608696	Human-Chimpanzee
ENSG00000087116	0.282265	Human-Chimpanzee
ENSG00000087128	0.34127	Human-Chimpanzee
ENSG00000087157	0.101266	Human-Chimpanzee
ENSG00000087206	0.562069	Human-Chimpanzee
ENSG00000087237	0.429448	Human-Chimpanzee
ENSG00000087245	0.0283401	Human-Chimpanzee
ENSG00000087253	0.484375	Human-Chimpanzee
ENSG00000087263	0.836957	Human-Chimpanzee
ENSG00000087266	0.133333	Human-Chimpanzee
ENSG00000087269	0.524775	Human-Chimpanzee
ENSG00000087274	0.0714286	Human-Chimpanzee
ENSG00000087299	0.644628	Human-Chimpanzee
ENSG00000087301	0.366337	Human-Chimpanzee
ENSG00000087303	0.378378	Human-Chimpanzee
ENSG00000087338	0.382979	Human-Chimpanzee
ENSG00000087365	0.365854	Human-Chimpanzee
ENSG00000087460	0.384615	Human-Chimpanzee
ENSG00000087494	0.299625	Human-Chimpanzee
ENSG00000087495	0.333333	Human-Chimpanzee
ENSG00000087502	0.333333	Human-Chimpanzee
ENSG00000087586	0.0621762	Human-Chimpanzee
ENSG00000087589	0.564417	Human-Chimpanzee
ENSG00000087842	0.780488	Human-Chimpanzee
ENSG00000087884	1.03374	Human-Chimpanzee
ENSG00000087903	0.192857	Human-Chimpanzee
ENSG00000087995	1.04255	Human-Chimpanzee
ENSG00000088002	0.181572	Human-Chimpanzee
ENSG00000088035	0.184713	Human-Chimpanzee
ENSG00000088053	0.604167	Human-Chimpanzee
ENSG00000088179	0.174419	Human-Chimpanzee
ENSG00000088205	0.621849	Human-Chimpanzee
ENSG00000088247	0.39596	Human-Chimpanzee
ENSG00000088280	0.049505	Human-Chimpanzee
ENSG00000088298	0.111888	Human-Chimpanzee
ENSG00000088325	0.428191	Human-Chimpanzee
ENSG00000088356	0.666667	Human-Chimpanzee
ENSG00000088367	0.1	Human-Chimpanzee
ENSG00000088386	0.401316	Human-Chimpanzee
ENSG00000088387	0.496241	Human-Chimpanzee
ENSG00000088448	0.0980392	Human-Chimpanzee
ENSG00000088451	0.442105	Human-Chimpanzee
ENSG00000088538	0.131579	Human-Chimpanzee
ENSG00000088682	0.480952	Human-Chimpanzee
ENSG00000088726	0.098472	Human-Chimpanzee
ENSG00000088727	0.323944	Human-Chimpanzee
ENSG00000088756	1.06667	Human-Chimpanzee
ENSG00000088766	0.858499	Human-Chimpanzee
ENSG00000088782	1.0303	Human-Chimpanzee
ENSG00000088808	0.27551	Human-Chimpanzee
ENSG00000088812	0.075188	Human-Chimpanzee
ENSG00000088826	0.0812721	Human-Chimpanzee
ENSG00000088836	0.165217	Human-Chimpanzee
ENSG00000088854	0.144578	Human-Chimpanzee
ENSG00000088876	3.05882	Human-Chimpanzee
ENSG00000088881	0.0841121	Human-Chimpanzee
ENSG00000088882	0.365672	Human-Chimpanzee
ENSG00000088926	0.138554	Human-Chimpanzee
ENSG00000088930	0.130435	Human-Chimpanzee
ENSG00000088970	0.776596	Human-Chimpanzee
ENSG00000089022	0.558966	Human-Chimpanzee
ENSG00000089041	0.0842105	Human-Chimpanzee
ENSG00000089048	0.963303	Human-Chimpanzee
ENSG00000089060	0.27619	Human-Chimpanzee
ENSG00000089091	0.349206	Human-Chimpanzee
ENSG00000089094	0.0382514	Human-Chimpanzee
ENSG00000089101	0.530864	Human-Chimpanzee
ENSG00000089123	0.0597826	Human-Chimpanzee
ENSG00000089127	0.546667	Human-Chimpanzee
ENSG00000089154	0.0992366	Human-Chimpanzee
ENSG00000089163	0.164948	Human-Chimpanzee
ENSG00000089169	0.0466667	Human-Chimpanzee
ENSG00000089177	0.545455	Human-Chimpanzee
ENSG00000089195	0.275362	Human-Chimpanzee
ENSG00000089199	1.04938	Human-Chimpanzee
ENSG00000089225	0.0354331	Human-Chimpanzee
ENSG00000089234	0.0816327	Human-Chimpanzee
ENSG00000089248	0.375	Human-Chimpanzee
ENSG00000089250	0.092827	Human-Chimpanzee
ENSG00000089280	0.202091	Human-Chimpanzee
ENSG00000089289	0.396226	Human-Chimpanzee
ENSG00000089327	0.317073	Human-Chimpanzee
ENSG00000089335	0.514286	Human-Chimpanzee
ENSG00000089351	0.271635	Human-Chimpanzee
ENSG00000089472	0.132743	Human-Chimpanzee
ENSG00000089486	0.366667	Human-Chimpanzee
ENSG00000089505	0.299401	Human-Chimpanzee
ENSG00000089558	0.156522	Human-Chimpanzee
ENSG00000089639	0.140741	Human-Chimpanzee
ENSG00000089682	0.226766	Human-Chimpanzee
ENSG00000089692	0.342391	Human-Chimpanzee
ENSG00000089693	0.294714	Human-Chimpanzee
ENSG00000089723	0.135338	Human-Chimpanzee
ENSG00000089737	0.372093	Human-Chimpanzee
ENSG00000089775	0.27907	Human-Chimpanzee
ENSG00000089818	0.201149	Human-Chimpanzee
ENSG00000089820	0.027972	Human-Chimpanzee
ENSG00000089847	0.462903	Human-Chimpanzee
ENSG00000089876	0.0648649	Human-Chimpanzee
ENSG00000089902	0.262376	Human-Chimpanzee
ENSG00000090006	0.201299	Human-Chimpanzee
ENSG00000090013	0.341085	Human-Chimpanzee
ENSG00000090020	0.0581395	Human-Chimpanzee
ENSG00000090054	0.73743	Human-Chimpanzee
ENSG00000090061	0.540146	Human-Chimpanzee
ENSG00000090273	0.240506	Human-Chimpanzee
ENSG00000090316	0.253352	Human-Chimpanzee
ENSG00000090339	1.14216	Human-Chimpanzee
ENSG00000090372	0.0298507	Human-Chimpanzee
ENSG00000090402	0.131868	Human-Chimpanzee
ENSG00000090447	0.158621	Human-Chimpanzee
ENSG00000090512	0.727273	Human-Chimpanzee
ENSG00000090530	0.263636	Human-Chimpanzee
ENSG00000090554	0.152	Human-Chimpanzee
ENSG00000090565	0.274118	Human-Chimpanzee
ENSG00000090581	0.193192	Human-Chimpanzee
ENSG00000090612	0.525	Human-Chimpanzee
ENSG00000090615	0.233813	Human-Chimpanzee
ENSG00000090659	0.494553	Human-Chimpanzee
ENSG00000090674	0.180392	Human-Chimpanzee
ENSG00000090686	0.178571	Human-Chimpanzee
ENSG00000090776	0.0882353	Human-Chimpanzee
ENSG00000090861	0.0487805	Human-Chimpanzee
ENSG00000090863	0.0882353	Human-Chimpanzee
ENSG00000090905	0.489051	Human-Chimpanzee
ENSG00000090975	0.0890688	Human-Chimpanzee
ENSG00000091106	0.254237	Human-Chimpanzee
ENSG00000091128	0.62766	Human-Chimpanzee
ENSG00000091129	0.0444444	Human-Chimpanzee
ENSG00000091136	0.504587	Human-Chimpanzee
ENSG00000091137	0.297297	Human-Chimpanzee
ENSG00000091138	0.49569	Human-Chimpanzee
ENSG00000091157	0.111607	Human-Chimpanzee
ENSG00000091164	0.685315	Human-Chimpanzee
ENSG00000091181	0.58125	Human-Chimpanzee
ENSG00000091409	0.0778443	Human-Chimpanzee
ENSG00000091428	0.0609756	Human-Chimpanzee
ENSG00000091436	0.609428	Human-Chimpanzee
ENSG00000091482	0.603783	Human-Chimpanzee
ENSG00000091483	0.173913	Human-Chimpanzee
ENSG00000091490	0.257143	Human-Chimpanzee
ENSG00000091513	0.302521	Human-Chimpanzee
ENSG00000091527	1.65455	Human-Chimpanzee
ENSG00000091536	0.214789	Human-Chimpanzee
ENSG00000091583	0.194245	Human-Chimpanzee
ENSG00000091592	0.603053	Human-Chimpanzee
ENSG00000091622	0.140762	Human-Chimpanzee
ENSG00000091640	0.148936	Human-Chimpanzee
ENSG00000091656	0.183908	Human-Chimpanzee
ENSG00000091704	0.0953488	Human-Chimpanzee
ENSG00000091732	0.285714	Human-Chimpanzee
ENSG00000091831	0.132616	Human-Chimpanzee
ENSG00000091879	0.070922	Human-Chimpanzee
ENSG00000091972	0.333333	Human-Chimpanzee
ENSG00000091986	0.181818	Human-Chimpanzee
ENSG00000092009	0.461538	Human-Chimpanzee
ENSG00000092054	0.0236842	Human-Chimpanzee
ENSG00000092067	0.161616	Human-Chimpanzee
ENSG00000092140	0.209302	Human-Chimpanzee
ENSG00000092203	0.150943	Human-Chimpanzee
ENSG00000092295	0.0990991	Human-Chimpanzee
ENSG00000092330	0.614679	Human-Chimpanzee
ENSG00000092421	0.157303	Human-Chimpanzee
ENSG00000092439	0.032967	Human-Chimpanzee
ENSG00000092445	0.142857	Human-Chimpanzee
ENSG00000092470	0.598214	Human-Chimpanzee
ENSG00000092529	0.0484581	Human-Chimpanzee
ENSG00000092607	0.0625	Human-Chimpanzee
ENSG00000092621	0.0506329	Human-Chimpanzee
ENSG00000092820	0.0824742	Human-Chimpanzee
ENSG00000092847	0.379121	Human-Chimpanzee
ENSG00000092850	0.259259	Human-Chimpanzee
ENSG00000092853	0.580392	Human-Chimpanzee
ENSG00000092871	0.482759	Human-Chimpanzee
ENSG00000092929	0.149533	Human-Chimpanzee
ENSG00000092978	0.45	Human-Chimpanzee
ENSG00000093000	0.588235	Human-Chimpanzee
ENSG00000093009	0.10241	Human-Chimpanzee
ENSG00000093010	0.0962733	Human-Chimpanzee
ENSG00000093072	0.288462	Human-Chimpanzee
ENSG00000093144	0.213333	Human-Chimpanzee
ENSG00000093167	0.358491	Human-Chimpanzee
ENSG00000093183	0.189474	Human-Chimpanzee
ENSG00000093217	0.462963	Human-Chimpanzee
ENSG00000094661	1.23043	Human-Chimpanzee
ENSG00000094755	0.0431373	Human-Chimpanzee
ENSG00000094796	0.015015	Human-Chimpanzee
ENSG00000094841	0.422652	Human-Chimpanzee
ENSG00000094880	0.0860215	Human-Chimpanzee
ENSG00000094914	0.182796	Human-Chimpanzee
ENSG00000094916	0.809877	Human-Chimpanzee
ENSG00000094963	0.101124	Human-Chimpanzee
ENSG00000094975	0.772414	Human-Chimpanzee
ENSG00000095002	0.376855	Human-Chimpanzee
ENSG00000095015	0.315068	Human-Chimpanzee
ENSG00000095066	0.0913706	Human-Chimpanzee
ENSG00000095110	0.365079	Human-Chimpanzee
ENSG00000095139	0.548387	Human-Chimpanzee
ENSG00000095203	0.285714	Human-Chimpanzee
ENSG00000095209	0.750499	Human-Chimpanzee
ENSG00000095261	0.0793651	Human-Chimpanzee
ENSG00000095303	0.287879	Human-Chimpanzee
ENSG00000095370	0.0381679	Human-Chimpanzee
ENSG00000095383	0.123377	Human-Chimpanzee
ENSG00000095397	0.335135	Human-Chimpanzee
ENSG00000095464	0.124031	Human-Chimpanzee
ENSG00000095485	2.72222	Human-Chimpanzee
ENSG00000095539	0.344828	Human-Chimpanzee
ENSG00000095574	0.120879	Human-Chimpanzee
ENSG00000095585	0.190184	Human-Chimpanzee
ENSG00000095587	0.296296	Human-Chimpanzee
ENSG00000095596	0.166667	Human-Chimpanzee
ENSG00000095627	0.411765	Human-Chimpanzee
ENSG00000095637	0.5	Human-Chimpanzee
ENSG00000095713	0.0747922	Human-Chimpanzee
ENSG00000095739	0.0735931	Human-Chimpanzee
ENSG00000095777	0.606742	Human-Chimpanzee
ENSG00000095787	0.605263	Human-Chimpanzee
ENSG00000095794	0.733333	Human-Chimpanzee
ENSG00000095906	0.0548926	Human-Chimpanzee
ENSG00000095951	0.513761	Human-Chimpanzee
ENSG00000095970	0.554545	Human-Chimpanzee
ENSG00000095981	0.38498	Human-Chimpanzee
ENSG00000096063	0.481481	Human-Chimpanzee
ENSG00000096070	0.186916	Human-Chimpanzee
ENSG00000096093	0.352601	Human-Chimpanzee
ENSG00000096395	0.628049	Human-Chimpanzee
ENSG00000096401	0.0967742	Human-Chimpanzee
ENSG00000096433	0.0948905	Human-Chimpanzee
ENSG00000096696	0.0833333	Human-Chimpanzee
ENSG00000096872	0.283582	Human-Chimpanzee
ENSG00000096968	0.663677	Human-Chimpanzee
ENSG00000096996	0.217617	Human-Chimpanzee
ENSG00000097021	0.0491071	Human-Chimpanzee
ENSG00000097046	1.7	Human-Chimpanzee
ENSG00000097096	0.552381	Human-Chimpanzee
ENSG00000099139	0.313514	Human-Chimpanzee
ENSG00000099204	0.046875	Human-Chimpanzee
ENSG00000099219	0.190141	Human-Chimpanzee
ENSG00000099250	0.116667	Human-Chimpanzee
ENSG00000099256	0.488743	Human-Chimpanzee
ENSG00000099260	0.477419	Human-Chimpanzee
ENSG00000099308	0.0607735	Human-Chimpanzee
ENSG00000099331	0.289655	Human-Chimpanzee
ENSG00000099337	0.519231	Human-Chimpanzee
ENSG00000099338	0.224242	Human-Chimpanzee
ENSG00000099365	0.424642	Human-Chimpanzee
ENSG00000099377	0.324503	Human-Chimpanzee
ENSG00000099381	0.126984	Human-Chimpanzee
ENSG00000099399	2.77941	Human-Chimpanzee
ENSG00000099617	0.176011	Human-Chimpanzee
ENSG00000099622	0.752756	Human-Chimpanzee
ENSG00000099625	0.393386	Human-Chimpanzee
ENSG00000099769	0.12616	Human-Chimpanzee
ENSG00000099783	0.119497	Human-Chimpanzee
ENSG00000099785	0.235955	Human-Chimpanzee
ENSG00000099797	0.283079	Human-Chimpanzee
ENSG00000099804	0.0452675	Human-Chimpanzee
ENSG00000099810	0.497959	Human-Chimpanzee
ENSG00000099812	0.309091	Human-Chimpanzee
ENSG00000099814	0.180501	Human-Chimpanzee
ENSG00000099817	0.0533708	Human-Chimpanzee
ENSG00000099821	0.139597	Human-Chimpanzee
ENSG00000099822	0.139894	Human-Chimpanzee
ENSG00000099834	0.453258	Human-Chimpanzee
ENSG00000099840	0.453125	Human-Chimpanzee
ENSG00000099849	0.22043	Human-Chimpanzee
ENSG00000099864	0.0292887	Human-Chimpanzee
ENSG00000099875	0.0192308	Human-Chimpanzee
ENSG00000099889	0.187135	Human-Chimpanzee
ENSG00000099899	0.225	Human-Chimpanzee
ENSG00000099904	0.328967	Human-Chimpanzee
ENSG00000099910	0.0443038	Human-Chimpanzee
ENSG00000099917	0.0431655	Human-Chimpanzee
ENSG00000099937	0.0757576	Human-Chimpanzee
ENSG00000099940	0.463415	Human-Chimpanzee
ENSG00000099954	0.328947	Human-Chimpanzee
ENSG00000099956	0.157143	Human-Chimpanzee
ENSG00000099958	0.275562	Human-Chimpanzee
ENSG00000099968	0.285714	Human-Chimpanzee
ENSG00000099985	0.478261	Human-Chimpanzee
ENSG00000099991	0.103448	Human-Chimpanzee
ENSG00000099998	0.22	Human-Chimpanzee
ENSG00000100003	0.380435	Human-Chimpanzee
ENSG00000100012	0.388889	Human-Chimpanzee
ENSG00000100014	0.145455	Human-Chimpanzee
ENSG00000100023	0.465438	Human-Chimpanzee
ENSG00000100029	0.0734177	Human-Chimpanzee
ENSG00000100034	0.369369	Human-Chimpanzee
ENSG00000100036	0.0320197	Human-Chimpanzee
ENSG00000100038	0.0171233	Human-Chimpanzee
ENSG00000100055	0.0680346	Human-Chimpanzee
ENSG00000100056	0.0386266	Human-Chimpanzee
ENSG00000100060	0.334906	Human-Chimpanzee
ENSG00000100065	0.04	Human-Chimpanzee
ENSG00000100075	0.104839	Human-Chimpanzee
ENSG00000100078	0.738806	Human-Chimpanzee
ENSG00000100079	0.797753	Human-Chimpanzee
ENSG00000100083	0.277311	Human-Chimpanzee
ENSG00000100084	0.0793651	Human-Chimpanzee
ENSG00000100100	0.309091	Human-Chimpanzee
ENSG00000100105	0.0795455	Human-Chimpanzee
ENSG00000100106	0.503311	Human-Chimpanzee
ENSG00000100116	0.379747	Human-Chimpanzee
ENSG00000100139	0.308333	Human-Chimpanzee
ENSG00000100146	0.0740741	Human-Chimpanzee
ENSG00000100147	0.719298	Human-Chimpanzee
ENSG00000100151	0.0808824	Human-Chimpanzee
ENSG00000100156	0.152778	Human-Chimpanzee
ENSG00000100170	0.384615	Human-Chimpanzee
ENSG00000100196	0.341053	Human-Chimpanzee
ENSG00000100197	0.223377	Human-Chimpanzee
ENSG00000100201	0.534826	Human-Chimpanzee
ENSG00000100207	0.223684	Human-Chimpanzee
ENSG00000100218	0.139286	Human-Chimpanzee
ENSG00000100225	1.17391	Human-Chimpanzee
ENSG00000100227	0.153846	Human-Chimpanzee
ENSG00000100228	0.227273	Human-Chimpanzee
ENSG00000100239	0.100529	Human-Chimpanzee
ENSG00000100241	0.0711462	Human-Chimpanzee
ENSG00000100242	0.166667	Human-Chimpanzee
ENSG00000100243	0.666667	Human-Chimpanzee
ENSG00000100249	0.545455	Human-Chimpanzee
ENSG00000100253	0.112782	Human-Chimpanzee
ENSG00000100258	0.337432	Human-Chimpanzee
ENSG00000100263	0.366906	Human-Chimpanzee
ENSG00000100266	0.243243	Human-Chimpanzee
ENSG00000100271	0.577825	Human-Chimpanzee
ENSG00000100280	0.51227	Human-Chimpanzee
ENSG00000100281	0.22973	Human-Chimpanzee
ENSG00000100284	0.0722892	Human-Chimpanzee
ENSG00000100285	0.258824	Human-Chimpanzee
ENSG00000100288	0.0733333	Human-Chimpanzee
ENSG00000100290	0.328244	Human-Chimpanzee
ENSG00000100294	0.247423	Human-Chimpanzee
ENSG00000100296	0.172414	Human-Chimpanzee
ENSG00000100297	0.10625	Human-Chimpanzee
ENSG00000100298	0.879859	Human-Chimpanzee
ENSG00000100299	0.0891089	Human-Chimpanzee
ENSG00000100300	0.497561	Human-Chimpanzee
ENSG00000100304	0.2	Human-Chimpanzee
ENSG00000100307	0.21204	Human-Chimpanzee
ENSG00000100311	0.0994475	Human-Chimpanzee
ENSG00000100320	0.161765	Human-Chimpanzee
ENSG00000100321	0.0648855	Human-Chimpanzee
ENSG00000100324	0.275862	Human-Chimpanzee
ENSG00000100325	0.190083	Human-Chimpanzee
ENSG00000100330	0.627358	Human-Chimpanzee
ENSG00000100335	0.348624	Human-Chimpanzee
ENSG00000100341	0.39779	Human-Chimpanzee
ENSG00000100346	0.0626959	Human-Chimpanzee
ENSG00000100350	0.240838	Human-Chimpanzee
ENSG00000100351	0.0732984	Human-Chimpanzee
ENSG00000100354	0.482759	Human-Chimpanzee
ENSG00000100359	0.027907	Human-Chimpanzee
ENSG00000100362	0.144928	Human-Chimpanzee
ENSG00000100364	0.0744681	Human-Chimpanzee
ENSG00000100365	0.447843	Human-Chimpanzee
ENSG00000100368	0.339564	Human-Chimpanzee
ENSG00000100372	0.0872093	Human-Chimpanzee
ENSG00000100373	0.207048	Human-Chimpanzee
ENSG00000100376	0.56	Human-Chimpanzee
ENSG00000100379	0.12037	Human-Chimpanzee
ENSG00000100385	0.27897	Human-Chimpanzee
ENSG00000100393	0.11976	Human-Chimpanzee
ENSG00000100395	0.364929	Human-Chimpanzee
ENSG00000100401	0.204819	Human-Chimpanzee
ENSG00000100403	0.185841	Human-Chimpanzee
ENSG00000100412	0.198171	Human-Chimpanzee
ENSG00000100416	0.0733333	Human-Chimpanzee
ENSG00000100422	0.286445	Human-Chimpanzee
ENSG00000100425	0.0411765	Human-Chimpanzee
ENSG00000100426	0.22	Human-Chimpanzee
ENSG00000100427	0.513774	Human-Chimpanzee
ENSG00000100429	0.316239	Human-Chimpanzee
ENSG00000100433	0.153509	Human-Chimpanzee
ENSG00000100441	0.407407	Human-Chimpanzee
ENSG00000100445	0.866913	Human-Chimpanzee
ENSG00000100448	0.360294	Human-Chimpanzee
ENSG00000100453	0.672727	Human-Chimpanzee
ENSG00000100462	0.466077	Human-Chimpanzee
ENSG00000100483	0.316667	Human-Chimpanzee
ENSG00000100485	0.0648148	Human-Chimpanzee
ENSG00000100490	0.518182	Human-Chimpanzee
ENSG00000100503	0.349558	Human-Chimpanzee
ENSG00000100504	0.0903955	Human-Chimpanzee
ENSG00000100505	0.257143	Human-Chimpanzee
ENSG00000100519	0.683099	Human-Chimpanzee
ENSG00000100523	0.232558	Human-Chimpanzee
ENSG00000100557	0.528302	Human-Chimpanzee
ENSG00000100558	0.0833333	Human-Chimpanzee
ENSG00000100565	0.45618	Human-Chimpanzee
ENSG00000100577	1.35484	Human-Chimpanzee
ENSG00000100578	0.692308	Human-Chimpanzee
ENSG00000100580	0.319938	Human-Chimpanzee
ENSG00000100591	0.517241	Human-Chimpanzee
ENSG00000100593	0.384236	Human-Chimpanzee
ENSG00000100599	0.169399	Human-Chimpanzee
ENSG00000100600	0.180412	Human-Chimpanzee
ENSG00000100601	0.1875	Human-Chimpanzee
ENSG00000100603	0.141667	Human-Chimpanzee
ENSG00000100605	0.118577	Human-Chimpanzee
ENSG00000100612	0.528	Human-Chimpanzee
ENSG00000100625	0.158537	Human-Chimpanzee
ENSG00000100626	0.0361991	Human-Chimpanzee
ENSG00000100628	0.127517	Human-Chimpanzee
ENSG00000100629	0.864198	Human-Chimpanzee
ENSG00000100632	0.785965	Human-Chimpanzee
ENSG00000100644	0.846154	Human-Chimpanzee
ENSG00000100647	0.7	Human-Chimpanzee
ENSG00000100652	0.184332	Human-Chimpanzee
ENSG00000100664	0.137931	Human-Chimpanzee
ENSG00000100697	0.0877193	Human-Chimpanzee
ENSG00000100711	0.201581	Human-Chimpanzee
ENSG00000100714	0.587444	Human-Chimpanzee
ENSG00000100721	0.189189	Human-Chimpanzee
ENSG00000100722	0.170732	Human-Chimpanzee
ENSG00000100726	0.210375	Human-Chimpanzee
ENSG00000100731	0.339286	Human-Chimpanzee
ENSG00000100739	0.733882	Human-Chimpanzee
ENSG00000100749	0.0967742	Human-Chimpanzee
ENSG00000100767	0.217593	Human-Chimpanzee
ENSG00000100802	0.227848	Human-Chimpanzee
ENSG00000100811	0.106383	Human-Chimpanzee
ENSG00000100813	0.158879	Human-Chimpanzee
ENSG00000100814	0.0824176	Human-Chimpanzee
ENSG00000100815	0.2	Human-Chimpanzee
ENSG00000100823	0.2	Human-Chimpanzee
ENSG00000100836	0.582248	Human-Chimpanzee
ENSG00000100865	0.716216	Human-Chimpanzee
ENSG00000100884	0.406977	Human-Chimpanzee
ENSG00000100888	0.12069	Human-Chimpanzee
ENSG00000100889	0.358333	Human-Chimpanzee
ENSG00000100906	0.147368	Human-Chimpanzee
ENSG00000100934	0.047619	Human-Chimpanzee
ENSG00000100941	0.197861	Human-Chimpanzee
ENSG00000100949	0.163636	Human-Chimpanzee
ENSG00000100968	0.683983	Human-Chimpanzee
ENSG00000100979	0.470982	Human-Chimpanzee
ENSG00000100982	0.223368	Human-Chimpanzee
ENSG00000100983	0.103093	Human-Chimpanzee
ENSG00000100985	0.205128	Human-Chimpanzee
ENSG00000100987	0.205556	Human-Chimpanzee
ENSG00000100991	0.046875	Human-Chimpanzee
ENSG00000101000	0.331395	Human-Chimpanzee
ENSG00000101004	0.650943	Human-Chimpanzee
ENSG00000101040	0.329787	Human-Chimpanzee
ENSG00000101049	0.372807	Human-Chimpanzee
ENSG00000101057	0.280632	Human-Chimpanzee
ENSG00000101074	0.302857	Human-Chimpanzee
ENSG00000101076	0.0213777	Human-Chimpanzee
ENSG00000101082	0.424242	Human-Chimpanzee
ENSG00000101096	0.438406	Human-Chimpanzee
ENSG00000101104	0.0923913	Human-Chimpanzee
ENSG00000101109	0.0536913	Human-Chimpanzee
ENSG00000101115	0.329268	Human-Chimpanzee
ENSG00000101126	0.197183	Human-Chimpanzee
ENSG00000101150	0.458333	Human-Chimpanzee
ENSG00000101158	0.213333	Human-Chimpanzee
ENSG00000101162	0.15873	Human-Chimpanzee
ENSG00000101166	0.108491	Human-Chimpanzee
ENSG00000101180	0.0629371	Human-Chimpanzee
ENSG00000101181	0.431138	Human-Chimpanzee
ENSG00000101182	0.169355	Human-Chimpanzee
ENSG00000101187	0.0962441	Human-Chimpanzee
ENSG00000101188	0.0503597	Human-Chimpanzee
ENSG00000101190	0.5498	Human-Chimpanzee
ENSG00000101191	0.108696	Human-Chimpanzee
ENSG00000101194	0.121849	Human-Chimpanzee
ENSG00000101197	0.334365	Human-Chimpanzee
ENSG00000101198	0.539007	Human-Chimpanzee
ENSG00000101199	0.374359	Human-Chimpanzee
ENSG00000101200	0.130499	Human-Chimpanzee
ENSG00000101203	0.327759	Human-Chimpanzee
ENSG00000101204	0.337337	Human-Chimpanzee
ENSG00000101213	0.104046	Human-Chimpanzee
ENSG00000101216	0.0397022	Human-Chimpanzee
ENSG00000101220	0.355263	Human-Chimpanzee
ENSG00000101222	0.113269	Human-Chimpanzee
ENSG00000101224	0.166667	Human-Chimpanzee
ENSG00000101230	0.281477	Human-Chimpanzee
ENSG00000101247	0.166667	Human-Chimpanzee
ENSG00000101251	0.710811	Human-Chimpanzee
ENSG00000101255	0.25	Human-Chimpanzee
ENSG00000101265	0.0742574	Human-Chimpanzee
ENSG00000101276	0.194529	Human-Chimpanzee
ENSG00000101280	0.252577	Human-Chimpanzee
ENSG00000101282	0.876543	Human-Chimpanzee
ENSG00000101290	0.177966	Human-Chimpanzee
ENSG00000101292	0.227425	Human-Chimpanzee
ENSG00000101306	0.189655	Human-Chimpanzee
ENSG00000101310	0.151899	Human-Chimpanzee
ENSG00000101311	0.129213	Human-Chimpanzee
ENSG00000101327	0.409302	Human-Chimpanzee
ENSG00000101331	0.0904977	Human-Chimpanzee
ENSG00000101333	0.197674	Human-Chimpanzee
ENSG00000101336	0.0672269	Human-Chimpanzee
ENSG00000101343	0.09375	Human-Chimpanzee
ENSG00000101347	0.417722	Human-Chimpanzee
ENSG00000101349	0.134021	Human-Chimpanzee
ENSG00000101353	0.777483	Human-Chimpanzee
ENSG00000101361	0.41844	Human-Chimpanzee
ENSG00000101363	0.375839	Human-Chimpanzee
ENSG00000101365	0.555366	Human-Chimpanzee
ENSG00000101384	0.0669643	Human-Chimpanzee
ENSG00000101391	0.138514	Human-Chimpanzee
ENSG00000101400	0.262136	Human-Chimpanzee
ENSG00000101407	0.782609	Human-Chimpanzee
ENSG00000101425	0.519774	Human-Chimpanzee
ENSG00000101438	0.0570342	Human-Chimpanzee
ENSG00000101440	0.698529	Human-Chimpanzee
ENSG00000101442	0.258333	Human-Chimpanzee
ENSG00000101445	0.057971	Human-Chimpanzee
ENSG00000101447	0.240196	Human-Chimpanzee
ENSG00000101452	0.343284	Human-Chimpanzee
ENSG00000101473	0.285714	Human-Chimpanzee
ENSG00000101474	0.461538	Human-Chimpanzee
ENSG00000101493	0.192623	Human-Chimpanzee
ENSG00000101542	0.0263158	Human-Chimpanzee
ENSG00000101544	0.0816327	Human-Chimpanzee
ENSG00000101546	2.12121	Human-Chimpanzee
ENSG00000101558	0.123077	Human-Chimpanzee
ENSG00000101574	0.24581	Human-Chimpanzee
ENSG00000101577	0.0793651	Human-Chimpanzee
ENSG00000101596	0.23301	Human-Chimpanzee
ENSG00000101605	0.273196	Human-Chimpanzee
ENSG00000101624	0.0630631	Human-Chimpanzee
ENSG00000101638	0.0348432	Human-Chimpanzee
ENSG00000101639	0.675676	Human-Chimpanzee
ENSG00000101654	0.599349	Human-Chimpanzee
ENSG00000101665	0.27027	Human-Chimpanzee
ENSG00000101670	0.0636943	Human-Chimpanzee
ENSG00000101680	0.382775	Human-Chimpanzee
ENSG00000101695	0.316667	Human-Chimpanzee
ENSG00000101745	0.541667	Human-Chimpanzee
ENSG00000101751	0.356322	Human-Chimpanzee
ENSG00000101752	0.434615	Human-Chimpanzee
ENSG00000101773	0.307229	Human-Chimpanzee
ENSG00000101782	0.214286	Human-Chimpanzee
ENSG00000101842	2.13043	Human-Chimpanzee
ENSG00000101844	1.32143	Human-Chimpanzee
ENSG00000101846	0.76087	Human-Chimpanzee
ENSG00000101849	0.448847	Human-Chimpanzee
ENSG00000101850	0.924528	Human-Chimpanzee
ENSG00000101868	0.347826	Human-Chimpanzee
ENSG00000101871	0.328014	Human-Chimpanzee
ENSG00000101882	0.180328	Human-Chimpanzee
ENSG00000101888	0.519608	Human-Chimpanzee
ENSG00000101890	0.390805	Human-Chimpanzee
ENSG00000101892	0.576923	Human-Chimpanzee
ENSG00000101916	0.131944	Human-Chimpanzee
ENSG00000101958	0.0703883	Human-Chimpanzee
ENSG00000101974	0.4875	Human-Chimpanzee
ENSG00000101977	0.287234	Human-Chimpanzee
ENSG00000101981	1.17647	Human-Chimpanzee
ENSG00000101986	0.0506912	Human-Chimpanzee
ENSG00000101997	0.13125	Human-Chimpanzee
ENSG00000102001	0.282443	Human-Chimpanzee
ENSG00000102010	0.125	Human-Chimpanzee
ENSG00000102032	0.389121	Human-Chimpanzee
ENSG00000102043	0.95	Human-Chimpanzee
ENSG00000102048	0.449889	Human-Chimpanzee
ENSG00000102053	0.352941	Human-Chimpanzee
ENSG00000102055	0.869231	Human-Chimpanzee
ENSG00000102078	0.729234	Human-Chimpanzee
ENSG00000102081	0.0451613	Human-Chimpanzee
ENSG00000102096	0.102941	Human-Chimpanzee
ENSG00000102098	0.702703	Human-Chimpanzee
ENSG00000102100	0.641084	Human-Chimpanzee
ENSG00000102119	0.490741	Human-Chimpanzee
ENSG00000102125	0.415475	Human-Chimpanzee
ENSG00000102144	0.404367	Human-Chimpanzee
ENSG00000102145	0.16	Human-Chimpanzee
ENSG00000102158	0.107438	Human-Chimpanzee
ENSG00000102174	0.430769	Human-Chimpanzee
ENSG00000102178	0.611456	Human-Chimpanzee
ENSG00000102181	1.39024	Human-Chimpanzee
ENSG00000102189	0.304348	Human-Chimpanzee
ENSG00000102195	1.54	Human-Chimpanzee
ENSG00000102218	0.391304	Human-Chimpanzee
ENSG00000102225	0.115385	Human-Chimpanzee
ENSG00000102241	0.205882	Human-Chimpanzee
ENSG00000102243	0.325991	Human-Chimpanzee
ENSG00000102245	0.293103	Human-Chimpanzee
ENSG00000102271	0.583051	Human-Chimpanzee
ENSG00000102290	0.6	Human-Chimpanzee
ENSG00000102312	0.0729927	Human-Chimpanzee
ENSG00000102313	0.575	Human-Chimpanzee
ENSG00000102359	0.794224	Human-Chimpanzee
ENSG00000102383	0.181818	Human-Chimpanzee
ENSG00000102384	0.384236	Human-Chimpanzee
ENSG00000102385	0.0617284	Human-Chimpanzee
ENSG00000102387	1.09945	Human-Chimpanzee
ENSG00000102390	0.843961	Human-Chimpanzee
ENSG00000102445	1.61702	Human-Chimpanzee
ENSG00000102468	0.0337079	Human-Chimpanzee
ENSG00000102471	0.295775	Human-Chimpanzee
ENSG00000102531	0.3	Human-Chimpanzee
ENSG00000102539	0.160377	Human-Chimpanzee
ENSG00000102554	0.535714	Human-Chimpanzee
ENSG00000102572	0.0632184	Human-Chimpanzee
ENSG00000102575	0.17623	Human-Chimpanzee
ENSG00000102580	0.125	Human-Chimpanzee
ENSG00000102595	0.567901	Human-Chimpanzee
ENSG00000102606	0.0442478	Human-Chimpanzee
ENSG00000102683	1.13846	Human-Chimpanzee
ENSG00000102738	0.321429	Human-Chimpanzee
ENSG00000102743	0.180328	Human-Chimpanzee
ENSG00000102755	0.224638	Human-Chimpanzee
ENSG00000102763	0.245763	Human-Chimpanzee
ENSG00000102780	0.0784314	Human-Chimpanzee
ENSG00000102781	0.434783	Human-Chimpanzee
ENSG00000102786	0.25	Human-Chimpanzee
ENSG00000102794	0.564841	Human-Chimpanzee
ENSG00000102796	5.11765	Human-Chimpanzee
ENSG00000102802	0.289017	Human-Chimpanzee
ENSG00000102804	0.490909	Human-Chimpanzee
ENSG00000102805	0.552147	Human-Chimpanzee
ENSG00000102837	0.114458	Human-Chimpanzee
ENSG00000102854	0.370656	Human-Chimpanzee
ENSG00000102858	0.156823	Human-Chimpanzee
ENSG00000102878	0.660099	Human-Chimpanzee
ENSG00000102879	0.25	Human-Chimpanzee
ENSG00000102890	0.203125	Human-Chimpanzee
ENSG00000102891	0.619658	Human-Chimpanzee
ENSG00000102893	0.0444444	Human-Chimpanzee
ENSG00000102900	0.47619	Human-Chimpanzee
ENSG00000102901	1.87302	Human-Chimpanzee
ENSG00000102904	0.403846	Human-Chimpanzee
ENSG00000102908	0.11236	Human-Chimpanzee
ENSG00000102910	0.117647	Human-Chimpanzee
ENSG00000102921	0.69697	Human-Chimpanzee
ENSG00000102934	0.138728	Human-Chimpanzee
ENSG00000102935	0.0114068	Human-Chimpanzee
ENSG00000102962	0.260101	Human-Chimpanzee
ENSG00000102967	0.123762	Human-Chimpanzee
ENSG00000102977	0.412698	Human-Chimpanzee
ENSG00000102996	0.0681004	Human-Chimpanzee
ENSG00000103021	1.25	Human-Chimpanzee
ENSG00000103023	0.46789	Human-Chimpanzee
ENSG00000103037	0.211679	Human-Chimpanzee
ENSG00000103042	0.0873786	Human-Chimpanzee
ENSG00000103043	0.055	Human-Chimpanzee
ENSG00000103047	0.362903	Human-Chimpanzee
ENSG00000103051	0.402299	Human-Chimpanzee
ENSG00000103056	0.0539419	Human-Chimpanzee
ENSG00000103061	0.252101	Human-Chimpanzee
ENSG00000103066	0.370968	Human-Chimpanzee
ENSG00000103067	0.26	Human-Chimpanzee
ENSG00000103089	0.0419847	Human-Chimpanzee
ENSG00000103091	0.0540541	Human-Chimpanzee
ENSG00000103121	0.362441	Human-Chimpanzee
ENSG00000103126	0.264589	Human-Chimpanzee
ENSG00000103148	0.36689	Human-Chimpanzee
ENSG00000103150	0.234043	Human-Chimpanzee
ENSG00000103152	0.393333	Human-Chimpanzee
ENSG00000103154	0.138211	Human-Chimpanzee
ENSG00000103160	0.15508	Human-Chimpanzee
ENSG00000103168	0.661538	Human-Chimpanzee
ENSG00000103174	0.0677291	Human-Chimpanzee
ENSG00000103175	0.306122	Human-Chimpanzee
ENSG00000103184	0.107296	Human-Chimpanzee
ENSG00000103187	0.758242	Human-Chimpanzee
ENSG00000103194	0.478261	Human-Chimpanzee
ENSG00000103197	0.156934	Human-Chimpanzee
ENSG00000103199	0.189759	Human-Chimpanzee
ENSG00000103222	0.0314685	Human-Chimpanzee
ENSG00000103227	0.226467	Human-Chimpanzee
ENSG00000103241	0.0246305	Human-Chimpanzee
ENSG00000103245	0.076	Human-Chimpanzee
ENSG00000103248	0.483096	Human-Chimpanzee
ENSG00000103249	0.04	Human-Chimpanzee
ENSG00000103253	0.380827	Human-Chimpanzee
ENSG00000103254	1.9403	Human-Chimpanzee
ENSG00000103257	0.0586081	Human-Chimpanzee
ENSG00000103260	0.110465	Human-Chimpanzee
ENSG00000103264	0.0417827	Human-Chimpanzee
ENSG00000103269	0.435484	Human-Chimpanzee
ENSG00000103274	0.337017	Human-Chimpanzee
ENSG00000103310	0.414894	Human-Chimpanzee
ENSG00000103316	0.0955414	Human-Chimpanzee
ENSG00000103319	0.371212	Human-Chimpanzee
ENSG00000103326	0.268293	Human-Chimpanzee
ENSG00000103335	0.0913978	Human-Chimpanzee
ENSG00000103342	0.494118	Human-Chimpanzee
ENSG00000103343	0.221053	Human-Chimpanzee
ENSG00000103351	0.5	Human-Chimpanzee
ENSG00000103353	0.223077	Human-Chimpanzee
ENSG00000103356	0.470588	Human-Chimpanzee
ENSG00000103365	0.245902	Human-Chimpanzee
ENSG00000103375	0.183673	Human-Chimpanzee
ENSG00000103381	0.106	Human-Chimpanzee
ENSG00000103404	0.184358	Human-Chimpanzee
ENSG00000103415	0.627907	Human-Chimpanzee
ENSG00000103423	0.131944	Human-Chimpanzee
ENSG00000103429	0.478873	Human-Chimpanzee
ENSG00000103449	1.1215	Human-Chimpanzee
ENSG00000103460	0.353846	Human-Chimpanzee
ENSG00000103479	0.105263	Human-Chimpanzee
ENSG00000103489	0.0706522	Human-Chimpanzee
ENSG00000103494	0.385417	Human-Chimpanzee
ENSG00000103495	0.08	Human-Chimpanzee
ENSG00000103507	0.0797101	Human-Chimpanzee
ENSG00000103510	0.331754	Human-Chimpanzee
ENSG00000103522	0.1375	Human-Chimpanzee
ENSG00000103528	0.22191	Human-Chimpanzee
ENSG00000103534	0.595745	Human-Chimpanzee
ENSG00000103540	1.0625	Human-Chimpanzee
ENSG00000103544	0.121795	Human-Chimpanzee
ENSG00000103546	0.470968	Human-Chimpanzee
ENSG00000103549	0.267327	Human-Chimpanzee
ENSG00000103569	0.444444	Human-Chimpanzee
ENSG00000103591	0.102041	Human-Chimpanzee
ENSG00000103599	0.554348	Human-Chimpanzee
ENSG00000103642	1.35	Human-Chimpanzee
ENSG00000103657	0.135417	Human-Chimpanzee
ENSG00000103671	0.820331	Human-Chimpanzee
ENSG00000103707	0.0533333	Human-Chimpanzee
ENSG00000103710	0.0865922	Human-Chimpanzee
ENSG00000103723	0.101695	Human-Chimpanzee
ENSG00000103740	0.617925	Human-Chimpanzee
ENSG00000103742	0.247619	Human-Chimpanzee
ENSG00000103811	0.0553191	Human-Chimpanzee
ENSG00000103852	0.527675	Human-Chimpanzee
ENSG00000103876	0.937722	Human-Chimpanzee
ENSG00000103888	0.261682	Human-Chimpanzee
ENSG00000103932	0.451613	Human-Chimpanzee
ENSG00000103942	0.035503	Human-Chimpanzee
ENSG00000103966	0.109589	Human-Chimpanzee
ENSG00000103978	0.181818	Human-Chimpanzee
ENSG00000103994	0.438596	Human-Chimpanzee
ENSG00000103995	0.802326	Human-Chimpanzee
ENSG00000104043	0.26087	Human-Chimpanzee
ENSG00000104044	0.423077	Human-Chimpanzee
ENSG00000104059	1.34568	Human-Chimpanzee
ENSG00000104067	0.0675676	Human-Chimpanzee
ENSG00000104081	0.6	Human-Chimpanzee
ENSG00000104093	0.15748	Human-Chimpanzee
ENSG00000104112	0.101124	Human-Chimpanzee
ENSG00000104129	0.266667	Human-Chimpanzee
ENSG00000104131	1.85294	Human-Chimpanzee
ENSG00000104133	0.45122	Human-Chimpanzee
ENSG00000104142	0.119658	Human-Chimpanzee
ENSG00000104147	1.38298	Human-Chimpanzee
ENSG00000104154	1.56522	Human-Chimpanzee
ENSG00000104164	0.185484	Human-Chimpanzee
ENSG00000104177	0.72	Human-Chimpanzee
ENSG00000104205	0.15	Human-Chimpanzee
ENSG00000104213	0.469074	Human-Chimpanzee
ENSG00000104218	0.644068	Human-Chimpanzee
ENSG00000104231	0.350515	Human-Chimpanzee
ENSG00000104237	0.861538	Human-Chimpanzee
ENSG00000104267	1.53416	Human-Chimpanzee
ENSG00000104299	0.645977	Human-Chimpanzee
ENSG00000104312	0.604651	Human-Chimpanzee
ENSG00000104313	0.333333	Human-Chimpanzee
ENSG00000104320	0.256831	Human-Chimpanzee
ENSG00000104321	0.120567	Human-Chimpanzee
ENSG00000104324	0.649351	Human-Chimpanzee
ENSG00000104325	0.0992366	Human-Chimpanzee
ENSG00000104332	0.0372578	Human-Chimpanzee
ENSG00000104356	0.304762	Human-Chimpanzee
ENSG00000104361	0.978022	Human-Chimpanzee
ENSG00000104365	0.289277	Human-Chimpanzee
ENSG00000104368	0.0728155	Human-Chimpanzee
ENSG00000104369	0.1	Human-Chimpanzee
ENSG00000104375	0.173913	Human-Chimpanzee
ENSG00000104381	0.147059	Human-Chimpanzee
ENSG00000104415	0.225225	Human-Chimpanzee
ENSG00000104419	0.0325444	Human-Chimpanzee
ENSG00000104432	0.137143	Human-Chimpanzee
ENSG00000104435	0.496497	Human-Chimpanzee
ENSG00000104447	0.197183	Human-Chimpanzee
ENSG00000104450	0.2	Human-Chimpanzee
ENSG00000104472	0.470588	Human-Chimpanzee
ENSG00000104497	0.130841	Human-Chimpanzee
ENSG00000104499	0.716418	Human-Chimpanzee
ENSG00000104517	0.0298507	Human-Chimpanzee
ENSG00000104518	0.331361	Human-Chimpanzee
ENSG00000104522	0.462585	Human-Chimpanzee
ENSG00000104529	0.251701	Human-Chimpanzee
ENSG00000104537	0.846154	Human-Chimpanzee
ENSG00000104549	0.326733	Human-Chimpanzee
ENSG00000104611	0.350943	Human-Chimpanzee
ENSG00000104613	0.0660377	Human-Chimpanzee
ENSG00000104626	0.0920245	Human-Chimpanzee
ENSG00000104635	0.125	Human-Chimpanzee
ENSG00000104671	1.59091	Human-Chimpanzee
ENSG00000104679	0.240175	Human-Chimpanzee
ENSG00000104687	0.173745	Human-Chimpanzee
ENSG00000104689	1.2	Human-Chimpanzee
ENSG00000104691	0.550525	Human-Chimpanzee
ENSG00000104714	0.838902	Human-Chimpanzee
ENSG00000104722	0.194805	Human-Chimpanzee
ENSG00000104728	0.295019	Human-Chimpanzee
ENSG00000104738	0.164384	Human-Chimpanzee
ENSG00000104755	0.798077	Human-Chimpanzee
ENSG00000104760	2.91176	Human-Chimpanzee
ENSG00000104763	0.575	Human-Chimpanzee
ENSG00000104774	0.291262	Human-Chimpanzee
[truncated: 38,259 more rows]
